# Supplementary material for: Cell Wall Remodeling in Abscission Zone Cells during Ethylene-Promoted Fruit Abscission in Citrus
Source: Front Plant Sci. 2017 Feb 8;8:126. doi: 10.3389/fpls.2017.00126 (PMC5296326; doi:10.3389/fpls.2017.00126)
Supplement: Table S3 — Functional categories related to polysaccharide metabolism and subcellular localization regulated in the AZ-C and the FR. [file Table3.XLSX]

## Sheet: Glycoside Hydrolases
Gene name	Phytozome v10.2	CDS	peptide	Scaffold	Gene start	Gene end	Strand	Gene prediction	CDS	peptide	Scaffold	Gene start	Gene end	Strand	C. sinensis	% similarity
CitXXX.XX	INDUCED only in AZ-C
CitXXX.XX	INDUCED in both AZ-C and fruit rind
CitXXX.XX	INDUCED only in fruit rind
CitXXX.XX	REPRESSED only in AZ-C
CitXXX.XX	REPRESSED in both AZ-C and fruit rind
CitXXX.XX	REPRESSED only in fruit rind
CitXXX.XX	No hybridization results
CitXXX.XX	In-situ localization in AZ-C
GH1s β-glucosidases
CitBGLU1	Ciclev10008010m	ATGAGAGTCCCGCTTGCAGTTGCAGCCTCCTTCTACTTCTCCCTCTTGCTCGGCACTGTTACAATCCGGTGTGCTGCTGGTACATCTTACTTCGATGAAGCCGCACAGCCTGAAACTGTCCATTTCGACACCGGCGGGCTGAGCAGAGAAAGCCTCCCGAACGGCTTTGTGTTTGGAACGGCCACGTCCGCTTATCAAGTGGAAGGCATGGCCCACAAAGACGGTCGTGGGCCCAGCATTTGGGATGTCTTTGCTAAGAAGCCCGGAATTGTTGCCAATAATGCCACCGGGGATGTGTCCGTGGACCAATATCACCGTTACAAAGAGGATGTTGATATCATGGCAAATTTGAATTTTGATGCATACCGGTTCTCAATTTCCTGGTCCAGAATTTTCCCA…	MRVPLAVAASFYFSLLLGTVTIRCAAGTSYFDEAAQPETVHFDTGGLSRESLPNGFVFGTATSAYQVEGMAHKDGRGPSIWDVFAKKPGIVANNATGDVSVDQYHRYKEDVDIMANLNFDAYRFSISWSRIFPYGTGKVNWKGVAYYNQLINYLLKRGITPYANLYHYDLPEALEKKYIGLLSKRVVKDFADYADFCFKTFGDRVKNWMTFNEPRVVAALGYDNGFFAPGRCSKAFGNCTVGNSATEPYIVAHNSILSHAAAVQRYRQKYEQKQKGRIGILLDFVWYEPLTRSKADNYAAQRARDFHVGWFIHPIVYGEYPKTMQNIVGNRLPKFTKEEVKMVKGSIDFVGINQYTAYYMYDPHLKQPKQVGYQQDWNAGFAYEKNGVPIGPRANSYWL…	1	14592248	14596429	1	aCL1764Contig1							orange1.1t00039.1	99.2
CitBGLU2	Ciclev10007996m	ATGATCTCTAAATTTCATCACTTCTCTGCTTTCCTCTTCTTCCTTGTTCTGCTTCAGCTTTGGCCTGTTCTTTCTTTAGCTAAAAGCACTTGCAATGAGAACGAACAAGTAGATGTCAAAAGGTCTGATTTCCCAGATGGGTTCCTCTTTGGCACAGCCACTTCTTCGTTTCAGGTTGAAGGAGCCTATCTTGAGGATGGTAAAAGCCTCAGCAATTGGGATGTTTTTAGTCATATCCCTGGGAACATAGAAAATAATGATAATGGGGATGTTGCTGATGATCATTACCATCGCTTCTTGGAAGACATTGAGATAATGCATTCTCTTGGAGTAAATTCATATCGATTTTCGATTTCATGGCCTAGAATTTTACCTAAGGGAAGATTTGGTGAAGTTAAT…	MISKFHHFSAFLFFLVLLQLWPVLSLAKSTCNENEQVDVKRSDFPDGFLFGTATSSFQVEGAYLEDGKSLSNWDVFSHIPGNIENNDNGDVADDHYHRFLEDIEIMHSLGVNSYRFSISWPRILPKGRFGEVNPAGINFYNYLIDNLLLRGIEPFVTIYHHDFPQQIEDKYGSWLSPQMQKEFVHLAKTCFENFGDRVKYWATLNEPNLLTDMAYIRGTYPPTHCSAPFGNCSAGNSDTEPLIVLHNMLLSHAKAVKLYRKHFQEKQGGSMGIVLHSMMYEPLRDEDSDRQAVSRALAFNVGWMLDPLVFGDYPAEMREYLGSQLPRFSKEETKYVKGSLDFIGINHYSTLYAKDCIHSVCVLGSNHAIRGFVYTTGERDGIMIGEPTGNPRFFVVPEG…	1	18203020	18206175	-1	aCL8111Contig1|aC02027C07SK_c							Cs1g06790.1	73.8
CitBGLU3	Ciclev10008012m	ATGAACCGTGCTTATTACGTGCTTTTTCGCGTGCCGTGCTTTGACCCATCTCTAATCGTGCCGTGCTTTAAGGCCCGCGTGCCTAAAATTCTAGGCCCGGCACAGCCCACCTGCGTGCCGTGCCGTGCCTCGTGCCTCACCGAAACGTGCTCGTGCCGTGCCGTGCCCGTGCCGTACCACGTGCCGCCCGGCCCATTGACCATCTTTAGCCGGGACGTGAACATAAACAAAATATCAAGGATGGATACTTGTCTTATAACTCCTGAAAAAATTCGAGCATTTTCGTGTAATGAACTTTCTTCTATGGCAATCACTCTAATCTCGATTTTACTGATCACCAACCTTGTCGCGAACTCGGAATCCATCAGCAGGGCTGATTTTCCAGATGGGTTCATCTTC…	MNRAYYVLFRVPCFDPSLIVPCFKARVPKILGPAQPTCVPCRASCLTETCSCRAVPVPYHVPPGPLTIFSRDVNINKISRMDTCLITPEKIRAFSCNELSSMAITLISILLITNLVANSESISRADFPDGFIFGTASSAYQFEGAVNEGNKGPSIWDSFTRQPGRIMDFSNADTAVDQYHRFKVKTQSLQSDIDLMKDLGMDAYRFSISWPRIFPNGTGEPNPEGISYYNSLIDALLEKGIQPCVTLYHWDLPQVLEDKYGGWLSRQIIEDFEHYAFTCFQEFGDRVKYWITFNEPHGFTLQGYDTGLQAPGRCSILGHLFCKTGKSSIEPYVVAHNILLSHAAAYHSYRINFKEKQGGQIGIALDAKWYEPKSDSDEDKDAAQRAIDFGIGWFLDPLF…	1	20102612	20107488	-1								Cs4g11970.1	79
CclBGLU.04	Ciclev10017777m	ATGGCAATTCAAACCAACTCTCTCTTTGCTCTCCTCATTCTTCTTGGCTCGGCGAGCATTAGCAATTTTGTTGCTGCTGCTAAAATAACAAATAATTATGATACAGCTTTTTTTAATAGAACTAGTTTTCCCCCTGGCTTCATTTTCGGAACAGCATCATCAGCTTATCAGTATGAAGGTGCAGCAACTGAAGGTGGAAGAGGTCCAAGCTTATGGGATACTTACACTCACAGACACCCAGATAAGATAAAAGATGGCAGCAATGGAGATGTGGCTGTTGATTCGTATCATCGCTATAAGGAAGATGTTCGAATCATAAAAGAAATGAACCTTGATGCTTACAGATTCTCCATCTCATGGTCTAGAATACTGCCAAATGGAAAGCTGAGCGGGGGCGTG…	MAIQTNSLFALLILLGSASISNFVAAAKITNNYDTAFFNRTSFPPGFIFGTASSAYQYEGAATEGGRGPSLWDTYTHRHPDKIKDGSNGDVAVDSYHRYKEDVRIIKEMNLDAYRFSISWSRILPNGKLSGGVNKEGIRFYNNLINELTANGIQPFVTLFHWDTPQALEDEYGGFLSPRIVNDFRDYAQVCFREFGDRVKHWITLNEPWTYSVGGYGDGSLAPGRCSDWQQLNCTGGDSGVEPYLVAHHHLLAHAAAVHLYKNTYQTTQKGKIGITLVSSWMVPYSSAKHHQNAAERALDFMLGWFMDPLTNGNYPHTMQSLVADRLPKFSKEQSEMLEGSFDFLGLNYYTSSYVAYAPQLRSATKSCLTDAIANLLSWNKSNFYVLQLNAASDWLYVY…	2	5401278	5408814	1								orange1.1t03777.1	71.4
CitBGLU5	Ciclev10015030m	ATGGTGAAGAAAGAGGAGTTGTTGAAGGAATATGAACAAGTTGAACCAACAAATGTGTCTAAAACTCATTTCCCTCCAAACTTTGTCTTTGGAGTTGCCACTTCTGCCTATCAGATTGAAGGAGCCTGCGAAGAGGGTAATAGAGGTGCTAGCATATGGGATGATTTTACACACACTGAAGGTAAAATTATTGACAAAAGCAATGGTGATGTGGCGGTGGATCATTATCATAGATACAAGGAAGATATCGACCTCATAGCAAAGTTGGGATTTGATGCTTATAGGTTTTCCATATCATGGTCTCGCATCTTCCCTGATGGTTTAGGAACCAAAATAAACATGGAAGGGATCACTTTCTACAACAATATCATTGATGCTCTTCTTCAAAAGGGTATTCAG…	MVKKEELLKEYEQVEPTNVSKTHFPPNFVFGVATSAYQIEGACEEGNRGASIWDDFTHTEGKIIDKSNGDVAVDHYHRYKEDIDLIAKLGFDAYRFSISWSRIFPDGLGTKINMEGITFYNNIIDALLQKGIQPYVTLYHWDLPLHLHESMGGWLNKEIVKYFEIYADTCFASFGDRVKNWITINEPLQTAVNGYCTGIFAPGRHQHSSTEPYLVAHHQILAHAAAFSLYQRKYKDKQGGNIGLVVDCEWAEANSDKIEDKSAAARRLDFQIGWYLHPIYYGDYPEVMRNNLGDQLPKFMQKDKELVRNSLDFVGLNHYTSRFIAHATKSPEEGSFYEAQEMERLVEWEGGEVIGEKAASEWLYVVPWGLRKVLNYIAKTYNNPPIYVTENGMDDEEND…	2	29492432	29498475	-1	aIC0AAA36CE06RM1_c|aC16012H07SK_c							Cs2g12100.1	99.2
CitBGLU6	Ciclev10014887m	ATGAATTTCCCAACAGTGGATACTGCTCTCTTTCTCTTAATGATGCTACTCTCACCTCTCTTCATATCTTGTGATCAAACAACTCTGAAACAAAGCTTGGATCCATCTCCATTTCCTTCCAACTTTCTCTTTGGAACTTCCACCTCCTCATATCAGGTCGAAGGTGCTTATTTGAGTGAAGGTAAAGGTTTGAGCAACTGGGATGTTTTTACTCATACACCTGGAAACATAGATGATGGAAGCAGTGGGGATGTGGCCGTGGATCATTATCATCGCTATCTGGAAGACATCGATCTTATGGAGTCCCTGGGAGTGAACAGCTATCGCTTCTCAATTTCATGGGCAAGAATTTTACCAAAAGGGAGATTTGGGGACGTCAATTCAGAGGGTATTAACCAC…	MNFPTVDTALFLLMMLLSPLFISCDQTTLKQSLDPSPFPSNFLFGTSTSSYQVEGAYLSEGKGLSNWDVFTHTPGNIDDGSSGDVAVDHYHRYLEDIDLMESLGVNSYRFSISWARILPKGRFGDVNSEGINHYNKLIDALLLKGIQPFVTLTQFDSPQEIEDKYGAWLSPESQQDFGYFADICFKSFGDRVKFWFTINEPNMQVILSYRLGRHPPAHCSQPFGNCSRGNSEEEPFIAAHNLILSHATAVDIYRTKYQKDQGGSIGIILNTVWFEPISSSTADKLAAERAQSFYMNWFLDPIIHGKYPAEMMNIVGSTLPKFSSRDKEKLKQGLDFIGINHYTSTYVQDCIFSACKPGPGASKTEGFCLQNSQKHGVPLGEPTTLFWQNVYPQGMWKII…	2	32137992	32143332	-1	aKN0AAA3BD08ZM1_c|aC20002C09SK_c							Cs2g07740.1	80.4
CitBGLU7	Ciclev10017801m	ATGACATTCAGCCAAGTAATACTTAGCAATTACAAGTGTTGGACGTCAAGAGGGCCATTCCGTTTTCAGTTTCTGAAAAACATCTCTCGGATTGTGCTACCAGAGTCACCACTCTATTTTATTTCTTTGCAACTGTATGAAGGAGCTTTCCTGACTGATGGAAAAGGCCTAAACAACTGGGACAATTTTACCCACAAGCCTGGAAACATCATGGATGGAAGTAATGGAGATGTTGCTGTGGATCATTACCATCGATATCTGCAAGATTTGGATCTCATGGACTACCTTGGAGTCAACAGCTACCGTTTCTCTATATCATGGGCAAGAGTTTTACCCAATGGAAGATTTGGAGACGTGAATTGGGCTGGCATTGATCATTACAACAAGTTAATCAATGCT…	MTFSQVILSNYKCWTSRGPFRFQFLKNISRIVLPESPLYFISLQLYEGAFLTDGKGLNNWDNFTHKPGNIMDGSNGDVAVDHYHRYLQDLDLMDYLGVNSYRFSISWARVLPNGRFGDVNWAGIDHYNKLINALLLKGIQPFVTLTHYDIPQELEDRYGAWLSRETLRFPTNADRKFSREDFEYYADICFKYFGDRVKYWATFNEPNVVVIRGYQSGIYPPSRCSGLFGNCTNGDSEKEPFIAAHNIILSHAAAVKIYRTKYQKEQEGNIGIVMNVLWLEPMSNSLEDKLAAERAQAFYLNWFLDPIIFGKYPKEMYEILGSSLPSFSKYDLEKLKNGLDFVGINHYTSFYVKDCIFSVCEPGPGNSKTEGSILRTAKRNGVLIGEPTDVDWLFVYPQG…	2	32147048	32152345	-1								Cs2g07730.1	89.7
CitBGLU8	Ciclev10023390m	ATGGCCTTTTCAGCACCTTTGTCATCACGCATTAGGAATTCAACACGAGCTTTACCTTCGATCTTTGCCACTGTTTATGTTTTGCTGCTTTCCTGCAGCTTGTCTGCGCAGTGTCATGAGTTCACATCACTGTCGAAGTCGGAAGCACACACTGGCCTCAACTCCAATGTATTGAATATCAAGAGATCCAATTTTCCAGCTAATTTCTCATTTGGAGCCTCAACTTCTGCTGCACAGATTGAAGGAGCAACGACAGAAGATGGGAAGGGACCAAGCATTTGGGATGATTTCATTGAAAGATATCCAGGGAAAGTTATGAACGGAAATGACCTGATCACAGCAATAGATTCATACAGGCGCTACAAGGAAGATATGAAAGCTGTGAAAGAACTTGGAGTT…	MAFSAPLSSRIRNSTRALPSIFATVYVLLLSCSLSAQCHEFTSLSKSEAHTGLNSNVLNIKRSNFPANFSFGASTSAAQIEGATTEDGKGPSIWDDFIERYPGKVMNGNDLITAIDSYRRYKEDMKAVKELGVDSYRFSISWTRILPNGSLSGGVNQMGIDHYNSLIDELIKYGIKPFVTIFHFDSPQGLQEKYGGPLNRSFVDDFKDYAEICFKSFGDRVKNWMTINEPLIASKYGYESGTAAPGRCSDRNNCPAGNSSTEPYIASHNFLLAHAAAFRLYEQKFRAKQGGQIGLSLVSQFYEPLSNSSDDEAAAERALDFQLGWYLNPLVYGDYPKIMRKLARNRLPTFTAEEKKLVKGAFDFIGLNYYTTNYAKSIPMNSNDPPAEGSGYIYIYPKG…	3	4237953	4241418	1								Cs5g07030.1	90.9
CitBGLU9	Ciclev10019788m	ATGATGTTGAGGCTCTCTTTCTTGCTAATGTATCTGCTTAATTTGGCAACATCAGCACTTACTGCTGTTGAATATAGCAAAAATGACTTCCCACCTGGCTTCCTTTTTGGTGCTAGCACTTCAGCTTATCAGGTAGAGGGGGCAGCAAATGAAGATGGAAGGACTCCTAGCATTTGGGATACGTTTGCACATGCCGGGAACGTACATGGCACTGGAGACATAGCATGCGATGGGTATCATAAATACAAGGAAGATGTGAAGCTCATGGCGGACACAGGGCTAGATGCCTATAGATTTTCCATCTCATGGTCTAGACTAATTCCAAATGGAAGAGGACCTGTCAATCCGAAGGGTTTACAGTACTACAACAACCTCATAAATGAGCTAATCAGCTATGGA…	MMLRLSFLLMYLLNLATSALTAVEYSKNDFPPGFLFGASTSAYQVEGAANEDGRTPSIWDTFAHAGNVHGTGDIACDGYHKYKEDVKLMADTGLDAYRFSISWSRLIPNGRGPVNPKGLQYYNNLINELISYGIQPHVTLHHFDLPQALEDEYGGWINRTIVKDFTAYADVCFRQFGDRVSYWTTVNEPNAFANLGYDYGIAPPQRCSSINHCSRGNSSTEPYITVHHVLLAHASVARLYRKKYQDKQRGYIGVNIFAFGLLPLTNSTEDAIATQRYYDFLIGWMANPLVYGDYPKIMKQNVGSRLPAFSDRESKQVKGSADFLGVINYYIVYVKDNPSSLNKKLRDWNADSATEIFFNLDTASSNEFPIQPLGLQRVLEHFKQLYGNPPMYIHENGQN…	3	45738969	45744379	-1	aCL3841Contig1							Cs5g33120.1	32.9
CitBGLU10	Ciclev10019719m	ATGAAGCAGAGCAGAACCGCGTCCTCCGTTGACATGATGTTGAGACTCGTTTTCCTGTTAATAAATCTGCTTAATTTGGCAGCACCAGGCCTACCACTAGCGGCTGATGAATATAGCAAACGTGACTTCCCACCGGGCTTCATTTTTGGTTCTGGCACCTCAGCCTATCAGGTGGAGGGAGCGGCAAATGAAGATGGAAGGGCTCCTAGCATTTGGGATACGTTTACACACGCCGGGAATGTACATGACAATGGAGACATAGCAAGCGATGGGTATCATAAGTACAAGGAAGATGTGAAACTCATGGCGGACACAGGCTTAGACGCCTATAGATTTTCTATCTCATGGTCAAGACTAATTCCAAATGGAAGGGGACCTGTCAATCCAAAGGGTTTACAA…	MKQSRTASSVDMMLRLVFLLINLLNLAAPGLPLAADEYSKRDFPPGFIFGSGTSAYQVEGAANEDGRAPSIWDTFTHAGNVHDNGDIASDGYHKYKEDVKLMADTGLDAYRFSISWSRLIPNGRGPVNPKGLQYYNSLINELISHGIQPHVTLHHYDLPQALEDEYGGWINQTIVQDFTAYANVCFREFGDRVSYWTTVNEPNAFALLGYDIGIAPPKRCSPPFKNCRKGNSSTEPYMAVHHVLLAHASVARLYRKNYQDKQHGYIGMSIFTYGLLPLTNSTEDAIATQRYNDFLVGWIANPLVYGDYPNIMKKNVGSRLPLFTYLESKQVKGSADFLGVNNYNSGYIKDNPSSLKQELRDWNADTAAEIFLNLDTASANEFPIEPWGLQQVLEYFKKV…	3	45746883	45751646	-1	aIC0AAA36DA02RM1_c|aC18020D10Rv_c							Cs5g33120.1	37
CitBGLU11	Ciclev10031299m	ATGCTGTTTAAAAGCGGCATTGCTAATTTGGTCGTATCACTACTACTGGTTGCGTTTGGGATCCAGACTTGCTCTTCACAAATTAACAGAGCTAGCTTCCCAAAGGGTTTTGTTTTTGGGACTGCATCCTCTGCTTTCCAGTATGAAGGAGCAGTGAAAGAGGATGGAAGGGGACCGACTGTCTGGGACACATTTTCACATACTTTTGGTAAGATACTGGATAATAGTAATGCTGATGTTGCCGTGGATCAGTACCACCGCTACCCTGAAGATGTACAACTTATGAAGGACATGGGCATGGATGCTTACCGGTTTTCTATTGCTTGGTCTCGGATTTTCCCCAATGGAACGGGGCAAATAAATCAGGCAGGTGTTGATCATTACAACAAACTCATTGAT…	MLFKSGIANLVVSLLLVAFGIQTCSSQINRASFPKGFVFGTASSAFQYEGAVKEDGRGPTVWDTFSHTFGKILDNSNADVAVDQYHRYPEDVQLMKDMGMDAYRFSIAWSRIFPNGTGQINQAGVDHYNKLIDALLAKGIEPYVTLYHWDLPQALDDKYKGWLDRQIINDFATYAETCFQKFGDRVKHWITFNEPHTFTIQGYDVGLQAPGRCSILLHLFCRAGNSATEPYIVAHNALLTHAKVADIYRKKYKAKQGGSLGIAFDVIWYESASNSTEDAEATQRAQDFQLGWFLDPLMFGDYPSSMRNRVGSRLPRFTSSEAALLKGSLDFVGINHYTTFYAQRNATNLIGVVLNDSLADAGALTIPFKNGKPIADRANSIWLYIVPRGMRSLMNYIKQ…	4	20876052	20880532	1	aC18004D03Rv_c							Cs7g11210.1	99.8
CitBGLU12	Ciclev10031212m	ATGGCAATTCAAAATCAGTTATTGTTAATATGTAGCATCGGGGCCCTCGCTGGCTTGTTAGTGTTGGCCACCAGTCGCAGTTGCAGTGCTGATGGTGCCGCAGAAGCAGAAGAGATACAAATGCCAATCAACAGGAGTAATTTTCCGCCCGGTTTTATATTTGGAGCCGGGACATCCGCTTACGCGGCAGAAGGAAACGTAAATATAGATGGCAAAAGTCCGAGTATATGGGATACTTTCGCCAACAATCACCCAGAAAAAATCCATGATGGTAGCAATGCAAATGTTGCAATTGATTTTTATCATCGATACAAGGAGGATATAAAATTGATGAAAGAAACTGGATTGGATTCTTTCAGATTCTCCATTTCATGGCCAAGACTATTGCCCAAGGGGAAA…	MAIQNQLLLICSIGALAGLLVLATSRSCSADGAAEAEEIQMPINRSNFPPGFIFGAGTSAYAAEGNVNIDGKSPSIWDTFANNHPEKIHDGSNANVAIDFYHRYKEDIKLMKETGLDSFRFSISWPRLLPKGKISGGVNPLGVQFYNNLIDELIANGIKPFVTLFHWDLPQVLEDEYGGFLSSEIVKDFGDYADFCFKTFGDRVKQWATMAEPNSISIGGYTIGVYAPGRCSSSLGSNCAAGDSATEPYIVSHNLLLSHATAVKLYKEKYQGHQKGEIGITIVTQWFIPKTESPADQEAASRMLDFLFGWFAHPITYGEYPEVMTTLVGSRLPNFSKTESEMLKGSYDFLGINYYAPMYAEDSSSSTSNSDTISYSTDSRVTLSTHKDGNPIGTPTTLP…	4	25285786	25288711	1	aKN0AAL1CG06FM2_c							Cs7g01340.1	98.9
CitBGLU13	Ciclev10031209m	ATGTTAAACCAAATGGGTATTAACTTTAAAGGCTTTGCTGTCCAGGTGCAGTGGTTGTTCATCGTCCTGGTGGCTTGGTTATTAGTTGAAACCGAGCACGAGATAGGCATTGCGTTGGCAAGTGGTCATTTTGACGATGATGTTGAGTCCTCTTCCAAATTCAATCGTAGTTGTTTTCCAAAAGGGTTCATCTTCGGGACTGCCGCTGCTGCTTATCAGTACGAGGGTGCTGCTGCTGAGGATGGTAGGGGACCTAGTATTTGGGATACATTCACTCACAAATACCCAGATAGGATAAAAAATCATGACAACGGAGACATAGCGGTTGATTTTTACCATCGTTATAAAGAAGATGTGAAGATTATGAAGGAAATGAATTTGGATGCTTTCAGATTCTCC…	MLNQMGINFKGFAVQVQWLFIVLVAWLLVETEHEIGIALASGHFDDDVESSSKFNRSCFPKGFIFGTAAAAYQYEGAAAEDGRGPSIWDTFTHKYPDRIKNHDNGDIAVDFYHRYKEDVKIMKEMNLDAFRFSISWSRLLPNGKLSGGVNNKGISFYNNLINELLSNGLQPFVTIFHWDLPQALEDDYGGFLSPRIVADFQDYAELCFKEFGDRVKHWITLNEPHSYSSNGYNKGTDAPGRCSKWVNKACQAGNSSTEPYIVGHHQLLSHAAAVKVYKEKYQAIQKGKIGITLISDWMVPYSNEKPNVEAADRALDFFLGMYMDPLIYGNYPFIMRTLVRERLPKFANEQSVMLKGSFDFIGMNYYSSNYAVDIPVANSINISYSTDSQANLTAVRNGK…	4	25291158	25295311	1	aCL5755Contig1|aC05075B09SK_c							Cs7g01350.3	100
CitBGLU14	Ciclev10031262m	ATGGGAATTGAAAGGTCTCTTGTGGGAGGATGCATGCTCCTGGTTGTGGTGGCATTATTATTAGCACAAAACAGAGCAACTGGAAGAGGAATTGATGGCAATGCGAATCTCAATCGCAATTGTTTTCCAAAAGAGTTTATCTTCGGGACAGCGGCTTCTTCTTACCAGTATGAAGGTGCTGCAGCTGAGGATGGCAGGGGCCTTAGTATTTGGGATACCTTCACTCACAAATTCCCAGATAGAACAAATCACGGTGACAATGGAGACGTAGCAGTTGATTTTTACCATCGCTATAAGGAGGATGTGAAGCTTATGAAGGAAATGAATTTGGATGCTTTCAGATTTTCCATCTCTTGGTCTAGAATATTACCAAATGGAAAGCTAAGTGGGGGAGTGAAC…	MGIERSLVGGCMLLVVVALLLAQNRATGRGIDGNANLNRNCFPKEFIFGTAASSYQYEGAAAEDGRGLSIWDTFTHKFPDRTNHGDNGDVAVDFYHRYKEDVKLMKEMNLDAFRFSISWSRILPNGKLSGGVNRKGIGFYNNLINELLSNGLQPFVTLFHWDLPQGLEDEYGGFLSPHIVDDFSDFADICFKEFGDRVKHWITLNEPHSYSTGGYSEGYGAPGRCSKYKNQACQVGDSSTEPYLAGHHQLLAHAAAVEVYKRKYQANQKGVIGITLNSHWFVPYSNEKPDVEAAQRALDFMLGWYMDPVINGDYPLSMHTLVKERLPKFTEEQSARLKGSFDFIGMNYYTSYYARNNPVVNTINISYTTDSLANLTAMRNGKLIGPQAASNWLFVYPSG…	4	25299426	25303339	1	aC31103D08EF_c							Cs7g01360.1	99.8
CitBGLU15	Ciclev10033361m	ATGCCATTCAACCGAACTAGTTTTCCTGCTGGCTTCATATTTGGCGCTGGCTCAGCTGCTTACCAGTCTGAAGGAGCAGCACTTGAAGATGGAAGGGGACCGAGTATATGGGACACTTTCGTTAGAGAACATCCAGAGAAAATTTTTGATCGGAGCACTGGAGATATAGCTAGTGGTTTTTATCACCATTACAAGGAGGACATTAAGCTGATGAAAAAGGTTGGCTTAGACTCTTTCAGATTCTCCATCTCATGGACCAGAATATTACCTAAGGGAAAAATTAGTGGGGGAGTGAACCCACTAGGCGTCAAGTTCTACAATGACCTCATCAACGAGCTTCTTGCCAATGATATCAAACCCTTTGTGACTTTACTCCATTTTGATCCTCCACAAGCACTC…	MPFNRTSFPAGFIFGAGSAAYQSEGAALEDGRGPSIWDTFVREHPEKIFDRSTGDIASGFYHHYKEDIKLMKKVGLDSFRFSISWTRILPKGKISGGVNPLGVKFYNDLINELLANDIKPFVTLLHFDPPQALEEEYGGFLSPKIVKDFVDYGDFCFKTYGDRVKLWASMNEPNGMVMNGYNVGSFAPGRCSNYVGNCTAGDSATEPYIAAHTMLLSHGALVNLYKHKYQPYQKGKIGITILTHWFEPKFKTAASRQAASRARDFFFGWFADPVTFGNYPESMRRIVGKRLPKFTEGESKLVKGSFDFLAINYYTTNYADAAPPPNAFQLSYTADRQVNLTTERDGVPVGSPTALGWLFVHPKGLQELLLYVKKKYNNPTIYITENGLADDASLPLKVA…	4	25305841	25310458	1	ESTs Swingle citrumelo roots	ATGCCATTCAACCGAACTGGTTTTCCTGCTGGCTTCATATTTGGCGCTGGCTCAGCTGCTTACCAGTCTGAAGGAGTAGCACTTGAAGATGGAAGGGGACCGAGTATATGGGACACTTTCGTTAGAGAACATCCAGAGAAAATTTTTGATCGGAGCACTGGAGATATAGCTAGTGGTTTTTATCACCATTACAAGGAGGACATTAAGCTGATGAAAAAGGTTGGCTTAGACTCTTTCAGATTCTCCATCTCATGGACCAGAATATTACCTAAGGGAAAAATTAGTGGGGGAGTGAACCCACTAGGCGTCAAGTTCTACAATGACGTCATCAACGAGCTTCTTGCCAATGATATCAAACCCTTTGTGACTTTACTCCATTTTGATCCTCCACAAGCACTC…	MPFNRTGFPAGFIFGAGSAAYQSEGVALEDGRGPSIWDTFVREHPEKIFDRSTGDIASGFYHHYKEDIKLMKKVGLDSFRFSISWTRILPKGKISGGVNPLGVKFYNDVINELLANDIKPFVTLLHFDPPQALEEEYGGFLSPKIVKDFVDYGDFCFKTYGDRVKLWASMNEPNGMVMNGYNVGSFAPGRCSNYVGNCTAGDSATEPYIAAHTMLLSHGALVNLYKHKYQPYQKGKIGITILTHWFEPKFKTAASRQAASRARDFFFGWFADPVTFGNYPESMRRIVGKRLPKFTEGESKLVKGSFDFLAINYYTTNYADAAPPPNAFQLSYTADRQVNLTTERDGVPVGSPTALGWLFVHPKGLQELLLYLKKKYNNPTIYITENGLADDASLPLKVA…	4	25305841	25310461	1	Cs7g01370.1	90.8
CitBGLU16	Ciclev10031178m	ATGATGAAGCTTCCATATATAATTCATCGGAAGGGAGAGGTAGGGAGAGTGGAAGTTAAATTTCAGAATCTTTTTGTCTGTTATCTGATCACATCTTCGATTTGCTTATCATCTGTATGCCTCCCCTGCTACGGCTCCACTCGGAATAGCTTTCCGCCTGAGTTTTTATTTGGAACAGCATCAAGTGCTTACCAGTATGAAGGAGCAGCTCACGTTGGAGGGAGGAAACCAAGCGTATGGGATACCTTCGCCATGGATCAACCAGAGAAAATTTTGGACCACAGTAATGGGGATGTAGCTGACAACTTTTACTTTCGTTACAAGGAGGACATTGCTTTGGTGAAGCAAGTTGGTTTCGACTCCCTAAGATTCTCAATATCATGGTCCAGAATTTTACCT…	MMKLPYIIHRKGEVGRVEVKFQNLFVCYLITSSICLSSVCLPCYGSTRNSFPPEFLFGTASSAYQYEGAAHVGGRKPSVWDTFAMDQPEKILDHSNGDVADNFYFRYKEDIALVKQVGFDSLRFSISWSRILPHGNISGGVNQQGVDFYNNLINELISYGLKPFVTLFHWDTPQALEDEYGGFLSPKIVKDFGDYADLCFKEFGDRVKHWITLNEPETVGENGYAKGTHAPGRCSNYIGNCPAGNSATEPYVAAHYLILSHATAVKLYRQNYQPSQNGLIGITISSIWAVPKFPTVASKKAASRAIDFKFGWFFNPITYGSYPRSMQHLVGNRLPKFTKSQAEMVKGSVDFLGLNYYTADYAEEVTSFSNTNLSYTTDSRVNRTKEKNGFPIGQPTGSD…	4	25314587	25318633	1								Cs7g01380.1	98.9
CitBGLU17	Ciclev10031179m	ATGATGAAGCTTCCATATATAATTCATCGGAAGGGAGAGGTAGGGAGAGTGGAAGTTAAATTTCAGAATCTTTTTGTCTGTTATCTGATCACATCTTCGATTTGCTTATCATCTGTATGCCTCCCCTGCTACGGCTCCACTCGGAATAGCTTTCCGCCTGAGTTTTTATTTGGAACAGCATCAAGTGCTTACCAGTATGAAGGAGCAGCTCACGTTGGAGGGAGGAAACCAAGCGTATGGGATACCTTCGCCATGGATCAACCAGAGAAAATTTTGGACCACAGTAATGGGGATGTAGCTGACAACTTTTACTTTCGTTACAAGGAGGACATTGCTTTGGTGAAGCAAGTTGGTTTCGACTCCCTCAGATTCTCAATATCATGGTCCAGAATTTTACCT…	MMKLPYIIHRKGEVGRVEVKFQNLFVCYLITSSICLSSVCLPCYGSTRNSFPPEFLFGTASSAYQYEGAAHVGGRKPSVWDTFAMDQPEKILDHSNGDVADNFYFRYKEDIALVKQVGFDSLRFSISWSRILPHGNISGGVNQQGVDFYNNLINELISNGLKPFVTLFHWDTPQALEDEYGGFLSPKIVKDFGDYADLCFKEFGDRVKHWITLNEPETVGENGYAKGTHAPGRCSNYIGNCPAGNSATEPYVAAHHLILSHATAVKLYRQNYQPSQNGLIGITISSIWAVPKFPTVASKKAASRAIDFKFGWFFNPITYGSYPRSMQHLVGNRLPKFTKSQAEMVKGSVDFLGLNYYTADYAEEVTSFSNTNLSYTTDSRVNRTKEKNGFPLGQPTGSD…	4	25340527	25344536	1	aCL5744Contig1							Cs7g01380.1	99.1
CitBGLU18	Ciclev10004010m	ATGAAAGCTGCCTCTTTCATAAGCACTTATTTGCTCATTGCTTTTCTTTGCGTTACAAATGCAGTTGATCTAGATGTAAGGCCAGATGGTCTTGACACTGCAGGAATGAGCAGAAAAAGTTTCCCAGAAGGATTTATCTTCGGAACTGCGACGTCGGCGTATCAAGTTGAAGGCATGACTGATAAAGATGGAAGAGGACCTTGCATCTGGGATCCTTATGTCAAGGCTGGAAATATTGCCAACAATGCTACTGCTGATTTGACTGTAGATCAATATCATCATTACAAGGAAGATATTGATATCATGGCAAAATTAAATTTTGATGCTTACCGATTTTCAATTTCCTGGTCCAGGATCTTCCCAAATGGAACTGGAGAAGTAAATCCGTTGGGGGTTGCT…	MKAASFISTYLLIAFLCVTNAVDLDVRPDGLDTAGMSRKSFPEGFIFGTATSAYQVEGMTDKDGRGPCIWDPYVKAGNIANNATADLTVDQYHHYKEDIDIMAKLNFDAYRFSISWSRIFPNGTGEVNPLGVAYYNRLIDYMLKKGITPYANLYHYDLPLALQDKYNGLLSCDIVKDYADYADFCFKTFGDRVKNWFTFNEPRVIAALGFDNGINPPSRCSKGMGNCTAGNSATEPYIAAHNMILSHAAAVERFREKYQETQKGKIGILLDFVWYEPLTRSKADNLAAQRARDFHIGWFLHPITYGEYPRTMQEIVGERLPKFTDAEVEMVKGSIDYLGVNQYTTFYMFDPPWPKPNITGYQNDWNVGFAYDRKGVPVGPRANSGWLYIVPWGIYKAIT…	5	8663356	8666744	-1								Cs3g03850.1	100
CitBGLU19	Ciclev10013421m	TTCATCAAGCTAAAATCAAACGGCATGACGAAGAAGGCTTATGTACTCAATGCTCTCATATTGTTCCTTGTGTGCAACTTTGCACATTCCAGAAGAATAAATTGCATTGAAGGATACGATTCCGAAAATGCACGCATAGCATGTAACGACGGATTTGACACAGGCGGGTTGAGCAGAAAAAGTTTTCCGGAAGGATTTGTGTTTGGGACGGCAACATCCGCGTATCAAGTTGAAGGAATGGCTGACAAAGATGGCAGAGGACCCTGCATTTGGGATGTCTATGCTCACACACCAGGACACATCGCCAACAATGCTACTGCTGATGTTACTGTTGATCAGTATCATCGATACAAGGAAGATATAGATTTAATGAAAAATCTCAACTTTGATGCATATCGG…	FIKLKSNGMTKKAYVLNALILFLVCNFAHSRRINCIEGYDSENARIACNDGFDTGGLSRKSFPEGFVFGTATSAYQVEGMADKDGRGPCIWDVYAHTPGHIANNATADVTVDQYHRYKEDIDLMKNLNFDAYRFSISWSRIFPEGTGTVNQKGVDYYNRLIDYMLEQGITPYANLYHYDMPLALQEKYGGLLDCQVVKDYADYADFCFKTFGDRVKNWYTFNEPRVIAALGFDDGSNPPSRCSKEVNNCTDGNSGTEPYIAAHNMILAHAAAVQRYREKYQETQKGKIGILLDFVWYEPHTRSKADNLAAQRARDFHIGWFLHPLTYGEYPRTMQENVGDRLPKFTPEEVLMVQGSFDYLGVNQYTSYYMFDPPWPKSNISSYANDWDAGYAYDRNGVP…	6	22660969	22663127	-1	FGENESH	ATGACGAAGAAGGCTTATGTACTCAATGCTCTCATATTGTTCCTTGTGTGCAACTTTGCACATTCCAGAAGAATAAATTGCATTGAAGGATACGATTCCGAAAATGCACGCATAGCATGTAACGACGGATTTGACACAGGCGGGTTGAGCAGAAAAAGTTTTCCGGAAGGATTTGTGTTTGGGACGGCAACATCCGCGTATCAAGTTGAAGGAATGGCTGACAAAGATGGCAGAGGACCCTGCATTTGGGATGTCTATGCTCACACACCAGGACACATCGCCAACAATGCTACTGCTGATGTTACTGTTGATCAGTATCATCGATACAAGGAAGATATAGATTTAATGAAAAATCTCAACTTTGATGCATATCGGTTCTCTATTTCATGGTCAAGAATC…	MTKKAYVLNALILFLVCNFAHSRRINCIEGYDSENARIACNDGFDTGGLSRKSFPEGFVFGTATSAYQVEGMADKDGRGPCIWDVYAHTPGHIANNATADVTVDQYHRYKEDIDLMKNLNFDAYRFSISWSRIFPEGTGTVNQKGVDYYNRLIDYMLEQGITPYANLYHYDMPLALQEKYGGLLDCQVVKDYADYADFCFKTFGDRVKNWYTFNEPRVIAALGFDDGSNPPSRCSKEVNNCTDGNSGTEPYIAAHNMILAHAAAVQRYREKYQETQKGKIGILLDFVWYEPHTRSKADNLAAQRARDFHIGWFLHPLTYGEYPRTMQENVGDRLPKFTPEEVLMVQGSFDYLGVNQYTSYYMFDPPWPKSNISSYANDWDAGYAYDRNGVPIGQRANSG…	6	22660969	22663103	-1	Cs6g17820.1	99.6
CitBGLU20	Ciclev10013521m	ATGACGAAGAAGGCTTATGTACTCAATGCTCTCATATTGTTCCTTGTGTGCAACTTTGCACATTCCAGAAGAATAAATTGCATTGAAGGATACGATTCCGAAAATGCACGCATAGCATGTAACGACGGATTTGACACAGGCGGGTTGAGCAGAAAAAGTTTTCCGGAAGGATTTGTGTTTGGGACGGCAACATCCGCGTATCAAGTTGAAGGAATGGCTGACAAAGATGGCAGAGGACCCTGCATTTGGGATGTCTATGCTCACACACCAGGACACATCGCCAACAATGCTACTGCTGATGTTACTGTTGATCAGTATCATCGATACAAGGAAGATATAGATTTAATGAAAAATCTCAACTTTGATGCATATCGGTTCTCTATTTCATGGTCAAGAATC…	MTKKAYVLNALILFLVCNFAHSRRINCIEGYDSENARIACNDGFDTGGLSRKSFPEGFVFGTATSAYQVEGMADKDGRGPCIWDVYAHTPGHIANNATADVTVDQYHRYKEDIDLMKNLNFDAYRFSISWSRIFPEGTGTVNQKGVDYYNRLIDYMLEQGITPYANLYHYDMPLALQEKYGGLLDCQVVKDYADYADFCFKTFGDRVKNWYTFNEPRVIAALGFDDGSNPPSRCSKEVNNCTDGNSGTEPYIAAHNMILAHAAAVQRFREKYQETQKGKIGILLDFVWYEPHTRSKADNLAAQRARDFHIGWFLHPLTYGEYPRTMQENVGDRLPKFTPEEVLMVQGSFDYLGVNQYTSYYMFDPPWPKSNISSYANDWDAGYAYDRNGVPIGQRANSG…	6	22666694	22668827	-1								Cs6g17840.1	99.2
CitBGLU21	Ciclev10013386m	ATGAAGAAGAAGGCTTATGCAGTCCGTGCTTTCGTAGTGTTCCTTGTGTGCAACTTTGCACATTCAGCAAAGATAGCCTGCATTGAAGGATACGACACCGAAAATGCACGCATAGCTTGTAACGATGGATTTGACACAGCTGGGTTGACCAGAAAATCTTTTCCAGATGGATTTGTGTTTGGCACGGCAACTTCTGCATATCAAGTTGAAGGAATGGCTAACAAAGATGGCAGAGGACCTTGCATTTGGGATGTTTATGTTCACACCCCAGGAAACATTGCCAACAATGCTACTGCTGATGTTACTGTTGATCAGTATCATCGATACAAGGAGGATATTGATTTAATGAAAAAGCTAAACTTTGATGCATATCGGTTTTCTATTTCATGGTCCAGGATC…	MKKKAYAVRAFVVFLVCNFAHSAKIACIEGYDTENARIACNDGFDTAGLTRKSFPDGFVFGTATSAYQVEGMANKDGRGPCIWDVYVHTPGNIANNATADVTVDQYHRYKEDIDLMKKLNFDAYRFSISWSRIFPQGAGRVNWKGVAYYNRLIDYMLEQGITPYANLYHYDMPLALHERYGGLLGRQVVKDYADFAEFCFKTFGDRVKNWYTFNEPRVIAALGFDSGTNPPSRCSKEVNNCTEGDSGTEPYTAAHNMILSHASAVQRYRENYQQAQKGKIGILLDFVWYEPHSRSKADNYAAQRARDFHIGWFLHPLTYGEYPRTMQENVGERLPKFTPEEVAMVKGSYDYLGVNQYTSYYMFDPPWPQSNISSYANDWDVGYAYDRNGVPIGRRANSE…	6	22670046	22672321	1								Cs6g17850.1	99.6
CitBGLU22	Ciclev10029910m	ATGGTACCGCCGGCATGCAAATGGAGTGGATATGAAAACTTTTCTTCAGCTCATGATTTCAATTATGCAGGCGTTGTTTCGTGCACTTTAGAAGTCCAGAGAGCATTACCTGTTCTTAAGAAGGCATATGGTGACAGCATGCTCAAAATACTACATGTAGGACCTGAAACTTGTTCAGTGGTATCTAAATTGTTGAAAGAGGAGGATACTGAAGCATGGGGTGTTGAACCATATGACTTAGACGACGCTGATGCCAACTGCAGGAGTCTTGTGCGAAAAGGCATTGTGCGGGTGGCCGATATTAAGTTTCCTCTGCCCTATCGGGCAAAGTCATTTTCTCTAGTGATAGTGTCAGATGCTGTGGATTACTTGTCTCCAAAGTACCTTAACAGAACTCTT…	MVPPACKWSGYENFSSAHDFNYAGVVSCTLEVQRALPVLKKAYGDSMLKILHVGPETCSVVSKLLKEEDTEAWGVEPYDLDDADANCRSLVRKGIVRVADIKFPLPYRAKSFSLVIVSDAVDYLSPKYLNRTLPELARVSVDGVVIFAGWPFFLLIFLLNLAASALTAVEYTKNDFPPGFIFGSGTSAYQVEGAANEDGRTPSIWDTFAHAGNVPGTGDVACDEYHKYKEDVKLMADTGLDAYRFSISWSRLIPNGRGPVNPKGIQPHVTLHHFDLPQALEDEYGGWINRMIVKDFTAYADVCFREFGDRVSYWTTVNEPNGFAMLGYDFGIAPPKRCSSSFNNCSRGNSSTEPYMAVHHLLLAHASVARLYKKNYQDKQHGYIGLCIFSFGVFPLTNS…	8	1445478	1452095	1								Cs8g03370.1	69.9
CitBGLU23	Ciclev10028386m	ATGCCAGCTCACCCCCCCATATATCGAGGACGGATAGCCCGTCGTTTCAAATTTCAAATACGAAGAGTCTGGAGATGCCACGTCACCAACCGTTACAAGAGGCCAGGGAATGTGCTTGGCAATGGAGACATAGCATGTGATAAGTATCATAAGTACAAGGAAGATGTGAAGCTCATGGCAGACACAGGCCTAGATGCCTATAGACTTTCCATCTCATGGTCAAGACTAATTCCAAATGGAAGAGGACCTGTCAATCCAAAAGGTTTACAGTACTACAACAACCTCATAAATGAGCTAATCCGCTATGGAATCCAACCGCATGTCACATTACACCATTTTGATCTTCCTCAGGCACTGGAAGATGAGTATGGCGGATGGATCAATCGAATGATTGTGAAA…	MPAHPPIYRGRIARRFKFQIRRVWRCHVTNRYKRPGNVLGNGDIACDKYHKYKEDVKLMADTGLDAYRLSISWSRLIPNGRGPVNPKGLQYYNNLINELIRYGIQPHVTLHHFDLPQALEDEYGGWINRMIVKDFTAYADVCFREFGDRVSYWTTVNEPNGFAMVGYDFGIAPPKRCSSSFNNCSRGNSSTEPYMAVHHLLLAHASVARLYKKNYQDKQHGYIGLSIFSFGVFPLTNSEEDAIATQRYFDFLIGWVANPLVYGDYPKTMKQNAGSRLPAFTDRESQQIKGSADFIGVINYCMIYIKDNPSSLKQEHRDWSADTATMAFFEQDTAASSNEPSSLQIVLEYFKRVYGNPPIYVHENGLATPHHSSLEDISRVKYLHAYIGSVLDAVRNGSN…	8	1484041	1489074	1								Cs8g03370.1	86.3
CitBGLU24	Ciclev10004507m	ATGACAATAGTAACACTGCTTGTATCGGCGACGCAGCTCGCCGGAATCTTAGTGACGGTGACTGTGGCGGCGAACGCCTTCTCTTTTTCGCGTTATCGGAAAAAGAACCTCCTGCCGTTGCGGTCTCCAATTGACGAGTCTGCTGATATTCTGGCCTCCTTCAATGTCGACGCGGAAGGGGAAGATGAGTTTTTCTTCGGATTGGCTACGGCACCAGCACATGTTGAGGACAGACTTAATGATGCTTGGCTTCAGTTTGCAGAAGACGAGCCAAGAAAGAAGTCATATAAGGAGGTTTTGGAACCTGCAGATGCATTAATGGGTGCAGCTGCTGGTGATGTTGGGTCTCAGCAAGCTCCATTACCGAGTAATGAAGTTAATAAGACGAAGAAGAAAAGG…	MTIVTLLVSATQLAGILVTVTVAANAFSFSRYRKKNLLPLRSPIDESADILASFNVDAEGEDEFFFGLATAPAHVEDRLNDAWLQFAEDEPRKKSYKEVLEPADALMGAAAGDVGSQQAPLPSNEVNKTKKKRKPVKLSIEAMIRGFQKYIEVDEGEEVSGENEVPTENEEVHHKVTAWHNVPHPEERLRFWSDPDIELKLAKDTGVSVFRLGIDWSRIMPAEPVNGLKETVNFAALERYKWIINRVRSYGMKVMLTLFHHSLPAWAGEYGGWKLEKTIDYFMDFTRLVVDSVSDIVDYWVTFNEPHVFCMLTYCAGTWPGGNPDMLEVATSALPTGVFNQAMHWMAIAHSKAYDYIHAKSSTSTKSKVGVAHHVSFMRPYGLFDVAAVTLANTLTTFP…	9	566506	571956	1	aCL1136Contig3							Cs9g01790.2	99.7
GH2s endo-β-mannosidase and β-galactosidase
CitGH2.1	Ciclev10000150m	ATGGGAATGTTATCGGCGTCAATAGGGAAGACGAAGCTTGACTCGGGATGGCTCGCCGCGAGATCGACGGAGGTTGGACTCAGTGGGACGCAGCTCACCACGTCTCACCCTCCGACTGGGCCCGCCAAGCCCTGGATGGAGGCTGTAGTCCCGGGAACGGTCTTGGCAACTCTGGTGAAGAACAAAGCGGTGCCTGATCCTTTTTATGGGTTGGAGAATGAGATGATCTTAGACATAGCTGATTCCGGGAGGGAATACTATACATTCTGGTTTTTTACAACCTTTCAGTGTAAGCTGTCAGAGAATCAGCATTTGGATCTGAATTTCCGTGCAATCAACTACTCTGCCGAAGTTTACTTGAATGGCCAGAAAAGGGTCCTCCAGAAAGGAATGTTTCGA…	MGMLSASIGKTKLDSGWLAARSTEVGLSGTQLTTSHPPTGPAKPWMEAVVPGTVLATLVKNKAVPDPFYGLENEMILDIADSGREYYTFWFFTTFQCKLSENQHLDLNFRAINYSAEVYLNGQKRVLQKGMFRRHSLDVTDILHPDGQNLLAVLVHPPDHPGTIPPEGGQGGDHEIGKDVATQYVEGWDWIAPIRDRNTGIWDEVSISVTGPVKIIDPHLVSSFCQPVKIIDPHLVSSFFDNYTRVYLHASTELENRSTWVAECSLSIQVTTDLEGGVCLVEHLQTQHLSISPGAHVQYTFPQLFFYKPNLWWPNGMGKQSLYTVRISVDVKGYGESDLWSHLFGFRKIESHIDNATGGRLFKVNGQPIFIRGGNWILSDGLLRLSKKRYKTDIKFHAD…	5	32939571	32945214	-1	aCL4388Contig1							Cs3g13860.1	98.5
CitGH2.2	Ciclev10027821m	ATGGTTGGAGTGGAAATAGATTGCTCCCCAGAAATCTCTAAAGACAGTATCCTTGCCAACTTTGTCATTGAAGCTGGATTATATGATACTGGAAACTGGTATAACTGTGATGGATGCATTGATCTACTTTCATCTAAGGTGGCTAACATACAGCTCAACCCCTCTACTGCAAGTGTCGAATTTCCTGGTTACACGCTTGTGGGAAAACTGGAAATGCCCAGGCTATGGTCTGCGGAGCAACCAAATTTGTACACGCTAGTTGTCATCCTAAAACATGCATCTGGCCCTGTCGTTGACTGTGAATCATGTCTTGTTGGCATACGACAAGTATCAAAAGCCCCAAAACAACTACTTGTTAATGGCAATCCAGTGGTCATAAGAGGTGTGAATAGGCATGAG…	MVGVEIDCSPEISKDSILANFVIEAGLYDTGNWYNCDGCIDLLSSKVANIQLNPSTASVEFPGYTLVGKLEMPRLWSAEQPNLYTLVVILKHASGPVVDCESCLVGIRQVSKAPKQLLVNGNPVVIRGVNRHEHHPRVGKTNIESCMVKDLVLMKQNNINAVRNSHYPQHPRWYELCDLFGLYMIDEANIETHGFNFSEHFKHPTMEPSWAAAMMDRVIGMVERDKNHASIICWSLGNEAGHGPNHSAAAGWIRGKDPSRLLHYEGGGSRTPSTDIVCPMYMRVWDIVMIAKDPTETRPLILCEYSHAMGNSNGNIHEYWEAIDSTFGLQGGFIWDWVDQGLLRELADGTKHWAYGGDFGDTPNDLNFCLNGLLWPDRTPHPALHEVKYVYQAINVSLK…	8	14372264	14380447	1	aCL4443Contig1	ATGGCTTCTCTAGTCGGACAACTTCCGTTTGCTTTAGAAAATGCAAATGGGTATAAAGTTTGGGAAGATCCGTCCTTCATCAAGTGGAGAAAAAGGGACCCTCATGTTACTTTGCGTTGCCATGACTCTGTCGAAGGTTCTCTTAAATATTGGTATGAACGCAATAAAGTGGATATTTCAGTGTCCAATTCTGCTGTTTGGGATGATGATGCTGTTCATGAAGCTCTCACTAGTGCTGCCTTTTGGACAAATGGCTTGCCTTTTGTCAAGTCTTTATCTGGTCACTGGAAATTTTTCTTGGCTTCAAGTCCTCCCGATGTTCCTCTGAATTTTCATAAAAGTTCATTTCAGGATTCCAAGTGGGAAGCTATACCCGTTCCTTCAAATTGGCAGATGCAT…	MASLVGQLPFALENANGYKVWEDPSFIKWRKRDPHVTLRCHDSVEGSLKYWYERNKVDISVSNSAVWDDDAVHEALTSAAFWTNGLPFVKSLSGHWKFFLASSPPDVPLNFHKSSFQDSKWEAIPVPSNWQMHGFDRPIYTNVVYPFPLDPPNVPAENPTGCYRTYFHIPKEWQGRRIFLHFEAVDSAFCAWINGVPVGYSQDSRLPAEFEISDYCYPHGSDKKNVLAVQVFRWSDGSYLEDQDHWWLSGIHRDVLLLAKPQVFIADYFFKSNLAEDFSLADIQVGVEIDCSPEISKDSILANFVIEAGLYDTGNWYNCDGCIDLLSSKVANIQLNPSTASVEFPGYTLVGKLEMPRLWSAEQPNLYTLVVILKHASGPVVDCESCLVGIRQVSKAPKQ…	8	14355774	14380447	1	Cs8g12140.1	75.4
GH3s β-xylosidases
CitBXL1	Ciclev10014537m	ATGAAAACGGTAAGGATATTGATGCGCGCGGTTTTGTTGGGCATGGTTTCTTTGTTAAGCTTTGCAAATGCAGAGTATGCCAAGTACAAAGATCCCAAGCAGCCAGTGGCTGTGCGGGTTAAGGACTTGTTGGGTAGAATGTCACTTGAAGAAAAGATTGGTCAGATGGTTCAGATTGATAGAACCATTGCCACTGTTCAGTTTTTGAAAGATTACTCCATTGGGAGTGTGTTGAGTGGTGGGGGAAGCACGCCGCTTCCGCAGGCCAGTGCTGCAGATTGGATCAATATGATAAATGATTTTCAAAGGGGGTCTCTTGCCAGTCGTTTGGGGATTCCAATGATCTATGGCATTGATGCTGTTCATGGCCACAACAATGTCTATAATGCTACTATTTTC…	MKTVRILMRAVLLGMVSLLSFANAEYAKYKDPKQPVAVRVKDLLGRMSLEEKIGQMVQIDRTIATVQFLKDYSIGSVLSGGGSTPLPQASAADWINMINDFQRGSLASRLGIPMIYGIDAVHGHNNVYNATIFPHNVGLGATRDPELVKRIGAATALEVRATGIPYVFAPCIAVCRDPRWGRCYESYSEDHKIVQEMTDVILGLQGDPPSNLRKGVPYVGGKDKVAACAKHFVGDGGTTNGINENNTVIDMHGLLSIHMPAYSDSIIKGVSTIMVSYSSWNGEKMHANRELVTGFLKGTLKFKGFVISDWQGIDRITSPPHSNYTYSVQAGIQAGIDMVMIPFNLTEFIDDLTDLVKNNVITMDRIDDAVGRILLVKFSMGLFENPLADLSLVNELGSQ…	2	691427	698055	-1	aCL6096Contig1							Cs7g23860.1	100
CitBXL2	Ciclev10017853m	ATGAAGACGAAAAGAAGTTTGATTCCCTTAGTGGGAATTCTGTTTTGGTGTTGCTGTGGCTTGCTGGTCGATGGGAATGATGGTCCAATGATATACAAAGATCCAAAGCAGCCAGTGGAGGTTAGGGTGAAGGACTTATTGAGCAGAATGACTCTTGGGGAGAAGATTGGGCAGATGACCCAAATTGAAAGGGTTAATGCCACTTTTGATGCGATGAAGAATTACTTCATCGGAAGTGTTTTGAGCGGCGGAGGGAGTGTGCCATCTCCAAATGCAACAGCGCAGCAATGGATTGATATGGTTAATGATATTCAGAGAGGAGCTATGGCAACACGTCTTGGCATCCCAATGATTTATGGAGTTGATGCTGTTCATGGACACAACAACGTGTATAAAGCT…	MKTKRSLIPLVGILFWCCCGLLVDGNDGPMIYKDPKQPVEVRVKDLLSRMTLGEKIGQMTQIERVNATFDAMKNYFIGSVLSGGGSVPSPNATAQQWIDMVNDIQRGAMATRLGIPMIYGVDAVHGHNNVYKATIFPHNVGLGATRDPNLVKRIGAATALEVRATGIPYAFAPCIAVCRDPRWGRCYESYSEDAKLVQQFSVIISGLQGDAPSKQVKKGRPFVGGKDKVAACAKHYVGDGGTVNGINENNTIVTTEQLFDIHMPPYWSALDQRVSTVMISYSSINGKKMHANKELVTEYLKEKLKFKGFTISDWEGIDRITSPPHSNYTYSVQESVLAGLDMIMVPYLYPEFINILTDLVNKKVIPMRRINDAVKRILRVKFEMGLFENPYADNSFVNK…	2	742039	744165	-1								Cs7g23900.1	55.9
CitBXL3	Ciclev10018271m	ATGATATACAAAGATCCAAAGCAGCCAGTGGAGGTTAGGGTGAAGGACTTATTGAGCAGAATGACTCTTGCGGAGAAGATTGGGCAGATGACCCAAATTGAAAGGGTTAATGCCACTTTTGATGCGATGAAGAATTACTTCATCGGAAGTGTTTTGAGCGGCGGAGGGAGTGTGCCATCTCCAAATGCAACAGCGCAGCAATGGATTGATATGGTTAATGATATTCAGAGAGGAGCTATGGCAACACGTCTTGGCATCCCAATGATTTATGGAGTTGATGCTGTTCATGGACACAACAACGTGTATAAAGCTACAATTTTCCCACATAATGTCGGCCTTGGAGCCACCAGAGATCCTAATCTTGTTAAGAGAATTGGTGCTGCAACTGCACTTGAAGTT…	MIYKDPKQPVEVRVKDLLSRMTLAEKIGQMTQIERVNATFDAMKNYFIGSVLSGGGSVPSPNATAQQWIDMVNDIQRGAMATRLGIPMIYGVDAVHGHNNVYKATIFPHNVGLGATRDPNLVKRIGAATALEVRATGIPYAFAPCIAVCRDPRWGRCYESYSEDAKLVQQFSVIISGLQGDAPSKQVKKGRPFVGGKDKVAACAKHYVGDGGTVNGINENNTIVTTEQLFDIHMPPYWSALDQRVSTVMISYSSINGKKMHANKELVTEYLKERLKFKGFTISDWEGIDRITSPPHSNYTYSVQESVLAGLDMIMVPYLYPEFINILTDLVNKKVIPMRRINDAVKRILRVKFEMGLFENPYADNSFVNKLGCKEHRELAREAVRKSLVLLKNGKQQSP…	2	777114	779235	1	Phytozome v10.2|FGENESH|C. sinensis	ATGAAGACGAAAAGAAGTTTGATTCCCTTAGTGGGAATTCTGTTTTGGTGTTGCTGTGGCTTGCTGGTCGATGGGAATGATGGTCCAATGATATACAAAGATCCAAAGCAGCCAGTGGAGGTTAGGGTGAAGGACTTATTGAGCAGAATGACTCTTGCGGAGAAGATTGGGCAGATGACCCAAATTGAAAGGGTTAATGCCACTTTTGATGCGATGAAGAATTACTTCATCGGAAGTGTTTTGAGCGGCGGAGGGAGTGTGCCATCTCCAAATGCAACAGCGCAGCAATGGATTGATATGGTTAATGATATTCAGAGAGGAGCTATGGCAACACGTCTTGGCATCCCAATGATTTATGGAGTTGATGCTGTTCATGGACACAACAACGTGTATAAAGCT…	MKTKRSLIPLVGILFWCCCGLLVDGNDGPMIYKDPKQPVEVRVKDLLSRMTLAEKIGQMTQIERVNATFDAMKNYFIGSVLSGGGSVPSPNATAQQWIDMVNDIQRGAMATRLGIPMIYGVDAVHGHNNVYKATIFPHNVGLGATRDPNLVKRIGAATALEVRATGIPYAFAPCIAVCRDPRWGRCYESYSEDAKLVQQFSVIISGLQGDAPSKQVKKGRPFVGGKDKVAACAKHYVGDGGTVNGINENNTIVTTEQLFDIHMPPYWSALDQRVSTVMISYSSINGKKMHANKELVTEYLKERLKFKGFTISDWEGIDRITSPPHSNYTYSVQESVLAGLDMIMVPYLYPEFINILTDLVNKKVIPMRRINDAVKRILRVKFEMGLFENPYADNSFVNK…	2	777027	779235	1	Cs7g23950.1	95.4
CitBXL4	Ciclev10018262m	ATGGCCAAAGTTGTTAGTTTCCTCATATGCTTCAGTCTCTCCATTGCTTTACTTGTCTTCTCGACAAACGCTGTTAATGCAAATGACAGCAGTAGCCCTGTCTATGTTTGTGACCCTGCTCGATTCACTAAACTTGGATTGCAAATGTCAAGCTTTCTCTTCTGTGATTCATCTTTACCCTATTCCGTAAGAGTGAAGGACTTGGTGAGCCGAATGACCCTTGATGAAAAGGTGCAGCAACTCGGAGATTTTGCTCACGGCGTCCCAAGGCTGGGGCTTCCGCAGTACGAGTGGTGGTCCGAGGCACTCCATGGAGTGTCTAATGTCGGTCCCGGCACTCATTTCGATGATGTAGTTCCTGGAGCGACAAGTTTTCCCACTGTTATCCTCACAACAGCT…	MAKVVSFLICFSLSIALLVFSTNAVNANDSSSPVYVCDPARFTKLGLQMSSFLFCDSSLPYSVRVKDLVSRMTLDEKVQQLGDFAHGVPRLGLPQYEWWSEALHGVSNVGPGTHFDDVVPGATSFPTVILTTASFNESLWKKIGRAVSTEARAMYNLGRAGLTYWSPNINVARDPRWGRITETPGEDPFVVGRYAVNYVRGLQDVEGHENATDLNSRPLKVSSCCKHYAAYDVDNWKGVDRYHFDARVTEQDMEETFLRPFEMCVKEGDASSVMCSYNRVNGIPSCADPKLLNQTVRGEWDLHGYIVADCDSIQVMVDNHKFLADSKEDAVAQTLKAGLDLDCGQYYTNFTGNAVQQGKVKETDIDKSLKYLYTVLMRLGFFDGSPQYVSLGKKDICSD…	2	29821622	29824705	-1								Cs2g11630.1	99
CitBXL5	Ciclev10014325m	ATGGCAAAAGTAGTTAGTTCTCTCCTATGCTTGATCAGTCTCTCCATTGCTTTACTTGTCTTCTCTACGAACGCTGTTGATGCGAATGGCAGCAGTAGCCCTGTCTTCGTTTGTGACCCCGGTCGGTTCTCTAAACTTGGACTGCAAATGTCAAGCTTTCTCTTCTGTGACTCATCTTTACCCTACTCCATAAGAGTGAAGGACTTGGTGAGCCGAATGACCCTTGACGAAAAAGTGCAGCAACTCGGAGATTTTGCTCACGGCGTCCCAAGGTTGGGGCTTCCGCAGTACGAGTGGTGGTCCGAGGCACTCCATGGAGTGTCTAATGTCGGTCCCGGCACTCATTTCGATGATGTAGTTCCTGGAGCGACAAGTTTTCCCACTGTCATCCTCACAACA…	MAKVVSSLLCLISLSIALLVFSTNAVDANGSSSPVFVCDPGRFSKLGLQMSSFLFCDSSLPYSIRVKDLVSRMTLDEKVQQLGDFAHGVPRLGLPQYEWWSEALHGVSNVGPGTHFDDVVPGATSFPTVILTTASFNESLWKKIGRAVSTEARAMYNLGRGGLTYWSPNINVARDPRWGRITETPGEDPFVVGRYAVNYVRGLQDVEGHENATDLNSRPLKVSSCCKHYAAYDVDNWKGVDRYHFDARVTEQDMEETFLRPFEMCVKEGDASSVMCSYNRVNGIPSCADPKLLNQTVRGEWDLHGYIVADCDSIQVMVDNHKFLSDSKEDAVAQTLKAGLDLDCGQYYTNFTGNAVQQGKVKETDIDKSLKYLYTVLMRLGFFDGSPQYVSLGKQDICS…	2	29826465	29829544	1								Cs2g11630.1	99.5
CitBXL6	Ciclev10017977m	AGTAACTTCACTTATGTATGCGACCCAAAAAGGCTTGATGATCTGGGATTGGAAATGTCATCATTTTCATTCTGCGATTCATCGCTTCCTTATCCTGTTAGGGTTAAGGATTTGGTGGACAGAATGACGATAGACGAAAAAGTGTTGCAATTAGGAAACCATGGTAAAGGAGTGCAGAGATTGGGTTTGCCTAAGTATGAGTGGTGGTCCGAAGCACTTCATGGCGTCTCCAATGTGGGTCCAGGAACATATTTCGATGATCTCGTCCCCGGTGCAACAAGTTTTCCAACAGTCATTCTTACAACAGCGTCCTTCAATGAGTCATTGTGGAAAACCATTGGCCAGGCTGTTTCGACAGAAGCAAGAGCCATGTACAATCTAGGGCGTGCTGGATTGACA…	SNFTYVCDPKRLDDLGLEMSSFSFCDSSLPYPVRVKDLVDRMTIDEKVLQLGNHGKGVQRLGLPKYEWWSEALHGVSNVGPGTYFDDLVPGATSFPTVILTTASFNESLWKTIGQAVSTEARAMYNLGRAGLTFWSPTINVLRDPRWGRATETPGEDPFIVGKYAANYVRGLQDVEGHDNYTDPNSRPLKVSSCCKHYAAYDVDNWSGVDRFHFDARVTEQDMVETFLRPFEMCVKEGDASSIMCSYNRVNGIPTCADPKLLNQTVRGEWDLHGTLKAGLDLDCGDYYPDFTGSAFRQGKVREADVDKSLKYLYTVLMRLGWFDGHPQYKSLGKADVCADEHIELAADAARQGIVLLKNDNDTLPLSTSKFRNLAVVGPHANATSAMLGNYAGAPCRYR…	2	34942463	34945203	-1	FGENESH	ATGGCTAAAGTTCTGAATTTTCTTCTCGGCATCAGTCTCTCCATTCTTCTTCTTAATGTTTGCGCTAATGGGAGAGCAGTTGTTAACAATGCATCAACATTAAGTGAGGACGATGCTACTCCAAAAGGCAGTAACTTCACTTATGTATGCGACCCAAAAAGGCTTGATGATCTGGGATTGGAAATGTCATCATTTTCATTCTGCGATTCATCGCTTCCTTATCCTGTTAGGGTTAAGGATTTGGTGGACAGAATGACGATAGACGAAAAAGTGTTGCAATTAGGAAACCATGGTAAAGGAGTGCAGAGATTGGGTTTGCCTAAGTATGAGTGGTGGTCCGAAGCACTTCATGGCGTCTCCAATGTGGGTCCAGGAACATATTTCGATGATCTCGTCCCC…	MAKVLNFLLGISLSILLLNVCANGRAVVNNASTLSEDDATPKGSNFTYVCDPKRLDDLGLEMSSFSFCDSSLPYPVRVKDLVDRMTIDEKVLQLGNHGKGVQRLGLPKYEWWSEALHGVSNVGPGTYFDDLVPGATSFPTVILTTASFNESLWKTIGQAVSTEARAMYNLGRAGLTFWSPTINVLRDPRWGRATETPGEDPFIVGKYAANYVRGLQDVEGHDNYTDPNSRPLKVSSCCKHYAAYDVDNWSGVDRFHFDARVTEQDMVETFLRPFEMCVKEGDASSIMCSYNRVNGIPTCADPKLLNQTVRGEWDLHGYIVSDCDSIEVMVDDHKFLGDTREDAVARTLKAGLDLDCGDYYPDFTGSAFRQGKVREADVDKSLKYLYTVLMRLGWFDGHP…	2	34942463	34945332	-1	Cs2g03690.1	99.4
CitBXL7								Phytozome v10.2|FGENESH	ATGGCACATAGCCAACCAACACAATTAACTTATGTAACAGCTAGCACTAAACCCGCAACAAGTAGCAAAAATAGCTTCACCGCCTATGTGCGTGATCCCAAAAGATTTGCAGCTATTCAGTTGAAAATTTCGGACTTTGTCTTCTGTGATGTATCACTTGCTTTTCCTATTAGGGCGAAGGATTTGATATACAGAATGACACTAGATGAAAAATTGCGGCAGCTAGGAGATCTTGCTTATGTGGTACCGCGGCTGGGGCTGCATGTATATGGCTGTCTCAACAGAAGCAAGAGCAATGCACAATTTAGGACACGCTGGATTAACATTTTGGATCCAAACATTAACGTTGTAACTTATCCTAGATGGGGAAGAACACTGGAGACAGCTGGCAAAGATCCT…	MAHSQPTQLTYVTASTKPATSSKNSFTAYVRDPKRFAAIQLKISDFVFCDVSLAFPIRAKDLIYRMTLDEKLRQLGDLAYVVPRLGLHVYGCLNRSKSNAQFRTRWINILDPNINVVTYPRWGRTLETAGKDPFSVGRYAVNCVSGLQDVGGQENATEFRTLDLLKYMASDCDSIEVIVDNQKFPNDTKEDAVAQTPKAGLDLDCGDYYTNFTVSAMQQGRIKETDIDTSLIIEVPLYFVNEARLGNLNYSFPCNNNSFMHQAIEAAKNAEATIIFAGLDLTIEAESLDRENPTLPGYQTQLINQVADAAKGPVTIVIMSAGGVDISFAKSNSKIKSILWAGYRGEQGGRLPVTWYKADYVNKLPMSSMPLRPVDSEGYTQFKYSLTFYAFPVDIKLDK…	2	34946592	34950813	-1	¾	¾
CitBXL8	Ciclev10018058m	CCCGACAACAAAACTTTCACTTACGTGTGTGACCCTGCAAGGTTTGCCGAACTTAAATTGAAATTGTCGGACTTTACATTTTGTGATGCAAAGCTTCCTTACCCAGTTAGGGCGAAGGATTTGGTGGACAGAATGACTCTGGCTGAAAAAGTGCAGCAGCTCGGAGATCTTGCTTATGGCGTGCCTAGATTGGGACTTCCCCTGTACGAATGGTGGTCCGAGGCACTTCACGGCGTCTCCTATATTGGTCGCAGAACAAACACTCCTCCAGGCACACATTTTGACAGTGAAGTTCCTGGCGCTACAAGTTTTCCAACTGTTATTCTCACAACAGCCTCGTTCAACGAGTCATTATGGAAGAAGATTGGCCAGACAGTGTCGACAGAAGCAAGAGCTATG…	PDNKTFTYVCDPARFAELKLKLSDFTFCDAKLPYPVRAKDLVDRMTLAEKVQQLGDLAYGVPRLGLPLYEWWSEALHGVSYIGRRTNTPPGTHFDSEVPGATSFPTVILTTASFNESLWKKIGQTVSTEARAMHNLGNAGLTFWSPNINVVRDPRWGRVMETPGEDPFVVGRYSVNYVRGLQDVEGQENTADLSTRPLKVSACCKHYAAYDLDNWKGVDRFHFDSKVTEQDMIETFNLPFEMCVREGDASSVMCSYNRVNGIPTCADSKLLNQTIRGDWNLHGYIVSDCDSIQTIVESHKFLNDTKEEAVARVLKAGLDLDCGDYYTNFTVGAVQQGKVRETDIDRSLRFLYVVLMRLGYFDGSPQYKSLGKNDICNPQHIELAAEAAAQGIVLLKNDN…	2	34953134	34955870	-1	Phytozome v10.2|FGENESH	ATGGCAAGAATTTCAAATTTCATATTATGTTTTAGCATATGCGTTTCATTTCTTGTAATTTCTACTAATGCAGCACCCGACAACAAAACTTTCACTTACGTGTGTGACCCTGCAAGGTTTGCCGAACTTAAATTGAAATTGTCGGACTTTACATTTTGTGATGCAAAGCTTCCTTACCCAGTTAGGGCGAAGGATTTGGTGGACAGAATGACTCTGGCTGAAAAAGTGCAGCAGCTCGGAGATCTTGCTTATGGCGTGCCTAGATTGGGACTTCCCCTGTACGAATGGTGGTCCGAGGCACTTCACGGCGTCTCCTATATTGGTCGCAGAACAAACACTCCTCCAGGCACACATTTTGACAGTGAAGTTCCTGGCGCTACAAGTTTTCCAACTGTTATT…	MARISNFILCFSICVSFLVISTNAAPDNKTFTYVCDPARFAELKLKLSDFTFCDAKLPYPVRAKDLVDRMTLAEKVQQLGDLAYGVPRLGLPLYEWWSEALHGVSYIGRRTNTPPGTHFDSEVPGATSFPTVILTTASFNESLWKKIGQTVSTEARAMHNLGNAGLTFWSPNINVVRDPRWGRVMETPGEDPFVVGRYSVNYVRGLQDVEGQENTADLSTRPLKVSACCKHYAAYDLDNWKGVDRFHFDSKVTEQDMIETFNLPFEMCVREGDASSVMCSYNRVNGIPTCADSKLLNQTIRGDWNLHGYIVSDCDSIQTIVESHKFLNDTKEEAVARVLKAGLDLDCGDYYTNFTVGAVQQGKVRETDIDRSLRFLYVVLMRLGYFDGSPQYKSLGKND…	2	34953134	34955945	-1	Cs2g03680.1	65.9
CitBXL9	Ciclev10014315m	ATGTCCAAAGTTGTAACAGTCAGTTTTCTGATAATAATATGCATCACTTGTATTGAAATTGGTAGTGATGCTCAACCTCAACCAATTACTGGAATCAAAAAAACTCCCTTCACCTATATATGTGACCCAGCGAGGTTCGAATCAATTAAAGTGAAGCTGTCGGACTTTCCCTACTGTGATGCAAAGCTTCCGTATCCTGAAAGAGCCAAGGATTTGGTGGAGAGGATGACATTACCTGAAAAAGTGCAACAAATGGGAGATCTTGCTTACGGCGTCCCTAGATTGGGACTGCCCCTGTATGAGTGGTGGTCTGAGGCACTTCACGGCGTCTCCTTTATTGGTCGTAGAACAAACTCTCCTCCAGGCACACATTTTGACAGTGAAGTTCCTGGCGCTACA…	MSKVVTVSFLIIICITCIEIGSDAQPQPITGIKKTPFTYICDPARFESIKVKLSDFPYCDAKLPYPERAKDLVERMTLPEKVQQMGDLAYGVPRLGLPLYEWWSEALHGVSFIGRRTNSPPGTHFDSEVPGATSFPTVILTTASFNESLWKKIGQTVSTEARAMYNLGNAGLTFWSPNINVVRDPRWGRVLETPGEDPYVVGRYAINYVRGLQDVEGVEYHRDSDSRPLKISACCKHYAAYDLDNWEGNDRFHFDSRVTEQDMQETFILPFEMCVNEGDVSSVMCSYNRVNGIPTCADPKLLNQTIRGDWNFHGYIVSDCDSIQTIVESHKFLNDTKEDAVARVLKAGLDLDCGDYYTNFTMGAVQQGKIAEADIDTSLRFLYIVLMRLGYFDGSPQYK…	2	34957319	34960394	-1								Cs2g03670.1	99.8
CitBXL10	Ciclev10019305m	ATGGGGCTTCTGCTCTTGTGTTGCTTGGCAGAAGCAGAATACCTGAAATATAAAGATCCCAAGCAGCCATTACATGTCCGAGTGAACGATCTGGTTAGCAGGATGACTTTGGAGGAAAAGATAGGCCAAATGACACAGATTGAACGTGGTGTTGCTTCAGCTGAGGTGATGAAGAAATACTTCATAGGGAGTGTTTTGACTGGAGGAGGGAGTGCTCCGGCAAGACAGGCTTCTGCTGAGGCTTGGATTAACATAATCAATGATTTTCAGAAGGGTGCTTTATCCACGCGACTTGGGATTCCAATGATTTATGGGATTGATGCTGTTCATGGTCATAACAATGTTTACAACGCTACAATTTTTCCTCACAATATAGGCCTTGGAGCTACAAGGGACCCC…	MGLLLLCCLAEAEYLKYKDPKQPLHVRVNDLVSRMTLEEKIGQMTQIERGVASAEVMKKYFIGSVLTGGGSAPARQASAEAWINIINDFQKGALSTRLGIPMIYGIDAVHGHNNVYNATIFPHNIGLGATRDPDLVKRIGAATALEVRATGIPYTFAPCIAVCRDPRWGRCYESYSEDPKIVQAMTELIPGLQGDIPAGSPKGVPYVAGKTKVAACAKHFVGDGGTINGVNENNTIIDRHGLLAIHMPAYYNSIIKGVSTVMVSYSSWNGIKMHANQELVTGFLKNTLQFRGFVITDWEGLDRITSPPHANYSYSVEVGIKAGIDMVMVPYNYIEFIDDLTFQVKNNIIPMSRIDDAVRRILRVKFVMGLFENPLADDSLVDQLGSQEHRELAREAVRK…	3	41513567	41516390	-1	aC18012G12Rv_c|aC18011D12Rv_c							Cs5g26860.1	97.8
CitBXL11	Ciclev10018959m	ATGGCTTCCACCATTGCTTTCTTTTTTCTTGGGCTCATTCTCTTGAGTGCTTCTAGTTCTGGCTTAGCAGCCCGGGAGCCATTTGCATGCGACCCAAAAGATGCAACGACAAGAACGTTGCCGTTCTGTCAAGTTTCTTTGCCGATCCCGCAGAGAGTGAATGACCTCATTGGGAGGCTGAGTTTGCAAGAGAAGGTTAAGCTGCTGATAAGCGGTGCAGCAGCGGTTCCGCGGCTTGGAATCAAAGGATATGAATGGTGGTCTGAGGCTCTTCATGGAGTTTCAAATGTGGGCCCTGGAACTAAGTTTGGTGGGGACTTCCCCGGGGCCACCAGCTTCCCTCAAGTCATCACAACCGCTTCTTCTTTCAATGCAACCTTGTGGGAAGCCATCGGACGG…	MASTIAFFFLGLILLSASSSGLAAREPFACDPKDATTRTLPFCQVSLPIPQRVNDLIGRLSLQEKVKLLISGAAAVPRLGIKGYEWWSEALHGVSNVGPGTKFGGDFPGATSFPQVITTASSFNATLWEAIGRVVSDEARAMYNGGTAGLTYWSPNVNIFRDPRWGRGQETPGEDPVLSGKYAASYVRGLQGSDGDRLKVAASCKHFTAYDLDNWNGVDRFHFNAKVSKQDIEDTFDVPFRMCVMEGKVASVMCSYNQVNGVPTCADPNILKRTIRGEWRLNGYIVSDCDSVGVYYDTQHFTSTPEEAAADAIRAGLDLDCGPFLGLHTESAVQRGLLSEIDINNALVNTLTVQMRLGMFDGEPSSQPYGHLGPKDVCTPDHQELALEAARQGIVLLKN…	3	46357700	46364094	-1	aCL2321Contig1							orange1.1t01658.1	81.7
CitBXL12	Ciclev10000355m	ATGGCTCCAGCTCAAAACAGAAACAGAGCACCGAAGGTCTCTGTTTTGTTCTTGTTTCTGACTTATTGTTCTTTACAACATTCATCATCATCAGCTCAATCATCACCAGTTTTTGCCTGTGATGTCGTGAGCAATCCGTCTTTGGCGAGTCTGGGGTTCTGTAACACATCGTTAGGGATTGATTTGAGAGTTGGAGACTTGGTGAAGAGACTCACGTTGCAAGAGAAAATCACTTTCTTGGTGGATAGTGCAGGGAGTGTGAGTAGGCTTGGGATACCAAAATATGAGTGGTGGTCCGAGGCTTTACATGGTGTCTCTTACGTCGGTCCAGGTACTCATTTTTCCAATGTCGTTCCTGGAGCTACAAGCTTCCCTCAGGTTATTCTCACCGCCGCTTCC…	MAPAQNRNRAPKVSVLFLFLTYCSLQHSSSSAQSSPVFACDVVSNPSLASLGFCNTSLGIDLRVGDLVKRLTLQEKITFLVDSAGSVSRLGIPKYEWWSEALHGVSYVGPGTHFSNVVPGATSFPQVILTAASFNASLFQAIGKVVSTEARAMYNVGLAGLTFWSPNINIFRDPRWGRGQETPGEDPLLASKYATGYVKGLQQTDGGSPNRLKVAACCKHYTAYDLDNWKGTDRYHFNAMVTKQDLDDTFQPPFKSCVIDGNVASVMCSYNQVNGKPTCADPDLLAGVIRGQWKLNGYIVSDCDSVDVLYNSQHYTKTPEEAAAKSILAGLDLNCGSFLGKHTEAAVKAGLVNESAIDNAISNNFATLMRLGFFDGHPSKQPYGQLGPKDVCTQANQDL…	5	22306732	22309822	-1	aKN0AAQ3YF14RM1_c							orange1.1t02681.1	99.4
CitBXL13	Ciclev10000352m	ATGATATTCCACAAGCTCTCTCTTGTTTTTCCTCTTCTTTGTCTCTGCTTCACTTCACTCCTCACCCGAGTTGACTCAACTCAGCCTCCATTCTCATGTGACCCGTCGAACCCATCGACCGAAACCTTCCCTTTTTGCAAAACCACGCTGCCCATAAGCCAGAGAGCCAGGGACTTGGTCTCCAGACTCACACTAGATGAAAAAATCTCCCAACTCGTTAACTCAGCTCCAGCTATTCCCCGACTCGGTATCCCGGCGTATGAGTGGTGGTCCGAGGCATTACACGGCGTCGCCGGTGTCGGGAAAGGCATCTTCTTCAATGGAACCATTAGAGGCGCCACTAGCTTCCCTCAAGTCATCCTCACCGCAGCTTCCTTTGATAGTTACTTGTGGTACCGC…	MIFHKLSLVFPLLCLCFTSLLTRVDSTQPPFSCDPSNPSTETFPFCKTTLPISQRARDLVSRLTLDEKISQLVNSAPAIPRLGIPAYEWWSEALHGVAGVGKGIFFNGTIRGATSFPQVILTAASFDSYLWYRIGQAIGLEARALYNAGQAIGMTFWAPNINIFRDPRWGRGQETPGEDPLVTGKYAVSYVRGVQGDTFNGGKLKGKLQASACCKHFTAYDLDNWKGTTRYKFDARVTMQDLADTYQPPFESCVKQGRASGIMCAYNRVNGIPSCADRNLLSKTARRLWGFHGYITSDCDAVSIIYDAEGYAKSPEDAVVDVLKAGMDVNCGSFLQKHTKAAVKQKKLPESEIDRALHNLFSVRMRLGLFNGNPTMQPFGKIGADVVCSPAHQVLALQA…	5	36588687	36592786	1	aCL3345Contig1							Cs3g18490.1	99.6
CitBXL14	Ciclev10024911m	ATGAGTCGACCATTCATGTCAATCCAACTAAGAGAAAGAATCCTCTTCCGCGTTCTACAACTCTTTGTCCTAGTCAACGTCATCGCCTTCTCCAACTCAAAACCAGTCTTAAATAAACCGGACTTCCCATGCAAGCCGCCGCATTTTGACTCATGCCCATTTTGCAACACCTCTCTGTCAATCAGCACGAGGGCCAAGTCTCTCATATCTCTACTCACTCTCCAAGAAAAGATCCAACAACTTTCTGATAATGCCTCGGCCATTCCAAGACTTGGCATTCCTGCCTACGAATGGTGGTCTGAGTCACTTCATGGGATTGCCTCCAATGGCCCTGGTGTCAACTTCAATGGAACTGTGTCATCTGTCACCAGTTTCCCTCAAGTTCTCGTCTCTGCAGCT…	MSRPFMSIQLRERILFRVLQLFVLVNVIAFSNSKPVLNKPDFPCKPPHFDSCPFCNTSLSISTRAKSLISLLTLQEKIQQLSDNASAIPRLGIPAYEWWSESLHGIASNGPGVNFNGTVSSVTSFPQVLVSAASFNRSLWSNIGSAVAVEARAMYNLGQAGLTFWAPNINIFRDPRWGRGQETPGEDPMVVSAYAVEFVKSFQGENWKSDDGGIGFGFREKRVLKGFGEESDRGDELMLSACCKHLIAYDLEKWGNFSRYSFNAMITEQDTEDTFQPPFRSCIEQGKASCIMCSYNQVNGVPACLRGDLFQKARNEWGFKGYITSDCDAVATIFEYQNYTKTHEDSAAGVLKAGMDINCGTCMLRHTQSAIDKGKVQEKDIDRALLNLFSVQLRLGLFN…	7	4805545	4809377	1	aKN0AAP13YM19FM1_c							Cs1g20830.1	99.8
CitBXL15	Ciclev10027856m	ATGAAACCCCAATATCACTTATCGCTTTGCCTTGCAATACTCCTCTTATTAACAACCCAATGTACCCCTCAACAATTTGCATGTGACAAGAGCAAGTCAGAAACAAGCCAGTTCCCATTTTGCAACTCCTCATTAACTTATGAGGACCGAGCCAAGAACCTAGTTTCACTCTTAACTCTGAAAGAAAAGGTGCAACAATTAGTAAACACAGCCACAGGCATTCCCAGGCTCGGCGTGCCATCCTACGAATGGTGGGGCGAGGCGCTACACGGCGTCTCAAACGTTGGACCCGCTGTGCGTTTTAATGCCACGGTGCCCGGTGCGACAAGCTTCCCAGCTGTAATTTTATCAGCTGCTAGTTTTAATGCAAGTTTGTGGCTCAAGATGGGGCAAGTGGTG…	MKPQYHLSLCLAILLLLTTQCTPQQFACDKSKSETSQFPFCNSSLTYEDRAKNLVSLLTLKEKVQQLVNTATGIPRLGVPSYEWWGEALHGVSNVGPAVRFNATVPGATSFPAVILSAASFNASLWLKMGQVVSTEARAMYNVGQAGLTYWSPNVNVFRDPRWGRGQETPGEDPLVVSKYAVNYVRGLQEIGDSKNSSSDRLKVSSCCKHYTAYDVDNWKGVDRFHFDAKVTKQDLEDTYQPPFKSCVQEGHVSSVMCSYNRVNGIPTCADPNLLKGVVRDQWGLDGYIVSDCDSIQVYDTAIRYTATPEDAVALALNAGLNMNCGDYLGKYTENAVNMSKVKESVVDQALIYNYIVLMRLGFFDGDPKSQPLGNLGPSDVCTDDHKSLALDAARQGIV…	8	6659340	6662205	-1	aC20003A03SK_c							Cs8g08680.1	99.6
CitBXL16	Ciclev10028018m	ATGGGGAGATTTTCAGTACCCATGTTGGGGTTTCTGCTGTTATGCTTCTTGGCAGCGGTTACAGAAGCCACTTACATCAAATACAAGGACCCAAAACAGCCATTGGGTGCTAGGATCAGGGACTTGATGAGCAGAATGACTCTAGCTGAAAAGATTGGCCAGATGACTCAGATCGAGCGCGCTGTTGCTACCCCAGATGTTATGAAGCAGTTCTTCATTGGGAGTGTGTTGAGTGGAGGAGGGAGTGTGCCTGCTCCTAAAGCAACTGCTGAGACGTGGGTGAACATGGTGAATGGGTTGCAAAAGGGGGCTCTTTCGACCCGTCTTGGGATTCCTATGATTTATGGGATTGATGCTGTTCATGGCCACAACAATGTGTATAAGGCCACGATTTTCCCT…	MGRFSVPMLGFLLLCFLAAVTEATYIKYKDPKQPLGARIRDLMSRMTLAEKIGQMTQIERAVATPDVMKQFFIGSVLSGGGSVPAPKATAETWVNMVNGLQKGALSTRLGIPMIYGIDAVHGHNNVYKATIFPHNVGLGVTRDPALVKKIGDATALEVRATGIPYVFAPCIAVCRDPRWGRCYESYSEDHKIVQAMTEIIPGLQGDLPANSKKGVPFVAGKKKVAACAKHYVGDGGTTKGINENNTVINLNGLLSIHMPAYYNSISKGVATVMVSYSSWNGKKMHANHELVTGFLKNKLKFRGFVISDWEGIDRITAPPHANYSYSVQAGVSAGIDMVMVPNNYKEFIDDLTDQVKKNIIPMSRIDDAVKRILRVKFVMGLFDSPLADTSLVNELGSQE…	8	17659925	17664551	1	aCL8110Contig1							Cs8g13800.1	100
CitBXL17	Ciclev10030270m	ATGAGGATGACTTCACTTGCTACATTAGGGTTTCTCCTATTATGCTGCATGGCATTCGCAATTCATGCATCAGACCCAGGTTACATGAAATTCAGAGACCCACAACAGCCATTGAGCAAAAGAATCAGAGACCTCATGAACAGAATGACTCTAGAAGAGAAAATTGGTCAGATGGTGCAATTAGACCGCGCGGCCGCAACCGCAGAGATCATGAGGGATTATTCTATCGGCAGCTTACTTAGCGGTGGTGGGAGCGTGCCGCGCCTTCAGGCCACGCCGCAGGAATGGATTGGCATGGTCAACGATTTTCAGAAAGGTTCATTGTCAAGCCGGCTAGGGATTCCTATGATTTATGGCATTGATGCGGTTCATGGCCACAACAATGTTTATAAGGCCACG…	MRMTSLATLGFLLLCCMAFAIHASDPGYMKFRDPQQPLSKRIRDLMNRMTLEEKIGQMVQLDRAAATAEIMRDYSIGSLLSGGGSVPRLQATPQEWIGMVNDFQKGSLSSRLGIPMIYGIDAVHGHNNVYKATIFPHNVGLGATRDPDLVRRIGAATALEVRATGINYAFAPCIAVCRDPRWGRCFESYSEDPKIVKLMTEIIPGLQGDIPSDLPKGIPYVAGRDKVAACAKHYVGDGGTTRGINENNTVIDRHGLMSIHMPAYNDAIIKGVSTVMVSYSSWNGLKMHANRDLVTNFLKGTLKFRGFVISDWQGIDRITTPEHANYSYSVLAGVNAGIDMFMLPFNHTDFIDILTDFVERKIVPMSRIDDAVRRILRVKFTMGLFEKPMADQTFIDKLG…	8	17666343	17669088	1								Cs8g13810.1	99.7
CitBXL18	Ciclev10028048m	ATGGAGTCCATTTACAGGAACCCAAATGCCCATGTTGAGGATCGAATCAAAGACCTTCTCTCTCGCATGACTTTGAAGGAGAAAATTGGTCAAATGACCCAGATCGAGCGCGGAGTCGCAACTCCATCTGTTCTCAAAGACTTATCTATTGGGAGTATTTTAAGTTCAGGAGGGAGCATGCCGTCTGTGAATGCGTTGTCAGCTGGTTGGGCGGATATGGTTGATGGATTCCAGAAGGCGGCACTCGCGTCGAGGCTTGGGATACCATTGATTTATGGGATTGATGCAGTTCATGGTAACAATAGTGTATATGGTGCCACCATATTTCCTCACAATGTTAACCTTGGGGCGACAAGAGATGGAGATTTGGCTCGAAGGATTGGGGTTGCAACAGCTCTT…	MESIYRNPNAHVEDRIKDLLSRMTLKEKIGQMTQIERGVATPSVLKDLSIGSILSSGGSMPSVNALSAGWADMVDGFQKAALASRLGIPLIYGIDAVHGNNSVYGATIFPHNVNLGATRDGDLARRIGVATALEVRASGIHYTFAPCVAVGKDPRWGRYYESYSEDTEIVRKMTSIVSGLQGRPPKEHPKGYPYVAGRNNVIACAKHFVGDGGTERGINEGNTISTYDDLEKIHMAPYLDCISQGVCTIMASYSSWNGRKLHADHFLLTEVLKNKLGFKGFVISDWEGLDRLSQPHGSNYRYCISTAVNAGIDMVMVPHRFDQFFEDLTYLVESGKVPMSRIDDAVERILRVKFVAGLFEYPFSDKSLLNIVGCKLHRELAREAVRKSLVLLKNGKKPE…	8	24253923	24258950	-1	aCL4401Contig1							Cs8g19870.1	100
CitBXL19	Ciclev10004369m	ATGCCTCGTCACTTTTTGTTTCTCACATTCTTCTTGATCTTTTCCTGCTTCGGCTCCCGTTTCGTGGAATCGCGTGTCCCGTTTGCATGCGACCCGCGAAACGGGCTGACGAGGAGCTTGAGATTCTGCCGGACGTCGGTGCCGATTCATGTCAGGGTGCAGGACTTGATCGGACGGCTGACATTGCAGGAAAAGATAAGGCTGCTTGTGAACAATGCGGCGGCTGTGCCCAGGCTTGGGATTCAGGGATACGAGTGGTGGTCCGAGGCTCTTCATGGGGTGTCAAATGTGGGTCCCGGGACTAAGTTTGGTGGGGCCTTCCCTGGGGCCACTAGCTTCCCTCAAGTCATCACCACTGCTGCTGCTTTTAATGAATCACTCTGGGAAGAAATCGGACGG…	MPRHFLFLTFFLIFSCFGSRFVESRVPFACDPRNGLTRSLRFCRTSVPIHVRVQDLIGRLTLQEKIRLLVNNAAAVPRLGIQGYEWWSEALHGVSNVGPGTKFGGAFPGATSFPQVITTAAAFNESLWEEIGRVVSDEARAMYNGGMAGLTYWSPNVNIFRDPRWGRGQETPGEDPVLAGKYAASYVRGLQGNTGSRLKVAACCKHYTAYDLDNWNGVDRYHFNARVSKQDLEDTYNVPFKACVVEGKVASVMCSYNQVNGKPTCADPDILKNTIRGQWRLDGYIVSDCDSVGVLYNTQHYTRTPEEAAADAIKAGLDLDCGPFLAIHTERAVRGGLLREEDVNLALAYTITVQMRLGMFDGEPSAQPFGNLGPRDVCTPAHQQLALQAAHQGIVLLKN…	9	1059388	1065318	1	aCL2665Contig1|aCL2665Contig2							Cs9g02570.1	94.6
GH5s β-mannosidases
CitMAN1	Ciclev10015394m	ATGGTCGCCGCCGGAAATGGACTGTTTTTCCCAATTATTGGTTTTGCATCATGTGTGGCTTTCATTTACATGTCTTTCGGTGGCTTGAATGTTAGTTATCCCAAAGAACCGGAGATGGGGTTTGTCACAAGGAATGGGACTCATTTCATGTTGGATGGAAAAGCCTTGTACGTGAATGGATGGAACTCTTATTGGTTAATGGACCATGCTGTACATGATTACAGCAGAGCTAGGGTTGGTGCAATGCTACAAGCTGGTGCTAAGATGGGTCTAACAGTTTGCAGGACTTGGGCATTCAATGATGGAGGTTATAATTCTCTCCAGATTTCACCTGGGCAATTTGATGAGCGAGTCTTCAAAGCCTTGGATCATGTCATTGTTGAAGCAAGGAAAAATGGA…	MVAAGNGLFFPIIGFASCVAFIYMSFGGLNVSYPKEPEMGFVTRNGTHFMLDGKALYVNGWNSYWLMDHAVHDYSRARVGAMLQAGAKMGLTVCRTWAFNDGGYNSLQISPGQFDERVFKALDHVIVEARKNGVRLLLSLVNNLQAYGGKTQYVNWAWEEGIGISSSNDSFFFDPSIHKYFKHYVKTVLTRKNTITGVEYRNDPTIFAWELINEPRCMSDPSGDTLQDWIDEMSAFVKSIDKKHLVTVGLEGFYGPKSPKRLTVNPEMWASALGSDFIRNSNNDNIDFASVHIYPDHWFHDLEFEDDLKFVTKWMLSHIEDGDKELNKPVFFTEYGLSNLIKGFEPSLRDKLYKTILDIVYKSAKRKRSGAGALIWQLFVEGMEEYNDDFGIVPWERTS…	2	16548474	16553062	1	aC20006A10SK_c							orange1.1t04644.1	100
CitMAN2	Ciclev10023534m	ATGCTGGAGAAAAGTTTGCAGGCAATTTTTCTGCTCTCATTGGTATCGTTTACTTATTCATTCCCTCTCTCAACAAACAAGAGATGGATTATCAATGCATCTACAGGGCAACGAGTGAAGTTAGCCTGTGTCAACTGGCCCGCTCATTTGCAGCCCATGCTAGCTGAAGGACTTGACAAGAAGCCGTTAGGTGAAATCGTGGCAGCTGTGGTCAAGATGCATTTCAATTGTGTTCGTCTCACTTGGTCAACTTTCATGTTCACTCGTCCCAACTATGGTCATATTAGCGTCTCACAAACACTTGATTCACTGGACTTGAAAGAGGCCAAGCAAGGGATTTCCAAGAACAATCCTTTTATCTTGAACATGACGCACATTCAAGCTTATGAAGCAGTAGTT…	MLEKSLQAIFLLSLVSFTYSFPLSTNKRWIINASTGQRVKLACVNWPAHLQPMLAEGLDKKPLGEIVAAVVKMHFNCVRLTWSTFMFTRPNYGHISVSQTLDSLDLKEAKQGISKNNPFILNMTHIQAYEAVVGELGAQGIMVLLDNHISKPDWCCSNTDGNGFFGDRYFDPNEWMKGLSFVADRFKEKRQVVAISLRNELRGPRQNEPDWYKYISEGARVVHKRNPHVLVFVSGLNFDLDLRFLQKSPLALDLDNKLVYEIHWYSFSQDQNMWKTQPTNIVCYKVTQSFINRAVFLTTRKNPAPLVLSEFGFDQREVNLADNLYMTCLMAYAAETDLDWALWALQGSYYLRGGLKGAEETFGALDSTWQRPRNPNFLERLRFLQTKTHVPTTSRTRTS…	3	1366610	1368717	1								Cs5g02900.1	98.7
CitMAN3	Ciclev10023981m	TCTGCTCAAACACTTCCTGCACAAGCAGGTTTTGTTCAAACTAGAGGCACCCAGTTCGTTCTAAACGGCTCTCCATTTCTCTTCAATGGATTTAACTCTTATTGGATGATGAATGTGGCATCACAGCCAAGTCAAAGGTACAAAGTTAGCGATGTCTTTCGCCAGGCCGCGGCCGCAGGGTTAAGTGTTTGTAGAACATGGGCATTTAGTGATGGAGGTTATGGAGCTCTCCAGCAATCTCCCGGAGTTTACAATGAACCAGTCTTTCAGGGCCTTGATTTTGTGATTTCAGAGGCAAGAAAGTATGGAATCCGTTTGATTCTGAGCTTGAGCAACAACTACCATGACTTCGGAGGAAGGCCACAATATGTGAATTGGGCTAGAGCTGCTGGCGCATCA…	SAQTLPAQAGFVQTRGTQFVLNGSPFLFNGFNSYWMMNVASQPSQRYKVSDVFRQAAAAGLSVCRTWAFSDGGYGALQQSPGVYNEPVFQGLDFVISEARKYGIRLILSLSNNYHDFGGRPQYVNWARAAGASVNSDDEFYTNAIVKGYYKNHVKKVLTRINTITRIAYKDDPTIMAWELINEARCQADYSGKTLNNWVQEMASYVKSIDNKHLLEIGLEGFYGDSIPDKKQFNPGYQVGTDFISNNMIKEIDFTTIHAYPDQWLPGKNDYAQMQFVQKWLASHWTDSKTILKKPLVFSEFGKSSKEAGFSINVRDSFLNTIYMNIYNLARNGGAIGGGMVWQLMAEGMQPYFDGYEIVLSQNPSTRSVIVQQSNKMTALAHILTYGKNLMGKSHYQLH…	3	21928044	21930467	-1	FGENESH	ATGTTAAAAGCCCCAGCAAAATTTTCCTTTCTTTGGGCAATTGCCCTTCTCCTACACCTAGCTTCTGCTCAAACACTTCCTGCACAAGCAGGTTTTGTTCAAACTAGAGGCACCCAGTTCGTTCTAAACGGCTCTCCATTTCTCTTCAATGGATTTAACTCTTATTGGATGATGAATGTGGCATCACAGCCAAGTCAAAGGTACAAAGTTAGCGATGTCTTTCGCCAGGCCGCGGCCGCAGGGTTAAGTGTTTGTAGAACATGGGCATTTAGTGATGGAGGTTATGGAGCTCTCCAGCAATCTCCCGGAGTTTACAATGAACCAGTCTTTCAGGGCCTTGATTTTGTGATTTCAGAGGCAAGAAAGTATGGAATCCGTTTGATTCTGAGCTTGAGCAAC…	MLKAPAKFSFLWAIALLLHLASAQTLPAQAGFVQTRGTQFVLNGSPFLFNGFNSYWMMNVASQPSQRYKVSDVFRQAAAAGLSVCRTWAFSDGGYGALQQSPGVYNEPVFQGLDFVISEARKYGIRLILSLSNNYHDFGGRPQYVNWARAAGASVNSDDEFYTNAIVKGYYKNHVKKVLTRINTITRIAYKDDPTIMAWELINEARCQADYSGKTLNNWVQEMASYVKSIDNKHLLEIGLEGFYGDSIPDKKQFNPGYQVGTDFISNNMIKEIDFTTIHAYPDQWLPGKNDYAQMQFVQKWLASHWTDSKTILKKPLVFSEFGKSSKEAGFSINVRDSFLNTIYMNIYNLARNGGAIGGGMVWQLMAEGMQPYFDGYEIVLSQNPSTRSVIVQQSNKMT…	3	21928044	21930530	-1	Cs5g20310.1	98.1
CitMAN4	Ciclev10020376m	ATGTTAGTCACAAGATTGTTCAACAGTTTCATCTTTTTGGCTCTACTAGTAATCATATATCTGAATACTTACATCTACATGGCTAAAGCCAACCCTAATCAAGAATTTGCACAAACAAATGGGAGCCATTTTGCTGTAAATGGGAAGCCTCTCTACTTAAATGGTTTCAATGCGTACTGGATGTTGTATTATGCAGGTGACCCATCAACGAAGGCGAAGGTGACAGCCGCATTTCAACAAGCCACCAAATATGGCATGAATATCGCTAGAACTTGGGCTTTTAGCGACGGCGGTTACAGAGCCCTTCAGGTTTCTCCTGGTTCATACAACGAGGACACGTTCAAGGCACTGGACTTTGTGGTGGCAGAAGCAAGGGAATACGGGGTTTATGTGATCCTA…	MLVTRLFNSFIFLALLVIIYLNTYIYMAKANPNQEFAQTNGSHFAVNGKPLYLNGFNAYWMLYYAGDPSTKAKVTAAFQQATKYGMNIARTWAFSDGGYRALQVSPGSYNEDTFKALDFVVAEAREYGVYVILSLVNNFKEYGGRPRYVEWARERGQSLKNEDDFYTNAVVKQYYKNHVKAVLTRINSITGVAYKDDPTIFAWELMNEARCPTDPSGTLLQEWIKEMAAHVKSIDNHHLLEVGLEGFYGESVPERQKYNPNNTPVGTDFITNNQIPDVDFATIHIYPEQWLPPGNTSDEIQLAFVNRWIQAHIQDSDSILKKPILIGEFGKSYKYPGYSEQKRNSYFQKVYDAIYDCAKSKGPCGGGLFWQLMTQGMTNFGDGYEVVLESSPSTANIIN…	3	47266708	47270474	1	aC04002G09SK_c							orange1.1t00612.1	100
CitMAN5	Ciclev10031098m	ATGGGGAGGTTCATTTCATTTTCCTTCCTCACTAGTCATCCTCTTCTTCTCTTACTGATCATCTTCCCAATCATCATCATCATACAACAAGCAAAGCCAGCAATTGGACTCCCTCTCTCCACAAACTCAAGATGGATCGTCGACGAAAACGGGCATCGAGTGAAGTTAGCATGCGTGAATTGGGTGTCACATCTTGAACCCGTCGTTGCAGAGGGACTTAGCAAGCAGCCCATGGATATGCTATCAAAGCGAATAGTGGACATGGGATTCAATTGCGTTAGGCTCACTTGGCCTCTTTACTTGGCCACCAATGACTCTTTGGCATCCCTCACTGTTCGCCAGTCGTTTCAGAAACTTGGTTTGCTTGAAGCCATCGGTGGCATACAATCCAACAACCCC…	MGRFISFSFLTSHPLLLLLIIFPIIIIIQQAKPAIGLPLSTNSRWIVDENGHRVKLACVNWVSHLEPVVAEGLSKQPMDMLSKRIVDMGFNCVRLTWPLYLATNDSLASLTVRQSFQKLGLLEAIGGIQSNNPSIVDLPLIKAFQAVVASLGNNNVMVILDNHISKPGWCCSNSDGNGFFGDQYFNPDLWIKGLTKMATIFNGVRNVVGMSLRNELRGPKQNVKDWYRYMQLGAEAVHAANPEVLVILSGLNFDKDLSFVRNQAVNLTFTGKLVFEAHWYGFTDGQAWVDGNPNQVCGRVVDNVMRLSGFLLEQGWPLFVSEFGADLRGNNVNDNRYLNCFFGVAAELDWDWALWTLVGSYYLREGVIGLNEYYGLFDWNWCDIRNSSFLERISSLQSP…	4	21994423	21997477	-1	aIC0AAA56DB09RM1_c							Cs7g09680.1	96.9
CitMAN6	Ciclev10000913m	ATGGCTATTATGTTCTCAACAAAGCAGCTTTTCAGCATATGCATAATCTTATCTTTTATGTTATCATTTTCTTACGGGAGATCACTGAACCCCGCATTTCGAATTAAAGCAGTTAATCTTGGAGGTTGGCTTGTAACCGAAGGCTGGATAAAGCCTTCTCTCTTCGATGGCATCCCCAACAAAGACTTTTTGGATGGAACACAACTTCAGTTTAAATCGGTTACTGTCGGCAAATATCTTTGTGCAGAGAACGGTGGAGGCACGATTGTTGTTGCAAACCGGACATCTGCATCAGGCTGGGAAACATTTAAATTGTGGAGAATCAATGAGACAAATTTCCATTTTAGAGTCTTTAACAAACAATTCATTGGACTTGACACCAATGGGAATGGAATTGAC…	MAIMFSTKQLFSICIILSFMLSFSYGRSLNPAFRIKAVNLGGWLVTEGWIKPSLFDGIPNKDFLDGTQLQFKSVTVGKYLCAENGGGTIVVANRTSASGWETFKLWRINETNFHFRVFNKQFIGLDTNGNGIDIVAESNTPGSSETFEIVRNSNDLSRVRIKAPNGFFLQAKTEELVTADYEGATSWGDDDPSVFEMTIAGRMQGEFQVTNGYGPQKAPQVMRKHWSTYIVEDDFKFIAGNGLNAVRIPVGWWMASDPAPPAPYVGGSLRALDNAFTWARKYGLRIIIDLHAAPGSQNGFEHSSSRDGSQEWGLTDDNIQQTVAVIDFLTARYARSPSLYAVELINEPLSPGASLESVNKYYKAGYDAVRKHSSTAYVVMSNRLGPMDPRELFPLASGL…	5	36638721	36641298	1								Cs3g18600.1	98.6
CitMAN7	Ciclev10001262m	ATGATCAAGAAGTGGAGTCTGGTTTTCTTCATCTTTCTGTTGATCCAAGTGAAAGCAGATGATGGGTTCATCACAGCCAAAGGAGTGCACCTAATGTTAAATGGAAGTCCATTTTATGCAAATGGATTCAATGCTTACTGGCTCATGAACACTGGGGCTAATCCATATCTGAAAGACAAAGTTTCTTCCGTGTTTCAACAAGCAAAAGAGCATGGCCTCTCAATGGCAAGAACTTGGGCTTTTAGTGATGGTGGTGACAGCCCCCTGCAGTACTCTCCAGGGTCATATAACGAGCAAATGTTCCAGGGATTGGATTTTGTAATATCTGAAGCAAGGAAATATGGGATTAAGCTAGTACTGAGTATGGTGAATAATTATGATCAATTTGGAGGGAAGAAG…	MIKKWSLVFFIFLLIQVKADDGFITAKGVHLMLNGSPFYANGFNAYWLMNTGANPYLKDKVSSVFQQAKEHGLSMARTWAFSDGGDSPLQYSPGSYNEQMFQGLDFVISEARKYGIKLVLSMVNNYDQFGGKKQYVIWARGQGQSISSDDDFFTNSVVKQYYKNHIKTVLTRINTVTGVAYKDEPTIMAWELMNEPRCYADPSGKTIQDWITEMASYVKSIDGNHLLEAGLEGFYGPSSSEKQQYNPNFQVGTDFIANNQIPSIDFATLHSYPDQWLPSSSDESQISFLNNWLYNHIQDAQDILRKPILLAEFGKSLKTSGANQRDQLFDTVYSAIYSSARSGGAAVGGMFWQLFTEGLDSYRDGYEVIFSENPSTATIITDQSQKLNRIRKMYVRLRN…	5	41201215	41203651	1	aCL7188Contig1							Cs3g25100.1	98.8
CitMAN8	Ciclev10011654m	ATGGATTATCACAAGATAACACTTGGGTCTAAGTCCTTTTTCTCATTGGTTATCTTCACGATTTTGATTGAAAACTCAAGTTGGACAGTCTTTGGAGTCAATGGTGATTGGGGATTTGAGTCAACAGTGGAGGAAATAGAGAATCATTTGTCACATGCTAGCACACATCATGGGATTTATGACTTGCAAGTTAGGGAAGATGATGACTGGCAAATGGTGCAGAAGCAAGGGAACCAATTTGTGGTTAATGACCAGCCCTTCTATGTTAATGGGTTCAATACTTACTGGTTGATGGTATTTGCTGCGGATCAATCTACAAGAGGAAAAGTCAGTGAGCTTTTTCACCAAGCTTCTTCAGCTGGTCTAACAGTTTGTAGAACTTGGGCATTTAACGATGGC…	MDYHKITLGSKSFFSLVIFTILIENSSWTVFGVNGDWGFESTVEEIENHLSHASTHHGIYDLQVREDDDWQMVQKQGNQFVVNDQPFYVNGFNTYWLMVFAADQSTRGKVSELFHQASSAGLTVCRTWAFNDGQWRALQTSPSVYDEEVFKALDFVISEAKKYKIRLILSITNNWDAYGGKAQYVKWGKAAGLNLTSDDEFFSHTTLKSYYKAHVKTVLNRVNTFTNLTYKNDPTIFAWELMNEPRCTSDPSGDTLQSWIQEMAVYVKSIDAKHLVEIGLEGFYGPSAPDRAKFNPNSYATQVGTDFIRNHQTLGVDFASVHIYADSWISQTISDAHLQFTKSWMEAHIEDAEKYLRMPVLFTEFGVSAKDTGYNTSFRDTLISSVYKTLLNSTKKGGS…	6	17735051	17737235	-1	aKN0AAB1CC03ZM1_c							Cs6g10240.1	100
CitMAN9	Ciclev10025631m	ATGAGGCGCTTGCATTTAGCTTTCGCAATCTTCTTAGCCTTTTTCATCCACCGGCAATCTTTCAACGTCCTACATGTTGAAGCAGGAGATGGATTTATAAGAACAAGAGGATCGCATTTTCTGTTGAATGGTAATCTTTACTTTGCAAATGGATTTAATGCATATTGGTTGATGTATGTAGCTTCTGACCCATCTCAGAGATCCAAAGTATCAACTGCTTTTCATGAAGCTGCAAGCCATGGCCTCACTGTTGCCAGAACTTGGGCTTTCAGTGATGGTGGTTACAGACCCTTACAGCGTTCCCCTGGCTCCTACAATGAGCAAATGTTTAAGGGATTGGATTTTGTGATAGCTGAGGCTAGAAAGTATGGGATCAAGCTCATATTGAGCTTGGCCAAT…	MRRLHLAFAIFLAFFIHRQSFNVLHVEAGDGFIRTRGSHFLLNGNLYFANGFNAYWLMYVASDPSQRSKVSTAFHEAASHGLTVARTWAFSDGGYRPLQRSPGSYNEQMFKGLDFVIAEARKYGIKLILSLANNYDSFGGKKQYVNWARSQGQFLTSDDDFFRNPVVKGYYKNLIKTVLNRYNTFTGIHYKDDPTIMAWELMNEPRCTSDPSGRTIQAWITEMASYVKSIDRNHLLEAGLEGFYGQSTPQRKRVNPNLDIGTDFIANNLIPGIDFATVHSYPDQWLSSSNDRYQLSFLNNWLDTHIQDAQHILRKPILLAEFGKSRKDPGYSTYQRDVMFNTVYYKIYSSAKRGGAAAGGLFWQLLTEGMDAFRDGYEIVLSQIPSTANVITQQAHKLY…	7	1800673	1803725	-1	aKN0AAP7YK03FM1_c|aIC0AAA8DB05RM1_c							Cs1g24390.1	99.1
CitMAN10	Ciclev10025463m	ATGGACATTGTTTTTAGCAAATGGGTATTCGCATTTTCACTTTCTTGTTGCCTCATCTTCTCCATAGCACCCTCAGTTGAGGGATTGCATGGTAATTCTAAAGTCAGAGGAGTCAATTTAGGAGGGTGGTTAGTTATTGAAGGTTGGATTAAGCCTTCACTTTTCGATGGCATTCTCAACGGAGACATGCTATTGTGGAGAGTTTCCGAATCAGAATTTCAGTTTCGCACTTCTCAAGGCCAGTTTCTAACTTGTGATGGTGAAGGCTGTGTAGTCTCTGCAACAGAAAAATCACCTTCAACACCAGAAACATTTGAAATCGAAAGAAATAATGATAGTAGAGTTCACATCAAACTTAAGAGTGGGACCTATCTGCAGGCTACCTTAGGAAACCAGCTC…	MDIVFSKWVFAFSLSCCLIFSIAPSVEGLHGNSKVRGVNLGGWLVIEGWIKPSLFDGILNGDMLLWRVSESEFQFRTSQGQFLTCDGEGCVVSATEKSPSTPETFEIERNNDSRVHIKLKSGTYLQATLGNQLTADYPGMPGWDDNAATFEMAIVANNLHGDYQLANGYGHERAKEVLKRHRNTFITIEDFNFLYRHGINTVRIPVGWWIAFDPDPPAPFIGGSLEALDNALSWAEAYNIKCIIDLHAAPGSQNGMEHSASRDGTTDWPASDYISQTLDVIDFLASRYAKHPALLGIELLNEPSSATVPLDILVPYYKQGYQIVRKYSPTAYVIVCQRIGNADPLELYQANIGSHNIVVDLHYYNLFDTFFVNMSTVDNILFIYKSREAQLQALNNANG…	7	5412237	5416674	-1								Cs1g20070.1	82.5
CitMAN11	Ciclev10026955m	ATGCCGATTCTCTTCTCATTTTACCTCTCATGGGTTCTTTTTTGTTCACTTGCATCTCCCAACTCTGTTAATTTGCCACTTAAAGCTCCTAGCTTAGGTAATTGGCTTGTGACAGAAGGATGGATGGAGCCTAATATGTTTTATGGAATTAAAAACAATGATCTTTTGGATGGAACTCAAGGGCAGTTAATATCAACAAAGCTGAAAAAGTATCTCACTGCAGAAAATGGAAGTGAGACAATCTTGATGGCCAATCATAATTCCAGTTCAGCCTCTAGCTGGCAAACTTTCAGGTTGTGGAGGATCAATGAGACATTTTATAATTTCAGATTGAGTAATAAGCAATTTATTGGATTAGAAAATCAAGGAAACAAGCTAGTAGCAGTTTCAGCAACAGAA…	MPILFSFYLSWVLFCSLASPNSVNLPLKAPSLGNWLVTEGWMEPNMFYGIKNNDLLDGTQGQLISTKLKKYLTAENGSETILMANHNSSSASSWQTFRLWRINETFYNFRLSNKQFIGLENQGNKLVAVSATEKFPEPFQITRKNGEPHRVRFRASNGYFLQAKSEMQVTADYKGPSTWEENDPSVFNMTIVSTMHGEYQITNGYGPDKAAKFMRDHWKSYITEEDFKFMSQNGLNAVRIPVGWWIAYDPKPPKPFVGGSLQALDNAFRWAQKYGMKVIVDLHALRVSQNGSPHSGSRDGFQEWSDSDIQETVAIIDFLASRYADHPSLVAIELMNEPKAPDLKLDSLKRYYKAGYDTVRKYSSSAYVILSNRLGGEWSELLSFASNLSRVVIDVHFYN…	7	20468505	20471090	-1								Cs1g01210.1	98.6
CitMAN12	Ciclev10025415m	ATGGCTTACGATTCATACGCTAACGTTGTTTCGTCACTCTTTCTCTTCTCATGTGTCATCTCTCTGTCGTTAGCACAAAATGCCGACATCAAATTGCCACTCAGAGCTGTGAATCTTGGAAACTGGCTTGTCACTGAAGGATGGATGAAACCTTCTCGCTTTGATGATATTCCCAACAAGGATCTTCTGGATGGAACTCAAGTTCAGTTCATGTCAACAAAGTTTCAGAAGTATATTGCCGCTGAAAGTGGAGGTGGCACCATTGTTGTAGCCAACAGAACCTCAGCTTCTGGCTGGGAAACTTTCAGGTTGTGGAGGGTCAATGAGACATTTTACAATTTCAGAGTGAACAATAAGCAGTTTATTGGACTGGAGAATCAAGGCCAAGGAAATGGTCTA…	MAYDSYANVVSSLFLFSCVISLSLAQNADIKLPLRAVNLGNWLVTEGWMKPSRFDDIPNKDLLDGTQVQFMSTKFQKYIAAESGGGTIVVANRTSASGWETFRLWRVNETFYNFRVNNKQFIGLENQGQGNGLVAVSNTAGYSETFQIVRKDGDSSRVRLSASNGMFIQAISETRLTADYGSSSWDDSDPSVFKLNIVSTLRGEYQITNGFGPDKAPQVLQDHWDSYITDEDFKFLSSNGINAVRIPVGWWIANDPAPPKPFVGGSSKVLDNAFDWAEKYGVKVIVDLHAVPGSQNGNEHSATRDGFQEWGDSNIADTVAVIDFLAARYCNRPSLAAIELINEPLAPGVALDTLKSYYKAGYDAVRKYTSTAYVIMSNRLGPADHKELLSFASGLSRVV…	7	20472102	20474601	-1	aCL2509Contig1							Cs1g01220.1	100
GH9s endo-1,4-β-glucanases (cellulases)
CitCEL1	Ciclev10007984m	ATGGAGAGATCAATAGAAATGGAGGAGAAAAGACAAGAGCAGTGCGTGGTGGTGAAGCAACCAAAATATTTCCAAATTTCATTTGGTTTATTATTTTACATGATGGCTCTGACCTTACCCCTAATAGTACAATGTCATGACTCCTTCAACTACGGCGATGCTCTCTCCAAGAGTCTCCTCTACTTCGAATCACAACGCTCCGGCCGGTTGCCGCACAACCAAAGAGTCACCTGGCGCCACCACTCCGGCCTCACCGACGGCCTAGAACAAGGAGTGGACTTGGTGGGAGGGTACTATGATGCTGGTGACAATGTGAAGTTTGGTTTGCCAATGGCATTTACTATAACAATGCTCTCCTGGGGAGTTATTCAGTATGGTGGAGAAATTTCCGACGCTGGC…	MERSIEMEEKRQEQCVVVKQPKYFQISFGLLFYMMALTLPLIVQCHDSFNYGDALSKSLLYFESQRSGRLPHNQRVTWRHHSGLTDGLEQGVDLVGGYYDAGDNVKFGLPMAFTITMLSWGVIQYGGEISDAGEYHHAIEAIKWGTDYFIKAHTHPHVLWVEVGDGDTDHYCWQRPEDMTTSRRAYKVDERNPGSDVAGETAAAMAAASIVFRKLNPHYSHLLLHHAQQLFEFGDKYRGKYDSSIEVVKGYYPSVSGYMDELLWAAVWLHKATDNEAYLKYVLDNADRFGGITWAITEFSWDVKYAGVQIIASMVNNHKEHEQVLERYLSKAEFYLCACLNKNNETNVDRTPGGLLYIRQWNNMQYVSTAAFLLTVYGDYLQSTNQTLKCDRGTLTPQE…	1	22784904	22786989	-1	aCL1350Contig1|C. sinensis	ATGGAGGAGAAAAGACAAGAGCAGTGCGTGGTGGTGAAGCAACCAAAATATTTCCAAATTTCATTTGGTTTATTATTTTACATGATGGCTCTGACCTTACCCCTAATAGTACAATGTCATGACTCCTTCAACTACGGCGATGCTCTCTCCAAGAGTCTCCTCTACTTCGAATCACAACGCTCCGGCCGGTTGCCGCACAACCAAAGAGTCACCTGGCGCCACCACTCCGGCCTCACCGACGGCCTAGAACAAGGAGTGGACTTGGTGGGAGGGTACTATGATGCTGGTGACAATGTGAAGTTTGGTTTGCCAATGGCATTTACTATAACAATGCTCTCCTGGGGAGTTATTCAGTATGGTGGAGAAATTTCCGACGCTGGCGAGTATCATCATGCAATC…	MEEKRQEQCVVVKQPKYFQISFGLLFYMMALTLPLIVQCHDSFNYGDALSKSLLYFESQRSGRLPHNQRVTWRHHSGLTDGLEQGVDLVGGYYDAGDNVKFGLPMAFTITMLSWGVIQYGGEISDAGEYHHAIEAIKWGTDYFIKAHTHPHVLWVEVGDGDTDHYCWQRPEDMTTSRRAYKVDERNPGSDVAGETAAAMAAASIVFRKLNPHYSHLLLHHAQQLFEFGDKYRGKYDSSIEVVKGYYPSVSGYMDELLWAAVWLHKATDNEAYLKYVLDNADRFGGITWAITEFSWDVKYAGVQIIASMVNNHKEHEQVLERYLSKAEFYLCACLNKNNETNVDRTPGGLLYIRQWNNMQYVSTAAFLLTVYGDYLQSTNQTLKCDRGTLTPQELFDFAK…	1	22784904	22786989	-1	Cs4g09790.1	99.4
CitCEL2	Ciclev10010487m	ATGGCTATGGGGACCTTCGCAAAAGCATCAATGGCCATGATCGCCCTGACATGGCCGGCTTTCTTCCAAGGGCTTTTGTTCACCGTTTACGCAAACGCAGATTTCGACTACAAAGATGCTCTCGGAAAATCAATCATTTTCCTCGAGGCACAGAGATCAGGGAGGCTCCCTCCGCGGCACAGGCCGGCTTGGAGAGGCGATTCCGGCCTTGAGGATGGCAAACAAGCAAATGTGGATCTCGTTGGAGGATACTATGACGCCGGAGATAATGTTAAGTATGGATTACCTATGGCTTTTACAATCTCTACCCTGTCTTTGAGTGCCCTGTATTATCATCAAGAGTTAAAATCCGCTGGAGAATTGCAAAACGTGATGGATGCTATACGTTGGGGCACAGAT…	MAMGTFAKASMAMIALTWPAFFQGLLFTVYANADFDYKDALGKSIIFLEAQRSGRLPPRHRPAWRGDSGLEDGKQANVDLVGGYYDAGDNVKYGLPMAFTISTLSLSALYYHQELKSAGELQNVMDAIRWGTDYFLKTSSRKNKLYVQVGDPVQDHQCWARPEEMKTPRTVLMIDSKTPGTEIAAETAAAMASASIVFRGVDRPYSRRLLNKAKLLFHFANSHKGTYDGECPFYCSYSGYNDELLWAATWLYMATRNPTYLEYIKEDSISAIVAEFSWDLKYAGAQILLSEMFFESGDQALANFKNQADSYVCSVLPESPYHQVYMTPGGLIHYRDGANAQYVTGTALLFSIYADVLAKHNQKITCGGQQFGSSQLMAFAKKQMDYLLGANPRGRSYMV…	1	25249712	25252345	1								Cs4g06270.1	99.4
CitCEL3	Ciclev10014884m	ATGAAGGGACCCCAAATTAAAAATAATAAGAACCCAAGATTTGCTTTTGTAAAACAGCAGCAGCAGCAGCATTGCTTACTAATCTTAATAAGCATTTTCATTAATGTCTCCGCTGCTGCAACGGCAACGGCTTTCGATTATGCTGACGCCTTGTCAAAGAGCCTCCTTTACTTCGAAGCTCAACGTTCAGGCCGCTTGCCGTACAACCAACGTGTCACGTGGCGGGACCATTCCGGCCTCACCGACGGCTTGGAGCAAGGGGTTGATTTGGTCGGAGGGTATTATGATGCTGGTGACCAGGTGAAATTTGGCCTGCCAATGGCTTTCACAGTGACTATGCTTTCATGGGGTGTCATCGAATTTCGTGAACAGATCGCTGCTGCCGGTGAACTAGAGCAT…	MKGPQIKNNKNPRFAFVKQQQQQHCLLILISIFINVSAAATATAFDYADALSKSLLYFEAQRSGRLPYNQRVTWRDHSGLTDGLEQGVDLVGGYYDAGDQVKFGLPMAFTVTMLSWGVIEFREQIAAAGELEHAFEAIKWGTDYFIKAHTSPNVLWAEVGDGDTDHYCWQRPEDMTTSRHAYKIDENNPGSDLAGETAAAMAAASIVFKKTNPHYSHLLLHHAQQLFEFGDKFRGKYDESVEAVKSYYASVSGYMDELLWGAMWLSKATDNDKYLQYVINNADNFGGIGWAITEFSWDVKYAGLQVMASKLLAKEQHKKQYGYILEQYRLKAEYYICSCLNKNNGSNVDRTRGGLLYIRPWNNMQYVSTAAFLLTIYSDLLLDSNQPLNCNGEIVGHQE…	2	22867080	22870230	-1	aCL1687Contig1							Cs2g20750.1	100
CitCEL4	Ciclev10014994m	ATGGCGCGAAACATACATTCATTCCCGGAAAATGCTCCCCTGCTTCGCGCTGTTTTCTTCCTGTTCCTGCTTTTCCCTCTCCGTCCAATCAGCGCCAGCCAGAACGACTACCACAGAGCCCTCCACATGAGCATTCTCTTCTTCGAAGGCCAACGGTCAGGCCGTCTCCCTCCAGATCAACGCGTAAAATGGCGCCGCGACTCCGCATTGCACGACGGAGCTACCTCCGGGGTGGACTTAACGGGAGGTTATTACGACGCCGGAGACAATGTGAAGTTCGGTTTTCCGATGGCGTTCACGACGACGATGCTCTCTTGGAGCATTATCGATTTTGGCAAAAACATGGGGCCAGAGTTAAAGTACGCCATCAAGGCCGTTAAGTGGGGGACAGATTACTTA…	MARNIHSFPENAPLLRAVFFLFLLFPLRPISASQNDYHRALHMSILFFEGQRSGRLPPDQRVKWRRDSALHDGATSGVDLTGGYYDAGDNVKFGFPMAFTTTMLSWSIIDFGKNMGPELKYAIKAVKWGTDYLLKATAKPGVVYVQVGDAFSDHNCWERPEDMDTLRTAYKIDVYHPGSDVAGETAAALAAASIVFRSRDPRYSRLLLSRAIEVFEFADRHRGAYSSSLHHVVCPFYCDVNGYQDELLWGAAWLHKASRRREYREYILRNEVVLHAGDTINEFGWDNKHAGINVLISKEVLMGKADYFESFKQNADGFICSILPGISHPQVQYSPGGLIFKAGGSNMQHVTSLSFLLLAYSNYVSHANKVVPCGSRSASPNLLRQLAKHQVDYILGDNP…	2	27428715	27432877	-1	aCL1594Contig1							Cs2g17090.1	99.6
CitCEL5	Ciclev10014583m	ATGCATGGAGGGAATCACTGGGGAGGATCATTGGAGATCGTTAACAGCAACTCAATAGCAGAAGGTTTTGCTGACAGTAATCACAACAGGAGTAACAACAACAACAACAACCACAGCAGCAGCAGCACGGACGACTGGGACAGAGCGGCGCTGCACTCGCAACGGTTTCATCACTTGGACGAGACGCAGCAGAGCTGGTTGCTGGGGCCTAAGGAAACTAACAAGAAGAACAGGTATGTCGATCTTGGTTGCATCGTCGTCAGCCACAAGGCCTTGAAATGGACGGTTGCGTCATTTCTTATCGCTTTCCTGGTGATTGGACTCCCCGTAATCATCGCCAAGTCGTTGCCCAAGCACAAGTCGGCTCCTCCATCTCCGGATGATTACACTCACGCCCTT…	MHGGNHWGGSLEIVNSNSIAEGFADSNHNRSNNNNNNHSSSSTDDWDRAALHSQRFHHLDETQQSWLLGPKETNKKNRYVDLGCIVVSHKALKWTVASFLIAFLVIGLPVIIAKSLPKHKSAPPSPDDYTHALHKALLFFNAQKSGKLPKNNGIPWRGNSGLSDGNSTTDVKGGLVGGYYDAGDNTKFHFPMSFAMTMLSWSLIEYNHKYQSIGEYDHMRDLIKWGTDYLLLTFNSSATKIDKIYAQVGGSQNGTSEPNDHNCWQRPEDMDYPRPVQTINAGPDLAGEMAAALAAASIVFKDNTAYSRKLVKGAKTVFDFAREGGKRRPYCRGNPFIEPYYNSSGYFDEYMWGAAWLYYATGNVSYLSLATNSGLPKNSKAFYRIPEKSVLSWDNKLPA…	2	29414142	29418691	1	aIC0AAA3AB03RM1_c|aIC0AAA80CA12RM1_c							Cs2g12180.1	69.7
CitCEL6	Ciclev10019799m	ATGGTACTGTCAATACTACGGAAAATGGATCCTGTTACTAAATTTTCACTAAATTTGCAGATTCTTGGCTTAACTCTTTGTGCACTTAGCTTATTGTGCTCGGCCTTCACTTTTCAAGATTACTCTGATGCTCTTGGGAAGTCCATTCTCTTCTTTGAGGGACAGCGGTCTGGAAGATTGCCGCCTAACCAGCAGCTTACATGGAGGGGCAATTCCGGGCTATCTGATGGTTCCTCTTATCATGTTGATCTAGTGGGCGGATATTATGATGCTGGTGACAACGTCAAGTTTGGCCTTCCAATGGCTTTCACAACTACATTGTTGTCCTGGAGTGTGATTGAATTTGGAAGCTCAATGCAGAACCATCTTGAGAATGCCAAAGCTGCCATCCGTTGGGGC…	MVLSILRKMDPVTKFSLNLQILGLTLCALSLLCSAFTFQDYSDALGKSILFFEGQRSGRLPPNQQLTWRGNSGLSDGSSYHVDLVGGYYDAGDNVKFGLPMAFTTTLLSWSVIEFGSSMQNHLENAKAAIRWGTDYLLKASTATPGALYVQVGDPNMDHHCWERPEDMDTPRNVYKVSTQNPGSDVAAETAAALAAASVVFKDSDPSYSTKLLKTAMKVFDFADKYRGSYSDSLNSVVCPFYCSYSGYLDELLWGASWLHRASQNSSYLAYIQSNGHILGADDDDYSFSWDDKRAGTKVLLSKGFLEKNTQEFQLYKAHSDNYICSLIPGSSSFQAQYTAGGLFYKASESNLQYVTTTAFLLLTYAKYLSSNGGVATCGSSTVKAENLIALAKKQVDYI…	3	376012	378538	-1	aCL1347Contig1							Cs5g01400.1	99.8
CitCEL7	Ciclev10019301m	ATGGAGAAGTTTATGACTCCTCTGCTTCTGCTTCTTTGCCTTCCACTTGCTTTGGCCGGCCATGACTACGGCCAAGCTTTGTCTAAGAGCATTCTCTTCTTTGAAGCTCAAAGATCTGGCTACCTCCCTCATAACCAAAGAGTCACTTGGAGAGCTAACTCTGGCCTTAACGATGGCAAAGCCAGTGGGGTGGATCTTGTAGGAGGATACTATGACGCAGGGGACAATGTGAAATTTGGATTGCCAATGGCATTCACCGTGACAATGATGTCTTGGAGCATAATTGAATATGGAAAGCAGATGGCTGCAAGTGGAGAGCTTGGCCATGCCATGAATGCTATTAAGTGGGGCACTGATTACTTCATTAAAGCTCACCCTCAGCCTAATGTCCTCTATGGA…	MEKFMTPLLLLLCLPLALAGHDYGQALSKSILFFEAQRSGYLPHNQRVTWRANSGLNDGKASGVDLVGGYYDAGDNVKFGLPMAFTVTMMSWSIIEYGKQMAASGELGHAMNAIKWGTDYFIKAHPQPNVLYGEVGDGNTDHNCWQRPEDMTTDRRAYKIDPSNPGSDLAGETAAAMAAASIVFRHSDPAYSSELLRHAYQLFDFADKYRGKYDGSITVAQKYYRSISGYNDELLWAAAWLYQASGNQHYLDYLGKNGDSMGGTGWGMTEFGWDVKYPGVQTLVAKFLMQGKAGHYAPVFERYQQKAEYFMCSCLGKGSRNVQKTPGGLIFRQRWNNMQFVTSASFLATVYSDYLASAGRDLKCSAGNVAPAELLGFAKSQVDYILGDNPRATSYMVGY…	3	972289	976751	-1	aCL5093Contig1							Cs5g02320.1	98.9
CitCEL8	Ciclev10023813m	ATGGGGCAAGGTCGAATTACTAGACTTGGGGTTTGGGGTCTGATATTGTGGCATTTTTTGGCTAGTAACAAAGTGACAGCCATAGATCATGAAGGGTTTTGCTCCACTACAACTTTTGCTTATAGGGATGCACTTGGGAAAGCAATCTTGTTTTTCGAAGGGCAACGTTCAGGGAAGTTGCCTGAAAGCCAAAGAGTGAAGTGGAGGGGAAATTCTGCACTCTCTGATGGCAAGCCTGAAAACGTAAACTTGATAGGAGGTTACTACGACGCTGGTGACAATGTGAAGTTCGGATGGCCAATGGCATATAGTGTCAGCTTGTTGAGTTGGGCTGCTGTTGAGTACCAAAGAGAAATCTCGTCAGTCAATCAGCTCGGCTACCTACGTGGAGCAATTCGC…	MGQGRITRLGVWGLILWHFLASNKVTAIDHEGFCSTTTFAYRDALGKAILFFEGQRSGKLPESQRVKWRGNSALSDGKPENVNLIGGYYDAGDNVKFGWPMAYSVSLLSWAAVEYQREISSVNQLGYLRGAIRWGTDFILRAHTSPTTLYTQVGDGNADHQCWERPEDMDTPRTLYRITSDSPGSEAAAESAAALAAASIVFKKVDSIYSSRLLNHSKSLFEFADKHRGSYQASCPFYCSYSGYQDELLWAAAWLYKASEDNKYLNYVLSNQGWSQVASEFSWDNKFAGAQMLLAKEFFGGNKQLSLFKIHVESFVCALMPESSSVRIETTPGGLLYIRDSSNLQYVTSATLLLFLYSKTLNTAHINGLQCGSAHFSASQISAFAKSQVDYILGKNPMK…	3	1449602	1451887	1								Cs5g03000.1	96.2
CitCEL9	Ciclev10019883m	ATGGCAATGCGAAGGGGAGTTTCTTTGCGCTGCTGTTGCCTCTTTTTGTTTTTGCTTCTCATCGAAAATGCCTATGGAAACCCTAATTACAGAGAAGCTTTGGCAAAATCTCTGTTGTTTTTTCAAGGCCAGAGGTCAGGGAGACTTCCCAAGGACCAACAAATCACTTGGAGATCCAATTCTGGGCTCTCTGATGGGTTATTTGCTCATGTTGATTTAACTGGAGGTTACTATGATGCTGGAGACAATGTGAAGTTCAATTTCCCCATGGCCTTCACGACAACAATGCTATCCTGGAGCACACTCGAATACGGCAAGAAAATGGGCCCAGAGTTACAGAACGCCAGGGCAGCAATCCGGTGGGCGACGGACTATCTCCTCAAGTGTGCAACCGCAACA…	MAMRRGVSLRCCCLFLFLLLIENAYGNPNYREALAKSLLFFQGQRSGRLPKDQQITWRSNSGLSDGLFAHVDLTGGYYDAGDNVKFNFPMAFTTTMLSWSTLEYGKKMGPELQNARAAIRWATDYLLKCATATPGKLYVGVGDPNADHKCWERPEDMDTVRSVYSVSASNPGSDVAGETAAALAAASLVFRKGDPRYASLLLRTAKNVLQFAMQYRGAYSDSLGSAVCPFYCSYSGYKDELLWGAAWLFRATNDVTYYNFIKSVGDDGGTDVFSWDNKFAGAHVLLARGALLNRDNNFEPYRQEAEDFICRILPNSPFTTTQYTQGGLMYKMPESNLQYVTSISFLLTTYAKYMRATKHYFNCGNMVVNPGLLTSLAKRQVDYILGVNPIKMSYMVGFG…	3	21940551	21944032	1	aKN0AAK1AB05FM2_c							Cs5g20320.1	98.2
CitCEL10	Ciclev10019602m	ATGGAAAATATGCGCTATCTATCTATCACGTCATCGGACTCTACCAATTGGTTGGTCGGTTTGTTGGTTTGGTTTCTTTATTCTGAGGAGCAGCCCCAATCTTCAAAAATGGCTCTCTCCCTTTCTCTTTTTACTCGCTTGGTCCTCCTTTGTTGGTTCACCACTTCCCTGCTTCTCTGCAATGGCTTCCCTGCTGCTTTTCACCCGCACCACCACCATCCCCACTTTGCTAAACACAACTACAGAGATGCTCTCACCAAATCAATCATCTTTTTTGAAGGCCAAAGGTCTGGAAAGCTCCCACCTAACCAGAGGATGACTTGGAGGAGGGACTCTGGTCTCACTGATGGAGCAGCCATGCATGTTGATTTGGTTGGTGGGTACTACGATGCAGGGGAC…	MENMRYLSITSSDSTNWLVGLLVWFLYSEEQPQSSKMALSLSLFTRLVLLCWFTTSLLLCNGFPAAFHPHHHHPHFAKHNYRDALTKSIIFFEGQRSGKLPPNQRMTWRRDSGLTDGAAMHVDLVGGYYDAGDNVKFGFPMAFTTTMLSWSVIEFGGLMKGELRNAREAIRWATDYLLKATVHPDTIYVQVGDANKDHACWERPEDMDTPRTVIKIDRNYPGSDVAGETAAALAAASLVFRRSDPTYSKLLVRRAIRVFQFADKYRGAYSNGLKKFVCPFYCSYSGYQDELLWGAAWLHKATRNPTYLNYIQVNGQILGAAEYDNTFGWDNKHVGARILLSKAFLVQKLQSLHEYKDHADNFICSLIPGASFSSAQYTPGGLLFKMSDSNMQYVTSTSF…	3	46004400	46007704	1	aCL7597Contig1	ATGGCTCTCTCCCTTTCTCTTTTTACTCGCTTGGTCCTCCTTTGTTGGTTCACCACTTCCCTGCTTCTCTGCAATGGCTTCCCTGCTGCTTTTCACCCGCACCACCACCATCCCCACTTTGCTAAACACAACTACAGAGATGCTCTCACCAAATCAATCATCTTTTTTGAAGGCCAAAGGTCTGGAAAGCTCCCACCTAACCAGAGGATGACTTGGAGGAGGGACTCTGGTCTCACTGATGGAGCAGCCATGCATGTTGATTTGGTTGGTGGGTACTACGATGCAGGGGACAATGTAAAGTTTGGGTTTCCCATGGCTTTCACAACCACCATGCTTTCATGGAGTGTCATTGAGTTTGGCGGGTTGATGAAAGGTGAGCTGCGGAATGCCAGAGAGGCC…	MALSLSLFTRLVLLCWFTTSLLLCNGFPAAFHPHHHHPHFAKHNYRDALTKSIIFFEGQRSGKLPPNQRMTWRRDSGLTDGAAMHVDLVGGYYDAGDNVKFGFPMAFTTTMLSWSVIEFGGLMKGELRNAREAIRWATDYLLKATVHPDTIYVQVGDANKDHACWERPEDMDTPRTVIKIDRNYPGSDVAGETAAALAAASLVFRRSDPTYSKLLVRRAIRVFQFADKYRGAYSNGLKKFVCPFYCSYSGYQDELLWGAAWLHKATRNPTYLNYIQVNGQILGAAEYDNTFGWDNKHVGARILLSKAFLVQKLQSLHEYKDHADNFICSLIPGASFSSAQYTPGGLLFKMSDSNMQYVTSTSFLLLTYAKYLTSAHRVVNCGGTTVTAKRLRTIAKRQV…	3	46003795	46007704	1	Cs5g33460.1	100
CitCEL11	Ciclev10024241m	ATGGCAGAGAGAAACAATATGTGGGGAGGTTCGTTTGAAATAAGGGCAGCGGAAGATGAAGATGGGGAGTGCAACAACGATGGGGCAGCATCGACTGCGTTGGAGGAGGAGGTGAAGCAGAGCTGGTTGTTGAGGCCAGATATTGAGAGAGAAAGGACAAGGAAGAAGAAGAAGAAGAAGTTTATTATAAACAGCATGATGGTTAGGACTCTGGCCGTTTTGGCTGCTGTTGTTATTATTATTCTCATTGTTGTCGTCACCTGTCGCCGCCGCCGCCACCATCCGATTCCCGGCCCCGACAACTATACTCTTGCCCTTCCATTGTCTCTCATGTTCTTCGATGCCCAACGATCCGGAAGACTCCAAAGGAATATTTATAATAATGTTTCATGGAGAGGG…	MAERNNMWGGSFEIRAAEDEDGECNNDGAASTALEEEVKQSWLLRPDIERERTRKKKKKKFIINSMMVRTLAVLAAVVIIILIVVVTCRRRRHHPIPGPDNYTLALPLSLMFFDAQRSGRLQRNIYNNVSWRGNSCLQDGQKTFINNLVGGYYDAGDAIKLSFPTSFAMTMLSWSALEYSTKYEANGELDHVKDIIKWGTDYLLKTFNSSADSINMIASQVGGGDPSSKDTDPHDLNCWMRPEDIDNNDPRPVYKCYNCPALAAEMAAALAAASIVFKDNQDYSIKLVHGAKILFQFATKRQGGDYAGKPDAPSVYYNSTGFWDEFVWAGAWLYCATGDSSYLQLVTTPALAKHADAFWGGPHHSVLSWNSKYVGAQLLLTRMRLFLRYGYPYEEMLRT…	3	46203505	46205788	-1								Cs5g33760.1	99.8
CitCEL12	Ciclev10024030m	ATGGAACGAAATAACCTTCGCAAGACAAAAACCCAAATAGTTGGTCGATTTTTGGATGGTTTACATCCTAAAATAAAAAGATCAAGCCAGTTAACCTCTTACACTAACCAACTACTAGCCCATGCTAAACAGCTCTTCCAATTTGCTCGCAATTACCCTGGTCTCCACCAAAACAGCATCCCTGTCATTGATAAGTTCTATTCCAGCACTCGATATGAGGATGAATTGTTGTTGGCTACTGCTTGGCTTCATCGTGCTACCAATGACCGAACATACCTGAATTACCTTGTTAGTACAGGAAAAACCGGTGGAACAAGGTCTCTTTTCGCATGGGATGACAAGTACGTTGGTGCACAAGTCCTGGCAGGTAGGCTCGTATTTGAGGGCCAGGGGTCGTCC…	MERNNLRKTKTQIVGRFLDGLHPKIKRSSQLTSYTNQLLAHAKQLFQFARNYPGLHQNSIPVIDKFYSSTRYEDELLLATAWLHRATNDRTYLNYLVSTGKTGGTRSLFAWDDKYVGAQVLAGRLVFEGQGSSGGDNNNNNNKSSTGASSRSSSTGTLLLPQYKSQAEQFIWSCVQEGNNNNNLQKTPGGLLWFQPWIKLQYAATATFVVTVCSNYLTAAHASIQCSGGLVQPSDLMDLARSQADYILRKNPKEMSYTRRINRINQDRQDSTPVARQGGFDLWFNSKAPNPNVLDGAVVGGPDENDGYTDSRGNFQFAKPCHLLLHQHQHPLVVVGVSASLAS*	3	50898700	50900533	1	aIC0AAA36DD01RM1_c|FGENESH	ATGGTGTATAATTATTATTATCATTGGGAGGGGCAAAATTTGCAGCTTCGATGGAGTTGGTTGGAGATATCCGCATTCTACAATGATCCTTTAGGAAGTTCGCTAACCCCCCTACTCTCCTCGATAATTAATGATACTCGTATGCCTATCTTCTCTTCTTCACTGCATCATTTTATAGCTATTAATAATACTTGGCGTTGGCGGATTCCGCTACTCTTTTTCTTTTCGGTCGATACTCTCTCCCATCCAAACACCCATAAGCTGGCCACCATAGCCAGCGGAAACACACAAAGACAGCCGCAAACCGCCAGTCAATTCGCTGCCATCCGCCGCGAGTTGACAGCCACCACCACTACCAATCCGTCCACCATCATTAGCCCTTTCTTTCCAGCCACTCCT…	MVYNYYYHWEGQNLQLRWSWLEISAFYNDPLGSSLTPLLSSIINDTRMPIFSSSLHHFIAINNTWRWRIPLLFFFSVDTLSHPNTHKLATIASGNTQRQPQTASQFAAIRRELTATTTTNPSTIISPFFPATPAANRRPVHRKSKPTSNCHFKSIFLLTSYTNQLLAHAKQLFQFARNYPGLHQNSIPVIDKFYSSTRYEDELLLATAWLHRATNDRTYLNYLVSTGKTGGTRSLFAWDDKYVGAQVLAGRLVFEGQGSSGGDNNNNNNKSSTGASSRSSSTGTLLLPQYKSQAEQFIWSCVQEGNNNNNLQKTPGGLLWFQPWIKLQYAATATFVVTVCSNYLTAAHASIQCSGGLVQPSDLMDLARSQADYILRKNPKEMSYTVGFGANYPTQPNHR…	3	50897690	50900504	1	Cs1g02720.1	89.2
CitCEL13	Ciclev10033912m	ATGCTTACTACTACCACCAATTCTGGAAATACTGACAAAATCCTCTTCACTGAATACAGCGTCGTTGAAGGCCAAAAGAGCGGGGCCCTGCCACTGAGCCAAGCTACTAGACAAGAGAGAATCAGAAGCGTGGACCCTGCGGTCCAGGCAGAAGCGGACAAGTGTGGCGCCGGCATCATCGGCGTTCTGAATGAGTTCCTTGAGTACAGTTGTGCCTTCCGGATAGTTCAACAACACTTCCCGGATCCTCCGAGTCAGGCAGCAGCCGATGCCGCGGAATACAACTACGCCGAAGCCCTTGACAAGACCTTTCTGTTCTTCGAGGCGCAAAGGTCCGGGAAACTACCGGAGAACCAGAGAGTTAAGTGGCGAGGAGACTCCGGTCTCAAGGACGGGTCT…	MLTTTTNSGNTDKILFTEYSVVEGQKSGALPLSQATRQERIRSVDPAVQAEADKCGAGIIGVLNEFLEYSCAFRIVQQHFPDPPSQAAADAAEYNYAEALDKTFLFFEAQRSGKLPENQRVKWRGDSGLKDGSLQGVDLVGGYYDAGDHVKFGLPAAFTVTMLAWGTIEYRKEITELNQMGHALWAIRWGTDYFMKAHTQPNVLWAQVGDGDSDHYCWERAEDMTTPREAFKLDQYHPGSDLAGETAAALAASAIAFKPYNSSYSELLLLHAKQLFSFADRFRGLYDDSIKCAKQFYTSSGYSDDLLWAATWLYRATNEECYLKYVVDNAEYMGGTGWAVKEFSWDNKYAGVQILLSKVLMEGRGGAYTATLKQYKAKADYFACACVQKNAGYNVHLTP…	4	18758379	18762611	-1	FGENESH	ATGAGGAGCTTAAGCTTTTGTATATTCATCTTTCTAGTTGCTTTCAAGGCAGCAGCCGATGCCGCGGAATACAACTACGCCGAAGCCCTTGACAAGACCTTTCTGTTCTTCGAGGCGCAAAGGTCCGGGAAACTACCGGAGAACCAGAGAGTTAAGTGGCGAGGAGACTCCGGTCTCAAGGACGGGTCTCTTCAAGGAGTGGATTTGGTGGGAGGATATTATGATGCTGGAGATCATGTAAAGTTTGGACTGCCAGCAGCATTTACTGTTACAATGCTTGCATGGGGAACCATTGAGTACAGAAAAGAGATCACAGAATTAAACCAAATGGGTCACGCTCTGTGGGCCATCAGATGGGGAACGGACTATTTCATGAAAGCACATACTCAGCCTAATGTT…	MRSLSFCIFIFLVAFKAAADAAEYNYAEALDKTFLFFEAQRSGKLPENQRVKWRGDSGLKDGSLQGVDLVGGYYDAGDHVKFGLPAAFTVTMLAWGTIEYRKEITELNQMGHALWAIRWGTDYFMKAHTQPNVLWAQVGDGDSDHYCWERAEDMTTPREAFKLDQYHPGSDLAGETAAALAASAIAFKPYNSSYSELLLLHAKQLFSFADRFRGLYDDSIKCAKQFYTSSGYSDDLLWAATWLYRATNEECYLKYVVDNAEYMGGTGWAVKEFSWDNKYAGVQILLSKVLMEGRGGAYTATLKQYKAKADYFACACVQKNAGYNVHLTPGGLMYVREWNNMQYASAAAFLLSVYYDYLSAANAKLNCPDGQIQPQQLFDFAKSQADYILGKNPNSMSYL…	4	18758379	18761447	-1	Cs7g13990.1	97.6
CitCEL14	Ciclev10003884m	GGTGATTCTTGTCTGACAGATGGAAAATTTGATTCCTCTGGTATTACAAATGATCTACTCGGGGGATATTATGATGCTGGAGATGCAATTAAGTTTCATTTCCCTGCATCTTTCAACGTGACAATGTTGAGCTGGAGTGTGATAGAGTACAGGGCCAAATATGAAGCCGCTGGGGAGCTTAACCATGTTAAAGAAATTATCAAGTGGGGTACTGATTACCTTCTCAAGACCTTCAATCATTCTGCCGATTCTATTTCCAGGATCATTGCACAGGTTGGAGTAGGGGATATATCTGGTGGGAATAAAATTCCCAATGATCTCTATTGTTGGATTCGCCCTGAGGGTATTGATTATGACCGTCCGGTTCAAGAATGTACCAGTAGCTCGGATCTTGCTGCT…	GDSCLTDGKFDSSGITNDLLGGYYDAGDAIKFHFPASFNVTMLSWSVIEYRAKYEAAGELNHVKEIIKWGTDYLLKTFNHSADSISRIIAQVGVGDISGGNKIPNDLYCWIRPEGIDYDRPVQECTSSSDLAAEMAAASIVFKDNEEYSKKLIHSAIMIFKFSRQYRGRYSAGGVEAGWFYNSRSYWDEFTWSGAWLYYATGNSSYLKLVTTTGLGKQAGIFRGILDNSLLSWDNMPAGTALLLSRLRLLLNLGYPYDEMLRAFHNQTAITMCSYLPNFSSWNATKAKLSFAFYRGLIQLNHGRPQPLQYVTNAAFLASLFSNCLEAAGLLGWFCGPNLITTDVMRRFAKTQIDYILGNNPQKMSYLVGFGSPYPQYVHHRGASIPKNKIKYSCKGGWK…	5	108929	112283	-1	FGENESH	ATGGCTGGTTTCATCACTCTTCAACACATTGATGCTTCTCCTCCTTTCAATTTGCACAAGGTGGCCCTTGGGTTTTTCAAGTCTCAACGATATGGAAAATTTGATTCCTCTGGTATTACAAATGATCTACTCGGGGGATATTATGATGCTGGAGATGCAATTAAGTTTCATTTCCCTGCATCTTTCAACGTGACAATGTTGAGCTGGAGTGTGATAGAGTACAGGGCCAAATATGAAGCCGCTGGGGAGCTTAACCATGTTGGAGTAGGGGATATATCTGGTGGGAATAAAATTCCCAATGATCTCTATTGTTGGATTCGCCCTGAGGGTATTGATTATGACCGTCCGGTTCAAGAATGTACCAGTAGCTCGGATCTTGCTGCTGAAATGGCTGCTGCA…	MAGFITLQHIDASPPFNLHKVALGFFKSQRYGKFDSSGITNDLLGGYYDAGDAIKFHFPASFNVTMLSWSVIEYRAKYEAAGELNHVGVGDISGGNKIPNDLYCWIRPEGIDYDRPVQECTSSSDLAAEMAAASIVFKDNEEYSKKLIHSAIMIFKFSRQYRGRYSAGGVEAGWFYNSRSYWDEFTWSGAWLYYATGNSSYLKLVTTTGLGKQAGIFRGILDNSLLSWDNMPAGTAPVNITLKSGVSYEEMLRAFRNQTAVTIYSYPPNFSSWNRTKGGLIQLNHGRPQPLQYVTNAAFLASLFSNCLEAAGLLGWFCGPNLITTDVMRRFAKTQIDYILGNNPQKMSYLVGFGSPYPQYVHHRGASIPKNKIKYSCKGGWKWRHSSKPNPNTLVGAMV…	5	108929	112873	-1	Cs3g01100.1	23.9
CitCEL15	Ciclev10000600m	ATGAGTATGTTTGGAAGAGATCCGTGGGGTGGCCCACTGGAGATCAACGCGGCGGACTCAGCCACTGACGACGATCGGAGCAGGAACCTTCAGGATTTCGACAGGGCAGCTCTGTCTCGGCCCTTGGATGAGACCCAGCAGAGCTGGCTTCTGGGTCCCACCGAAAAGAAGAAGAAGAAGTACGTAGATCTGGGTTGCATCATCGTCAGCCGTAAGATCTTCGTCTGGACTGTCGGCACTCTTCTCGTCTCCGCACTCTTAGCCGGCTTCATCACTCTTATTGTCAAAACGGTGCCGCGTCATCACCACTCTCATGCTCGCCCTGATAATTATACTCTCGCTTTGCACAAGGCCCTCATGTTCTTCAATGCCCAACGATCTGGCAAATTACCCAAGCAT…	MSMFGRDPWGGPLEINAADSATDDDRSRNLQDFDRAALSRPLDETQQSWLLGPTEKKKKKYVDLGCIIVSRKIFVWTVGTLLVSALLAGFITLIVKTVPRHHHSHARPDNYTLALHKALMFFNAQRSGKLPKHNNVSWRGNSCLKDGKSASSSISKDLVGGFYDAGDAIKFNFPQSFTITMLSWSVIEYSAKYEAAGELNHVKEIIKWGTDYFLKTFNHSADSISRMVAQVGAGDTSGGSTTPNDHYCWMRPEDIDYDRPVTECSSCSDLAAEMAASLAAASIVFKDNKAYSQKLVHGAKTLFQFSRQQRARYSAGSAEAAKFYNSTSYWDEFIWGGAWLYYATGNSSYLQLATTPGLGKHAGVFWGILDNSVLSWDNKLAGAALLLSRLRLFLSPGYP…	5	113391	116883	-1	aCL6045Contig1							Cs3g01110.1	100
CitCEL16	Ciclev10003122m	ATGCCAGACTCAAAGTTCTCTATAGCCTCTCCAACACATACCTCTGCATCTGACGCAGACATGCATTCTGTGAAATATGTCCATACAATTTCTGAGGCGGGTCGCCTTCTCCCTTCAGCGAGCCAATGGAATTCCACTGAAATTGATTTCAACCTTGCCCCTCAATCTTCTAATTCATATGGTTCACTCCCTTCAAGATACTCGAAATCTTTCGATTATGATCTTGTTATCACTGATAAAGCATACTTCAAACGTTTCCTTTACATTTCTGCCTCGGCAGCTCTTCTCATCCTGGCACTTGTTCTCCTCATACATTTCTTGCCTCACAAGCATCATCCCCACAGCCCTACAAAGAATCTCACTCTTGCTGTAAACCAAGCTCTAACATTCTTCGATGCT…	MPDSKFSIASPTHTSASDADMHSVKYVHTISEAGRLLPSASQWNSTEIDFNLAPQSSNSYGSLPSRYSKSFDYDLVITDKAYFKRFLYISASAALLILALVLLIHFLPHKHHPHSPTKNLTLAVNQALTFFDAQKSGNYPNYSPVKFRGNSGMQDGKVSNLNADLVGGFYDSGNNIKFSFPTAYAVTILSWSVIEYQEKYAEIGELSHVKDIIKWGSDYLLKVFVPTNSTPDSTILYSQASIFESWKPEDMSYVRPVSVCDSTASDLAGEIIAALSAASIVFKDKIMYSGELIKAAGKLYEVTSREDPGRKQGTYTKVDACGGEARDYYNSTSFIDELVWGGTWLFFATGNNSYLAYATERFKAAEDEETESEKGIFYWNNKLTATAVLLTRLRFFRDL…	5	38409326	38411705	1								Cs3g21000.1	86.4
CitCEL17	Ciclev10000849m	ATGGGGGAGAAATCAAAGTCCAAGGGTTGTTTCGGATGGTTCTTGGTCCTAGTCCTATTGGCTCTAGTTGTTGGCGCAATTGTTTACACTATTAAAAAGAAAACAAGTCACTCTGATAAACCGGCTCCGGTTCCCGGTCCCCCCGGCGCCGTCGAGAAAAAGTATGCTGAAGCCCTCAAAGTCGCAATGCAGTTCTTCGACGTACAAAAATCGGGAAAGTTAGTGAATAATAAGATATCATGGAGAGGGGATTCGGCTCTTAAAGATGGAAGAGACATGGGTTTGGATCTCACAAAAGGCATGTATGATGCTGGGGATCATATGAAGTTTGGGTTTCCGATGGCTTTTACTGCGACTGTGTTGTCGTGGGCCATCCTTGAGTATGGAGATCAGATGGAC…	MGEKSKSKGCFGWFLVLVLLALVVGAIVYTIKKKTSHSDKPAPVPGPPGAVEKKYAEALKVAMQFFDVQKSGKLVNNKISWRGDSALKDGRDMGLDLTKGMYDAGDHMKFGFPMAFTATVLSWAILEYGDQMDVVDQLQPAQDSLKWITDYLISAHPKENVLIVQVGNPDKDHKCWERPESMTEERPLTQVNTSFPGTEVAAETAAAMASASLVFKKSDSTYSSSLLKHAQQLFNFADNHRGSYSVSIPQVQNFYNSTGYGDELLWAASWLYHATGDHSYLQYVSGKNGKDFANWGSPSWFSWDNKLAGTQVLLSRLSFFSGKDISGNSGLQMYRKTAEAVMCGLLPKSPTATTSRTESGLIWVSEWNSLQHPVASAFLATVYSDYMLTSRTAELTCDG…	5	41833070	41836812	-1	aCL1288Contig1							Cs3g25940.1	99.6
CitCEL18	Ciclev10003402m	GTCGAACCGTCTGAATCACACAAACACAATTACGTTGCTGCCCTAAAAATCGCAATGCAATTCTTCGATATTCAGAAATCCGGTAAGTTGGTGAATAACCAGATTAAATGGAGAGGGGATTCGGGACTTAAAGATGGAAAGGAAGTAGATTTAGAACTCTCTAAAGGAATGTATGATGCGGGCGATGCAGTGAAATTTGGATTTCCACTGGCTTTTACTGCAACGATGTTGTCATGGACAATTCTTGAGCGTGGGCAGCGGATGGGAATGGAAGGCGTTGACCAGTTACAGAAAGCTAAAGACTCTGTCAAATGGATAACTGACTATCTTGTTAATGCCCATCCTAAGGACAACGTCCTGTATGTTCAAGTTGGCGATGCTGAAAAGGACCACAAGTGT…	VEPSESHKHNYVAALKIAMQFFDIQKSGKLVNNQIKWRGDSGLKDGKEVDLELSKGMYDAGDAVKFGFPLAFTATMLSWTILERGQRMGMEGVDQLQKAKDSVKWITDYLVNAHPKDNVLYVQVGDAEKDHKCWQRPESITDNKPLFQINTTAPGSDVAAETAAALASASLVFKKSDPPYSAKLLEHAKKLFIFADKYREYYSVSLPQVKKYYNSTGYGDELLWAASWLYHATQENIYKDYVVGSEAEEFADWGKPSWFSWDNKLAGVQVLLSRVYFFHGKDNTKLAKYQKSAQALMCTLLPESPSATSDRTNGGLIWIAEWNALQHPVAVAFLASLYGDYMEKSDNENLECDEKTFKSEDLREFAKKQADYVLGDNPNSMSYLVGYSKKFPKFVHHRG…	5	41837537	41839560	-1	FGENESH|C. sinensis	ATGGCTTGCAAGCCAATTTGCGTATGTCTCCTCGTAACGATTATAGCAGGTGCGATTGTGGGCGGTATTCTTTTTGCGGCAAAATCAATGAATAAAAAAGGAGTCGAACCGTCTGAATCACACAAACACAATTACGTTGCTGCCCTAAAAATCGCAATGCAATTCTTCGATATTCAGAAATCCGGTAAGTTGGTGAATAACCAGATTAAATGGAGAGGGGATTCGGGACTTAAAGATGGAAAGGAAGTAGATTTAGAACTCTCTAAAGGAATGTATGATGCGGGCGATGCAGTGAAATTTGGATTTCCACTGGCTTTTACTGCAACGATGTTGTCATGGACAATTCTTGAGCGTGGGCAGCGGATGGGAATGGAAGGCGTTGACCAGTTACAGAAAGCT…	MACKPICVCLLVTIIAGAIVGGILFAAKSMNKKGVEPSESHKHNYVAALKIAMQFFDIQKSGKLVNNQIKWRGDSGLKDGKEVDLELSKGMYDAGDAVKFGFPLAFTATMLSWTILERGQRMGMEGVDQLQKAKDSVKWITDYLVNAHPKDNVLYVQVGDAEKDHKCWQRPESITDNKPLFQINTTAPGSDVAAETAAALASASLVFKKSDPPYSAKLLEHAKKLFIFADKYREYYSVSLPQVKKYYNSTGYGDELLWAASWLYHATQENIYKDYVVGSEAEEFADWGKPSWFSWDNKLAGVQVLLSRVYFFHGKDNTKLAKYQKSAQALMCTLLPESPSATSDRTNGGLIWIAEWNALQHPVAVAFLASLYGDYMEKSDNENLECDEKTFKSEDLREF…	5	41837374	41839663	-1	Cs3g25950.1	96.7
CitCEL19	Ciclev10025306m	ATGGCATGTTGCGGCGATTCAATGGAAGATGAAGAGAATGGCAAGAAAATGGAAGCTGATCAGGATACTAACAAGGATCATACAAAAAGATCAAAGCTGGGATGGTTCTGGTCGCTGCTGCTGTTAATCTTTGGAGCTGTTGTTATAACGATGAGTGTTCTCACAATATTAAAATATTTTGATTACCTCAAGAAAGGTCGAGGTCCACATCATCACCAAGAAATCGTTGAAAATTATGCCAATGCTCTTGGAATATCCATGCAGTTCTTCGATGTACAAAAATCTGGAAAGTTGGTGAATAATAAGATTGTATGGAGAGGGGACTCGGCTTTACATGATGGAAGTGAAGAGAATTTAGACTTGTCAAAAGGGTTATATGATGCTGGGGATTTGATGAAG…	MACCGDSMEDEENGKKMEADQDTNKDHTKRSKLGWFWSLLLLIFGAVVITMSVLTILKYFDYLKKGRGPHHHQEIVENYANALGISMQFFDVQKSGKLVNNKIVWRGDSALHDGSEENLDLSKGLYDAGDLMKFGFPMAFTATVLSWAILEYGDHMNAVKQLEHAQESLKWITDYLINAHPSQNMLYIQVGDPDLDHSCWERPETMSEKRPLTQINTTFPGTEVAAETAAAMASASLVFRRINSSYANLLLMHARQLFTFADTYRGSYSMSVPQVQKYYNSTGYEDELLWAATWLYHATRDRSYLEYVTDINGQAFANWGIPTWFSWDNKHAGLQVLLSRINIFGSEDVSETENLGLQMYRRTAESIMCGLLPDSPTATSSRTDSGLIWIVKWNSLQHP…	7	4413773	4416816	1								Cs1g21260.1	98.4
CitCEL20	Ciclev10028301m	ATGAAGAAGAAGCTCCGATTTTCATTTCTATTGCCTACTCTACTCATCGCGGCTGTTGTTGGCCACGACTACGGCGACGCATTGTCCAAGTCGATCCTCTTCTTCGAAGGCCAGCGCTCGGGTTACCTGCCGCAGGACCAGCGCCTCGCTTGGCGTGGCAATTCCGGCCTCAGCGATGGCTGGACGTACAACACCGACCTGGTTGGCGGCTACTACGACGCCGGCGATAACGTCAAGTTCAATTTCCCCATGTCATTCACCACCACTCTCTTATCTTGGAGCATCATCGAATTCGGAGACTCCATGCCTCCCCATGAGCTGAGAAATGCACTCGTCGCTGTCCGCTGGGCCACTGATTATCTCCTCAAGATCGTTTCTCAGCCTAATCGGATTTTTGTC…	MKKKLRFSFLLPTLLIAAVVGHDYGDALSKSILFFEGQRSGYLPQDQRLAWRGNSGLSDGWTYNTDLVGGYYDAGDNVKFNFPMSFTTTLLSWSIIEFGDSMPPHELRNALVAVRWATDYLLKIVSQPNRIFVQVGDPNIDHNCWERPEDMDTERTVYAVDAPNAASDVAGETAAALAAASMAFRSSDSGYAETLLRNAVKAFQFADSYRGAYSDNPNIRDGACPFYCDFDGYQDELLWGAAWLRRASQDDTYLNYIEMNGKTLGADENINEFGWDNKHAGINVLVSKEVLEANKYTLQSYKASADSFMCTLVPESSSSHIDYSPGGLIYKPGGSNLQHATTISFLLLVYANYLAKTSQSVNCGNLYVTPASLRLQAKKQVDYILGSNPLGLSYMVGYS…	8	6681476	6683886	1	aCL2405Contig1							Cs8g08700.1	61
CitCEL21	Ciclev10004817m	ATGAAGACGACGAGTTTGTTAGTGGTAGTGGGGATGATGGCAATGGCGGCGGCGGTGGCATCACATGATTATGGAGATGCATTAGCGAAGAGCATTTTGTTCTTTGAAGGCCAAAGGTCGGGGAAATTGCCTCCTAACCAGAGGATGACTTGGAGGAAAGATTCTGCTCTTGAAGATGGCTTTCAGATTGGGGTTGATTTGACCGGTGGATATTATGATGCCGGTGACAATGTTAAATTTAACTTTCCGATGGCATTTTCAACAACTATGCTGGCGTGGAGCGTGTTAGAATTTGGAAAATCCATGGAGTCAGACCTGCAACATGCACTAGATGCCATTCGATGGGCAACTGATTACTTTTTAAAAGCCACTAGTATTCCTGGCATTGTTTATGCTCAA…	MKTTSLLVVVGMMAMAAAVASHDYGDALAKSILFFEGQRSGKLPPNQRMTWRKDSALEDGFQIGVDLTGGYYDAGDNVKFNFPMAFSTTMLAWSVLEFGKSMESDLQHALDAIRWATDYFLKATSIPGIVYAQVGEPYGDHDCWERPEDMDTARTPYAVSKQFPGSEVSAEIAAALAASSIVFRSTDSTYAVKLLNRAKTVFVFADRYRGSYNDYLGKWVCPFYCDFSGYEDELVWGAAWLYRATKAPNYWNYVVENIYNLGSGRKITNGVSSSGGSVTEFGWDNKNAGINVLVSRFINTINSNSSNPFIPKADTFVCSLLPESPTKSVSYSPGGLLFKPGGSNLQHATTLSFLLVVYSRYLKQANKDIHCGNVVVNRARLVQVAKGQVDYILGSNPLN…	9	27549972	27552373	1								Cs9g14430.1	99.4
CitCEL22	Ciclev10004877m	ATGGCAATGTTGGGGACAGTGGCATCACATAATTATGCAGATGCATTGACTAAGAGCATCTTGTTCTTCGAAGGCCAGAGGTCTGGAAAATTGCCCCAAGACCAAAGGATGACATGGAGGAAGGATTCTGCTCTAAATGATGGCGCTGACATCGGTGTTGATTTGACCGGAGGATACTACGACGCCGGCGACAATGTTAAATTTACTTTTCCCATGGCATTCACAGCAACCGTGCTGGCTTGGAGCGTGCTAGAGTTTGGGGATTCAATGGGCCCAGACCAGCATCATGCGTTAAATGCTATTCGATGGGCAACTGATTTCTTAATGAAAGCCACTAATAAACCTGACACTGTTTATTTTCAAGTTGGCCATGGTCAAGAAGACCACAATTGCTGGCAG…	MAMLGTVASHNYADALTKSILFFEGQRSGKLPQDQRMTWRKDSALNDGADIGVDLTGGYYDAGDNVKFTFPMAFTATVLAWSVLEFGDSMGPDQHHALNAIRWATDFLMKATNKPDTVYFQVGHGQEDHNCWQRPEDMDTPRAVFAATIEKPSSDVSAEIAAALAATSIVFKYSDQAYSATLLSRAKKVFEFGHKHRGRYSENYAKPPGAVCPFYCSGGIAEDDLAWGAMWLFKATNYDHYYWNSAVNSSKILNHNLHEFGWEGKNAGINVLVSTIVNKDGGTNKSDTDPFIQNADKFVCALMPESPTKVVYYTPGGLLKLQGVNFKHASLTFLLVVYSRFLKEANKEIHCGHVVVKRNRLIEIAKGYVDYMLGNNPMNMSYMVGYGKKFPHKIHHRGA…	9	27556176	27559968	1	aC20010F01SK_c							orange1.1t00533.1	99.6
CitCEL23	Ciclev10007163m	GTGGCTTCACATGATTACGGGGATGCATTGTCTAAGTGTATTTTGTTCTTTGAAGGCCAGAGGTCGGGAAAATTACCCTCTACTCAAAGGATGACTTGGAGGAAGGACTCTGCTCTTTCTGATGGCTCTGATGTTGGTGTGGATCTAGTAGGAGGTTACTACGACGCTGGTGACAACATAAAATTCAGTTTTCCGATGGCTTTCTCAACAACAATGCAGGCATGGAGCATATTAGAATTTGGCCATCTTATGGGCTCAGAGCATGAAAATGCATTAGAGTCTCTGAAATGGAGCACAGACTATTTCCTGAAAGCCACCAGCGTCCCTGGAAAAGTTGTTGCTGCAGTTGGTAACCCCAAAGGTGATCACAACTGCTGGGAGAGGCCTGAAGACATGGAC…	VASHDYGDALSKCILFFEGQRSGKLPSTQRMTWRKDSALSDGSDVGVDLVGGYYDAGDNIKFSFPMAFSTTMQAWSILEFGHLMGSEHENALESLKWSTDYFLKATSVPGKVVAAVGNPKGDHNCWERPEDMDIPRTSYLVNTTKPGSEVSAEIAAALAASSMVFKSVDSQYSNLLLQRAFQVFQFADQYQGSYNYSVGEGVCPFYCDYDGYMDELIWGAAWLFKATNEQKYWNYVVENIHFLENSVETESNKAVYVGGCFADFGWDGKNAGINVLISRWVMNTSKSDPFVSYADKFFCTVLPESPTRWVTYSPGGLMFKYGAKSIVNSQHVTATSFLLLVYSQYLTMFNRNFQCGDVAVSPSRLVQLAKVQVDYVLGSNSMGMSFMVGYGQKFPQRIH…	9	27560838	27563947	1		ATGAAGAGTGGAAAATGTATGATTATCCAAATATTGTTAGGGTTACTGGTGGGGATATTGATGGTGGCAAGGGTGGCTTCACATGATTACGGGGATGCATTGTCTAAGTGTATTTTGTTCTTTGAAGGCCAGAGGTCGGGAAAATTACCCTCTACTCAAAGGATGACTTGGAGGAAGGACTCTGCTCTTTCTGATGGCTCTGATGTTGGTGTGGATCTAGTAGGAGGTTACTACGACGCTGGTGACAACATAAAATTCAGTTTTCCGATGGCTTTCTCAACAACAATGCAGGCATGGAGCATATTAGAATTTGGCCATCTTATGGGCTCAGAGCATGAAAATGCATTAGAGTCTCTGAAATGGAGCACAGACTATTTCCTGAAAGCCACCAGCGTCCCT…	MKSGKCMIIQILLGLLVGILMVARVASHDYGDALSKCILFFEGQRSGKLPSTQRMTWRKDSALSDGSDVGVDLVGGYYDAGDNIKFSFPMAFSTTMQAWSILEFGHLMGSEHENALESLKWSTDYFLKATSVPGKVVAAVGNPKGDHNCWERPEDMDIPRTSYLVNTTKPGSEVSAEIAAALAASSMVFKSVDSQYSNLLLQRAFQVFQFADQYQGSYNYSVGEGVCPFYCDYDGYMTVARRENSKIKFTDSFQDELIWGAAWLFKATNEQKYWNYVVENIHFLENSVETESNKAVYVGGCFADFGWDGKNAGINVLISRWVMNTSKSDPFVSYADKFFCTVLPESPTRWVTYSPGGLMFKYGAKSIVNSQHVTATSFLLLVYSQYLTMFNRNFQCGDV…	9	27560766	27563947	1	Cs9g14410.1	95.8
CitCEL24	Ciclev10006662m	ATGAACATTCAATTCTCTGATAATAAAACACGTTTACAATATTTTGGTGAACAATTTCAGGTAGACTTGGTGGGCGGTTATTATGATGCTGGCGACAACATAAAATTCAGTTTTCCAATGGCTTTTACAACAACGATGCTGGCTTGGAGCATATTAGAATTCGGCAGTCATATGGGCCCAGAGCAGAAAAATGCACAAGAAGCTCTGAAGTGGGGAACAGACTATTTCCTGAAAGCCACCAGCGTTCCAGGAAAAGTTATTGCTCAAGTTGGTGAGCCCAATGCTGACCACAATTGCTGGGAGAGACCTGAAGACATGGACACTCCTCGAACCTCCTATGTTGTTAATACAACAAATCCCGGTTCGGAGGTTTCTGCTGAAATTGCAGCTGCATTAGCA…	MNIQFSDNKTRLQYFGEQFQVDLVGGYYDAGDNIKFSFPMAFTTTMLAWSILEFGSHMGPEQKNAQEALKWGTDYFLKATSVPGKVIAQVGEPNADHNCWERPEDMDTPRTSYVVNTTNPGSEVSAEIAAALAASSIVFKSVNSQYSKILLQRASQVFQFADQYQGSYNTSVGSGVCPYYCDFDGYMDELIWAAAWLFKATNRQSYMKYVVDNIHYLENSTMRQSKEALFVGGSFAEFGWDAKHAGINVLISRLVMNTSRSDPFVRHADKFICSVLPESPTKLVTYSSGGLLFKPGGSNSQHVTAMSFLLLVYSRYLTRFHRSLECGNIAVTPSRLIQVSKTQADYLLGSNPLSMSYMVGYGRKFPRRIHHRGSSLPSIDTHPKHVKCLEGSIFFKSKY…	9	27608189	27610122	1	Phytozome v10.2	ATGAATGGAAAATATAGAAGCATCCAAATGTTGTTAGGATTGGTGGGGATGATTTTGGTGGTGGGAGTGGCTTCACACGATTATGGCGACGCATTGTCGAAGTGTGTTTTGTTCTTTGAAGGCCAGAGGTCAGGGAAGCTACCATCTACTCAAAGGATGACTTGGAGGAAGGATTCTGCTCTTCGTGACGGCGCTGATGTTGGTGTAGACTTGGTGGGCGGTTATTATGATGCTGGCGACAACATAAAATTCAGTTTTCCAATGGCTTTTACAACAACGATGCTGGCTTGGAGCATATTAGAATTCGGCAGTCATATGGGCCCAGAGCAGAAAAATGCACAAGAAGCTCTGAAGTGGGGAACAGACTATTTCCTGAAAGCCACCAGCGTTCCAGGAAAA…	MNGKYRSIQMLLGLVGMILVVGVASHDYGDALSKCVLFFEGQRSGKLPSTQRMTWRKDSALRDGADVGVDLVGGYYDAGDNIKFSFPMAFTTTMLAWSILEFGSHMGPEQKNAQEALKWGTDYFLKATSVPGKVIAQVGEPNADHNCWERPEDMDTPRTSYVVNTTNPGSEVSAEIAAALAASSIVFKSVNSQYSKILLQRASQVFQFADQYQGSYNTSVGSGVCPYYCDFDGYMNFMDSAFQDELIWAAAWLFKATNRQSYMKYVVDNIHYLENSTMRQSKEALFVGGSFAEFGWDAKHAGINVLISRLVMNTSRSDPFVRHADKFICSVLPESPTKLVTYSSGGLLFKPGGSNSQHVTAMSFLLLVYSRYLTRFHRSLECGNIAVTPSRLIQVSKTQ…	9	27607965	27610122	1	Cs9g14390.1	96.1
GH16s xyloglucan endotransglycosylases / hydrolases
CitXTH1	Ciclev10010330m	ATGGTTCTTTTCTTCACTGCAATTGCATTTCATCAAGATTTTGTGATTGCCAAATTTTCCAAGAGCATGTATATCAACTGGGGTGCTCATCATTCTGCAATTGTGGGCAATGGTGAAGACTTGAACCTCGTGTTGGATCAGAGCTCAGGTTCTGGTGCCCAATCCAAGATATCATTCTTATTTGGAAGCATTGAGATGCTAATCAAGTTAGTCCCTGGAAACTCAGCTGGAACAGTCACAGCCTACTATCTAACCTCTTCGGGGAGCCAACATGATGAAATAGATTTTGAGTTCTTGGGAAATGTTTCTGGACAACCTTATATCATCCATACAAATATCTACACTCAAGGAAAGGGAGACAGAGAGCAGCAATTCTACCTTTGGTTCGACCCAACTGCT…	MVLFFTAIAFHQDFVIAKFSKSMYINWGAHHSAIVGNGEDLNLVLDQSSGSGAQSKISFLFGSIEMLIKLVPGNSAGTVTAYYLTSSGSQHDEIDFEFLGNVSGQPYIIHTNIYTQGKGDREQQFYLWFDPTADYHNYTIHWNPTEVVWYVDSVPIRVFRNYEKEGIAYPNKQGMRTHVSIWNADNWATRGGLDKIDWSNAPFIARLRRFRARACKWNGPVSISQCAAKTPGNWWTSPTYSQLSSARMGQLKWVREKYMIYNYCKDTKRFNGKMAPECSKPQY*	1	6985394	6986904	-1								Cs4g16330.1	96.9
CitXTH2	Ciclev10010151m	ATGGCAGCTTCTTTTTATGCTCTTTCTTCGAGAGCAACAACATGGATGCTATTGTCAACGCTAGCCAGCAGTTTCTTGATGGCTGCCTCTGCCGGTAACTTCTACAATGATGTTGATATCATATGGGGACAGGAGAAAGTTGAGATACTCAACAATGGCAACGATCTCACTCTCAATCTCGACAAATCTGGTGGCTCTGGCTTCCAATCCAAGAATGAGTATCAATTCGGAAAGATTGACATGCAGATCAAACTCGTCCCCGGAAATTCAGCTGGCACAGTTACTGCCTACTATTTATCTTCAAAAGGCGAAAAATGGGATGAGATAGACTTCGAGTTCTTAGGAAACGTGTCCGGTGAGCCTTACACTCTTCATACGAATGTAATTTGCCAAGGCCAA…	MAASFYALSSRATTWMLLSTLASSFLMAASAGNFYNDVDIIWGQEKVEILNNGNDLTLNLDKSGGSGFQSKNEYQFGKIDMQIKLVPGNSAGTVTAYYLSSKGEKWDEIDFEFLGNVSGEPYTLHTNVICQGQGAREQQFHLWFDPTVDFHTYSILWSPERIIFYVDDIPIREFEKMENLPFPENQAMRIYSTLWNADDWATQGGRVKTDWSYAPFTASYRNFNADACVWSNGASSCNSNDPSTGWSSKPWVWQRLDDGKRGQMKWVQDNYMIYDYCKDNKRFSQGLAPECTRAK*	1	27368734	27369957	-1								Cs4g03230.1	100
CitXTH3	Ciclev10009562m	ATGCAGTTAAAATCACCAGGATCAACATGGGATGAGATAGACTTCGAATTCTTGGGGAATTTAAGTGGCGATCCTTATACTCTTCATACGAATGTATTCACAAATGGAAAAGGAAACAGAGAGCAACAATTTCACCTCTGGTTTGACCCCACAGCTGCTTTCCACACCTATTCCATCCTCTGGAATCCTCAGCGCATTGTCTTCTCTGTTGATGGCACACCTATAAGAGAATTCAAAAACTCAGAATCAATTGGAGTGCCATTCCCAAAGAATCAGCCAATGAGAATATACTCTTCTCTTTGGAATGCTGATGACTGGGCTACGAGAGGTGGCCTTGTTAAGACAGATTGGACACATGCTCCCTTCACTGCTTCTTACAGAAACTTCAAAGCTGATGCT…	MQLKSPGSTWDEIDFEFLGNLSGDPYTLHTNVFTNGKGNREQQFHLWFDPTAAFHTYSILWNPQRIVFSVDGTPIREFKNSESIGVPFPKNQPMRIYSSLWNADDWATRGGLVKTDWTHAPFTASYRNFKADACLWSNGKSSCASSKSRSRAWFSQELDSSSQNKLKWVQKNYMIYNYCTDTKRFPQGLPVECRTA*	1	27393013	27393882	-1								Cs4g03220.1	92.3
CitXTH4								aCL107Contig2	ATGGCTTACTCAAAAAATTTTACCCTGCTCATCTCTATAGCAATCAGCTCTTTGATGGTTGCTTCTGCTAGTAATTTCTACCAAGACTTTGATATCACTTGGGGAGATGGCCGTGGTAAGATACTCAACAACGGCCAGCTTCTCTCCCTCTCCCTTGACAAAGCCTCAGGCTCAGGCTTCCAGTCCAAGAGCGAGTACCTTTTTGGCAAAATCGACATGCAACTCAAGCTTGTCCCTGGCAATTCTGCCGGCACAGTCACCGCCTACTACTTAAAATCACCAGGATCAACATGGGATGAGATAGACTTCGAATTCTTGGGGAATTTAAGTGGTGATCCTTATACTCTTCATACTAATGTGTTCACAAATGGCAAAGGTGACAGAGAGCAACAATTCCAC…	MAYSKNFTLLISIAISSLMVASASNFYQDFDITWGDGRGKILNNGQLLSLSLDKASGSGFQSKSEYLFGKIDMQLKLVPGNSAGTVTAYYLKSPGSTWDEIDFEFLGNLSGDPYTLHTNVFTNGKGDREQQFHLWFDPTADFHTYSVLWNPQRIVFYVDGSPIREFKNLESNGVLFPKNQPMRIYSSLWNADDWATRGGLIKTDWTQAPFTASYRNFNANACVWSNGKSSCNSKNNNPWFSQELDTTGQERLKWVQKNYMIYNYCKDSKRFPQGLPKECAFNI*	1	27397935	27398448	-1	Cs4g03200.1	99.6
CitXTH5								FGENESH	ATGGATCCTAACTTTTTCGGAGTACTTTTTGTAGACGCGGTCCAAGTATACGCAACACGATTGGTGAACGGCGGTGACAATATATGGAGTCGGCTTGCTAGCTCCTTCTCCCTTTGGTTATCTATCTCCAGCTCATTTTCCTCAACCAATACGAAGACCACGAAGGGGATCCTTCCACACACGACACCTCCCCCCCCCCCCAGAAAAAGAGAGCACCAATTTCTCCTCTGGTGTGACCCCACGGCTGCTTTCCACACCTATTCCGTCCTCAGGAATCCACATCGCATTGTCTTCACAGATGATGGCACACCCATAAGAGAATTCAAAAACTCAGAATCAATTGGAGTGCCATTCCCAAAGAATCAGCCAATGAGAATATACTCTTCTCTTTGGAATGCT…	MDPNFFGVLFVDAVQVYATRLVNGGDNIWSRLASSFSLWLSISSSFSSTNTKTTKGILPHTTPPPPPRKREHQFLLWCDPTAAFHTYSVLRNPHRIVFTDDGTPIREFKNSESIGVPFPKNQPMRIYSSLWNADDWATRGGLVKTDWTHAPFTASYRNFKADACLWSNGKSSCASSKSRSRAWFSQELDSSSQNKLKWVQKNYMIYNYCTDTKRFPQGLPVECRTA*	1	27399375	27400226	-1	Cs4g03210.1	63.9
CitXTH6								FGENESH	ATGACTAACCGACCGTCTGTCAAATGCTTGAAAGAATTTGACGCGGGATTGAGCCCCAGGGACCATGGTGGTGGAATCGGCAGAAGCAAAACTGCTGTTTCTGCTGGTAATTTCAATGAGGAATTTGATATCACATGGGGAGATGGTCATGGGAAAATATTCAACAACGGCCAGCTGCTTACTCTCACTCTCGACCGTTACTCTGGCTCAGGCTTCCAGTCCAAGAAACAATACTTATTCGGCAAGATTGATATGCAACTCAAGCTTGTCCCTCGAAACTCTGCTGGCACAGTCACTGCTTATTATCTACGCTCACAAGGACCAACATGGGATGAGATAGACTTTGAATTCTTGGGAAACCTGAGCGGTCAGCCGTACACAGTTCACACAAATGTGTAC…	MTNRPSVKCLKEFDAGLSPRDHGGGIGRSKTAVSAGNFNEEFDITWGDGHGKIFNNGQLLTLTLDRYSGSGFQSKKQYLFGKIDMQLKLVPRNSAGTVTAYYLRSQGPTWDEIDFEFLGNLSGQPYTVHTNVYSQGKGDREQQFHLCFSVDGIPIREFKNLEAIGVPFPKNLPMRVYSSLWNADDWATRGGLIKTDWSQAPFTASYRNFKADGSRAWLLQQMDSTNQRRLYWVQKNHMIYNYCTDTKRFPQGFPKECAVH*	1	27402470	27403928	-1	Cs4g03120.1	90.4
CitXTH7	Ciclev10009172m	ATGGCTTGCTATTCTTATTCTGCTTATCCAATTTTCTTGTTCTCTTTTATTGTCACAAGCTCTTTCATTGTTGCAAATACTGGTAATTTTAACAAAGATGTTGATATTACATGGGGTGATGGCCGTGCCAAGATTCTCAACAAAGGCAAGCTTCTTACTCTGTCTCTCGACAAAGCATCTGGCTCTGGCTTCGAGTCTAAGAATGAATTTCTCTATGGAAAATTTAATGTGCAGCTCAAGCTCGTTCCCAACAACTCTGCTGGCACTGTCACTGCCTACTATCTAAAATCTCCAGGGGCATCATGGGATGAAATAGACTTCGAATTCCTGGGGAATTTGAGTGGCAACCCTTACATTGTTCATACTAATGTCTACACACAAGGGAAAGGTGACAGAGAG…	MACYSYSAYPIFLFSFIVTSSFIVANTGNFNKDVDITWGDGRAKILNKGKLLTLSLDKASGSGFESKNEFLYGKFNVQLKLVPNNSAGTVTAYYLKSPGASWDEIDFEFLGNLSGNPYIVHTNVYTQGKGDREQQFYLWFDPTADFHTYSILWNPSHIVFSVDGIPIREFKNLEAIGVPFPKNLPMRVYSSLWNADDWATRGGLIKTDWSQAPFTASYRNFKADGSRAWLLQQMDSTNQRRLYWVQKNHMIYNYCTDTKRFPQGFPKECAVH*	1	27402470	27406142	-1	FGENESH|C. sinensis	ATGGCTTGCTATTCTTATTCTGCTTATCCAATTTTCTTGTTCTCTTTTATTGTCACAAGCTCTTTCATTGTTGCAAATACTGGTAATTTTAACAAAGATGTTGATATTACATGGGGTGATGGCCGTGCCAAGATTCTCAACAAAGGCAAGCTTCTTACTCTGTCTCTCGACAAAGCATCTGGCTCTGGCTTCGAGTCTAAGAATGAATTTCTCTATGGAAAATTTAATGTGCAGCTCAAGCTCGTTCCCAACAACTCTGCTGGCACTGTCACTGCCTACTATCTAAAATCTCCAGGGGCATCATGGGATGAAATAGACTTCGAATTCCTGGGGAATTTGAGTGGCAACCCTTACATTGTTCATACTAATGTCTACACACAAGGGAAAGGTGACAGAGAG…	MACYSYSAYPIFLFSFIVTSSFIVANTGNFNKDVDITWGDGRAKILNKGKLLTLSLDKASGSGFESKNEFLYGKFNVQLKLVPNNSAGTVTAYYLKSPGASWDEIDFEFLGNLSGNPYIVHTNVYTQGKGDREQQFYLWFDPTADFHTYSILWNPSHIVFYIDGRPIREFKNLESFGIPYPKKQSMRTYASLWNADDWATKGGLVKTDWSQAPFIASFRNFNAKACVWSNGISSCSSNSTTKNTWFSQELDFSSQRKLKWVQQNYMVYNYCTDTSRFPQGLPQECTLTNKN*	1	27404984	27406056	-1	Cs4g03180.1	100
CitXTH8	Ciclev10010798m	ATGGCTGCGGCTAAATCACTAGTAGTGCTGATAATGCTGTCTGCTTTATTATCTAACTCTTTTGTGTTAGTTTTACCAGCTAGTAATTTTTATCAAGATTTTGACATCATATGGGGAATTGACAAGGTCAGGATTCGCAACGATGGAGAAGTCCTCAATCTTTACCTTGGCAAAGACACAGGCTCAGGTTTCCAGTCCAAGAATGAGTATCTATTTGGCAAAATTGACATGCAATTCAAGCTTGTCCCAGGCAACTCTGCTGGCACTGTCACATCTTACTATTTGTCATCACAAGGATCAACATGGGATGAGATAGACTTTGAGTTCTTGGGAAATCTCAGTGGCGATCCTTATATTTTTCACACAAATGTAATCACACAAGGCAAAGGTGACAGAGAG…	MAAAKSLVVLIMLSALLSNSFVLVLPASNFYQDFDIIWGIDKVRIRNDGEVLNLYLGKDTGSGFQSKNEYLFGKIDMQFKLVPGNSAGTVTSYYLSSQGSTWDEIDFEFLGNLSGDPYIFHTNVITQGKGDREQQFYPWFDPTSDFHTYSILWNPKTIVFYVDGTPIREFKNLESINIPYPKNQPMRIHSSLWNADDWATRGGLVKTDWTKAPFTASCRNFNAKTCIRYPAGPIISAPCPSNSSSSAWMKIDELDETSREKLKWVQKNYMIYNYCTDTKRFPKGPPPD*	1	27415264	27417094	1								Cs4g03080.1	94.7
CitXTH9	Ciclev10008951m	ATGGCTGGTCGGATAATGCTTGTTAGTGCGTTTCGAATTATCAACTTCTCTCTGTTCATTCAAACACTACTTGTACCTCGTTTGCTCAAGCATATGTCTATGGCTTCGATGTTGCATTTGTTTCTTGTGCTTGGCTCTTTGATGGCTGCCTCTGCTGGTAACTTCTACAAAGATTTTGACATCACCTGGGGAGATGGCCGTGCCAAGATGCTCAACAATGGCGACCTTCTTACTCTTTCCCTCGATAAAGCTTCTGGCTCAGGATTCCAGTCCAAGAATGAGTATCTATATGGCAAGATTGACATGCAGCTCAAGCTTGTCCCTGGCAACTCTGCTGGCACAGTCACTGCTTATTACCTAAAATCACCGGGATCAACATGGGATGAGATAGACTTTGAA…	MAGRIMLVSAFRIINFSLFIQTLLVPRLLKHMSMASMLHLFLVLGSLMAASAGNFYKDFDITWGDGRAKMLNNGDLLTLSLDKASGSGFQSKNEYLYGKIDMQLKLVPGNSAGTVTAYYLKSPGSTWDEIDFEFLGNSSGDPYTLHTNVFTNGKGDREQQFHLWFDPTADFHTYSILWNPQRIIFSVDGTPIREFKNSESIGVPFPKNQPMRIYSSLWNADDWATRGGLVKTDWTHAPFTASYRNFNAEACVWSNGKSSCASNSASSTSSNGAWFSQELDSTNQNRLKWVQKNYMIYNYCTDTKRFPQGLPAECRIS*	1	27419632	27421046	1	Phytozome v10.2|C. sinensis	ATGGCTTCGATGTTGCATTTGTTTCTTGTGCTTGGCTCTTTGATGGCTGCCTCTGCTGGTAACTTCTACAAAGATTTTGACATCACCTGGGGAGATGGCCGTGCCAAGATGCTCAACAATGGCGACCTTCTTACTCTTTCCCTCGATAAAGCTTCTGGCTCAGGATTCCAGTCCAAGAATGAGTATCTATATGGCAAGATTGACATGCAGCTCAAGCTTGTCCCTGGCAACTCTGCTGGCACAGTCACTGCTTATTACCTAAAATCACCGGGATCAACATGGGATGAGATAGACTTTGAATTCCTGGGAAATTCAAGTGGTGACCCTTACACTCTTCATACCAATGTATTTACAAATGGCAAAGGTGACAGAGAGCAACAATTTCACCTCTGGTTTGAC…	MSMASMLHLFLVLGSLMAASAGNFYKDFDITWGDGRAKMLNNGDLLTLSLDKASGSGFQSKNEYLYGKIDMQLKLVPGNSAGTVTAYYLKSPGSTWDEIDFEFLGNSSGDPYTLHTNVFTNGKGDREQQFHLWFDPTADFHTYSILWNPQRIIFSVDGTPIREFKNSESIGVPFPKNQPMRIYSSLWNADDWATRGGLVKTDWTHAPFTASYRNFNAEACVWSNGKSSCASNSASSTSSNGAWFSQELDSTNQNRLKWVQKNYMIYNYCTDTKRFPQGLPAECRIS*	1	27419376	27421046	1	Cs4g03140.1	100
CitXTH10	Ciclev10009119m	ATGGCTTCAGTATTGCATCTGTCGCTGCTGCTTCTTGGCTCTTTGATGGTTGCCTCTGCTGGTAACTTCCACCAAGATTTTGATATCACTTGGGGAGACGGGCGTGCTAATATACTCAACAACGGCCAGCTTCTTACTCTTTCCCTTGATAAAGCCTCTGGCTCCGGCTTCCAGTCCAAGAATGAGTATCTATTCGGCAAGATTGATATGCAACTCAAACTAGTCCCTGGCAACTCTGCCGGCACTGTCACTGCTTATTATTTAAAATCGCCAGGATCAACATGGGATGAGATAGACTTCGAGTTCTTGGGGAATTTAAGTGGTGACCCTTACACTCTGCATACCAATGTATTCACAAATGGCAAAGGTGACAAAGAACAACAATTTCACCTCTGGTTT…	MASVLHLSLLLLGSLMVASAGNFHQDFDITWGDGRANILNNGQLLTLSLDKASGSGFQSKNEYLFGKIDMQLKLVPGNSAGTVTAYYLKSPGSTWDEIDFEFLGNLSGDPYTLHTNVFTNGKGDKEQQFHLWFDPTADFHTYSILWNPQRIVFSVDGTPIREFKNSESIGVAFPKNQPMRIYSSLWNADDWATRGGLVKTDWTHAPFTASYRNFNADACVWSNGKSSCASSSPSSPSSSSAWFSQELDSTSQERLKWVQKNYMIYNYCADAKRFPQGLPAECRTS*	1	27422723	27424055	1								Cs4g03130.1	99.6
CitXTH11	Ciclev10010412m	ATGGGTTCTGATTCGTTTGGGGTGATGATGTGTACTTTTGTTGGGCGTTTAGCTGCTGTTTCTGCTGGTAATTTCAATGAGGAATTTGATATCACATGGGGAGATGGTCATGGGAAAATATTCAACAACGGCCAACTGCTTACTCTCAATCTCGACCATTACTCTGGCTCAGGCTTCCAGTCCAAGAAACAATACTTATTCGGCAAGATTGATATGCAACTCAAGCTTGTCCCTCGCAACTCTGCTGGCACTGTCACTGCTTATTATCTACGCTCACAAGGACCAACATGGGATGAGATAGACTTTGTATTCTTGGGAAACCTCAGTGGTCATCCGTACACAGTTCACACAAATGTGTACAGCCAAGGCAAGGGTGACAGAGAGCAGCAATTTCATCTC…	MGSDSFGVMMCTFVGRLAAVSAGNFNEEFDITWGDGHGKIFNNGQLLTLNLDHYSGSGFQSKKQYLFGKIDMQLKLVPRNSAGTVTAYYLRSQGPTWDEIDFVFLGNLSGHPYTVHTNVYSQGKGDREQQFHLWFDPTVNFHTYSVLWNPQRIVFSVDGIPIREFRNLEAIGVPLPKNQPMRIYSSLWNADDWATRGGLIKTDWSQAPFTASYRNFKVDGSRAWLLQQMDSTNQRRLYWVRKNHMIYNYCTDTKRFPQGFPKECAVH*	1	27425507	27426490	-1								Cs4g03120.1	91.8
CitXTH12	Ciclev10010531m	ATGCCTTGCTATTCTTATTCTTCTTATCCAATTTTCTTGTTCTCTTTTATTGTCACAAGCTCTTTCATTGTTGCAAATGCTGGTAATTTTAACAAAGATGTTGATATTACATGGGGTGATGGACGTGCCAAGATTCTCAACAAAGGCAAGCTTCTTACTCTGTCTCTCGACAAAGCATCTGGCTCTGGCTTCCAGTCTAAGAATGAATTTTTCTATGGAAAATTTGATATGCAGCTCAAGCTTGTTCCCAACAACTCTGCTGGCACTGTCACTGCCTACTATCTAAAATCTCCAGGGGCATCATGGGATGAAATAGACTTCGAATTCCTGGGGAATTTGAGTGACAGAGAGCAACAATTCTACCTCTGGTTTGATCCCACTGCCGATTTTCACACTTAT…	MPCYSYSSYPIFLFSFIVTSSFIVANAGNFNKDVDITWGDGRAKILNKGKLLTLSLDKASGSGFQSKNEFFYGKFDMQLKLVPNNSAGTVTAYYLKSPGASWDEIDFEFLGNLSDREQQFYLWFDPTADFHTYSILWNPGHIVFYIDGRPIREFKNLESFGIPYPKKQSMRMYASLWNADDWATRGGLAKTDWSQAPFTASFGNFNAKACVLSIGISSCSSNPATKNTWFSQELDSSSQRKLKWVQQNYMVYNYCADTSWFPQCLPQECTNKN*	1	27428533	27429599	-1								Cs4g03110.1	86.1
CitXTH13	Ciclev10010722m	ATGGCTGCGGCTAAATCACTAGTAGTGCTGATAATGCTGTCTGCTTTATTATCTAACTCTTTTGTGTTAGTTTTACCAGCTAGTAATTTTTATCAAGATTTTGACATCATATGGGGAATTGACAAGGTCAGGATTCGCAACGATGGAGAAGTCCTCAATCTTTACCTTGGCAAAGACACAGGCTCAGGTTTCCAGTCCAAGAATGAGTATCTATTTGGCAAAATTGACATGCAATTCAAGCTTGTCCCAGGCAACTCTGCTGGCACTGTCACATCTTACTATTTGTCATCACAAGGATCAACATGGGATGAGATAGACTTTGAGTTCTTGGGAAATCTCAGTGGCGATCCTTATATTTTTCACACAAATGTAATCACACAAGGCAAAGGTGACAGAGAG…	MAAAKSLVVLIMLSALLSNSFVLVLPASNFYQDFDIIWGIDKVRIRNDGEVLNLYLGKDTGSGFQSKNEYLFGKIDMQFKLVPGNSAGTVTSYYLSSQGSTWDEIDFEFLGNLSGDPYIFHTNVITQGKGDREQQFYPWFDPTSDFHTYSILWNPKTIVFYVDGTPIREFKNLESINIPYPKNQPMRIHSSLWNADDWATRGGLVKTDWTKAPFTASCRNFNAKTCIRYPAGPIISAPCPSNSSSSAWMKIDELDETSREKLKWVQKNYMIYNYCTDTKRFPKGLPLECAVATSAYVDSARV*	1	27441599	27442770	1								Cs4g03080.1	100
CitXTH14	Ciclev10008778m	ATGGCTGGTCGGATAATGCTTGTTAGTGCGATATGCACAGCTATTTTATTATACTTTTTTCAAGCCAACAACTGTCCACAGCCGAGCTCACTGGACCTTTCCCTTCACTTTCCTCTGCATTTTACATTTCCCATCTTCACCGGCTATAAATACAACACAATGTTAATTCAAACACTACTTGTACCTCGTTTGCTCAAGCATATGTCAATGGCTTCAACGTTGCATTTGTTTCTTGTGCTTGGCTCTTTGATGGTTGCATCTGCTGGTAACTTCTACAAAGATTTTGACATCACCTGGGGAGATGGCCGTGCCAAGATGCTCAACAATGGCGACCTTCTTACTCTTTCCCTCGATAAAGCTTCTGGCTCAGGATTCCAGTCCAAGAATGAGTATCTATAC…	MAGRIMLVSAICTAILLYFFQANNCPQPSSLDLSLHFPLHFTFPIFTGYKYNTMLIQTLLVPRLLKHMSMASTLHLFLVLGSLMVASAGNFYKDFDITWGDGRAKMLNNGDLLTLSLDKASGSGFQSKNEYLYGKIDMQLKLVPGNSAGTVTAYYLKSPGSTWDEIDFEFLGNLSGDPYTLHTNVFTNGKGDREQQFHLWFDPAADFHTYSILWNPQRIVFSVDGTPIREFKNSESIGVPFPKNQPMRIYSSLWNADDWATRGGLVKTDWTHAPFTASYRNFNAEACVWSNGKSSCASNSASSTSSNGAWFSQELDSTNQNRLKWVQKNYMIYNYCTDTKRFPQGLPAECRIS*	1	27446278	27447735	1	ESTs assembly	ATGTTAATTCAAACACTACTTGTACCTCGTTTGCTCAAGCATATGTCAATGGCTTCAACGTTGCATTTGTTTCTTGTGCTTGGCTCTTTGATGGTTGCATCTGCTGGTAACTTCTACAAAGATTTTGACATCACCTGGGGAGATGGCCGTGCCAAGATGCTCAACAATGGCGACCTTCTTACTCTTTCCCTCGATAAAGCTTCTGGCTCAGGATTCCAGTCCAAGAATGAGTATCTATACGGCAAGATTGACATGCAGCTCAAGCTTGTCCCAGGCAACTCTGCTGGCACTGTCACTGCTTATTACCTAAAATCACCGGGATCAACATGGGATGAGATAGACTTTGAATTCTTGGGAAATTTAAGTGGTGACCCTTACACTCTTCATACCAATGTCTTT…	MLIQTLLVPRLLKHMSMASTLHLFLVLGSLMVASAGNFYKDFDITWGDGRAKMLNNGDLLTLSLDKASGSGFQSKNEYLYGKIDMQLKLVPGNSAGTVTAYYLKSPGSTWDEIDFEFLGNLSGDPYTLHTNVFTNGKGDREQQFHLWFDPAADFHTYSILWNPQRIVFSVDGTPIREFKNSESIGVPFPKNQPMRIYSSLWNADDWATRGGLVKTDWTHAPFTASYRNFNAEACVWSNGKSSCASNSASSTSSNGAWFSQELDSTNQNRLKWVQKNYMIYNYCTDTKRFPQGLPAECRIS*	1	27446119	27447735	1	Cs4g03060.1	94.7
CitXTH15	Ciclev10016123m	ATGGCTTCTTTTCTATGGACTCTTTGCCTGAGTGCTCTGTTTTTGGCTTCTGGAGTTATAAGTGCCCCACCAAAGAGGCCTATAGATGTACCATTTGGCCGAAATTATGTGCCAACATGGGCATTTGATCACATCAAATACTTTAATGGAGGTTCTGAGATTCAGCTTGTCCTGGATAAATACACAGGGACTGGCTTCCAATCAAAAGGTTCGTATCTGTTTGGTCACTTCAGCATGCACATAAAGATGGTTCCTGGTGATTCTGCCGGAACTGTGACTGCTTTTTACTTATCTTCTCAAAATTCGGAACATGATGAGATAGACTTTGAGTTCTTGGGGAACAGAACCGGGCAGCCATACATTTTGCAGACAAATGTGTACACTGGAGGAAAGGGAGAC…	MASFLWTLCLSALFLASGVISAPPKRPIDVPFGRNYVPTWAFDHIKYFNGGSEIQLVLDKYTGTGFQSKGSYLFGHFSMHIKMVPGDSAGTVTAFYLSSQNSEHDEIDFEFLGNRTGQPYILQTNVYTGGKGDKEQRIYLWFDPTKEFHTYSVLWNMYQIVFLVDDVPIRVFKNSKDLGVRFPFNQPMKIYSSLWNADDWATRGGLEKTDWSKAPFIASYKGFHVDGCEVSVNAKFCETQGKRWWDQKAFQDLDAYQYRRLRWVRQKYTIYNYCNDRARFPTPSPECKRDRDI*	2	11604956	11606340	-1								Cs2g14920.1	100
CitXTH16	Ciclev10016129m	ATGGTTAAAATGTCTTTGATTTTCAGTCTGTTTGTGGGTCTTTTAATGGTAGGTTTGGTCAGCTCAGCTAAGTTTGATGACCTTTATCAAACAAGCTGGGCATTTAATCATGTTCAGTATGATGGGGACACTCTCAAGCTTAACCTCGATAATTATTCCGGAGCTGGGTTTGCGTCAAAGAGCAAGTATTTGTTTGGGAAAGTCTCCATCCAAATTAAACTTGTAGGGGGTGACTCTGCTGGAACTGTCACTGCCTTCTATATGTCATCAGACGGTCCAAATCACAACGAGTTCGATTTTGAGTTCCTGGGGAACACTACAGGAGAGCCATACTTAGTCCAAACCAATGTTTATGTGAATGGTGTGGGCAACAGAGAGCAGAGACTTGACCTCTGGTTC…	MVKMSLIFSLFVGLLMVGLVSSAKFDDLYQTSWAFNHVQYDGDTLKLNLDNYSGAGFASKSKYLFGKVSIQIKLVGGDSAGTVTAFYMSSDGPNHNEFDFEFLGNTTGEPYLVQTNVYVNGVGNREQRLDLWFDPTKEFHTYSLLWNQRQVVFLVDETPIRVHTNLEHKGIPFPKDQAMGVYSSIWNADDWATQGGRVKTDWSHAPFVASYKGFEIDACECPASVAGADNAKKCSSSAEKRFWWDEPTLSELNVHQSHQLMWVRANHLIYDYCTDTSRFPAIPTECVHHRH*	2	21057080	21059316	-1	aC02023G10SK_c|aCL2652Contig1							Cs2g22200.1	100
CitXTH17	Ciclev10015872m	ATGGTGGTGTCTTATGAGGGTTGTTTTCTTCTAGTATTTTCTCTTCTTGCTGTAGTTGCTTCTGGGTTGTACAGAAACCTGCCTATTGTGCCTTTTGATGAAGGGTATAGTCATTTGTTTGGGCATGATAATCTTGTTGTTCATAGAGATGGAAAATCTGTTCATTTATCTCTAGATGAAAGAACAGGGTCTGGATTTGTGTCACATGACCTCTATCTTCATGGTTTCTTCAGTGCTTCAATAAAGTTGCCTGCTGATTATACTGCCGGCGTTGTTGTTGCCTTCTATATGTCAAATGGTGACATGTTTGAGAAGAATCATGATGAAATAGACTTTGAGTTCTTGGGTAATATTAGAGGCAAAAATTGGAGGATTCAGACTAATATTTATGGCAATGGA…	MVVSYEGCFLLVFSLLAVVASGLYRNLPIVPFDEGYSHLFGHDNLVVHRDGKSVHLSLDERTGSGFVSHDLYLHGFFSASIKLPADYTAGVVVAFYMSNGDMFEKNHDEIDFEFLGNIRGKNWRIQTNIYGNGSTSIGREERYNLWFDPSDDFHQYSILWTDSQIIFYIDGIPIREFKRTASMGGDFPAKPMSLYATIWDGSDWATNGGKYRVNYKYAPYVTEFSDFVLHGCSFDPIEQTSSKCDITESSKVSIPTGVSPSQRIKMENFRRKHMTYSYCYDQIRYKVPPSECVINPLEAERLKVHDPVTFGGGRRHHGKRHHRSRSSGTKANDV*	2	26630154	26632900	-1	aCL156Contig1							Cs2g17920.1	100
CitXTH18	Ciclev10015776m	ATGAAATTCTCTGCTCTCCGTGAAGGCGAACTCAAAAGTTTTTATAATGTACGGTCATTAACACCGGAGAAGAACTCTTATGACCTTCCTGGCATCTGGGGAGGCGAAACAAGGCTCATTCTTTGCTTTCCAAAGTCCTTCACTGGGCACTCAAGATTGGAGAGAATGATCTCTTCAATGGTCACTCCTGTCTTCATTGCAGCTCTAATGGCTGCCACTTATTATGCTTCCGAAGCAGCAGCTACATCAAAGGGATCTTTTGAAGATAACTTCAGCATAATGTGGTCCGAGAATCATTTTACAACCTCTGAAGATGGACAGATCTGGTTCCTCTCTCTAGACAAAGAAACAGGTTGTGGGTTTCAAACGAAGCAGAGATACAGATTTGGTTGGTTTAGC…	MKFSALREGELKSFYNVRSLTPEKNSYDLPGIWGGETRLILCFPKSFTGHSRLERMISSMVTPVFIAALMAATYYASEAAATSKGSFEDNFSIMWSENHFTTSEDGQIWFLSLDKETGCGFQTKQRYRFGWFSMKLKLVGGDSAGVVTAYYMCTENGAGPTRDELDFEFLGNRTGQPYLIQTNIYKNGTGNREMRHMLWFDPTQDYHTYSILWNNHQIVFFVDRVPIRVFKNNGKANDFFPNEKPMYLFSSIWNADEWATRGGLEKTDWKKAPFVSSYKDFSVDGCQWEDPYPECVSTTTKNWWDQYDAWHLSDSQKLDHAWVLRNLVIYDYCKDTERFPTLPVECSLSPWD*	2	32249165	32251694	1	Phytoxome v10.2|ESTs assembly	ATGATCTCTTCAATGGTCACTCCTGTCTTCATTGCAGCTCTAATGGCTGCCACTTATTATGCTTCCGAAGCAGCAGCTACATCAAAGGGATCTTTTGAAGATAACTTCAGCATAATGTGGTCCGAGAATCATTTTACAACCTCTCAAGATGGACAGATCTGGTTCCTCTCTCTAGACAAAGAAACAGGTTGTGGGTTTCAAACGAAGCAGAGATACAGATTTGGTTGGTTTAGCATGAAACTGAAGCTGGTTGGAGGGGACTCTGCCGGTGTTGTTACAGCTTACTATATGTGTACAGAGAATGGGGCAGGGCCAACAAGAGATGAATTGGATTTTGAGTTCTTGGGGAATAGAACAGGGCAGCCATATCTTATACAAACGAATATTTATAAGAATGGG…	MISSMVTPVFIAALMAATYYASEAAATSKGSFEDNFSIMWSENHFTTSQDGQIWFLSLDKETGCGFQTKQRYRFGWFSMKLKLVGGDSAGVVTAYYMCTENGAGPTRDELDFEFLGNRTGQPYLIQTNIYKNGTGNREMRHMLWFDPTQDYHTYSILWNNHQIVFFVDRVPIRVFKNNGKANDFFPNEKPMYLFSSIWNADEWATRGGLEKTDWKKAPFVSSYKDFSVDGCQWEDPYPECVSTTTKNWWDQYDAWHLSDSQKLDHAWVLRNLVIYDYCKDTERFPTLPVECSLSPWD*	2	32249165	32251694	1	Cs2g07590.1	68.8
CitXTH19	Ciclev10023425m	ATGGGTCTCTCTCAGTTTCTAGGTTTCTTTGTGTTTCTTTTGCTTAGTCGTGTGATTGCTGCAGCGACCAAAAGTGACGTTAAATTCGATCAGAATTATTACATTACGTGGGGAAACGATCATGTGTTGTCTCTAAATCAAGGGAGAGCTATTCAGCTGTCCATGGATCGTTCTTCTGGTTCTGGGTTTGGATCGAAGTTACACTATGGTTCAGGCTTCTTTCATTTGAAGATGAAGCTACCAGACAAGGATTCCGCTGGAATTGTCACTGCTTTTTACCTTACTTCACAAGGCGATAAACATGATGAGCTGGACTTTGAATTTTTGGGCAACAGAGAAGGCAAGCCGATTACGTTACAGACGAATGTGTTTGCAAATGGTGTAGGGAACAGAGAACAA…	MGLSQFLGFFVFLLLSRVIAAATKSDVKFDQNYYITWGNDHVLSLNQGRAIQLSMDRSSGSGFGSKLHYGSGFFHLKMKLPDKDSAGIVTAFYLTSQGDKHDELDFEFLGNREGKPITLQTNVFANGVGNREQRMHLWFDPTADFHTYKILWNPHQIVFYVDDVPIRVFKNLENIGVGYPSKPMQIEASLWNGESWATDGGRTKIDWTHAPFKAHFQGFDISGCPADDDQNRSIQRCYSSQYWWNSEKFWKLHSTQKAKYENVRKNYMYYDYCSDRPRYPHPPKECLY*	3	42220156	42222744	-1								Cs5g27840.1	71.9
CitXTH20	Ciclev10024263m	ATGACATCAGTAGTACTGTTCATTCCCGCTTATTCTCTTCCAAAAAAATTCACAACCTCATACTTCGATGAAGCGTTTTCGAGGCTTTATGGAGATCAAAACTTGATCGTCCTCAAAGAAGGCAAGTCAGTCCGAATCTCACTCGATGAACACACCGGCTGTGGCTTCAAATCCAGAAGCACCTATCAATACGCATTCTTCAGTACTTCCGTTAAACTACCTGCGGCTAATTACACAGCAGGAGTTGTTGTCACGTTTTACACCTCAAACGGTGACGTTTACAAGGATTCTCACGACGAACTTGATTTCGAGTTCTTGGGACATGCTAACAATGGTAGTTGGGTGCTGCAAACAAATCTCTATGGCAATGGAAGCATTGGGAGAGGCCGTGAAGAGAGG…	MTSVVLFIPAYSLPKKFTTSYFDEAFSRLYGDQNLIVLKEGKSVRISLDEHTGCGFKSRSTYQYAFFSTSVKLPAANYTAGVVVTFYTSNGDVYKDSHDELDFEFLGHANNGSWVLQTNLYGNGSIGRGREERYSLPFDPSENFHNYSILWTEKTTVFYVDYVPIRVTQKVEAMAGDYPSKPMSLYATIWNGSDWATGGGKYKVDYAYAPFVSQYSNFVLQACSNSDCDDSLTTEERNKMKEFRSKYVTYSYCVDSKRYPIPLP	3	47779475	47780266	1	Phytozome v10.2|C. sinensis	ATGGCTGCTTCTTTTAAAGAGTTGATTTTGTGTCTGTTTTTCATGACATCAGTAGTACTGTTCATTCCCGCTTATTCTCTTCCAAAAAAATTCACAACCTCATACTTCGATGAAGCGTTTTCGAGGCTTTATGGAGATCAAAACTTGATCGTCCTCAAAGAAGGCAAGTCAGTCCGAATCTCACTCGATGAACACACCGGCTGTGGCTTCAAATCCAGAAGCACCTATCAATACGCATTCTTCAGTACTTCCGTTAAACTACCTGCGGCTAATTACACAGCAGGAGTTGTTGTCACGTTTTACACCTCAAACGGTGACGTTTACAAGGATTCTCACGACGAACTTGATTTCGAGTTCTTGGGACATGCTAACAATGGTAGTTGGGTGCTGCAAACAAAT…	MAASFKELILCLFFMTSVVLFIPAYSLPKKFTTSYFDEAFSRLYGDQNLIVLKEGKSVRISLDEHTGCGFKSRSTYQYAFFSTSVKLPAANYTAGVVVTFYTSNGDVYKDSHDELDFEFLGHANNGSWVLQTNLYGNGSIGRGREERYSLPFDPSENFHNYSILWTEKTTVFYVDYVPIRVTQKVEAMAGDYPSKPMSLYATIWNGSDWATGGGKYKVDYAYAPFVSQYSNFVLQACSNSDCDDSLTTEERNKMKEFRSKYVTYSYCVDSKRYPIPLPECKNDSF*	3	47779433	47780290	1	orange1.1t00547.1	100
CitXTH21	Ciclev10022200m	ATGGCGGATCCAGTTGTCCAGAGTCTCCATCAAACTGAACCCATAAAAGAAATCGCCATAGATTACACCCCGGAAGCATGCACTCACTGCGCAGACTCCAATTCGATCACACTCACCTTCGATCACCGCGGCGGAGCCAGGTGGCGCTCCACCACTCGCTTCCTCTACGGCACCTTCAGCTCCCTGATCCAGTGCCCCAAAGGCAACACTAGTGGCCTCAACTTCAACATCTACCTTTCTTCTCTAGAAGGCGACAAATCCCAAGACGAAATCGACTTTGAATTCCTTGGCAAGGACAAGACTATCGTTCAAACCAATTATTACACTACAGGAACCGGGAATAGAGAGGAGATTCATGATCTGGGGTTCGATTGTTCTGAAGGATTTCATGAGTACGTG…	MADPVVQSLHQTEPIKEIAIDYTPEACTHCADSNSITLTFDHRGGARWRSTTRFLYGTFSSLIQCPKGNTSGLNFNIYLSSLEGDKSQDEIDFEFLGKDKTIVQTNYYTTGTGNREEIHDLGFDCSEGFHEYVIKWGPDLIQWLIDGKVVRRAERNEGEGFPNKPMFLYASVWDASHIDKARWCGPYVGCDAPYVCLYKDIHVPVATAVECPCDS*	3	49388059	49389305	-1	aCL3322Contig1							orange1.1t00297.1	100
CitXTH22	Ciclev10033360m	ATGACTAGATTAGCATGCATGACGCCTGTTTTGAGAGCTGATACAACTAGCTTCAATGACAACTACCATGTTACATGGGGACATGATCATGCCTTGCTTCTGAACCAAGATAGGGAAATTCAGCTTACCTTGGACCAAAAATCTGGAGCTGGGTTCGAGTCGAAGATGAGGTACGGGTCCGGGTTATTTCATATCAGAATGAAGATACCAGACAAGAATTCTACAGGAGTTCTTACGAGCTTCTATTTAGCTTCGCGTTCGAGCCATCATGATGAGATTGATTTAGAGTTCTTGGGAAACAATGGGCCACCTTATAAATTGCACACCAATTTGTACATAAATGGTCAAGGTGGCAGAGAGCAACAAATTCTTCTTTGGTTTGATCCCACAAAGGATTTC…	MTRLACMTPVLRADTTSFNDNYHVTWGHDHALLLNQDREIQLTLDQKSGAGFESKMRYGSGLFHIRMKIPDKNSTGVLTSFYLASRSSHHDEIDLEFLGNNGPPYKLHTNLYINGQGGREQQILLWFDPTKDFHSYKILWNEHQIVFFVDNVPIRVYRNNIRKKVSFPSQPMHIFASIWHAEGWASDGRKTDWHQAPFHAHYQDFHVDGCVLQDHNIRECHSPKFWWNAEKYRKLNPDQEREYRNVRKKHLVYDYCSSKSSSHYSECHK*	4	12318897	12320357	1								orange1.1t02575.1	83.6
CitXTH23	Ciclev10032164m	ATGGCTCTTTTACTACTAAACAATCTAATTTTAGCATTCCTCTTGTTCTTTTGCATTATGGCACCCAAGGTTTCTTCACACAACAGGGCTTACGCGGCCCCAAGTGTTGCACGCTTGACAGATCTTTTTGGTCACGTCTCAGTTGATCAGGGCTTTTCCACTTTCTTCGGAGGCTCAAATGTCAAGCGGATCAATAATGGGTCCATGGCCACTCTTGCTCTTGACAAATCCTCAGGCTCTGGATTGGTCTCCAGGAACAAATATTACCACGGATTCTTCAGTGCCGCTATAAAGTTGCCATCTGGTCTCTCATCCGGAGTTGTACTTGCCTTCTACTTGTCTAATGCAGATAGCTATCCGCACAACCATGATGAAATTGATATTGAATTGCTTGGTCAT…	MALLLLNNLILAFLLFFCIMAPKVSSHNRAYAAPSVARLTDLFGHVSVDQGFSTFFGGSNVKRINNGSMATLALDKSSGSGLVSRNKYYHGFFSAAIKLPSGLSSGVVLAFYLSNADSYPHNHDEIDIELLGHDKRNDWVLQTNIYANGGVSTGREEKFYFWFDPTAQHHYYSIIWNSHHIVFLVDNVPLREFPNTGAFSSVYPSKPMSVYVTIWDGSQWATHGGKYPVNYKYAPFVASLAEMEMAGCVLSNSASAPASCSKGSASSLDPVDGQQFTTLSKQQVAALDWSRRKLMFYSYCKDTTRFKVMPPECK*	4	22801203	22802540	1	aC02014B11SK_c							Cs7g08460.1	100
CitXTH24	Ciclev10001649m	ATGGATTGGTTTCTTTGCTCTCAATCAAAAAAATCATCAGCACCCTTCACTCTAATTCTAATTCTGTTGTGTTGCTGCTCATCACCATCACTTGTGTTCACATTCGCAAACGCATCATCATCACCTGCTTTCAACCTCACCACCATCTCTTTCGATGAAGGCTACTCTCATCTCTTCGGCGACGGCAATCTCATTCGCTCCCCCGACGGCAAGAACGTTCGTCTCCTCCTCAACCGCTTCTCCGGGTCCGGTTTTGTTTCGTCAAAATTGTACAATCACGGGTTCTTTAGCGCGATGATCAAGTTGCCATCGGATCACACGGCTGGCTTATGTGTTGCATTCTATACATCAAATGGAGACGTGTTCCCAAAAACACACGACGAATTAGACTTTGAGTTT…	MDWFLCSQSKKSSAPFTLILILLCCCSSPSLVFTFANASSSPAFNLTTISFDEGYSHLFGDGNLIRSPDGKNVRLLLNRFSGSGFVSSKLYNHGFFSAMIKLPSDHTAGLCVAFYTSNGDVFPKTHDELDFEFLGNVAGKPWRFQTNFYGNGSTARGREERYQLWFDPTKQFHRYSILWTSNNIIFYVDEVPIREVVRSTAMGGDFPSKPMSLYTTIWDASNWATSGGKAKVNYKYAPFTSEFKDFVLEGCPVDPIEQVPSSNCQDTDSRLAEKGLSVITPAGRRAMRRFRERYIYYSYCYDTIRYPVPLPECVLVPSERQRFKDTGRLKFGGSHKSHRHRSRRQPGASNSEDPDM*	5	26615177	26617732	1	aIC0AAA99CH05RM1_c							Cs3g08950.1	100
CitXTH25	Ciclev10013680m	ATGTCGTTGTCGTCTTCTCTTAGGGTTGCCGCTGCATTATTGTTCATTTGTAATTGTTTGGTGGCAGTCTCAATTGCTACTGATTTAGTGAAAGACGTCGACATTGATGAATGGGGAAAAGAACACGTTAAAGTCTCCGAGGATGGCGCATCCCTATCCCTTTCCCTCGACAAAGACTCAGGCTCAGGCTTCCAAACCAAGGAAGAGTACCTATTCTCGAGATTCGACGTGGAGCTAAAGTTAAGCCCAGGCTATTCCGCCGGTGTTGTGACAACATTTTACTTATCGTCTCTCGGGACAAAACACGACGAGATAGATTTTGAGTTCTTGGGAAATGTTACCGGAGAACCAATCACACTCCACACCAACATTTACTCCCAAGGCGAAGGCCGGAAGGAG…	MSLSSSLRVAAALLFICNCLVAVSIATDLVKDVDIDEWGKEHVKVSEDGASLSLSLDKDSGSGFQTKEEYLFSRFDVELKLSPGYSAGVVTTFYLSSLGTKHDEIDFEFLGNVTGEPITLHTNIYSQGEGRKEKTYNLWYDPSEEYHLYSVVWTPKRIVFMVDDKPIRVHNNHEKDLNLPYPTKQPMRVYASIWNGDDWATKGGSVKINWQYAPYVAHYRNLNITEYEQGEDHPLTQEDKDYIEMVETEHMIYNYCDAYEKELVRECDVPIY*	6	1125734	1126552	1								Cs6g02160.1	99.6
CitXTH26	Ciclev10012353m	ATGGCTCTCTTCCTATTACTTATTCTCAGCAGCCTCATTTTCCCTTCAAGCTTTGCTTATTGGCCACCTTCACCTGCCTACTGGCCAAGTTCCAAGTTCAGCTCTATGAGTTTCTACAAAGGATTCAGAAATCTCTGGGGTCCTCAGCATCAAAGAGATGAACAAAATGCATTAACAATCTGGCTTGATAGTTCCTCAGGAAGTGGGTTCAAATCAGTGAAGCCTTTCAGGTCTGGCTATTTTGGAGCATCCATTAAACTTCAACATGGTTACACTGCTGGAGTCATAACAGCATTTTATCTATCCAACAATGAAGCTCATCCAGGTCGGCATGATGAAGTTGACATTGAGTTTCTTGGAACAACATTCGGGAAGCCTTATACTTTACAGACTAATGTT…	MALFLLLILSSLIFPSSFAYWPPSPAYWPSSKFSSMSFYKGFRNLWGPQHQRDEQNALTIWLDSSSGSGFKSVKPFRSGYFGASIKLQHGYTAGVITAFYLSNNEAHPGRHDEVDIEFLGTTFGKPYTLQTNVYIRGSGDGKIIGREMKFHLWFDPTKDFHHYAILWSPKELIFLVDDVPIRRYPRKSAATFPLRPMWVYGSIWDASSWATEDGKYKADYRYQPFVARYTDFKACGCTAYAPAWCRPVSVSPFHSGGLSRQQYWAMRWVQSHHLVYDYCRDQKRDHFLTPECY*	6	4823523	4825584	-1	aIC0AAA82BA04RM1_c							orange1.1t00876.1	100
CitXTH27	Ciclev10013733m	ACCTCAAAGGGCGATTTCAATACGGACACCAAAATCACATGGGGAGATGGACGGGCGAAGATAACGGAAGGAGGCAAAGCCCTCACCCTCTCCATCGACAAAAAGTTAGGCTCCGGCTTCCAGTCCAAGAAAGATTACCTATTTGCGAGATTCGACGTCGAAATGAAACTAATTCCAGCCAACGCAGCCGGCCTTGTCACCACGTTTTACTTATCATCCCTCGAAGGATCACACGACGAAGTCGACATGGAATTCCTGGGCAATGTAACAGGGGAACCCTACACATTGCACACCAACATTTACGCGCAAGGGGAAGGCCACAGAGAACGAGGTTTCCACCTCTGGTTTGATCCCTCCGCAAAGTTCCACCAGTACTCTATCGTGTGGAATCCTGAACGG…	TSKGDFNTDTKITWGDGRAKITEGGKALTLSIDKKLGSGFQSKKDYLFARFDVEMKLIPANAAGLVTTFYLSSLEGSHDEVDMEFLGNVTGEPYTLHTNIYAQGEGHRERGFHLWFDPSAKFHQYSIVWNPERIIFMVDNKAIRVHENLANLGVPFPAKQPMWLIASLWNGDQWATQKGRIKANWTDAPYTAHYRNLVIAKHAGNNQTLTNLDEKNIRSVQDKFMIYDYCDYGVHPLECEKQNSQANEKPKNSNSGPAPKN*	6	22074334	22075119	-1	FGENESH	ATGTCTTTATCTTCATCGTCGTCGTTGTTGCTGTTGTTTTCTGTATCGATATGTTGTTTTGTAGTAACCTCAAAGGGCGATTTCAATACGGACACCAAAATCACATGGGGAGATGGACGGGCGAAGATAACGGAAGGAGGCAAAGCCCTCACCCTCTCCATCGACAAAAAGTTAGGCTCCGGCTTCCAGTCCAAGAAAGATTACCTATTTGCGAGATTCGACGTCGAAATGAAACTAATTCCAGCCAACGCAGCCGGCCTTGTCACCACGTTTTACTTATCATCCCTCGAAGGATCACACGACGAAGTCGACATGGAATTCCTGGGCAATGTAACAGGGGAACCCTACACATTGCACACCAACATTTACGCGCAAGGGGAAGGCCACAGAGAACGAGGT…	MSLSSSSSLLLLFSVSICCFVVTSKGDFNTDTKITWGDGRAKITEGGKALTLSIDKKLGSGFQSKKDYLFARFDVEMKLIPANAAGLVTTFYLSSLEGSHDEVDMEFLGNVTGEPYTLHTNIYAQGEGHRERGFHLWFDPSAKFHQYSIVWNPERIIFMVDNKAIRVHENLANLGVPFPAKQPMWLIASLWNGDQWATQKGRIKANWTDAPYTAHYRNLVIAKHAGNNQTLTNLDEKNIRSVQDKFMIYDYCDYGVHPLECEKQNSQANEKPKNSNSGPAPKN*	6	22074334	22075185	-1	Cs6g16990.1	98.6
CitXTH28	Ciclev10026210m	ATGGCTATCCTAAGAAATGCAATAGCATTATTTGTGTTGCTTTACTGTCTTGTATCCTGCTCTTGCGTTTTAGGGCGACCGGCTACTTTTCTTGAGGATTTTAAAGTCACATGGTCCGATGCCCATCTCAGGCAAATCGAGGGAGGGAGGGCCATCCAGCTAGTTCTAGACCAAAATTCAGGATGTGGGTTTGCTTCCAAAAGGCAGTACTTGTTCGGGCGTGTAAGCATGAAGATCAAGCTCGTTCCTGGAGACTCTGCTGGAACTGTCACTGCATTTTATATGAATTCCAACACCGAAAATGTGAGAGACGAGCTTGATTTTGAGTTCCTGGGAAACCGAACGGGTCAGCCTTACACGGTCCAGACCAATATCTATGCAAATGGAAAAGGCGATAGA…	MAILRNAIALFVLLYCLVSCSCVLGRPATFLEDFKVTWSDAHLRQIEGGRAIQLVLDQNSGCGFASKRQYLFGRVSMKIKLVPGDSAGTVTAFYMNSNTENVRDELDFEFLGNRTGQPYTVQTNIYANGKGDREQRVNLWFDPAADYHLYTILWNHHHIVFYVDDVPIRVYKNSGRAPFPMNQPMGVYSTLWEADDWATRGGLEKIDWSKAPFYAYYRDFDIEGCPVPGPANCASNPGNWWEANNYQALTAMEARRYRWVRLNHMIYDYCTDKSRYPVPPPECLAGI*	7	4531276	4532990	-1	aCL6772Contig1							Cs1g21130.2	100
CitXTH29	Ciclev10029863m	ATGCATCATACCATCTTGTTAACCAAAGCCATGACTAATTTACTCAAATTCATTGGTGTTATTGGGTTTCTTAGTGCATATCTTCTTCAAATTTCAAGAGCTTCTGTTGTTTCGACCGGCGATTTCAACAAGGACTTTTTTGTAACTTGGTCTCCAAGCCATGTAAACACTTCTGAAGATGGCAAGGCAAGGAGCTTGAAGCTCGATCAAGAATCTGGTGCTGGTTTTTCTTCGAACCAAATGTTCTTATTTGGGCAACTAGACATGCAAATAAAGCTAGTACCTGGTGATTCTGCAGGCACAGTTGTAGGCTTTTACATGGCATCTGATCAACCAAACAGAGATGAAATAGACTTTGAATTTCTTGGCAATGTAAGTGGGCAGCCCTATATCCTTCAA…	MHHTILLTKAMTNLLKFIGVIGFLSAYLLQISRASVVSTGDFNKDFFVTWSPSHVNTSEDGKARSLKLDQESGAGFSSNQMFLFGQLDMQIKLVPGDSAGTVVGFYMASDQPNRDEIDFEFLGNVSGQPYILQTNIYADGSDNREQRIYLWFDPTKDFHTYSILWNLHQIVLMVDSVPIRTYRNHANEGVPYPRWQPMSIKISLWNGDSWATRGGQDKIDWSQGPFVASFRNYKIDACVWNGNPRFCRAGSPTNWWNQKQFSTLTSIQRRLFKWVRNYHVIYDYCQDNQRFQNNLPKECSLSKY*	8	1597560	1598760	-1								Cs8g03550.1	100
CitXTH30	Ciclev10028851m	ATGACGAATATACGTTTTTCATTTGATCGAAAAGATTTTGTCACTGAAGCTAAACTTTGTTTTGTGTTTTGCAGAGAAATGGCTTCAAAAATATGGATTCTGCTTCTGGGTATTTTGTTTATGGTGTCAGCAACAATGGGAGTTCCACCAAGAAAACCTGTGAATGTCCCATTCGGCAGAAACTACATGCCCACTTGGGCTTTTGATCACATCAAATACTTCAATGGTGGCTCTGAGATTCAGCTTCATCTTGACAAATACACGGGCACTGGCTTCCAATCCAAAGGAAGTTACTTGTTCGGCCATTTCAGTATGCAAATGAAATTGGTTCCGGGGGATTCGGCTGGATCTGTCACTGCTTTTTATCTGTCTTCTCAAAACTCAGAGCATGATGAAATC…	MTNIRFSFDRKDFVTEAKLCFVFCREMASKIWILLLGILFMVSATMGVPPRKPVNVPFGRNYMPTWAFDHIKYFNGGSEIQLHLDKYTGTGFQSKGSYLFGHFSMQMKLVPGDSAGSVTAFYLSSQNSEHDEIDFEFLGNRTGQPYILQTNVFTGGKGDREQRIYLWFDPTKAYHFYSVLWNMYQIVFFVDDIPIRVFKNCKDLGVRFPFNQPMKIYSSLWNADDWATRGGLEKTDWSKAPFIASYKGFHIDGCEASVQAKYCATQGKRWWDQKEFQDLDAFQYRRLKWVRSKFTIYNYCTDRSRFPVLPPECRRDRDI*	8	14789924	14791768	-1	aCL6641Contig1							Cs8g12020.2	99.7
CitXTH31	Ciclev10028945m	ATGGCTTCCATTCTCTATCTCCTTCTTCCTCTTCTCATTCTCATGACCATTTCTTCAGTTAGCAATGGTCAGGGTCCACCTTCACCAGGCTACTACCCCAGCTCAAGAATCAATTCAATAGGGTTTGATCAGGCATTTAGAAACTTATGGGGTCCTCAGCATCAAAGAGTAGACCAAGGCACCTTAACAGTCTGGCTTGATAGCTCCTCAGGAAGTGGGTTCAAGTCACTTCATTCATATCGGTCGGGTTACTTTGGTGCTTCCATCAAGCTTCAGCCTGGTTACACTGCTGGAGTAATTACCTCTCTCTATCTTTCAAACAACCAAGATCACCCGGGGAACCACGACGAAGTCGATATCGAGTTCCTTGGAACCATTCCCGGTAAGCCCTATACTTTG…	MASILYLLLPLLILMTISSVSNGQGPPSPGYYPSSRINSIGFDQAFRNLWGPQHQRVDQGTLTVWLDSSSGSGFKSLHSYRSGYFGASIKLQPGYTAGVITSLYLSNNQDHPGNHDEVDIEFLGTIPGKPYTLQTNVYIRGSGDGRLIGRELRFHLWFDPTQDFHHYAVLWSPSELIFFVDDVPIRRYPRKSDATFPLRPMYLYGSIWDASSWATEEGRYKADYKYQPFVGQYRNFKIAGCTADGPSGCHPPPASPSGSGVLSQQQVAAMQWVQRNYLVYNYCYDPKRDHTEIPEC*	8	21325200	21327234	-1	aIC0AAA24CH02RM1_c							Cs8g15720.1	98.6
CitXTH32	Ciclev10005561m	ATGGGTTATCATTATTCTTGTAATGGGTTGTTGTTATTGGTGAGTGTTTTGATGGTTGTTGCCTCATCAGCTGTGGGTAGCTTCTATCAAGACTTTGATTTAACATGGGGTGATAAGAGAGCTAAGATTTTCAATGGCGGCCAACTTCTTTCTCTGTCTCTAGACAGAGTTTCTGGCTCTGGTTTTCAGTCCAAGAGAGACTACTTATTTGGCAGAATTGATATGCAGCTCAAGCTTGTTGCTGGTGACTCTGCTGGCACTGTCACTGCCTACTATCTGTCTTCGCAAGGGCCGACTCATGATGAGATTGATTTTGAGTTCTTGGGAAATGTGAGCGGTCAGCCTTACATTCTTCACACAAATATATTCGCTCAGGGTAAAGGCAACCGGGAGCAACAA…	MGYHYSCNGLLLLVSVLMVVASSAVGSFYQDFDLTWGDKRAKIFNGGQLLSLSLDRVSGSGFQSKRDYLFGRIDMQLKLVAGDSAGTVTAYYLSSQGPTHDEIDFEFLGNVSGQPYILHTNIFAQGKGNREQQFYLWFDPTRNFHTYSVIWKPQHVIFLVDNIPIRVFKNAESLGVPFPKNQPMKIYSSLWNADDWATRGGLVKTDWTKAPFTAYYRNFRAIPCNNCGSKWSSSSSVSDAQRQWQARDELDATSRRRLRWVQKYFMIYNYCTDLKRFPQGFPSECRQH*	9	17424110	17425707	-1								orange1.1t02385.1	99.3
CitXTH33	Ciclev10010859m	ATGCAGCTTAAGCTTGTCCCTGGCAACTCTGCTGGTACTGTCACTGCTTATTATTTAAAATCACCGGGATCAACATGGGATGAGATAGACTTTGAATTCTTGGGAAATTTAAGTGGTGACCCTTATACTCTTCACACAAATGTATTCACAAATGGTAAAGGTGACAGAGAACAACAATTTCACCTCTGGTTTGACCCCTCTGCTGCTTTTCACACCTATTCCATCCTCTGGAATCCTCAGCGCATTGTCTTCTTTGTTGATGGCACCCCCATTAGAGAATTAAAGAACTCAGAGTCTATTGGAGTTCCATTCCCAAAGAATCAGCCAATGAAAATATACTCATCTCTCTGGAATGCTGATGACTGGGCTACAAGAGGTGGCCTTGTCAAGACAGATTGG…	MQLKLVPGNSAGTVTAYYLKSPGSTWDEIDFEFLGNLSGDPYTLHTNVFTNGKGDREQQFHLWFDPSAAFHTYSILWNPQRIVFFVDGTPIRELKNSESIGVPFPKNQPMKIYSSLWNADDWATRGGLVKTDWTHAPFTASYRNFKANNACVWSNGKSSCASTSFRSRNSWLSQELDSTSQNRLKWVQKNYMIYNYCTDTKRFPRGTPKECRTS*	73	24581	25569	-1	aC05133B06SK_c|FGENESH	ATGCCGACAAGGAGCAACTTGCAACTTGTTATTACATCTTCCATATTTGCACGTAAAGTTGTTGAAAAACTAAAAAATTTTGACATCACTTGGGGAGATGGGCGTGCGAAGATACTCAACAACGGCCAGCTTCTTACTCTGTCCCTTGATAAAGCCTCTGGCTCAGGATTCCAGTCCAAGAATGAGTATCTATATGGCAAGATTGACATGCAGCTTAAGCTTGTCCCTGGCAACTCTGCTGGTACTGTCACTGCTTATTATTTAAAATCACCGGGATCAACATGGGATGAGATAGACTTTGAATTCTTGGGAAATTTAAGTGGTGACCCTTATACTCTTCACACAAATGTATTCACAAATGGTAAAGGTGACAGAGAACAACAATTTCACCTCTGGTTT…	MPTRSNLQLVITSSIFARKVVEKLKNFDITWGDGRAKILNNGQLLTLSLDKASGSGFQSKNEYLYGKIDMQLKLVPGNSAGTVTAYYLKSPGSTWDEIDFEFLGNLSGDPYTLHTNVFTNGKGDREQQFHLWFDPSAAFHTYSILWNPQRIVFFVDGTPIRELKNSESIGVPFPKNQPMKIYSSLWNADDWATRGGLVKTDWTHAPFTASYRNFKANNACVWSNGKSSCASTSFRSRNSWLSQELDSTSQNRLKWVQKNYMIYNYCTDTKRFPRGTPKECRTS*	73	24581	26439	-1	Cs4g03220.1	72.1
CitXTH34	Ciclev10010858m	ATGGCTTCAATGTTGCATTTGTTTCTAGTGCTTGGTACTTTGATGGTTGCCTCTGCTGGTAGCTTCTACCAAGATTTTGACATCACTTGGGGAGATGGGCGTGCCAAGATACACAACAACGGCCAGTTTCTTACGCTTTCCCTTGATAAAGCCTCTGGCTCAGGTTTCCAGTCCAAGAATGAATATCTATTCGGCAAGATTGATATGCAACTCAAACTAGTCCCTGGCAACTCTGCTGGCACTGTTACTGCTTATTATTTAAAATCACCAGGATCAACATGGGATGAGATAGACTTCGAATTCTTGGGGAATTTAAGTGGCGATCCTTATACTCTTCATACGAATGTATTCACAAATGGAAAAGGAAACAGAGAGCAACAATTTCACCTCTGGTTTGAC…	MASMLHLFLVLGTLMVASAGSFYQDFDITWGDGRAKIHNNGQFLTLSLDKASGSGFQSKNEYLFGKIDMQLKLVPGNSAGTVTAYYLKSPGSTWDEIDFEFLGNLSGDPYTLHTNVFTNGKGNREQQFHLWFDPTAAFHTYSILWNPQRIVFSVDGTPIREFKNSESIGVPFPKNQPMRIYSSLWNADDWATRGGLVKTDWTHAPFTASYRNFKADACLWSNGKSSCASSKSRSRAWFSQELDSSSQNKLKWVQKNYMIYNYCTDTKRFPQGLPVECRTA*	73	30865	31932	-1	aC31108E09EF_c|aC05133F09SK_c							Cs4g03210.1	100
GH28s Polygalacturonases
CitPG1	Ciclev10010440m	GATCTACTTATTACCAGCAGCTTTTTAATTCTGTGCATTGCTATATCGAGCTTAGTAGGCATTGGAGATGGCCGGAACACTTTTAACGTTGTTGATTTCGGTGCGATTGGAGATGGCAAAACTGATGATTCTGATGCCTTTGCAAAAGCGTGGACAGATTTCTGTTCAGCTACTGGAGACTCATCAACACTGGAAATACCCGCTAATAAAGCATTCTTATTACAGTCAACTACATTTCGTGGTCCTTGCAAGTCCAATAGTGTTAATATTCAGGTTTCAGGGACCATTGTGGCACCTGACTCAAAATCCTGGAAACAATGTGGCAGCCAATGCTGGCTGTCTCTCTACGATGTGCAAGGTCTCAGTATTGATGGATCAGGAACAATTGATGGCAACGGC…	DLLITSSFLILCIAISSLVGIGDGRNTFNVVDFGAIGDGKTDDSDAFAKAWTDFCSATGDSSTLEIPANKAFLLQSTTFRGPCKSNSVNIQVSGTIVAPDSKSWKQCGSQCWLSLYDVQGLSIDGSGTIDGNGRGWWNQAVYFHNCNNLQVKGITIVNSPKSHISINTCNGVSVSNIHIDSPEDSPNTDGIDISSSTQVNILDSSIKSGDDCVAINGGSSKINITGVACGPGHGISVGSLGLDGADDKVEEVHVRNCNFTGTQNGARIKTSPGGSGYARGISFEHITLIESKNPIIIDQHYCVGGGGCKGTSAVNVSEVTYSDVRGSSADEKAITFDCSEEGCFGIKMEQVSITSSVPGKETIAYCQNAHGTSSSTSPHVGCLTDVESQIAMVKCTRYK…	1	1886650	1889832	1	FGENESH	ATGGATCTACTTATTACCAGCAGCTTTTTAATTCTGTGCATTGCTATATCGAGCTTAGTAGGCATTGGAGATGGCCGGAACACTTTTAACGTTGTTGATTTCGGTGCGATTGGAGATGGCAAAACTGATGATTCTGATGCCTTTGCAAAAGCGTGGACAGATTTCTGTTCAGCTACTGGAGACTCATCAACACTGGAAATACCCGCTAATAAAGCATTCTTATTACAGTCAACTACATTTCGTGGTCCTTGCAAGTCCAATAGTGTTAATATTCAGGTTTCAGGGACCATTGTGGCACCTGACTCAAAATCCTGGAAACAATGTGGCAGCCAATGCTGGCTGTCTCTCTACGATGTGCAAGGTCTCAGTATTGATGGATCAGGAACAATTGATGGCAAC…	MDLLITSSFLILCIAISSLVGIGDGRNTFNVVDFGAIGDGKTDDSDAFAKAWTDFCSATGDSSTLEIPANKAFLLQSTTFRGPCKSNSVNIQVSGTIVAPDSKSWKQCGSQCWLSLYDVQGLSIDGSGTIDGNGRGWWNQGEDGCNRPKAVYFHNCNNLQVKGITIVNSPKSHISINTCNGVSVSNIHIDSPEDSPNTDGIDISSSTQVNILDSSIKSGDDCVAINGGSSKINITGVACGPGHGISVGSLGLDGADDKVEEVHVRNCNFTGTQNGARIKTSPGGSGYARGISFEHITLIESKNPIIIDQHYCVGGGGCKGTSAVNVSEVTYSDVRGSSADEKAITFDCSEEGCFGIKMEQVSITSSVPGKETIAYCQNAHGTSSSTSPHVGCLTGTVF	1	1887242	1889599	1	Cs7g05300.1	73.7
CitPG2	Ciclev10008093m	ATGGTGGAGATATTATCGTTAGGGCGGTTTCACTTGCACCAAAACCGACCGGACCTGCGCCGGTGGGTCCCAGCATTCCTCTCCTCTCACAAGACCCTCTTCACCGTGCTGTGGCTGGCCGCCTTCGCTTCTGTCTTCATCTGGCAGCGAAACGCCGTCGTTGGGGGCTTCTCGTTTCTCAGATGGGGCGTGGCTTCGAGGCCGATCCCAAGGTTGAGACCCGTGGCGTTCAACTTGACGGATTTCGGCGGAGTCGGCGACGGCGTTACTCTCAATACGGAGGCCTTTCAGAGGGCGGTTTACGCGATTTCGAAGCTCGGAAAGAAAGGCGGTGGCCAGCTTAATGTGCCGCCTGGAAGGTGGCTTACTGCTCCTTTTAATTTAACTAGTCACATGACT…	MVEILSLGRFHLHQNRPDLRRWVPAFLSSHKTLFTVLWLAAFASVFIWQRNAVVGGFSFLRWGVASRPIPRLRPVAFNLTDFGGVGDGVTLNTEAFQRAVYAISKLGKKGGGQLNVPPGRWLTAPFNLTSHMTLFLADDAEILAIENEKYWPLMPPLPSYGYGREHHGPRFGSFIHGQNLKDVVITGHNGTINGQGQAWWKKYRQKLLNNTRGPLVQIMWSSDILISNITLRDSPFWTLHPYDCKNVTIRNVTILAPIFEAPNTDGIDPDSCEDMVIEDCYISVGDDAIAIKSGWDQYGIAYGRPSMNILIRNLVVQSMVSAGVSIGSEMSGGVSNVTVENLLVWSSRRAVRIKTAPGRGGYVQNINYRNLTFDNVRVGIVIKTDYNEHPDEGYDPKAL…	1	24602749	24608633	1	aCL852Contig2							Cs4g07140.1	99
CitPG3	Ciclev10015111m	ATGGCGGCTGCTTGTAATAATCTTACGAGCCTTGCATTAACAGTTCTCACGGCATTCCTTCTGGGGTCTTCTAGTTTTGAAACATGCAGCGCTAGAGATCAAACCAAGCATTCGATACAAAGCAGCACAGCTCACGAGCCATCCCTCCAGGGACGCAAATTGTCAAAGTTCACGAGTTATGCTTATTCCGGAGCTCCGGAAGAAATGGCGACGAGCTCTGCTATTTTCAATGTGTTGAGCTACGGAGCCAAAGGTGACGGTCGCACGGATGACACAAAGGCATTTGAAGCAGCATGGGCAGCGGCTTGTAAGATAGAGGGAGCAACCATGGTGGTTCCATCTGGTTCCGTATTCCTTGTGGGACCCATTTCCTTCTCGGGCCCTACCTGTCAACCAAAC…	MAAACNNLTSLALTVLTAFLLGSSSFETCSARDQTKHSIQSSTAHEPSLQGRKLSKFTSYAYSGAPEEMATSSAIFNVLSYGAKGDGRTDDTKAFEAAWAAACKIEGATMVVPSGSVFLVGPISFSGPTCQPNILFQLDGKIIAPTNSGAWGSGILQWLEFSKLKGITLTGKGIIDGQGSVWWHDAPSSYGTADDSASSELKGNMPGTKPTALRFYGSSGVTVTGITIQNSQQTHLKFDDCTAVQVSDFTASSPGDSPNTDGIHLQNSQDVTIYSSTLACGDDCVSIQTGCSNIDVHNVNCGPGHGISIGSLGKDNTKACVSKITVRDVTMHDTMTGVRIKTWQGGSGLVQQVTFSNIQVNNVKSPIVIDQYYCEKSSCHNESSAVQVSNIAYVNIRGT…	2	9356315	9358708	-1								Cs2g27910.1	99.2
CitPG4	Ciclev10015423m	ATGGCGAAATCGAATATCCTGGCTTTGTTCCTATCATTACTGATGTTATCGGCTGCTGCAGCTTTGGACGTCGATGTGACAAAACACGGTGCAAAGCAAAATGCAGATATAAGCCAGGCTTTAAGGGATGCTTGGAAAGAAGCCTGTGCAGCAACAACACCAAGCAAAGTGTTGATCCCGCAAGGGACGTATCAATTAAGTCCAGTGACCATGGAAGGCCCATGCAAGGCTGCTATTGAGCTTCAGGTTAAAGGCACCCTTAAAGCCCTAACAGATCCTGCAAATGTCAAGGACGCTGGCAGTTGGGTTTCATTCAATAAAATCGAACATCTGACGGTATCCGGCGGTGGAACTTTTGATGGCCAAGGAGCCGTCGCTCCTTCTGAATGTGAAAAGGAT…	MAKSNILALFLSLLMLSAAAALDVDVTKHGAKQNADISQALRDAWKEACAATTPSKVLIPQGTYQLSPVTMEGPCKAAIELQVKGTLKALTDPANVKDAGSWVSFNKIEHLTVSGGGTFDGQGAVAPSECEKDDYCKKRPIVSNLSFNAITNSVVQDVTSLNSKQFHINVIGAKNFTFQRVTVTAPEESLNTDGIHVGRSSGVTITDSKIGTGDDCISIGDGTQQMEINKIDCGPGHGISVGSLGKYQNEQPVVGIRVRECNISNTSNGVRIKTWPASYPGTASDLHFEDIKMNNVSNPILLDQVYCPHNQCNAKVPSRVKLDRVSFKNIRGTSATAVAIKLACSGGVPCEGVELADISLTYTGPEGPIKSECTNIQPKTSGKMNPPPCIASATPSGSA…	2	23744323	23745958	1	aIC0AAA80DE05RM1_c							Cs2g19950.1	100
CitPG5	Ciclev10017883m	AGTCACAAGGAGCAAATTTGGATTTCCAAAAACCTGAAGCACAGGCCTCAGAAGCAGAGGCCTCAAAAGGTTTTAACTGTTGTCAGACAACCTGAACCAGATGCCGCGCGATCACAAGGTGCAGTTTTTTATGTTTTAAGTATGGAGCAAAGGCCGATGGCAACTCAGATGATAGCTATTGCAAGTGCCTGGAAAGAGGCATGCACATCTGAAAATCTGAGCACTGTTGTAATTTCGAAAGGAAACTACATGGTTGGTTCAGTAACGTTCAAAGGACCCTGCAAATCTCCTATAACTCTTCATATTGAAGGAAAACTGAAGGCCCCAGTAGAATTAGAAAGGCTCAGTTCACAGGACGGATGGATCGTTTTCCAGGACATTGATGGGTTACAAGTCTCT…	SHKEQIWISKNLKHRPQKQRPQKVLTVVRQPEPDAARSQGAVFYVLSMEQRPMATQMIAIASAWKEACTSENLSTVVISKGNYMVGSVTFKGPCKSPITLHIEGKLKAPVELERLSSQDGWIVFQDIDGLQVSGGGTFDGQGSAAWAKNDCRKTGKCSSLPINLRFSSVTNSKMQDVTSLNSKLFHINILNCKNLSLQHISINAPANSLNTAGIHIGRSNGVHITDADIKTGDDCVSLGDGSQQISIEKVTCGPGHGISVDTLGRYHDEQPVNGVTVRNCTLKNTMNGVRVKTWPDSPSGVASEMTFEDIIMDNVSNPILIDQKYCPYGECKAKILK*	2	23749778	23750980	-1	FGENESH	ATGAAAGTAGTGGGTGCATTGCTTTTGTGCTGGCTGACATTAGTCATAGAGTCACAAGGAGCAAATTTGGATTTCCAAAAACCTGAAGCACAGGCCTCAGAAGCAGAGGCCTCAAAAGATGCCGCGCGATCACAAGGTGCAGTTTTTTATGTTTTAAGTATGGAGCAAAGGCCGATGGCAACTCAGATGATAGCTATTGCAAGTGCCTGGAAAGAGGCATGCACATCTGAAAATCTGAGCACTGTTGTAATTTCGAAAGGAAACTACATGGTTGGTTCAGTAACGTTCAAAGGACCCTGCAAATCTCCTATAACTCTTCATATTGAAGGAAAACTGAAGGCCCCAGTAGAATTAGAAAGGCTCAGTTCACAGGACGGATGGATCGTTTTCCAGGACATT…	MKVVGALLLCWLTLVIESQGANLDFQKPEAQASEAEASKDAARSQGAVFYVLSMEQRPMATQMIAIASAWKEACTSENLSTVVISKGNYMVGSVTFKGPCKSPITLHIEGKLKAPVELERLSSQDGWIVFQDIDGLQVSGGGTFDGQGSAAWAKNDCRKTGKCSSLPINLRFSSVTNSKMQDVTSLNSKLFHINILNCKNLSLQHISINAPANSLNTAGIHIGRSNGVHITDADIKTGDDCVSLGDGSQQISIEKVTCGPGHGISVDTLGRYHDEQPVNGVTVRNCTLKNTMNGVRVKTWPDSPSGVASEMTFEDIIMDNVSNPILIDQKYCPYGECKAKILK*	2	23749778	23751029	-1	NO
CitPG6	Ciclev10020162m	ATGTTCCGTTTCCTCGTCACGCTTTCGATTCTCTTATCATATTTCAACTGCTTTTCCCTCGCGAGCGTGGTGACGTGCTCGGGGATTGTACCGATGAGGTACCGAAACGACAAGATATCGATCACCGATTTCGGTGGCGTCGGTGACGGAAAGACTTTGAACACGAAAGCGTTTCGTGAGGCAATCTACCGGATTCAGCATTTGAGAAGGAGTGGCGGCACGCTTCTTTATGTTCCTCCTGGGGTGTACTTAACGGGAAGCTTTAATCTTACCAGTCACATGACTCTTTATTTGGCTAAAGGTGCTGTTATCAAGGCCACTCAGGATACTTGGAATTGGCCTTTAATTGCCCCTTTGCCATCGTATGGAAGGGGAAGGGAGCGCCCTGGAGGAAGGTAT…	MFRFLVTLSILLSYFNCFSLASVVTCSGIVPMRYRNDKISITDFGGVGDGKTLNTKAFREAIYRIQHLRRSGGTLLYVPPGVYLTGSFNLTSHMTLYLAKGAVIKATQDTWNWPLIAPLPSYGRGRERPGGRYMSFIHGDGLQDVVITGENGTIDGQGAIWWNMWRQRTLPFTRPNLIEFMNSRSIIISNVIFQNSPFWNIHPVYCSNVVIRYVTILAPADSPNTDGIDPDSSSNVCIEDSYISTGDDLVAVKSGWDEYGIAYGHPSSGITIRRVTGSSPFSGIAVGSETSGGVENVLAEHINLYNVGVGIHVKTNIGRGGFIRNITVSDVYMENARKGIKIAGDVGDHPDDKFNPNALPVVNGITIKDVWGTKVQQSGLIQGLKNSPFTGICLSNINL…	3	1015286	1020829	1	aCL2029Contig1							Cs5g02370.1	99.5
CitPG7	Ciclev10019941m	ATGGAGTCGTTAAAAACTGCCAAAAGAACTCAGGTTATTTGTATCATATTGCTAGTTGGTATTATCATCTCGTTAAATACAAATGGAGTTGAGAGTAGAAAAGCCCGAAATTCAGACTGGTTTGAGTACTCAGCAATAAGTTGCAGAGCTCACAGCGCATCACTGGAGGAATTCGGAGGCGTTGGCGATGGAATCACATCAAACACAAAGGCTTTTAAGGCCGCAATTGATCATTTGAGTCGGTTCCAGTCAGAAGGAGGGTCCCAACTGTTTGTTCCTCCTGGAAAATGGCTGACTGGAAGCTTCAATCTCACCAGCCATTTCACTTTGTTTCTTCACAAGGATGCTGTTCTTCTTGCTTCCCAGGATGAGAAAGAATGGCCTGTGATCGAGCCTTTG…	MESLKTAKRTQVICIILLVGIIISLNTNGVESRKARNSDWFEYSAISCRAHSASLEEFGGVGDGITSNTKAFKAAIDHLSRFQSEGGSQLFVPPGKWLTGSFNLTSHFTLFLHKDAVLLASQDEKEWPVIEPLPSYGRGRDTEGGRYSSLIFGTNLTDVVITGDNGTIDGQGELWWRKFRAGELKYTRPYLIEIMYSQNIQISNLTLINSPSWNVHPVYSSSVIVQGITILAPVTSPNTDGINPDSCTNTRIEDCYIVSGDDCVAVKSGWDQYGIAYGMPTKQLIIRRLTCISPFSAVIALGSEMSGGIQDVRAEDITAIDSESGVRIKTAVGRGGFVKDVYVRRMTMKTMKWAFWITGSYGSHPDNNYDPHALPVIQNINYRDMVAENVTMAARLEGI…	3	1544509	1547621	-1	aKN0AAA3CH04ZM1_c|aC20006H12SK_c							Cs5g03170.1	99
CitPG8								FGENESH|ESTs Rangpur lime	ATGGCAATCAAGCTTATAATTTTTCTTCTCTTTGTCATAATCTTTATCAAATCATCAAATGCAGCTAATTACAATGTGATCACATATGGTGCAAAACCAGATGGAAGAACAGATTCAACTAAGGCATTTCTCAAAGCATGGGCTTCGGCGTGCCGATCGGCTAAGGCATCAACCATTTATGTCCCTAAAGGAAGGTACTTGATAAAAGCAGCTGAATTCAGAGGGCCTTGCAGAAATAGAGTCACACTTCAGATTGACGGAACAATTGTGGCTCCTACAAATTATTGGGCACTTGGAAATTCAGGATATTGGATTTTGTTCATCAAAATTGATAGACTCTCAGTCATCGGTGGAACTTTTGACGGAAAAGGCGCCGGCTTCTGGGCTTGCCGTAAATCT…	MAIKLIIFLLFVIIFIKSSNAANYNVITYGAKPDGRTDSTKAFLKAWASACRSAKASTIYVPKGRYLIKAAEFRGPCRNRVTLQIDGTIVAPTNYWALGNSGYWILFIKIDRLSVIGGTFDGKGAGFWACRKSGKNCPAGASSITFNWANNVLITGLTSINSQQTHLVINRCNNVNVRNVKVVAPDQSPNTDGIHVQASTGVTITSVTLKTGDDCISIGPGTRNLFMNNIKCGPGHGVSIGSLGKDFNEDGVQNITLLNAVFTGSDNGVRIKSWARPSNSFVRNVLFQNIIMNNVQNPIIVDQNYCPNNQGCPRQSSGVKISQVTYRNIKGTSKTPEAVTFDCSPTNPCRGIRLHDIKLTYMNRAATSSCKNIGGTTFGVVLPKSCL*	3	25674822	25676371	-1	orange1.1t02510.1	99
CitPG9								FGENESH	ATGGCGGCCAAGCTTCTCATTTCTTGTATTCTTTCTCTCTTCCTCACATTCTTTTTCAAACCATCAAATGCAGCATACAATGTGATAGATTTGGGTGCAAAATCAGATGGGGAAACAGATTCAACTCAAGCTTTTCTCAAGGCATGGGCCGCGGCGTGTAGCTCAGTGAAAGCATCAACAATTTATGTGCCAACAGGGAGATACTTGATAAAGAATATAGTTTTTAGAGGGCCATGCAAGAATAAAATTGCAATTCAGATAAAGGGAACAATTGTGGCTCCTACAGATTATCATGTAATTGGGAAAACAGGGAATTGGATTTTGTTTGTTCAGGTTGATAGAGTTTCAGTCATTGGTGGCACTCTTGATGCTCAGGGTGCTGGTTTTTGGGCATGCAGA…	MAAKLLISCILSLFLTFFFKPSNAAYNVIDLGAKSDGETDSTQAFLKAWAAACSSVKASTIYVPTGRYLIKNIVFRGPCKNKIAIQIKGTIVAPTDYHVIGKTGNWILFVQVDRVSVIGGTLDAQGAGFWACRKSGQNCPVGSRSITFDWASNVMISGLTSINSQLIHLAINSCKNVIVRNVKLIAPDESPNTDGIHIQSSTGVTITGSIMQTGDDCISIGPGTRNLYMSSIKCGHGHGVSIGSLGWGVNEDGVENVTLTNSRFTGSDNGVRIKSWARPSNSFVRNVLFQNIIMKNVQNPILIDQNYCPHNQCPHQASGVKISQVTYRNIQGTSATAEAVTFDCSPGNPCRGIILQDIKLTYMNKAAATSSCKNIGGMSSGVLMPESCLHGG*	3	25679892	25682009	-1	orange1.1t02511.1	99.5
CitPG10								FGENESH	ATGGCAGCAGCCAAGCTTATTACAATTTCTTGTGTTGTTTCTGTCTTTCTCATCTTTTTCATCAAATCATCAAATGCAGCTAGTTACAACGTGATAACTTTTGGTGCCAAACCAGATGGGAGAACAGATTCAACACAATCTTTTCTTAGGGCATGGGCAGTGGCGTGTAGGTCAGCTCAGGCTTCCACTATTGTTGTTCCAATGGGAAGGTACTTGATAAAGAATGCAGTTTTTAGAGGGCCATGCAAGAGCAGGATTACAGTTCAGATATCGGGAACGATTGTGGCTCCTAATGATTATCGTGCACTTGGAAAATCGGATCGTTGGATTCTGTTCATTAAGGTCGATAGACTTTCAATAATTGGTGGCACTCTTGATGGTAAAGGTGCTGGCTTCTGG…	MAAAKLITISCVVSVFLIFFIKSSNAASYNVITFGAKPDGRTDSTQSFLRAWAVACRSAQASTIVVPMGRYLIKNAVFRGPCKSRITVQISGTIVAPNDYRALGKSDRWILFIKVDRLSIIGGTLDGKGAGFWACRKSGRNCPVGTRSITINSANNVIVSGLTSINSQLSHLVISSCNNVIVRNVKFIAPAESPNTDGIHVESSTGVTITGGTIQTGDDCISVGRGTRNLHMSNIKCGPGHGVSIGSLGKELNEDGVENVTLTNSVFTGSDNGVRIKSWARPSRSFVRNVFFQNIIMRNVKNPILIDQNYCPNNQGCPNKNSGVKISQVTYRNIQGTSATPKAVAFDCSPSNPCRGIKLQDIKLTYMNKAATSSCKNIGGTTSGVIMPRSCL*	3	25710690	25712843	-1	orange1.1t02512.1	99
CitPG11								FGENESH	ATGGCCAAGCTAGCAGTTTCATGCATACTCTTCATCTTCTTCATTAATACCCTCTTCCAATCAGGAAGTGCAGCCTATAATGTGATCAATTTTGGTGCAAAACCAGACGGAAAATCTGACGCCACACAGGCGTTCCTTCGGTCGTGGTCATCGGCATGCTACTCCAATAGTCCGGCCACGCTGCATGTTCCTCGGGGACTTTTCTTGGTAAAATCGATATCCTTTAATGGACCATGTAGGCACAGGATTGTGTTTCAGATTGATGGAACAATTATCGCTCCATCAAGTTATTGGTCTCTAGGCAATTCGGGATTTTGGATTTTGTTTTACAAGGTCAATAGATTGAGTATACATGGAGGAACCATTGATGCAACAGGAGCTGGCTATTGGGCTTGCAGG…	MAKLAVSCILFIFFINTLFQSGSAAYNVINFGAKPDGKSDATQAFLRSWSSACYSNSPATLHVPRGLFLVKSISFNGPCRHRIVFQIDGTIIAPSSYWSLGNSGFWILFYKVNRLSIHGGTIDATGAGYWACRKSGKSCPPPTRSISFVGASNIVVSGLTSINSRFFHIAIDECVNIMLRKLKINAPSWSPNTDGIHIQSSSGITISNSAITTGDDCISVGPGTKNLWVERIACGPGHGISIGSLGAYAAEDGVKNVTVTDSIFTGTQNGVRIKTWARPSNGFARNIRFRNIIMTKVFNPIIIDQNYCPDNHCPHQSSGVTISGVTYRNIKGTSATPVAVNFGCSSSKPCTGIKLQGIRLTYFNKAATAYCKNARGSSSGVVVPGSCLG*	3	25752243	25754056	-1	orange1.1t02516.1	95.4
CitPG12	Ciclev10023493m	ATGCCTTCTTCTAGGGTTTTATTATTTCTCATGTTCTTAGGCTTTGCAGTGGTTACAAAAGTTCAAGGTGGAATCAAGATTTTTGATGTAACAAAATATGGTGCAATTGGAGATGGCCGCATTGATAATACCAAGGCATTTTTGAGAGCATGGAATGATGCATGTAAGTGGGATGGAAACAGTGGGGTTTTGATCCCAAGAGGAACATTTTTGTTGGGCACAGTCACATTTACAGGACCATGCAAGAAATCAACGGCATTCCAAATCAAAGGGGTTATCAGGGCTCCTAGTGATCTCAAAAGAATGAGTAATCCTGATCAATGGATCGGCTTCCGATACGTCGATCGGCTGCTGGTGAATGGCCGTGGCACCGTAGACGGCCAAGGAGCCTCCGCTTGG…	MPSSRVLLFLMFLGFAVVTKVQGGIKIFDVTKYGAIGDGRIDNTKAFLRAWNDACKWDGNSGVLIPRGTFLLGTVTFTGPCKKSTAFQIKGVIRAPSDLKRMSNPDQWIGFRYVDRLLVNGRGTVDGQGASAWSFNSCAEDPNCPSLPISMVFNFVTNSRISGITSVNSKNAHISLYGCHKVSIDNIKITAPYQSPNTDGIKIGDSKGIKITHSSIGTGDDCIALLSGSTNINVTDVSCGPGHGISVGSLGRYANERNVHGLAVRNCTFRGTTNGVRIKTWASPQANVASGFTFENIFMSNVENPIVIDQMYCPHGSCNQKITSNVQIKDVTYRNIWGTSSTKVAVNFQCSKTFPCENIVLQDIYLVHNGRDGAATSSCNFVDGDSYGNQKPPSCL*	3	29404073	29405738	-1								Cs5g14410.1	99.2
CitPG13	Ciclev10023712m	ATGGCAAGACAAGAGAGATTTGTTGTCAAGGCTGTTCTTCTCCTAGGATTAACTTTTCTCTCTTCTGTGGTGCAAGGGGCAGAACCCAACTATAGCTTATATTTTGATGTTACAAAATTTGGTGCTGAGGCAAATGGCGACAAAAATAATGCACAGGCATTTACTGAGACTTGGGCAAAGGCATGCGGATCTGGTGCTCCAGCAAAGGTTCTTATACCCTCAGGAACATTTCTGACAGGGCCAGTAGTTTTTTCAGGGCCATGCAAAAGCGCTATAACTGTTGAAGTTCGGGGCATTGTAAAAGCCACAACTGACCTCAAGGAATACGCTGATGGAGACTGGATCCTGTTTGAAAACATAGATGGTTTGCTTCTCACTGGTGGAGGTACTTTTGATGGC…	MARQERFVVKAVLLLGLTFLSSVVQGAEPNYSLYFDVTKFGAEANGDKNNAQAFTETWAKACGSGAPAKVLIPSGTFLTGPVVFSGPCKSAITVEVRGIVKATTDLKEYADGDWILFENIDGLLLTGGGTFDGQGAASWKLKDSNPQHSATKCDLLPISIKFNHVNNSVVTGINSLNSKGFHILLVFCQNFTASNLNITAPDESPNTDGIHLSLSSFVNITNSKIGTGDDCVSIGHGSTDISVSRITCGPGHGISVGSLGNKPDEMDVNGITVFNCTLINTTNGLRIKTKRGSASLKASRIFYDNIIMDKVKNPIIIDQNYGAKKNEPSRVKITDVHYKNIKGTSITNVGVNLNCSSVVPCDGVELVGVDLAFDVGSAKKAEANLPFSSSCANAEAKFE…	3	46025851	46027669	1								Cs5g33480.1	99.8
CitPG14	Ciclev10024556m	ATGCAGTCTCTGCTCCGCCCTTTAATTCATTGCATAGAGAACATTGAGAGACTCAAAATGGCTTATTCTAGGAGGGTATCAATACTTATATTTTGTATTTGTTTTCTTGGCTTCATCCTTTCTGTCCAAGCTAGAAGGCATCACTCTATAAAACACAAACACACCCACCACCACAATACATATGAATTCTCAGAAACTCCTTCTCCTTCTCCTTCACCTCAGCTCACCGATCCATCTAATAACACTAATGCCCATAATTCCGCTAATTCTCCTTCTCCCTCGCCAGAGGCCGATAGTCCATCGGATGATTGGAATGCTGATAATTCTACGGCTGCTTCTTCCCCATCACCTGAGCCTTCTAATCCACCTAGTGGCTACAATGCTATGCGTGCTCCTTCT…	MQSLLRPLIHCIENIERLKMAYSRRVSILIFCICFLGFILSVQARRHHSIKHKHTHHHNTYEFSETPSPSPSPQLTDPSNNTNAHNSANSPSPSPEADSPSDDWNADNSTAASSPSPEPSNPPSGYNAMRAPSPSTEPANPPNKGNGYDSPGAPSASHAPTNPLNGYNFTRTPSPSSGPAAPPNKGNDYNSPGAPTTSPANSPDDGNVIDVRKFGAVGDGISDDTEAFKMTWDSACQKDFAVIHVPYGFSFMIQSTIFTGPCQGSIVFQVDGTIMPPDGPESWLQKNSKRQWLVFYKINELSLQGGGTIDGRGHKWWDLPCKPHKGINGTTSPGPCDSPIALRFFMSSNLTVQRLRIKDSPQFHFRFDNCKNVHIESIHITAPALSPNTDGIHIENTNG…	3	46855733	46859065	-1	aC08004G09SK_c							orange1.1t01738.1	69.7
CitPG15	Ciclev10020035m	ATGAGGAGATCTTTTACTCTGGTGGATGTGTTTCTGGTACTTGCATTATTTAGTGAAGCTCCATGGGCTGTCGCGGGCAGCTCACAATGTAGTCAAAGCAATTTAGAGGTATTTCGGCCTCATAGTGTCTCTATCACTGAATTTGGAGCTGTCGGAGATGGTGTCACTCTAAACACCAAAGCCTTTCAGAATGCAATCTTCTATCTCAATTCATTTGCAGACAAGGGTGGGGCCAAGCTTTTTGTCCCAGCTGGCCAGTGGTTGACAGGTAGCTTCGATCTCATCAGTCATCTAACTTTGTGGTTAGACAAGGATGCAGTAATTCTTGGATCCACGAACTCGGACACTTGGCCGGTTATTGATCCTCTACCATCATATGGCAGAGGTAGGGAGTTGCCT…	MRRSFTLVDVFLVLALFSEAPWAVAGSSQCSQSNLEVFRPHSVSITEFGAVGDGVTLNTKAFQNAIFYLNSFADKGGAKLFVPAGQWLTGSFDLISHLTLWLDKDAVILGSTNSDTWPVIDPLPSYGRGRELPGGRHRSLIFGRNLTDVVITGDNGTIDGQGSIWWEWFRNGTLDYTRPHLVELMNSTGVIISNLTFLNPPFWTIHPVYCSHVKVQNVTIRAPLDSPNTDGIDPDSSDDVCIKDCYISTGDDLVSIKSGWDEYGISYGRPSTKITIHGLIGETKLGAGIAIGSEMSGGVSEVHAENLYFFNSVRGIRIKTSPGRGGYVRNISISNVTLNHVDVAIIFTGHFGEHPDDSYDPSALPIIERITIKNVIGENVKMAGQLEGIEGDTFRYICL…	3	47112186	47115673	1	aIC0AAA15BF03RM1_c							orange1.1t01777.1	100
CitPG16	Ciclev10019597m	ATGGCAGCGGTAGCAGATCAAGATATGATGAGAATTGAATCATTGATATTTGATAAAAAGGCTCACGGGAGGCCCCACCAGTATTATCAAAATCAAACCCGTGAAGAGAATAGTCGAAGTGGGTCGGCAAAGGCAATAGTGGGCAACACCACAAAACAACATTCTAAGATCACCTACCTTATCACAACAATGGAGCTGTCGCGGATGAGCCGCCTGAGAAGTCAAGTGACTAAGTTAGTGCCACTTCTCATAGTGGTGGCATTACTGAGCCAAAGAGGAGCTGAGAGCAGAAAGGCAAGGAGACTAGACTCATTTGAGTACAATGCTATAAGCTGTAGAGCACACAGTGCATCAATTACTGATTTTGGAGGAGTTGGTGATGGCAAGACATCGAATACA…	MAAVADQDMMRIESLIFDKKAHGRPHQYYQNQTREENSRSGSAKAIVGNTTKQHSKITYLITTMELSRMSRLRSQVTKLVPLLIVVALLSQRGAESRKARRLDSFEYNAISCRAHSASITDFGGVGDGKTSNTKAFKDAINQLSQYSSDGGAQLYVPAGKWLTGSFNLISHFTLYLHKDAFLLASQDLNEWPVIKPLPSYGRGRDAAAGRYTSLIFGTNLTDVIVTGDNGTIDGQGALWWQQFHKGKLKYTRPYLIEFMYTDNIQISSLTLLNSPSWNVHPVYSSNILVQGITIIAPVTSPNTDGINPDSCTNTRIEDCYIVSGDDCVAVKSGWDEYGIAYGMPTKQLVIRRLTCISPYSATIALGSEMSGGIQDVRAEDIKAINTESGVRIKTAVGRG…	3	48762460	48765718	-1	aCL5261Contig1	ATGGAGCTGTCGCGGATGAGCCGCCTGAGAAGTCAAGTGACTAAGTTAGTGCCACTTCTCATAGTGGTGGCATTACTGAGCCAAAGAGGAGCTGAGAGCAGAAAGGCAAGGAGACTAGACTCATTTGAGTACAATGCTATAAGCTGTAGAGCACACAGTGCATCAATTACTGATTTTGGAGGAGTTGGTGATGGCAAGACATCGAATACAAAGGCTTTCAAGGACGCTATCAATCAACTGAGTCAGTACTCTTCTGATGGTGGAGCTCAGCTGTATGTTCCTGCTGGGAAATGGCTCACCGGTAGCTTTAACCTCATCAGTCACTTCACTCTTTATCTCCACAAAGATGCTTTTCTTCTAGCTTCTCAGGATTTGAACGAATGGCCCGTGATCAAGCCT…	MELSRMSRLRSQVTKLVPLLIVVALLSQRGAESRKARRLDSFEYNAISCRAHSASITDFGGVGDGKTSNTKAFKDAINQLSQYSSDGGAQLYVPAGKWLTGSFNLISHFTLYLHKDAFLLASQDLNEWPVIKPLPSYGRGRDAAAGRYTSLIFGTNLTDVIVTGDNGTIDGQGALWWQQFHKGKLKYTRPYLIEFMYTDNIQISSLTLLNSPSWNVHPVYSSNILVQGITIIAPVTSPNTDGINPDSCTNTRIEDCYIVSGDDCVAVKSGWDEYGIAYGMPTKQLVIRRLTCISPYSATIALGSEMSGGIQDVRAEDIKAINTESGVRIKTAVGRGGYVKDIYVRGMTMHTMKWAFWMTGNYGSHADNHYDPKALPVIQGINYRDIVADNVSMAARLEG…	3	48762460	48765529	-1	orange1.1t00402.1	100
CitPG17	Ciclev10033716m	ATGAGGAGAAACGATAAATCATCTCTTCTATTTGTTCTGATTTTTCTGCTGATTGTGTCGGTCACATTTTCCATAATGTCAGTCGAGGCAAGAAAGCATCACACCAAGAAAAGCAAGCCCCGCCCTCACAAGCATCAGAAAGATAAGCATGGCCCTGAGCCTGATTCAAGATTTCCATCACCCGCACCAGCACCTCTTCCTCATTATGGTTCTTATAACCGGACGAAGTCGAGTATTTTCGATGTTTTGTCATTTGGAGCTAAGGGAGATGGAGTTTCTGATGATACAAAGGCACTAATAGCAGCATGGAAAGCTGCATGCAGGGTGGCTGGGGCTACAGTGGAAATTCCGTCAGAGTTCAAGTTCCTTATCAAGCCCATAACTCTTCAAGGTCCATGC…	MRRNDKSSLLFVLIFLLIVSVTFSIMSVEARKHHTKKSKPRPHKHQKDKHGPEPDSRFPSPAPAPLPHYGSYNRTKSSIFDVLSFGAKGDGVSDDTKALIAAWKAACRVAGATVEIPSEFKFLIKPITLQGPCMPNLVLQIDGTLLAPPKVGSWPKSSLFQWINFKWLHNFTIQGNGIVDGQGFEWWGGSESNSIQLYVVTSHWQKKSKHIPEMKPTALRFYASYNVTVRDIKINNSPLCHLKFDSSGGIKVKNIHISSPENSPNTDGIHLQNTKDVEIQHSDIACGDDCVSIQTGCSNVHIHHINCGPGHGISLGGLGKDKSVACVSDIVVEKISLQNTLAGVRIKTWQGGIGSVKNVSFSSIQVSDVKVPIIIDQYYCDKHLCNNQTGAVAISGVEF…	4	22430710	22433428	-1	aKN0AAL2CE12FM1_c	ATGAGGAGAAACGATAAATCATCTCTTCTATTTGTTCTGATTTTTCTGCTGATTGTGTCGGTCACATTTTCCATAATGTCAGTCGAGGCAAGAAAGCATCACACCAAGAAAAGCAAGCCCCGCCCTCACAAGCATCAGAAAGATAAGCATGGCCCTGAGCCTGATTCAAGATTTCCATCACCCGCACCAGCACCTCTTCCTCATTATGGTTCTTATAACCGGACGAAGTCGAGTATTTTCGATGTTTTGTCATTTGGAGCTAAGGGAGATGGAGTTTCTGATGATACAAAGGCACTAATAGCAGCATGGAAAGCTGCATGCAGGGTGGCTGGGGCTACAGTGGAAATTCCGTCAGAGTTCAAGTTCCTTATCAAGCCCATAACTCTTCAAGGTCCATGC…	MRRNDKSSLLFVLIFLLIVSVTFSIMSVEARKHHTKKSKPRPHKHQKDKHGPEPDSRFPSPAPAPLPHYGSYNRTKSSIFDVLSFGAKGDGVSDDTKALIAAWKAACRVAGATVEIPSEFKFLIKPITLQGPCMPNLVLQIDGTLLAPPKVGSWPKSSLFQWINFKWLHNFTIQGNGIVDGQGFEWWGGSESNSIQKKSKHIPEMKPTALRFYASYNVTVRDIKINNSPLCHLKFDSSGGIKVKNIHISSPENSPNTDGIHLQNTKDVEIQHSDIACGDDCVSIQTGCSNVHIHHINCGPGHGISLGGLGKDKSVACVSDIVVEKISLQNTLAGVRIKTWQGGIGSVKNVSFSSIQVSDVKVPIIIDQYYCDKHLCNNQTGAVAISGVEFNQIIGTYSV…	4	22430710	22433428	-1	Cs7g09030.1	99.8
CitPG18								FGENESH|aC05044B02SK_c	ATGGATAAATTCTTGATTATTTCATTCTTCGGTGTGCTGATGGTGGCTCATGCAGTTGCAGGAAAAATGGTACATGACAATATTGCCTTACTTGGGGAGCTTGAAAACCTGGACGTAGAAGAAGAGAATGAGGTGGAACTTTTTGAAGAGCCATCATGGACAAGTGAACGAGGTGGCAAGGTTCTAGTAAATGTGGATAGCTTTGGAGCCGCTGGAGATGGAGTTTCTGATGATACCCAGGCTTTCCTGAATGCATGGAACACAGCCTGCTCTACTCCAAAATCAGTTTTCTTGGTTCCTGCAGGACGCCATTATTTAGTTAGTGCAACAAGATTCAAGGGGCCATGTGCTGACAAGTTAGTCATTCAGATTGATGGAACAATAGTTGCACCAGCTGAA…	MDKFLIISFFGVLMVAHAVAGKMVHDNIALLGELENLDVEEENEVELFEEPSWTSERGGKVLVNVDSFGAAGDGVSDDTQAFLNAWNTACSTPKSVFLVPAGRHYLVSATRFKGPCADKLVIQIDGTIVAPAEPDNWDPKLARIWLDFSKLNGVLFQGSGVIDGSGSKWWASSCKKNKSNPCRGAPTALTIDSSSAVKVKGLTIQNSQQMNFVISRSESVRVYQVLVSAPEDSPNTDGIHITESTNVVLQDCKIGTGDDCISIVNGSSAIKMKRIFCGPGHGISLATLGETLGKGGSGYVRGVRFENVRMEDVSNPIIIDQFYCDSPKACQNQTSAVKISQIMYRNISGTTKSSKAMKFACSDTVPCSDIVLSNVNLEKKDGTVETYCNSAQGIGYGIV…	4	22567536	22570518	1	Cs7g08830.1	93.3
CitPG19	Ciclev10031220m	ATGAGAGGGTTGAGTTTCAGAAGCCTAGCATTCTTATTCTTGATTGCATTTCTTGTCTGGTCTGCAAGTTTTGAGACCTGCAATGCAAGAAGAGGGAGGCATTGGAGGCACGGCAGAAGCAGCAACTCTGTTTCTTTGTCCAAGAAGAATAATAAAGGAAATATCCATCGAAAAGGCGGTCACCACAATTATCACAATGGCAAACCAAAACCAAAACCGAAGCCCAAACCAAAGGCGCCGTCTCATAACAAGTCTCCTCCTTTGGCTCCGGCGGTGCCTACTAAGCCTGTATACGATGTTCCACCACCGAGCCACCATTCCTCTGTCTTTAACGTGAAGGATTTTGGCGCTAAGGGTAATGGAGTTAGTGATGACACTAAGGCATTTGAAGCTGCGTGG…	MRGLSFRSLAFLFLIAFLVWSASFETCNARRGRHWRHGRSSNSVSLSKKNNKGNIHRKGGHHNYHNGKPKPKPKPKPKAPSHNKSPPLAPAVPTKPVYDVPPPSHHSSVFNVKDFGAKGNGVSDDTKAFEAAWAAACKVEASIMVVPAESVFLVGPMSFSGPYCQANIIFQLDGTIIAPTGSKDWGKGLLWWLDFTKLKGITIQGKGIIDGRGSVWWQDYPYDDPIDDESKLIIPLHNNTLPDKPPTPIRSELSGKMPSIKPTALRFYGSFNVTVTGITIQNSPQCHLKFDNCIGVVVHDVSVSSPGDSPNTDGIHLQNSKDVLIHTSNLACGDDCVSIQTGCSNVYVHNVNCGPGHGISIGSLGKENTKACVSNITVRDVMMHNTMNGVRIKTWQGGS…	4	22577317	22582276	1	aCL8550Contig1							Cs7g08820.1	99.4
CitPG20	Ciclev10033386m	TTTAGCAGCTATCAAGGTGACCGATTTGTCACAACTCGTGATCAATACCAGAGATTTGGGAGCCCAATCGGGGTCGATTCGGAGTCTGAAACGACTTTGACGAGGCTGTACGGTCGTGCAAGTGCTCCTGCTTCTCCAACAAAGTTTGTGAATGTGGACGATTTTGAAGCGAAAGCTGATGGAACTGATGACTCTAAGGCATTTATGGAAGCTTGGGAGGAGGCTTGTTCTTCTGAAAATGAAGCTGTTTTAGTCGTCCCCAACAACAAAATCTATCATCTTAAGCCAATTACATTCTCAGGTCCCTGCAAATCTGATCTTACAATGAAGATTTATGGAACAATCAAAGCATCTGTTCGTTTATCAGACTACAGCAGAGATCCAAGGCATTGGCTTGTG…	FSSYQGDRFVTTRDQYQRFGSPIGVDSESETTLTRLYGRASAPASPTKFVNVDDFEAKADGTDDSKAFMEAWEEACSSENEAVLVVPNNKIYHLKPITFSGPCKSDLTMKIYGTIKASVRLSDYSRDPRHWLVFENVNNFRVEGGGTIDGNGKVWWRKSCKVNKSLPCNDAPTAVTFYGCKNVRVSSLRFRNSQKMHLTFQYCVNVRALNLLVIAPGNSPNTDGIHVTGTQNILIKNCVIRTGDDCISIVSGSKNVRATDIICGPGHGISIGSLGAGNSEAFVSNVLVNRARLSGTTNGVRIKTWQGGSGFAKDILFQNVEMRNVTNPIIIDQHYCDQEKPCQEQASAVQVSNVVYQNIKGTSASEVAIKLDCSNQFPCRGLVLQDVILRLEEEDDIAK…	4	25493771	25496117	-1	FGENESH|ESTs citrumelo	ATGCACCCACAAAGGCAATATTGGTTACCTATATTCTTGGCTATGTTAGTCTCTTTTTTCTCCTTCAGTTTTAGCAGCTATCAAGGTGACCGATTTGTCACAACTCGTGATCAATACCAGAGATTTGGGAGCCCAATCGGGGTCGATTCGGAGTCTGAAACGACTTTGACGAGGCTGTACGGTCGTGCAAGTGCTCCTGCTTCTCCAACAAAGTTTGTGAATGTGGACGATTTTGAAGCGAAAGCTGATGGAACTGATGACTCTAAGGCATTTATGGAAGCTTGGGAGGAGGCTTGTTCTTCTGAAAATGAAGCTGTTTTAGTCGTCCCCAACAACAAAATCTATCATCTTAAGCCAATTACATTCTCAGGTCCCTGCAAATCTGATCTTACAATGAAG…	MHPQRQYWLPIFLAMLVSFFSFSFSSYQGDRFVTTRDQYQRFGSPIGVDSESETTLTRLYGRASAPASPTKFVNVDDFEAKADGTDDSKAFMEAWEEACSSENEAVLVVPNNKIYHLKPITFSGPCKSDLTMKIYGTIKASVRLSDYSRDPRHWLVFENVNNFRVEGGGTIDGNGKVWWRKSCKVNKSLPCNDAPTAVTFYGCKNVRVSSLRFRNSQKMHLTFQYCVNVRALNLLVIAPGNSPNTDGIHVTGTQNILIKNCVIRTGDDCISIVSGSKNVRATDIICGPGHGISIGSLGAGNSEAFVSNVLVNRARLSGTTNGVRIKTWQGGSGFAKDILFQNVEMRNVTNPIIIDQHYCDQEKPCQEQASAVQVSNVVYQNIKGTSASEVAIKLDCSNQ…	3	25493771	25496186	-1	Cs7g01690.1	100
CitPG21	Ciclev10003286m	ATGCAAAAAGAAAAGGCAATGAAATCAGAAAAGCTGAAGGGGAATTTCAGCCGGCCATCATGGGCGACACTTGTGCTAATCGTCACTCTCATAACAATCCTCTCCTTACAAATCACAAAGAAGTCCGTTTTGTCGCCCAAACGGGTCGGTTTCTCGGGAGCCGATGGAGCGATATTCGACCCGGACTCGTGTGCCGCCGGGTTGCTGGGGGATCAGTACTTGCCGGAGAGAAAAGTCGTGATGTCGATAAAGGATTTCGGAGGAGTTGGAGACGGGACGACGTCGAATACAGAAGCGTTCCGGAAAGCGGTTCGGTACATGCAAGGCTTCGGCGACAAAGGTGGGGCCCAGTTGAACGTTCCGGAAGGCTTGTGGCTCACCGGAAGCTTCAATCTCACC…	MQKEKAMKSEKLKGNFSRPSWATLVLIVTLITILSLQITKKSVLSPKRVGFSGADGAIFDPDSCAAGLLGDQYLPERKVVMSIKDFGGVGDGTTSNTEAFRKAVRYMQGFGDKGGAQLNVPEGLWLTGSFNLTSNFTLFLEKGAVILGSQDMDEWPIIDPLPSYGRGRERLGGRHISLIHGDHLTNVIITGYNGTIDGQGQMWWDLWWNRTLKHTRGHLVELMNSNNILISNLTFRNSPFWTIHPVYCRNVVIKGMTILAPLNAPNTDGIDPDSSTNVCIEDCYIESGDDLVAVKSGWDHYGIAMARPSSNIVVRRVSGTTPTCSGVGIGSEMSGGIFNVTVDQLHVWDAAAGVRIKTDKGRGGYIENITIRNIKMERVKIPIRISRGSNDHPDEGWDP…	5	17805801	17809117	1	aCL4239Contig1	ATGCAAAAAGAAAAGGCAATGAAATCAGAAAAGCTGAAGGGGAATTTCAGCCGGCCATCATGGGCGACACTTGTGCTAATCGTCACTCTCATAACAATCCTCTCCTTACAAATCACAAAGAAGTCCGTTTTGTCGCCCAAACGGGTCGGTTTCTCGGGAGCCGATGGAGCGATATTCGACCCGGACTCGTGTGCCGCCGGGTTGCTGGGGGATCAGTACTTGCCGGAGAGAAAAGTCGTGATGTCGATAAAGGATTTCGGAGGAGTTGGAGACGGGACGACGTCGAATACAGAAGCGTTCCGGAAAGCGGTTCGGTACATGCAAGGCTTCGGCGACAAAGGTGGGGCCCAGTTGAACGTTCCGGAAGGCTTGTGGCTCACCGGAAGCTTCAATCTCACC…	MQKEKAMKSEKLKGNFSRPSWATLVLIVTLITILSLQITKKSVLSPKRVGFSGADGAIFDPDSCAAGLLGDQYLPERKVVMSIKDFGGVGDGTTSNTEAFRKAVRYMQGFGDKGGAQLNVPEGLWLTGSFNLTSNFTLFLEKGAVILGSQDMDEWPIIDPLPSYGRGRERLGGRHISLIHGDHLTNVIITGYNGTIDGQGQMWWDLWWNRTLKHTRGHLVELMNSNNILISNLTFRNSPFWTIHPVYCRNVVIKGMTILAPLNAPNTDGIDPDSSTNVCIEDCYIESGDDLVAVKSGWDHYGIAMARPSSNIVVRRVSGTTPTCSGVGIGSEMSGGIFNVTVDQLHVWDAAAGVRIKTDKGRGGYIENITIRNIKMERVKIPIRISRGSNDHPDEGWDP…	5	17805801	17809155	1	Cs1g09130.1	100
CitPG22								FGENESH	ATGGCGAATTATGTAGCCGTTCTCTTCCTCCTTCTGAGTACTCAATGTTTTCTTTCAGCTCATTGTCGTCACCTCCCGTCGAATCAGGGAGCCATTGGCGATGTTTTCGACGTTCTTAATTATGGAGCTGCTGGCGACGGGCACACTGATGATACTCAGGCATTTAAGGATGCATGGAAAGCTACGTGTAAATCTTCATCAAGCTCACCAACCATGCATGTTCCCCATGACAAGTCTTTTAAGCTGCAACCCTTAACCTTCTCTGGCGAAATTTGCAAATCCAACAGCATCACTTTCCAGATTGATGGTCATTTAGTTGCACCCAGGGATCCTCACGCATGGAACACGTGTGATGGAAGCAAGTGTCGTCAATGGATTCAATTCAAAAAATTTGGTGGC…	MANYVAVLFLLLSTQCFLSAHCRHLPSNQGAIGDVFDVLNYGAAGDGHTDDTQAFKDAWKATCKSSSSSPTMHVPHDKSFKLQPLTFSGEICKSNSITFQIDGHLVAPRDPHAWNTCDGSKCRQWIQFKKFGGLFIRGVGSINGQGSNWWKLSCKHDKIVCGKKPTGLVVANSNNVHIDDLTFEDSPQMHIAFERSTNIEATNLTIMAPGNSPNTDGIHIQHSSNVSIAHSIISTGDDCVSIGDGSSHLNITNIFCGPGHGISIGSLGMKGRNEKVEFVHVNNVSFTETQNGVRIKTWQGGKGYARHIVFENIIFQGSYNPIVIDQYYCPHKHCKNKTLAVKISDVTYNHILGTSNGETAVAFSCSTSTPCKNIIMKDIHLGHVKPEKKTSSYCSNVRG…	6	24500747	24503105	1	Cs6g20600.1	97.8
CitPG23	Ciclev10027523m	ATGAAGCAACTTAAGTTTTCAAGCTTGGTTTCTACAGAAGGCTTTGACTCGTTGTTGGAGCTCCCACATTCTGGGTCAAACGGAACTCGATCCAAATCCAAAAGGGTAATTTTTGTTGGTGATTTTGGTGCCAAAGGAGATGGCTTCAATGATGACACTGAGGCATTTGCAAATGCTTGGAAGAAGGCTTGTTCTTTTCCTGCACGAACAAAAATTGTTTTTTCAGCTGGATACACTTTTCTAATCCATCCCATCGATATTTCTGGGCCCTGTAAATCTAGACTTACTTTGGAGATATCTGGAACAATAGTTGCTCCTAAAGATCCTGATGTCTGGAAGGGTTTGAATCGACGTAGATGGCTCTACTTTAATCGGGTGAACCATCTTACCGTACAAGGA…	MKQLKFSSLVSTEGFDSLLELPHSGSNGTRSKSKRVIFVGDFGAKGDGFNDDTEAFANAWKKACSFPARTKIVFSAGYTFLIHPIDISGPCKSRLTLEISGTIVAPKDPDVWKGLNRRRWLYFNRVNHLTVQGGGTIDGMGQEWWSRSCKINTTNPCRHAPTAITFHKCKNLKVQNLRVVNSQQMHIAFTNCLRVVISNLEVIAPAESPNTDGIHISASRGVEVKNSIVGTGDDCISIVGNSSLIRIRNFACGPGHGISIGSLGKSNSSVRIHDIMVYGALISNTQNGVRIKTWQGGSGSATNIQFLDVLMKNVSNPIIIDQYYCDSPVPCANQTSAVKVENITFIHIKGTSATEEAIKFACSDDSPCEGLFLEDVQLVSHSGGIAKSFCWEAYGSSVG…	7	11093533	11097571	1	ESTs / CsPG	ATGAAGCAACTTAAGTTTTGTTCGTTTTCAACATTTTTTATAGTTCTAATCCATGTGCTTGTTTGTCTGTCAGCAAGCTTGGTTTCTACAGAAGGCTTTGACTCGTTGTTGGAGCTCCCACATTCTGGGTCAAACGGAACTCGATCCAAATCCAAAAGGGTAATTTTTGTTGGTGATTTTGGTGCCAAAGGAGATGGCTTCAATGATGACACTGAGGCATTTGCAAATGCTTGGAAGAAGGCTTGTTCTTTTCCTGCACGAACAAAAATTGTTTTTTCAGCTGGATACACTTTTCTAATCCATCCCATCGATATTTCTGGGCCCTGTAAATCTAGACTTACTTTGGAGATATCTGGAACAATAGTTGCTCCTAAAGATCCTGATGTCTGGAAGGGTTTG…	MKQLKFCSFSTFFIVLIHVLVCLSASLVSTEGFDSLLELPHSGSNGTRSKSKRVIFVGDFGAKGDGFNDDTEAFANAWKKACSFPARTKIVFSAGYTFLIHPIDISGPCKSRLTLEISGTIVAPKDPDVWKGLNRRRWLYFNRVNHLTVQGGGTIDGMGQEWWSRSCKINTTNPCRHAPTAITFHKCKNLKVQNLRVVNSQQMHIAFTNCLRVVISNLEVIAPAESPNTDGIHISASRGVEVKNSIVGTGDDCISIVGNSSLIRIRNFACGPGHGISIGSLGKSNSSVRIHDIMVYGALISNTQNGVRIKTWQGGSGSATNIQFLDVLMKNVSNPIIIDQYYCDSPVPCANQTSAVKVENITFIHIKGTSATEEAIKFACSDDSPCEGLFLEDVQLVSH…	7	11093533	11097571	1	Cs1g12840.1	99.8
CitPG24	Ciclev10027366m	ATGACTTGGTATTCTGAGTTGGCCGTATTTGGAAATTGCCAAACTGGCGTGGATTTAGTTGCTAGTATATGTATTTTGATCCTGTTATCTACACTTGCAACTCACATTAATGTGAATGCCGATGATCAGAATACATTTAACGTTCTAAATTATGGAGCAGTTGGCAATGGAAACTCAGATGATTCCTTAGCATATGCAAAGGCATGGAATGATGCATGTAAGGCGAATGCACAAACACCCACTATGATTATTCCAAAGGGAAAGACATTTTTGGTGCATCCCATAACATTTTCTGGACCTTGCAAGTCAAGTAACATCTCCATTCAGCTATCGGGGACAATCAAGGCGCCTGATGGACCAAGTGCATGGACAAGTGAGATCGAGCGATGGATAGTGTTT…	MTWYSELAVFGNCQTGVDLVASICILILLSTLATHINVNADDQNTFNVLNYGAVGNGNSDDSLAYAKAWNDACKANAQTPTMIIPKGKTFLVHPITFSGPCKSSNISIQLSGTIKAPDGPSAWTSEIERWIVFGNITGLNINGRGHFDGNGQKWWDQSCKHHPGKAVSFIQCNNVHINEIYVERSPQVHIVVDYSQDVHFKSLIIDSPETSPNTDGIHIARSHDVSVHTSIIAAGDDCISISDQTSNISVTYVNCGPGHGISIGSLGKNGEEVKVENITVRHVNFCKTTNGARIKTWQAGKGQVQHVEFSYMNFTEVQNPIIIDQYYCDQKDVCAKTSTGVHISDVRYLNATGTSATDVAINLDCSNNVACTDIKLENIELQSATEGKGVLSSCKNAFG…	7	11146436	11151635	1								Cs1g12740.1	96.2
CitPG25	Ciclev10027074m	ATGAGGGAACTTTTAATCATAATCTTGATTTTGTCCATGGCAATCTGGGGATCAAGTTTCCAACCCCGTGAGGCATTTCCTTCTTATGCTTCGTCTGTCAGTGTGATCCAGTTTGGAGCTGTAGGAGATGGAGAAACAGATGATTCACAAGCTTTCCTAAAAGCTTGGAAAAGTATTTGTGGATCAAAATCAAATGCTCCACCGCTACTTGTACCGGCTGGCAAAACGTTCCTTTTGAATCCTGTTAGCTTTCAAGGTCCATGCAAGTCCTCTTCCATCAATGTTCAGATTCAAGGAAACATCGTGGCTCCCCACAGTAGTGCCTGGGATGGTCATGATAAGAAGAAATGGCTCCTTTTTTCTAATGTGAATGGCCTTACAGTTAACGGAAATGGAAAA…	MRELLIIILILSMAIWGSSFQPREAFPSYASSVSVIQFGAVGDGETDDSQAFLKAWKSICGSKSNAPPLLVPAGKTFLLNPVSFQGPCKSSSINVQIQGNIVAPHSSAWDGHDKKKWLLFSNVNGLTVNGNGKIDGKGASWWSNKQHQRPTALSFGSCNNLVFRGLMHVDSPGNHISVYGCNDVSISNLKIIAPESSPNTDGIDITHSSNVQIRDCTIATGDDCVAIGTDTSNIAVTGVICGPGHGISIGSLGANGGTSIVEDVHVRDCTFKGTKNGARIKTWQGGSGHARRISFERIKLESSDNPIIIDQYYCGPNDECKNQTSAVKVSDVSYIGFQGTSSTEEAVQLSCSESVGCTDIKINDIDITHSDSGKDTRASCINAHGELYGRLVPSVDCLL…	7	11155501	11158063	1								Cs1g12730.1	96
CitPG26	Ciclev10027137m	ATGCAGGAACTATTTTTCATCATCTCTTTGCTAATGTGCATGGCTACATTGGGTTGGAGCCGATCGTATCCTGGAACAATGCCTTATAACGTTATGAACTTTGGTGCTGTGGGAAATGGAGTTACCGATGATTCCCAAGCTTTTATTAAAGCATGGAACGCGGTTTGTGGAGATACATCAAACAATCCAACCCTTCAGGTTCCTCAGGGGAAAACATTCTTGCTGCAACCTACAAGTTTCCAAGGTCCATGCAAATCTTCCAACCTCCAAGTTCAGATTGAGGGGAATCTCATTGCACCTGAAGGACCGTCAAGTTGGAAAGGAAAGGATCGAAGGTCTTGGCTTTACTTCGCAAATGTCAATGGATTTACTGTTAATGGAAATGGAGAAATTGATGGC…	MQELFFIISLLMCMATLGWSRSYPGTMPYNVMNFGAVGNGVTDDSQAFIKAWNAVCGDTSNNPTLQVPQGKTFLLQPTSFQGPCKSSNLQVQIEGNLIAPEGPSSWKGKDRRSWLYFANVNGFTVNGNGEIDGQGSQWWKLCSDALVFEKCTSFQVSGLKHINSQKNHISLDNCQDATLSNLHISAPESSPNTDGIDISASQNIHILNSNIATGDDCIAINTGSSQINVTGLTCGPGHGISIGSLGKQGEAAAVEEVHVKNCTLNATQNGLRIKTWQGGSGYARKITFNDITLTDVDNPIIIDQFYCPHEQCSNETNAVKISDVSYTGIHGTSITQDAIALNCSRTVGCDNIVLEHIHIASSNSKEGTYSTCINAHGKCDDSVPSVGCLK*	7	11170746	11173835	-1								Cs1g12690.1	50.3
CitPG27	Ciclev10026919m	TGCTTCAATAGCAAATTGTCTGGCTTAATTTCCGTTTTTGCATTTTGCATGTCTTCTATGTGCTATGCGTCAATTCGCATTAATGCTGATGAATTTAACGTTCTGGATTTTGGGGCAGCTGGAGATGGCAATGCAGACGATTCAATGGCTTTCATAAAAGCATGGAATAACACATGCAGTGCCACAGCAAAGTCACCTACAATGGTTATTCCAAAGGGAAAAACATTCTTGGTGCATCCTATAACCTTCACCGGTCCCTGCAAGTCAAGTGATATCACTATTATGCTATCAGGTTCAATCATTGCACCGAACGGTCCTAATGAATGGAAGGAAGACGATAAATCAAAATGGTTCGATATTCAGAGCGTAGACAGTCTGCAAATTGACGGCTCCGGTACG…	CFNSKLSGLISVFAFCMSSMCYASIRINADEFNVLDFGAAGDGNADDSMAFIKAWNNTCSATAKSPTMVIPKGKTFLVHPITFTGPCKSSDITIMLSGSIIAPNGPNEWKEDDKSKWFDIQSVDSLQIDGSGTIDGRGKAWWDISCKINKKEGCVKLAPTVLKFDRCNNLRMNNMNFINSPQTHVTVMGCIGVEFGFLSIQAPGTSPNTDGIHIQASSNVYIHNAHISNGDDCISIGDNTSNINITQVDCGPGHGVSIGSLGKDGGEVHVENITVSNINFKGTTNGARIKTWQVGKGTVKHIVFSNLNFTDVENPIIIDQHYCDVADSCKETDTGVHIDDALYAQSFGTSKTEVAINLNCSSSSPCTNIIVDTIQLKPANPGQRVISSCNNANGQSKGN…	7	11193665	11197537	-1	FGENESH	ATGGATCTATGTGCTATATTATACTTCTTGTACCTCATCTCGACAGCGTCAATTCGCATTAATGCTGATGAATTTAACGTTCTGGATTTTGGGGCAGCTGGAGATGGCAATGCAGACGATTCAATGGCTTTCATAAAAGCATGGAATAACACATGCAGTGCCACAGCAAAGTCACCTACAATGGTTATTCCAAAGGGAAAAACATTCTTGGTGCATCCTATAACCTTCACCGGTCCCTGCAAGTCAAGTGATATCACTATTATGCTATCAGGTTCAATCATTGCACCGAACGGTCCTAATGAATGGAAGGAAGACGATAAATCAAAATGGTTCGATATTCAGAGCGTAGACAGTCTGCAAATTGACGGCTCCGGTACGATAGATGGACGTGGGAAGGCC…	MDLCAILYFLYLISTASIRINADEFNVLDFGAAGDGNADDSMAFIKAWNNTCSATAKSPTMVIPKGKTFLVHPITFTGPCKSSDITIMLSGSIIAPNGPNEWKEDDKSKWFDIQSVDSLQIDGSGTIDGRGKAWWDISCKINKKEGCVKLAPTVLKFDRCNNLRMNNMNFINSPQTHVTVMGCIGVEFGFLSIQAPGTSPNTDGIHIQASSNVYIHNAHISNGDDCISIGDNTSNINITQVDCGPGHGVSIGSLGKDGGEVHVENITVSNINFKGTTNGARIKTWQVGKGTVKHIVFSNLNFTDVENPIIIDQHYCDVADSCKETDTGVHIDDALYAQSFGTSKTEVAINLNCSSSSPCTNIIVDTIQLKPANPGQRVISSCNNANGQSKGNDQPKCCF*	7	11193665	11197473	-1	Cs1g12690.1	49.2
CitPG28								FGENESH	ATGAATACTGAACTGGATTCCAAATTGCTGTTGGTGCTCTTCATTATTTGTTTCAGTGATGCTTTTGCCGGGGGAAGTAGAACAATGATAGCACAGGTGAAGAACATACATTACAAGGAAACTAGCTCTCTTCTAGTCAATGTGAAGGACTTCGGTGCAAGAGCGGATGGTCGTACTGATGACAGCAAAGCTTTCGAAGCAGCATGGAAGGAGGCATGTGAGACAACAGGTGCGGTAACTCTTCTGGTACCTCATGGAACATACCTGATTGGTCCCATTAAGTTCGCAGGCCCCTGCAAAAATGTATCAAATATAACCGTTCAGATGAAGGGTTATCTGATTGCATCGACAAATTTGTCTGAGTATAGATTTGGTGCTGGCTGGGTTGAATTTGGTGGG…	MNTELDSKLLLVLFIICFSDAFAGGSRTMIAQVKNIHYKETSSLLVNVKDFGARADGRTDDSKAFEAAWKEACETTGAVTLLVPHGTYLIGPIKFAGPCKNVSNITVQMKGYLIASTNLSEYRFGAGWVEFGGVEGLTLTGGGTFDGRGAKAWPYNGCPTHFNCKLLPTNVKFVAMKKTIVRRITSVNSKSFHIALVECKNFRGSKIKISAPANSPNTDGIHIERSSSVHVSRSHIGTGDDCISVGQGNSEVTIASITCGPGHGISVGSLGRYPNEGDVRGLVVRDSTMTGTMNGVRIKTWANSPGSSAATNMTFENIIMNNVSNPIIIDQAYCPFTSCPTKPPSRVKLSDIYFKNIRGTSSSAVAVALECSKGIPCQNIYLENVHLDLSSGEKQPTSS…	8	163141	165289	-1	Cs8g01300.1	79.4
CitPG29	Ciclev10030302m	ATGGGTTTCAGCTCCTACTCCCAGCAAGCATTTTCACTACTAGTGTTGTTCATTACTTCGGTAAAAGGTATCGATGCAACCAACAGAGTTTTCAACGTCAAGGACTTTGGTGCCGCGGCCGATGGCATTAAGGATGATAGTAAGGCTTTTGGTACTGCTTGGAGAGAAGCTTGCAACTGGGATGGAATAGAAAGCACGGTATTGGTAACTCCGGGAAAATACTTGTCGAATTTTGTCGAACTTGAAGGTCCATGCAAAGCTCCAATTTCTTTTCAACTTCAAGGGCTTGTCCAGGCACCAACCGGCCTATCAAAACTACCCGATAAACAAAGCTGGATCACCTTTCAATATCTCAGACACTTCACTCTCTCCGGCGAAGGAACATTCCACGGCCAAGGC…	MGFSSYSQQAFSLLVLFITSVKGIDATNRVFNVKDFGAAADGIKDDSKAFGTAWREACNWDGIESTVLVTPGKYLSNFVELEGPCKAPISFQLQGLVQAPTGLSKLPDKQSWITFQYLRHFTLSGEGTFHGQGETAWPLNQCHKNSDCQLPTSMRFNFLNDSTITGIKSVGSKYFHINILGCYNLKINDLKITAHADSPNTNGIHIGRSNGIEISHSVIATGDDCVCLGQGSKNILVSDVFFGPGHGISVGRLGKDTKDEEVVGLTVRNCTFTGTSNGVPSQVKISNVRFNNIRGTSATKVAVSLVCSQKIPCQNIEIGNINLVYNGVNVKVEGPETTSLCSNVKPTLFGKQIPATCV*	8	18984154	18985747	-1								Cs6g12360.1	93.6
CitPG30								FGENESH	ATGGGTTTCAGCTCCTACTCCCAGCAAGCATTTTCACTACTAGTGTTGTTCATTACTTCGGTAAAAGGTATCGATGCAACCAACAGAGTTTTCAACGTCAAGGACTTTGGTGCCGCGGCCGATGGCATTAAGGATGATAATAAGGCTTTTGGTACTGGTTGGAGAGAAGCTTGCAACTGGGATGGAATAGAAAGCACGGTATTGGCACGAACCGGCCTATCAAAACTACCCGATAAACAAAGCTGGATCACCTTTCAATATCTCAGACACTTCACTCTCTCCGGCGAAGGAACATTCCACGGCCAAGGCGAAACTGCATGGCCACTAAATCAATGCCACAAAAACTCCGATTGCCAGCTTCCCACATCCATACGATTCAATTTCCTGAACGACTCAACA…	MGFSSYSQQAFSLLVLFITSVKGIDATNRVFNVKDFGAAADGIKDDNKAFGTGWREACNWDGIESTVLARTGLSKLPDKQSWITFQYLRHFTLSGEGTFHGQGETAWPLNQCHKNSDCQLPTSIRFNFLNDSTITAIKSVDSKYFHINILGCYNLKINDLKITAHADSPNTDGIHIGRSNGIEISHSVIATGDDCVSLGQGSKNILVSDVFFGPGHGISVGSLGKDTKDEEVVGLTEQYIVSWQACNIQEYSGLLSSMHNASKQTSASLYPGDIVTNNVENPIVIDQLYCPYNKCNIKVPSQVKISNVRFNNIRGTSATKVATVAKAVNLNWIQFYLSSCQVQIIASSLKYCTELQEPRLAHNDKKGNTVAKYDKLAKKVKNLLPNLHIFNVRPIDKNT…	8	19101664	19105822	-1	Cs6g12360.1	68.3
CitPG31	Ciclev10004899m	ATGGAGAGTATTCGGGAGCTGTTACTAATTCTACTAGCAGTGATTCTTTTGGTACAAAATTTAAGCAATGTGGAAGCAAGGTACCATCATCACAAGAAACAGAAAAACAAAGGCTCCACTGTTCCTCCCCCGGCTTCTCCAGAGAATCCTGTCTCTTCATCACCTTCATATTCTCCATCAGTCCCCTCAGACCCTTATCCGAATGATCCAGTGAATTCCACTGACTGCATTTTTGATGTAAGAGATTACGGGGCAGTTGGTGATGGCTCTGCCGATGACACCGCTGCTTTCAGGGCTGCATGGAAAGCAGCCTGTGCTGTAGAAGCAGGGGTTGTTCTGGCTCCTTCAGATTATGTTTTCAAAATCACTTCAACAATTTTCTCAGGGCCGTGCAAGCCA…	MESIRELLLILLAVILLVQNLSNVEARYHHHKKQKNKGSTVPPPASPENPVSSSPSYSPSVPSDPYPNDPVNSTDCIFDVRDYGAVGDGSADDTAAFRAAWKAACAVEAGVVLAPSDYVFKITSTIFSGPCKPRLVFQLDGVLMPPDGPDTWPKADSRKQWLVFYKLDDMTFTGKGTIEGNGQPWWDLPCKPHRGPNGSTSSGPCDSPALIRFFMSSNLVVSGLTIQNSPQFHMKFDGCEGVMIDKLSISSPKLSPNTDGIHIENTKSVGIYNSMISNGDDCISIGTGCSDVDIADVTCGPSHGISIGSLGAHYSQACVSNITVRNAIIRESDNGLRIKTWQGGTGCVSDLSFENIQMENVRNCINIDQYYCLSKECLNQTSAVFVTGITYRNIKGTYD…	9	402204	407560	-1	aCL2629Contig1							Cs9g01630.1	100
CitPG32	Ciclev10004942m	ATGAAGATGCCAGTGGCATTGCTTCTGCTGCTGGCATTGTGCAGTGCTATCTTAATCAATGGAGAAGTAAGTGATGGACAATGTGATGATCAACCTACATTAGACCCAAGACCGCATAGTGTGTCAATTACTGAGTTTGGTGCTGTTGGTGATGGGAAAACGTTGAACACACTTGCCTTTCAGAATGCCATTTTTTATCTCAAGTCCTTTGCCGACAAAGGAGGGGCACAGCTGTATGTTCCTTCGGGAAAGTGGCTCACTGGAAGTTTCAATCTTACCAGCCACCTCACCCTCTTCTTGGAAAAGGGTGCTGTCATTCTTGGATCTCAGAATCCATCTCACTGGGACGTTGTGGATCCCTTACCCTCATATGGTCGAGGGATTGAACTTCCTGGAAGA…	MKMPVALLLLLALCSAILINGEVSDGQCDDQPTLDPRPHSVSITEFGAVGDGKTLNTLAFQNAIFYLKSFADKGGAQLYVPSGKWLTGSFNLTSHLTLFLEKGAVILGSQNPSHWDVVDPLPSYGRGIELPGRRYKSLINGYMLRDVVVTGDNGTIDGQGSVWWDWFSSQSLNYSRPHLVEFISSENVVVSNLTFLNAPAYNIHPVYCSNVHIQNISVHAPPESPYTVGIVPDSSDNVCIEDCIIAMGHDAISLKSGWDEYGIAYGRPTTDVHIRRVLLQSSSGSSVAFGSEMSGGISNVQVEKIHLYDSLNGIEFRTTKGRGGYIKQIVISDAELYNINVAFGACGNCGSHPDDDFDPDALPAIDQITFKDIIGTNITIAGNFTGIQEAPFANICLSN…	9	1320160	1323922	-1	aCL3497Contig1							Cs9g03730.1	100
CitPG33								FGENESH	ATGGTGGCACTCGGCATGAGCAGCAGTGTTGCTTGTTTGTCCTTTCTTTATATAACGTCCGTCCTGTCTGCTTCGTGGCAACCAACTCCAGCTCCCAAACCCAATTCACCTGTTTCATCTCCAAATCCAGAAGCCAAGTCCCCAGACCCATCTCCTGCTACAGCTGATTCTCCTGAAACACAGTTACCGCCTACCGCAGAAGGCCTTTTTGATGTCACCGACTATGGAGCAGAACCTGACGGGGAAACCGAGACTAGCTCCCCATTCTTAGAAGCATGGAATGCTGCATGTTCACACAATGGAGACTCAACTTTTTACATACCAGAGGGAACATTCTTGCTCGGTCCAGTATCAATTACCGGCCCTTGTCATAACAACCAGCCCCCAAAAATAGTGATC…	MVALGMSSSVACLSFLYITSVLSASWQPTPAPKPNSPVSSPNPEAKSPDPSPATADSPETQLPPTAEGLFDVTDYGAEPDGETETSSPFLEAWNAACSHNGDSTFYIPEGTFLLGPVSITGPCHNNQPPKIVIKGTLMAPPNLSAFPDTNWIVFQDLHGINISGGNGEVPNIDAQGEVEAWKRNSCSKSEKCNKLITSLRFNNVSHGTISNIAVSNSKGFHVAFLDCDNINVYNVSISSPGDSPNTDGIHVGMSTNINITSSNIGAGDDCISIGPGSSNISVADVKCGPGHGISIGSLGKYTDEEDVVGINVRNCTITGTQNGVRVKTWPGAPASRASNLMFTDIVMINVSNPIIIDQEYCPSNSCKSTSEPSLVELSNIHFKNISGTYNTESGVTLIC…	9	1401112	1402757	-1	Cs9g03850.1	98.6
CitPG34								FGENESH	ATGGCCATCGCAAAAAGAGCTTGCACCAGTATTGCTGCCATATCTCTTCTCTTGTGCTACTCAGCTGTGGTCTCTTGTGAGGTCACCACGGGTGAGGCCACTGGAGAATTCAATGTCTCCGCAGCTAATGCTCGCGCGAATGCTATAAATCGAGGCATTTTAGACCCTACCGCGAAAGTTTTTAACGTGTTACAATTTGGTGCAAAGCCTGGCGACAAGGAAGATCGTCATAACATTGACAGTAACCACATGGCATTTGTTAAGGCATTTGAAGCTGCATGTCATCACGAGGGGAAAGCAAGGCTTGTTATACCAAGAGGTACTTTCGTGCTTGGCCCTGTCACGTTTATGGGGCCATGCAACAACACTCCTCTGATTGTTCAAATCCAAGGAACAATC…	MAIAKRACTSIAAISLLLCYSAVVSCEVTTGEATGEFNVSAANARANAINRGILDPTAKVFNVLQFGAKPGDKEDRHNIDSNHMAFVKAFEAACHHEGKARLVIPRGTFVLGPVTFMGPCNNTPLIVQIQGTIKAITDISEFPGQGEEWVNFQNINGLVVTGSGTFDGQGASCWKYRDTKNDNNVPGQRLPANIQFVEVSNAIVRGITSVNSKGFHYFITGCKNIRLYHLNIIAPDESPNTDGIHISQSDVVKIAKSYIGTGDDCVGMIRGSSNVSVKKVTCGPGHGISLGKYDNEADVKGIIVKDCTLVGTQNGLRIKTYEGKSESRASSMIFQDIVMKDVKHPIIIDQFYGGKDKDSIVKINDIQFINITGTSVSKVAVDIACSKHYPCQNVHLRNI…	9	1403494	1405144	-1	Cs9g03860.1	99.3
CitPG35								FGENESH	ATGGATAAGTTCTTCAGTACTCTTCTTTATGCATTTCTTCTTGTTCTCGGTACCAATAACTTACTCCACTCATCTGCAACATCAACAATCTACAACGTACTAAGATGTGGAGCCAAAGGGAATGGTATCACGGACTCCACGCAGGCATTTGCCAAAGCATGGGCTGCAGCTTGTGCCTCCAACGAATCAGCCACAATATATGTACCAAAAGGAAGATATTTGCTTGGCTCCGTGGCCTTCAGAGGCGAATGCAAAAGCCCGTCTATTACTTTCCTGATTAACGGAACACTAGTGGCTCCAACAGATTACCGCGTACTGGGTCAAGCCAACAATTGGCTTAGCTTTGAAGGTGTTAGCCATGTTTCCATCATCGGTGGAGCACTTGATGCCAAGGGAACT…	MDKFFSTLLYAFLLVLGTNNLLHSSATSTIYNVLRCGAKGNGITDSTQAFAKAWAAACASNESATIYVPKGRYLLGSVAFRGECKSPSITFLINGTLVAPTDYRVLGQANNWLSFEGVSHVSIIGGALDAKGTSLWACKTAAGSNCPNGATTLSITKSNNIRINGLLSLNSQMYHIVINRCQDVLVEGAKIIAAGDSPNTDGIHVQQSRNVIIKSSSIKTGDDCISIGPGTNNLWIERVTCGPGHGISIGSLAKDLDEEGVQNVTVFKTVFTGTTNGLRIKSWARPSNGFVQGIRFIDALMQNVQHPIIIDQNYCPHNLNCPGQISGVKISDVIYQDIRGTSATPIAIKFDCSSKYPCKGIRLHNVHLRHLKQEAKSSCNNPAGFLRYKDVATYRFNTY…	9	2574071	2587555	1	Cs9g05530.1	85.7
CitPG36								FGENESH	ATGGCTAAGTTCTTAATCAGTCTTATTTTTTCCATATTTCTTTTCACTGTCTCTAATAATTTAAACCCATCAGCAGCAACATCATCGGTTTATAACGTGCTAAGGTTCGGAGCCAAAGGCAATGGTGTGATAGATTCCACAGAAGCATTTGCCAAAGCATGGGCTGCAGCTTGTGCCTCCAACGAATCAACAATAATATATGTACCAAAAGGAAGGTATCTGCTAGGCTCAGTGGCATTCAAAGGTGAATGCCAAAGCTCAGATATTACTTTCCAGATTGATGGAACCCTTGTGGCTCCAGCGGATTACCGTGTGCTGGGTCAAGCTGACAATTGGCTTAGCTTTGAAGGAGTCAGCGGTGTTTCCATCATTGGTGGGGCACTCGATGCCAAGGGAACT…	MAKFLISLIFSIFLFTVSNNLNPSAATSSVYNVLRFGAKGNGVIDSTEAFAKAWAAACASNESTIIYVPKGRYLLGSVAFKGECQSSDITFQIDGTLVAPADYRVLGQADNWLSFEGVSGVSIIGGALDAKGTSLWACKAAAGTTCPNGATTLSITNSNNVSIKGLLSLNSQMYHIVINRCQDVLVEGAKIIAAGDSPNTDGIHIQQSRNVKIRSSSIKTGDDCISIGRGTYNLWIERVTCGPGHGISIGSLGKDMDEEGVQNVTVWKTVFTGTQNGLRIKSWARPSNGFVKGVRFIDAVMQNVQNPIIIDQNYCPHNLNCPGQVSGVKISDIIYWNIRGTSSTPIAIKFNCSAKYPCEGIRLYKVNLSYLKLVAQSSCNNVIGKALGIVQPNTCL*	9	2589576	2591104	1	Cs9g05540.1	99.7
CitPG37								FGENESH	ATGGAGAGGCTTTTCAGTTCGCTTTTCAGTTCTCTTTTCATAATTCTTTTCATTTTGTCAATTAACTTGGCCTCATCATATGCAACAACGACAACTTATAATGTGTTGAGTTTTGGTGCCAAAGGCAATGGTGTCACAGACTCCACTCAAGCATTTGCCAAAGCATGGGCTGCAGCTTGTGCCTCCACAGAATCAGCCACATTATATGTACCAAAAGGAAGGTATCTGCTCGGCTCTGTGGCATTCAATGGTGATTGCAAAAGCTCAGATATAACTTTCCGGATTGATGGAACCCTTGTGGCTCCGGCGGATTACCGTGTACTGGGTCAAGCTGACAATTGGCTTAGCTTTGAAGGAGTCAGCGGCGTTTCCATCATCGGTGGGGCACTCGATGCCAAG…	MERLFSSLFSSLFIILFILSINLASSYATTTTYNVLSFGAKGNGVTDSTQAFAKAWAAACASTESATLYVPKGRYLLGSVAFNGDCKSSDITFRIDGTLVAPADYRVLGQADNWLSFEGVSGVSIIGGALDAKGSSLWACKASGTNCPDGATTLSFTNSNNIRINGLLSLNSQMFHIVINGCKDVHVEGVTVIAPGNSPNTDGIHVQLSMNVKITNCTIKTGDDCIPIGPGTKNLWIERVTCGPGHGISIGSLAKDLVEEGVQNVTVFKTVFTGTTNGFRIKSWARPSNGFVQGVLFIDAVMRNVQFPIVIDQNYCPHNLNCPGQVSGVKISDVIYQDIRGTSATPIAIKFDCSPKYPCQGIRLQNINLRHLKQEAQSSCNNTKFIVTPLTLEWPSLGL…	9	2594495	2595999	1	Cs9g05550.1	93.5
CitPG38								FGENESH	ATGGATTACAGCTCTTGCTCTCAGCTGCTAGTACTTGCAATACTAGTTTTGTTTACTTCGGCCCAAAATATAATCAATGCAGCTTCCAACGGAGTTTTCAATGTAATTGACTTTGGTGCTATGGCCGATGGCATTAGAGATAACAGTAAGGCTTTTGAAAATGCTTGGAGAGAAGCTTGCAATTGGAATACCTACAGCACAGTATTGGTTCCACCAGGAAAATACTTAGCGACTTCTGTTGTATTTAAAGGTCCATGCAAAGCTCCAATTTCATTCCAACTTCAAGGCCTTATCCTGGCTCCCCCCGGTCTGTCAAAACTAGCCGATAAGGAAAGCTGGATCACCTTTGAATCCCTCAGAAGCTTCACTCTCACCGGCGGTGGAACTTTCCATGGCCAA…	MDYSSCSQLLVLAILVLFTSAQNIINAASNGVFNVIDFGAMADGIRDNSKAFENAWREACNWNTYSTVLVPPGKYLATSVVFKGPCKAPISFQLQGLILAPPGLSKLADKESWITFESLRSFTLTGGGTFHGQGRTAWPENECHKNSNCQLPISIRFNKLNDSTITGVQSVDSKFFHINILGCYNLKLNKINISAPDDSPNTDGIHIGRSNGIEISNSIIATGDDCVSLGDGSQNVLVSDVSCGPGHGISVGSLGKYKKEEDVVGLAVINCTFTGTSNGVRIKTWPDSEDGKASNFTFEDLFMNNVENPIVIDQEYCPHNQCNIKVPSRVKISNVRFRNIRGTSLTKEAVRIVCSKEIPCQNVEIGDINLVYNGIDDKGPAISSCSNVKPTLVGKQIPA…	9	23717867	23719304	-1	Cs9g12940.1	99
CitPG39	Ciclev10006970m	ATGGATTATAGCTCTTGCTCTCAGCTGCTAGTACTTGCAATCCTAGTTTTGTTTACTTTGGCCCAAAATATAATCAATGCAGCTCCCAACGGAGTTTTCAATGTAATTGACTTTGGTGCTGTGGCCGATGGCATTAGAGATAACAGTAAGGCTTTTGAAAATGCTTGGAGAGAAGCTTGCAATTGGAATACCTACAGCACAGTATTGGTTCCACCAGGAAAATACTTGGTGACTTCTGTTGTATTTAAAGGTCCATGCAAAGCTCCAATTTCATTTCAACTTCAAGGCCTTATCCTGGCTCCCCCCGGTCTGTCAAAGCTAGCCGATAAGGAAAGCTGGATCACCTTTGAATCCCTCAGAAGCTTCACTCTCACCGGTGGTGGAACTTTCCATGGCCAG…	MDYSSCSQLLVLAILVLFTLAQNIINAAPNGVFNVIDFGAVADGIRDNSKAFENAWREACNWNTYSTVLVPPGKYLVTSVVFKGPCKAPISFQLQGLILAPPGLSKLADKESWITFESLRSFTLTGGGTFHGQGRTAWPENQCHKNSNCQLPISIRFNKLNDSTITGVQSVDSKFFHINILGCYNLKLNKINISAPDDTTGDDCVSLGDGSQNVLVSDVSCGPGHGISVGSLGKYKKEEDVVGLTVINCTFTGTSNGVRIKTWPDSEDGKASNFTFEDLFMNNVENPIVIDQEYCPHNQCNIKVPSRVKISNVRFRNIRGTSLTKEAVRIVCSKEIPCQNVEIGDINLVYNGIDDKGPAISSCSNVKPTLVGKQIPATCV*	9	23836791	23838227	-1								orange1.1t05100.1	92.5
CitPG40	Ciclev10005317m	ATGCAGGCTTGGAAAGAAGCTTGTTCAAATACAGGAGCTGTAATTGTTGTAGTGCCCGTAGACAAAACCTACCGCCTTAAGCCAATTAGATTCTCAGGTCCATGCAAAGCTAATCTCACAGTGCAGATATATGGAACTTTAGAGGCATCTGATGATCAATCAGACTACAAGAAAGATGGCAGGCACTGGATTGTTTTCGATAATGTACAAAATTTAGTAGTCGAAGGTGGTGGCACTGTCAATGGCAATGGCAAGATTTGGTGGGAAAATTCATGCAAAATCAATAAATCTCTGCCATGCAAAGATGCCCCAACGGCACTGACGTTCTATAAAGGCAACAATTTGGTAGTGAGCAATCTGAAAATTCAAGATGCCCAGCAAATACATGTTTCTTTCCAA…	MQAWKEACSNTGAVIVVVPVDKTYRLKPIRFSGPCKANLTVQIYGTLEASDDQSDYKKDGRHWIVFDNVQNLVVEGGGTVNGNGKIWWENSCKINKSLPCKDAPTALTFYKGNNLVVSNLKIQDAQQIHVSFQKCKNVLAFNLMVTAPGDSPNTDGIHVTNTQNIRITSSTIGTGDDCISIVSGSQNVQAQDITCGPGHGISIGSLGKGNSNAYVSEVTVDGAKLSGTANGVRIKTWQGGSGYASNIIFQNIDMVNVKNPIIIDQNYCDQDDPCKEQGSAVHIKNVVFKNIRGTSASDEAVKLDCSKSYPCEAIVLENINLQSEEDEPKALCNNVDDLAQRGSVFPRCP*	9	25065447	25067379	-1	aC01018C01SK_c|FGENESH	ATGGCTCTAGAAAGACATTCCGTTCAATTATTGTTCTTCACAATCTTTATAATATCTTACATCTCACGTTACACATTGTGCTTGGCCAATTATCATGAGCCACCTTATGGCAGTAATTATTACCTTGATGAAATATATGAGTATGGATATGATTCTCAAGCATATCCTTCATATTTGAGCTCTATTGAAGATGGCAAGTCCAAGGATTTGATCAAGCAAAGAACCCAAATCTTGAACTTGAAAAATGTTGGTGGCTTTTCAAAGAGAGGTAAAACCGTTAATGTTGATGATTTTGGAGCCAAAGCCGATGGTACCGATGACTCTAAGGCATTTATGCAGGCTTGGAAAGAAGCTTGTTCAAATACAGGAGCTGTAATTGTTGTAGTGCCCGTAGACAAA…	MALERHSVQLLFFTIFIISYISRYTLCLANYHEPPYGSNYYLDEIYEYGYDSQAYPSYLSSIEDGKSKDLIKQRTQILNLKNVGGFSKRGKTVNVDDFGAKADGTDDSKAFMQAWKEACSNTGAVIVVVPVDKTYRLKPIRFSGPCKANLTVQIYGTLEASDDQSDYKKDGRHWIVFDNVQNLVVEGGGTVNGNGKIWWENSCKINKSLPCKDAPTALTFYKGNNLVVSNLKIQDAQQIHVSFQKCKNVLAFNLMVTAPGDSPNTDGIHVTNTQNIRITSSTIGTGDDCISIVSGSQNVQAQDITCGPGHGISIGSLGKGNSNAYVSEVTVDGAKLSGTANGVRIKTWQGGSGYASNIIFQNIDMVNVKNPIIIDQNYCDQDDPCKEQGSAVHIKNVVF…	9	25064865	25067379	-1	Cs9g12470.1	97.4
CitPG41	Ciclev10004869m	ATGGTGACTTATCTCTCTCGATTTACAATAACAATAATCGGTCTCCTCGTCATCATCCAATCAACCCCCTCCACGTCATCACCCAACAACAGCGTCCAACTCCTCCTCCTCTCCACCACCCATATTCACATTCACTCGGTCATCGACTTCGGGGCAAAAGGAGACGGCATCCACTACGACACGGCCGCCATCCAATCAGCCATCGACGCGTGTCCCCCCGGCAACAAACCATGCGAGGTCCGCTTCCCGCCGGGGGAATACCTGACCGCCACCATCCGGCTGAAATCGCACGTGACCCTCAACATCCACGAAGACGCCACCCTCCTGGGAGGCCCGAGGATCGAGGACTACCCGGAGGAGTCCTCGAGGTGGTACGTGGTGCTGGCGGAGAACGCGACC…	MVTYLSRFTITIIGLLVIIQSTPSTSSPNNSVQLLLLSTTHIHIHSVIDFGAKGDGIHYDTAAIQSAIDACPPGNKPCEVRFPPGEYLTATIRLKSHVTLNIHEDATLLGGPRIEDYPEESSRWYVVLAENATDVGITGGGVVDGQAMKFVVTKNEIKNVMVSWNHTGACSGDECRPRLVGFLGCRNVNVWNVRLREPAYWCLHIVRCDNTFIRDMSIYGDFNTPNNDGIDIEDSNNTVITRVQIDTGDDAICPKTYTGPLYNLTATDSWIRTKSSAIKLGSASWFDFKALVFDNITIVESHRGLGFQIRDGGNVSDVTFSNINISTRYYDPSWWGRAEPIYVTTCPRDTKTKEGTISNLLFVNITAKSENGVFLSGSKHGLLKNLSFINMNVTYKRWT…	9	25658750	25661504	-1	aCL1063Contig1|aC18008C05Rv_c							Cs9g13990.1	99.6
CitPG42	Ciclev10004864m	ATGGAGTTTTGTCTAAAATCAAGAAATAATATTCTCCATCCCCATGTTATTAAAATTCTCTCAACGTTGTTGACATTGGGATTGCTTAGTCCGCAAGTAGCAGAATGCAGACCAACCAAGAATTCATACACCATTGAGTTTCAGGCACTAAATTGCCGGAAACACAGCGCAGTTTTGACTGATTTCGGCGGCGTCGGCGACGGCAAAACCTCCAACACAAAGGCGTTTAATACTGCAATTTCTAATCTAAGCAAATATGCAGCAGATGGTGGAGCTCAGCTGATCGTACCACCCGGGAAATGGTTAACCGGAAGCTTTAATCTCACCAGCCATTTCACTCTTTATATTCACAAAGATGCTCTTCTTCTCGCATCCCAGGATGAATCAGAGTGGCCTCTT…	MEFCLKSRNNILHPHVIKILSTLLTLGLLSPQVAECRPTKNSYTIEFQALNCRKHSAVLTDFGGVGDGKTSNTKAFNTAISNLSKYAADGGAQLIVPPGKWLTGSFNLTSHFTLYIHKDALLLASQDESEWPLLPPLPSYGRGRDEPGGRFSSLIFGTNLTDVVVTGGNATINGQGEPWWIKYRKKQFNVTRPYLIEVMFSDNVQISNLTLIDSPSWNVHPVYSSNVLIQGLTIRAPIDSPNTDGINPDSCTNTRIEDNYIVSGDDCVAVKSGWDEYGIKVGMPTQHLIIRRLICISPDSAAIALGSEMSGGIKDVRAEDITAINTQSGVRIKTAVGRGAYVKEIYVRRMTMKTMKYVFWMTGDYGSHPDPGFDPKALPTVTGINYRDMVADNVTQSAK…	9	29500559	29503424	1	aIC0AAA85AB02RM1_c							Cs9g19250.1	100
CitPG43								aCL675Contig4	ATGTCAACATCAATGTCTTTGCCTATTAAATTTTTACCATTTCTTTTGATTCTCTTCTTTAGTTCATCTTTAGCAATTCCTTTGAGTTACAACGTGCTGAGCTTCGGAGCCAGACCCGATGGCCAGACTGACTCAGTAAAATCCTTTCTTGCTGCATGGGCTCAAGCCTGTGGCTCGGCCGAGGCCGCAACCATTTACGTGCCACCGGGGAGGTACTTACTAAGCAATGTTGTGTTTCAAGGCCAATGCAAGAACAATGATATTACCATACGTATTGACGGGACTCTGGTGGCTCCAGCTGATTATCATGTTATCGGAAATGCCGAAAACTGGATTTTATTTGAGCATGTTAGCGGGGTTTCTATTAATGGTGGCGTTCTTGATGGCCAAGGTGCTGGC…	MSTSMSLPIKFLPFLLILFFSSSLAIPLSYNVLSFGARPDGQTDSVKSFLAAWAQACGSAEAATIYVPPGRYLLSNVVFQGQCKNNDITIRIDGTLVAPADYHVIGNAENWILFEHVSGVSINGGVLDGQGAGLWACKKSDNSNCPSGATTLRFSNSNNVVINGLASVDSQMFHIVINGCNDVKVQGVKVSAAGDSPNTDGIHVQSSSGVTILDSKIGTGDDCVSVGPGATNLWIENVACGPGHGISIGSLGKEQQEAGVQNVTVTSVTFTGTQNGVRIKSWGRTSSGFARNILFQHALMKNVDNPIIIDQNYCPDNNNCPGQASGVKISDVIYQDIHGTSATEVGVKLDCSSKNPCTGISLEDVKLSYKNQPAEASCTNADGSASGFVLPNSCLKT*	???				orange1.1t02532.1	99
GH29s α -L-fucosidases
CitFUC1	Ciclev10028210m	ATGAAGAAGAACAAGAACAACTGCACAAAACCCATCTCACAAAACCTCATCCTAACTCTGCTCGCACTATATTTCATCCCGATTTCCAATTCTCCCCTCAAAAAGCCACCCCCTCTTCCCATTTTACCCCTGCCCTCGTCACCCCAGCTCGAATGGCAGCTCTCTTCAATGGCACTCTTCCTCCACTTTGGACCTAACACCTTCACGGATTCCGAGTGGGGCACGGGGAGGGCCGACCCGAGAGTCTTCAACCCGACCCGATTAAACGCCTCTCAGTGGGTCCACGCGGCTAAAAGCGCCGGCTTTAACCGCGTGATACTCACTGCTAAACACCATGATGGGTTCTGTCTGTGGCCGAGCGAGTATACGGATTACTCAGTGAAGTCCAGTGAGTGGAAA…	MKKNKNNCTKPISQNLILTLLALYFIPISNSPLKKPPPLPILPLPSSPQLEWQLSSMALFLHFGPNTFTDSEWGTGRADPRVFNPTRLNASQWVHAAKSAGFNRVILTAKHHDGFCLWPSEYTDYSVKSSEWKNGTGDVVAELALAAKEAGVDLGLYLSPWDRHEPSYGKTLEYNEFYMAQMAELLTRYGEIKEVWLDGAKGEGEKDMEYFFDSWFSLIHQLQPRAVIFSDVGPDTRWIGDEAGVAGSTCWSLFNRSDAKIGGTDPRYSQGGDPHGHDWVPAECDVSIRRGWFWHASEAPKSAVELLDLYYKSVGRNCLLLLNVPPNSSGLISAEDIQVLQEFSDLRKSIFSYNLAENALVSASSTRGGISSSQFDPHNVMKEGIYTYWAPEENQSDWT…	8	21357003	21359868	-1	aCL364Contig1							Cs8g15770.1	98.1
CitFUC1A	Ciclev10028463m	ATGAAGAAGAACAAGAACAACTGCACAAAACCCATCTCACAAAACCTCATCCTAACTCTGCTCGCACTATATTTCATCCCGATTTCCAATTCTCCCCTCAAAAAGCCACCCCCTCTTCCCATTTTACCCCTGCCCTCGTCACCCCAGCTCGAATGGCAGCTCTCTTCAATGGCACTCTTCCTCCACTTTGGACCTAACACCTTCACGGATTCCGAGTGGGGCACGGGGAGGGCCGACCCGAGAGTCTTCAACCCGACCCGATTAAACGCCTCTCAGTGGGTCCACGCGGCTAAAAGCGCCGGCTTTAACCGCGTGATACTCACTGCTAAACACCATGATGGGTTCTGTCTGTGGCCGAGCGAGTATACGGATTACTCAGTGAAGTCCAGTGAGTGGAAA…	MKKNKNNCTKPISQNLILTLLALYFIPISNSPLKKPPPLPILPLPSSPQLEWQLSSMALFLHFGPNTFTDSEWGTGRADPRVFNPTRLNASQWVHAAKSAGFNRVILTAKHHDGFCLWPSEYTDYSVKSSEWKNGTGDVVAELALAAKEAGVDLGLYLSPWDRHEPSYGKTLEYNEFYMAQMAELLTRYSQGGDPHGHDWVPAECDVSIRRGWFWHASEAPKSAVELLDLYYKSVGRNCLLLLNVPPNSSGLISAEDIQVLQEFSDLRKSIFSYNLAENALVSASSTRGGISSSQFDPHNVMKEGIYTYWAPEENQSDWTLLINLQEPVSFNVLQVQEPIHMGQRIIKFHLDILNEEGTWKKVINGTTVGYQRLLQFPTVKSQQLRFVIDKSRAEPLIS…	8	21357003	21359868	-1	aCL364Contig2							Cs8g15770.1	83.1
GH31s α -xylosidases
CitXYL1	Ciclev10014196m	ATGAAGAAACCAGAAAAATCTGCTGCTGCTTCTTATCATCAACATCTTTCATTATTACTTTTATTTCTCTATTGCATTTTTGTAGCTGCAGAGAAAGATTTAGTTGGGTATGGCTACTCTGTTCGATCAGTCGCTGTTGACTACTCACTGAAGTCGTTGACTGCTGGACTTGGCCTCATCAGGTCCTCCTCTGTTTACGGACCTGATATTCAGAGCCTCAATCTTTTTGCCAGCTTTGAGACAAAAGACCGTTTGAGAGTTCGAATAACAGATTCCAAAAAACAGAGATGGGAAATCCCGCAGGAAATCATCCCGCGCCAATCCTATTGCACTCACCGCTGGCTGCCGGAAAACAGACTAAAATCACCGGTAAACCACCAAAGAGGGCCGGGAAACCAC…	MKKPEKSAAASYHQHLSLLLLFLYCIFVAAEKDLVGYGYSVRSVAVDYSLKSLTAGLGLIRSSSVYGPDIQSLNLFASFETKDRLRVRITDSKKQRWEIPQEIIPRQSYCTHRWLPENRLKSPVNHQRGPGNHFLSDPTSDLVFTLHNTTPFGFSVTRRSSGDILFDTSPETSDSDTFLVFKDQYIQLSSALPIERSHLYGIGEHTKKSFKLTPNDTLTLWNADVGSVNVDVNLYGSHPFYIDVRSPNGTTHGVLLLNSNGMDVVYTGDRITYKVIGGIIDLFFFAGPSPDSVIQQYTELIGRPAPMPYWSFGFHQCRYGYENVSDLKAVVAGYAKAGIPLEVMWTDIDYMDGYKDFTLDPINFPVKSMQNFVNTLHQNGQRYVLILDPGISVNETYGT…	2	30325132	30329333	-1	aIC0AAA17AC09RM1_c|aIC0AAA32AF02RM1_c							Cs2g11060.1	97.9
CitXYL2	Ciclev10014274m	ATGAAGCAAACAGAAAAAACTGCTGCTTCTTCTCATCATCGATATCTTTCATTATTACTTTTATTTCTCTGTTGCATGTTTGTAGCTGCAGATAAAGAATCAGTTGGGTATGGCTACTCTGTTCGATCAGTCGCTGTTGACTCCTCACTGAAGTCGTTGACTGCTGGACTTGGCCTCATCAGGTCCTCCTCTGTTTACGGACCTGATATTCAGAGCCTCAATCTTTTTGCCAGACTAAACTCACCGGTAAACCACCAAACAGGGCCAGGAAACCACTTCCTCTCCGACCCCACCTCAGACTTAGTCTTCACCCTCCACACCACCCCATTTGGCTTCTCGGTCACACGGCGATCCTCCGGCGACATTCTTTTCGACACATCACCTGAAACCTCAAACTCT…	MKQTEKTAASSHHRYLSLLLLFLCCMFVAADKESVGYGYSVRSVAVDSSLKSLTAGLGLIRSSSVYGPDIQSLNLFARLNSPVNHQTGPGNHFLSDPTSDLVFTLHTTPFGFSVTRRSSGDILFDTSPETSNSDTFLVFKDQYIQLSSALPIERSHLYGIGEHTKKSFKLTPNDTLTLWNADEYSVNVDVNLYGSHPFYIDVRSPNGTTHGVLLLNSNGMDVVYTGDRITYKVIGGIIDLYFFPGPSPDSVIQQYTELIGFHQCRYGYENVSDLKAVVAGYAKAGIPLEVMWTDIDYMDGYKDFTLDPINFPVNSMQNFVNTLHQNGQRYVLILDPGINVNETYGTFIRGLKADIFIKRDGVPYLGEGWPGKVYYPDFVNPAAETFWKGEIQLFRDILP…	2	30339200	30343118	-1								Cs2g11060.1	89.7
CitXYL3	Ciclev10017610m	ATGGATACAGAAAAAAGAGCTTCTTTGTGTCAACATGCCATATTCTTACTTGCAGTACATTTTTGCTACTACATTTTGGCATTAGACTCGTGTAGTGTTAGTGTAGCTGCAGCAAAAGATCAAGAACCCGTTGGATATGGCTATTCTATTCTATCGTCATCATCAGCCACCGTTGACACCTCTCTAAAGTCATTAACGGCTGATCTTAGCCTCATCAAAAACTCCTCCGTTTATGGCCCCGATATTTACTACCTGAATCTCTTTGCCAGATTCTATCTCTGTGTCACTGCATGCAGCTTGGAAACCAAAGACCGTTTGAGAGTCCGAATAACAGATTCCAATAACCAGAGATGGGAAATCCCACAAGAAATAATCCCCCGCCAATTTCATCCGACAGAC…	MDTEKRASLCQHAIFLLAVHFCYYILALDSCSVSVAAAKDQEPVGYGYSILSSSSATVDTSLKSLTADLSLIKNSSVYGPDIYYLNLFARFYLCVTACSLETKDRLRVRITDSNNQRWEIPQEIIPRQFHPTDATSDLVFTLHNTTPFGFSVSRRSSGETLFDTSPEGSNADTFLVFKDQYIQLSSALPKGSAHLYGLGEHTKKSLKLTPDNNDTLTLWNADLFAAYLDVNLYGSHPFYIDVRSPNGTTHGVLLLNSNGMDVVYTGDRITYKVIGGIIDLYFFAGPSPDSVIQQYTEFIGRPAPMPYWSFGFHQCRYGYKNVSDLEAVVAGYAKAGIPLEVMWTDIDYMDGYKDFTLDPINFPADQMKKFVDTLHQNGQRYVLILDPGISVNNSYETYI…	2	30442034	30445127	1		ATGGATACAGAAAAAAGAGCTTCTTTGTGTCAACATGCCATATTCTTACTTGCAGTACATTTTTGCTACTACATTTTGGCATTAGACTCGTGTAGTGTTAGTGTAGCTGCAGCAAAAGATCAAGAACCCGTTGGATATGGCTATTCTATTCTATCGTCATCATCAGCCACCGTTGACACCTCTCTAAAGTCATTAACGGCTGATCTTAGCCTCATCAAAAACTCCTCCGTTTATGGCCCCGATATTTACTACCTGAATCTCTTTGCCAGCTTGGAAACCAAAGACCGTTTGAGAGTCCGAATAACAGATTCCAATAACCAGAGATGGGAAATCCCACAAGAAATAATCCCCCGCCAATTTCATCCGACAGGTCACAACCGCTCTCTGCCGGAAAACCAC…	MDTEKRASLCQHAIFLLAVHFCYYILALDSCSVSVAAAKDQEPVGYGYSILSSSSATVDTSLKSLTADLSLIKNSSVYGPDIYYLNLFASLETKDRLRVRITDSNNQRWEIPQEIIPRQFHPTGHNRSLPENHFLSDATSDLVFTLHNTTPFGFSVSRRSSGETLFDTSPEGSNADTFLVFKDQYIQLSSALPKGSAHLYGLGEHTKKSLKLTPDNNDTLTLWNADLFAAYLDVNLYGSHPFYIDVRSPNGTTHGVLLLNSNGMDVVYTGDRITYKVIGGIIDLYFFAGPSPDSVIQQYTEFIGRPAPMPYWSFGFHQCRYGYKNVSDLEAVVAGYAKAGIPLEVMWTDIDYMDGYKDFTLDPINFPADQMKKFVDTLHQNGQRYVLILDPGISVNNSY…	2	30442034	30445160	1	Cs2g10900.1	98.9
CitXYL4	Ciclev10033422m	ATGCCCATCATTATCACGTGCGTGCCCAAGAAAGGGGTTCATCCGCCTCACATGTATCTAAATTCTAATGAACGTCGCATTTCTCACATCACTCGGTCGCAGTTCACACTCTCTTTGTGTCAATGTGTGTATATATATATTAAATCTTTCAGCGCACACACAGTCTCAGTAGCTTCAATAGGCAAAGGCTACCGTCTGATCTCCATTGAGGAGGTTGATGGAGGCATTCTGGGCCATCTCCAAGTCAAAGAGAAAAACAATATCTATGGCCCAGATATCCCTCTCTTGCAGCTCTATGTCAAGCATGAAACTGAAGATCGATTGAGAGTTCACATAACAGATGCACAGAAGCAAAGATGGGAAGTACCGTACAATCTTTTACCGAGAGAGCAGCCACCG…	MPIIITCVPKKGVHPPHMYLNSNERRISHITRSQFTLSLCQCVYIYIKSFSAHTVSVASIGKGYRLISIEEVDGGILGHLQVKEKNNIYGPDIPLLQLYVKHETEDRLRVHITDAQKQRWEVPYNLLPREQPPKLKQTIGRTRKNPIAVSEYSSNGLIFSYSADPFSFAVKRKSNGETLFNTSSDESDPFGPMVFKDQYLEISTKLPKDASLYGLGENTQPHGIKLYPNDPYTLYTTDVSAINLNTDLYGSHPVYMDLRNVNGEGAAHGVLLLSSNGMDVFYTGTSLTYKIIGGVFDFYFFAGPSPLAVVDQYTAFIGRPAPMPYWSLGFHQCRWGYHNLSVVEDVVENYKKAKIPLDVIWNDDDHMDGHKDFTLNPTNYPRPKLLAFLEKIHKIGMKY…	4	19340763	19345467	-1	aCL6235Contig1|FGENESH	ATGACATCCTCTTTGTGCTTCTTTTCTTTTCTTCTGGCTTTGCTATTATGTATCTTGAGTGCAAACTCTTCCTCCACTCCACCTACCAAGATAGGCAAAGGCTACCGTCTGATCTCCATTGAGGAGGTTGATGGAGGCATTCTGGGCCATCTCCAAGTCAAAGAGAAAAACAATATCTATGGCCCAGATATCCCTCTCTTGCAGCTCTATGTCAAGCATGAAACTGAAGATCGATTGAGAGTTCACATAACAGATGCACAGAAGCAAAGATGGGAAGTACCGTACAATCTTTTACCGAGAGAGCAGCCACCGAAGCTAAAACAAACCATTGGAAGAACGCGAAAGAACCCAATAGCAGTCTCTGAGTATTCAAGCAATGGCCTTATTTTTAGCTACTCA…	MTSSLCFFSFLLALLLCILSANSSSTPPTKIGKGYRLISIEEVDGGILGHLQVKEKNNIYGPDIPLLQLYVKHETEDRLRVHITDAQKQRWEVPYNLLPREQPPKLKQTIGRTRKNPIAVSEYSSNGLIFSYSADPFSFAVKRKSNGETLFNTSSDESDPFGPMVFKDQYLEISTKLPKDASLYGLGENTQPHGIKLYPNDPYTLYTTDVSAINLNTDLYGSHPVYMDLRNVNGEGAAHGVLLLSSNGMDVFYTGTSLTYKIIGGVFDFYFFAGPSPLAVVDQYTAFIGRPAPMPYWSLGFHQCRWGYHNLSVVEDVVENYKKAKIPLDVIWNDDDHMDGHKDFTLNPTNYPRPKLLAFLEKIHKIGMKYIVIIDPGIGVNSSYGVYQRGIANDVFIKY…	4	19340656	19345273	-1	Cs7g13250.1	99.8
CitXYL5	Ciclev10000200m	ATGACGAGTCGGAGTCCTGCAACTATTTCCCTTTCTCTCATTTTACTCGCCTTTCTCACTTACCAAGCACCACCCGTACTCTCATGGAAGAAGGACGAGTTCCGGAACTGCAACCAGACACCCTTCTGCAAACGCGCCAGATCCCGCAATCCTTTTTCCTGCTCTTTAATCGCCAACCAAGTCACCATCTCCGACGATGGTGATATCTCTGCCAAACTCGTCCCAAAAAACCACGATGATCATCATCAAATCAACCCCTTAATTCTTTCCCTCTCCATCTACCAAGACGGCATCGTGCGCCTCAAGATCGACGAGGACCCCACCTTAAACCCTCGCAAACAACGCTTCCAAGTTCCCGATGTTGTCCTACCGCAATTTGAGTCCAAGAAGCTCTATTTG…	MTSRSPATISLSLILLAFLTYQAPPVLSWKKDEFRNCNQTPFCKRARSRNPFSCSLIANQVTISDDGDISAKLVPKNHDDHHQINPLILSLSIYQDGIVRLKIDEDPTLNPRKQRFQVPDVVLPQFESKKLYLQRYSKETIDGEGDASVVYLSDGYEAVLRHDPFEVYVRYKGGNSRVLSLNSNGLFDFEPLREKNEGEEWEERFRGHTDTRPYGPQSISFDVSFYDSDYVYGIPEHATSFALKPTRGPNVEESEPYRLFNLDVFEYLHDSPFGLYGSIPFMISHGKSGRTSGFFWLNAAEMQIDVLGDGWNAESGILLPSKQKRIDTFWMSEAGIVDTFFFVGPGPKDVVRQYTSVTGMPSMPQLFSIAYHQCRWNYRDEEDVEQVDSKFDEHDIPYD…	5	15888737	15896759	1	aCL7447Contig1							Cs1g08360.1	100
CitXYL6	Ciclev10000152m	ATGGCGGCGGAGGCGATCGCTTCCTCGGACGTCGTTTCAGGTGACATGATTTTTGAACCGGTTTTGGAGGAAGGAGTTTTCCGGTTCGATTGTTCGGCGAGTGATCGTCAAGCAGCGTATCCGAGTCTCTCGTTTGTGAATGGAAAGGATAGGGACACGCCAATCTCGACTCGCACGCGCCCTTCATATACTCCCACTTTTCAATGTGTCCGCGGTCAACAGATAGTCAAACTTGAGTTTCCTGCTGGTACCTCGTTGTATGGAACTGGGGAAGTTAGTGGTCAGCTAGAGCGGACGGGAAAGAGAATTTTTACATGGAACACGGACTCGTGGGGCTATGGTACTGAAACAACGTCCTTGTATCAGTCACATCCTTGGGTGCTTGCTGTTCTTCCAAAT…	MAAEAIASSDVVSGDMIFEPVLEEGVFRFDCSASDRQAAYPSLSFVNGKDRDTPISTRTRPSYTPTFQCVRGQQIVKLEFPAGTSLYGTGEVSGQLERTGKRIFTWNTDSWGYGTETTSLYQSHPWVLAVLPNGEALGVLADTTRRCEIDLRKESTIQFTAPSSYPVITFGPFTSPTAVLVSLSHAVGTVFMPPKWSLGYHQCRWSYDSDKRVREICRTFREKGIPCDAIWMDIDYMDGFRCFTFDKERFPDPKSLAACLHLNGFKAIWMLDPGIKHEDGYFVYDSGSKIDVWIQKADGTPFIGEVWPGPCVFPDYTQSKVRSWWASLVKDFIYNGVDGIWNDMNEPAVFKSVTKTMPESNIHRGDDEIGGCQNHSYYHNVYGMLMARSTYEGMKLADK…	5	27492966	27507205	1	aKN0AAI2DD02FM1_c							Cs3g09770.1	76.4
CitXYL7	Ciclev10000404m	ATGCCACCAAAATGGTCCTTAGGCTACCACCAATGTCGCTGGAGCTATGATTCTGATAAGAGAGTTCGTGAGATTTGCAGGACATTTCGTGAGAAAGGTATACCCTGTGATGTTATATGGATGGATATTGACTACATGGATGGATTTCGTTGTTTCACTTTTGACAAGGCATATCCGAAATCTTTGGCAGCGGATCTCCACCTTAATGGTTTCAAAGCAATCTGGATGCTTGATCCAGGAATTAAACATGAAGATGGTTATTTTGTGTATGATAGCGGCTCTAAAATTGACGTGTGGATTCAGAAAGCAGATGGGACGCCTTTTATTGGGGAGGTGTGGCCTGGGCCTTGTGTTTTCCCTGATTATACACAATCAAAAGTTCGTTCCTGGTGGGGCTCT…	MPPKWSLGYHQCRWSYDSDKRVREICRTFREKGIPCDVIWMDIDYMDGFRCFTFDKAYPKSLAADLHLNGFKAIWMLDPGIKHEDGYFVYDSGSKIDVWIQKADGTPFIGEVWPGPCVFPDYTQSKVRSWWGSLVKDFIYNGVDGIWNDMNEPAVFKSVTKTMPESNIHRGDDEIGGCQNHSYYHNGLSGQPFSGPDIGGFDGNATPRLFGRWMGIGAMFPFCRGHTESDAIDHEPWSFGEECEEVCRLALKRRYRLLLHIYTLFYMAHTTGTLVASPTFFADPEDLTLRKLENSFLLGPVLVCASTLPDQRSDKLQHALPKGIWQSFDFEDSHPDLPFLYLRGGSILPLGPPHQHVGESKRSDDLTLLVALDENGKAKGVLFEDDGDGYGFTEGQYLL…	5	27526157	27537297	1	aC08018A05SK_c							Cs3g09730.1	83.1
CitXYL8	Ciclev10013535m	ATGCCACCAAAATGGTCCTTAGGTTACCACCAATGTCGCTGGAGCTATGATTCTGATAAGAGAGTTCATGAGGAGCATTTCCCAGATCCAAAATCATTGGCAACGGATCTCCACCTTAATGGTTTCAAAGCAATCTGGATGCTTGATCCAGGAATTAAACATGAAGATGGTTATTTTGTGTATGATAGCGGCCCTAAAATTGATTCTGTAACAAAGACAATGCCTGAGAGGAACATCCACAGAGGACTTGATGAAATTGGAGGTTGTCAAAATCACTTGTCCTATCACAACGTTTATGGCATGCCAATGGCACGATCGACATATGAAGGCATGAGGTTAGCTGATAAAGATAAGTGTCCTTTTGTTCTCACCAGAGCTGGAGTTATTGGTAGTCAAAGA…	MPPKWSLGYHQCRWSYDSDKRVHEEHFPDPKSLATDLHLNGFKAIWMLDPGIKHEDGYFVYDSGPKIDSVTKTMPERNIHRGLDEIGGCQNHLSYHNVYGMPMARSTYEGMRLADKDKCPFVLTRAGVIGSQRYAATWTGDNVSNWEHLHMSISMVLQLGLSGQPHSGPDIGGFAGNATPRLFGRWMGIRAVFPFCRGHSETNTIDHEPRSFGEEVLFCFSIVIITFFCFKLE*	6	5952967	5956362	1	aIC0AAA51CC11RM1_c|FGENESH	ATGGCGGCGGAGGCGATCGCTTCGTCGGACATGGTTTCAGGAAGGTGTTTCCGGTTCGATTGTGCGGCGAGTGATCGTCAAGCAGCGTATCCGAGTCTCTCGTTTGTGAATGGAAAGGATAGGGACACGCCAGTCTCGACTCACATGCGCCCTTTATATACTCCCATTTATCGATGCGTCCACGGTCAACAGATTGTCAAACTTGAGTTTCCTGCTGGTACGTCGTTGTATGGAACTGGGGAAGTTAGTGGTCAGCTAGAGCGGACGGGAAAGAGAATTTTTACATGGAACACGGACTCGTGGGGCTATGGTACCGGAACAACATCCTTGTATCAGTCACATCCTTGGGTGCTTGCTGTACTTCCGAGTGGAGAGGCGCTGGGGGTTCTTGCTGACACA…	MAAEAIASSDMVSGRCFRFDCAASDRQAAYPSLSFVNGKDRDTPVSTHMRPLYTPIYRCVHGQQIVKLEFPAGTSLYGTGEVSGQLERTGKRIFTWNTDSWGYGTGTTSLYQSHPWVLAVLPSGEALGVLADTTRRCEGFLVNLILFKYYCWIDLGKESTIQFIAPSSYPVITFGLFTSPTAVLVSLSHAVGTVFMPPKWSLGYHQCRWSYDSDKRVHEEHFPDPKSLATDLHLNGFKAIWMLDPGIKHEDGYFVYDSGPKIDVWIRKPDGTPFIGVKVTNVFISGEVWPGPCAFPDYTQSKVRSWWASLVRDFVYNGVDGIWNDMNEPAAFKAILKFIPMHMHSFYLYVVYGMPMARSTYEGMRLADKDKCPFVLTRAGVIGSQRYAATWTGDNVSNW…	6	5950303	5958391	1	orange1.1t02393.1	45.8
GH35s β-galactosidases
CitBGAL1	Ciclev10007531m	ATGGGGGAAAAACAAGTATTAGTAAAGTGGAAAATGTTGGGAGCCAATGCGAAAGTGTTGATGTTAGTGCTACTGTCGTTTTGCTCCTGGGAAATTTCTTTTGTTAAAGCCTCTGTTTCTTATGACCATAAAGCTGTTATTATTAATGGCCAGAAAAGGATTCTCATTTCTGGCTCCATTCATTATCCCAGAAGCACTCCCGAGATGTGGCCTGACCTTATACAAAAGGCCAAAGATGGAGGTTTGGATGTTATTCAAACTTATGTCTTTTGGAATGGACACGAGCCTACTCAAGGAAATTATTATTTTCAGGACAGGTATGATCTTGTTCGATTCATCAAGCTGGTGCAGCAAGCAGGGCTTTATGTTCATCTCCGGATTGGCCCTTATGTTTGTGCT…	MGEKQVLVKWKMLGANAKVLMLVLLSFCSWEISFVKASVSYDHKAVIINGQKRILISGSIHYPRSTPEMWPDLIQKAKDGGLDVIQTYVFWNGHEPTQGNYYFQDRYDLVRFIKLVQQAGLYVHLRIGPYVCAEWNYGGFPVWLKYVPGIEFRTDNGPFKAAMHKFTEKIVSMMKAEKLFQTQGGPIILSQIENEFGPVEWDIGAPGKAYAKWAAQMAVGLNTGVPWVMCKQDDAPDPVINTCNGFYCEKFVPNQNYKPKMWTEAWTGWFTEFGSAVPTRPAEDLVFSVARFIQSGGSFINYYMYHGGTNFGRTSGGFVATSYDYDAPIDEYGLLNEPKWGHLRDLHKAIKLCEPALVSVDPTVKSLGKNQEAHVFNSKSGKCAAFLANYDTTFSAKVS…	1	9428841	9434694	1	aCL1378Contig1							Cs4g14090.3	99.9
CitBGAL2	Ciclev10010258m	ATGTTGAGCCCAGCAGCAGCCAAGGTCTTCTCATTGCTGTTGTTGTTTATTTCCTCGTGGGAAATTTGTTCCGTCAAATCCACCGTCACATATGACAGAAAAGGTCTTATTATTAATGGCCAGAGAAGGATTCTCTTCTCTGGCTCCATTCATTATCCTAGAAGCACTCCTGAGATGTGGCCTGATCTGTTAAAGAAAGCCAAAGATGGAGGTTTGGATATCGTAGACACTTATGTCTTCTGGAATGGACATGAGCCTACTCGTGGAAAGTTTTATTTTGAGGGCAGATATGATCTTGTTCGGTTCATCAAGCTGGCGCAACAAGCTGGTCTCTATGTTACGCTCAGGATTGGTCCCTATGCTTGTGCTGAATGGAATTTTGGTGCATTTCCTGCTTGG…	MLSPAAAKVFSLLLLFISSWEICSVKSTVTYDRKGLIINGQRRILFSGSIHYPRSTPEMWPDLLKKAKDGGLDIVDTYVFWNGHEPTRGKFYFEGRYDLVRFIKLAQQAGLYVTLRIGPYACAEWNFGAFPAWLKFIPGMEFRIDNQPFELEMQKWVTKIVDMLKAEKLFETQGGPIILSQIENEFELVEWNLGDRARVYGQWAAHMAIGLNITVPWIMCKQANAPDPIIDTCNDFYCDWFSPNKDYKPKMWTENWTAWVQQFGTPPLYRPHEDLAYSVLKFIQTGGSMNNYYMYHGGTNFDRTNGAFVATSYDYDGVIDEYGLPSEPKWGHLSELHKVIKTCEPTILNSEPTVIPLGPHQEARVFNPPTGGCVAFLSNHDPNLPVNLTFWNLQYELPP…	1	9437873	9442295	1	FGENESH|C. sinensis	ATGTTGAGCCCAGCAGCAGCCAAGGTCTTCTCATTGCTGTTGTTGTTTATTTCCTCGTGGGAAATTTGTTCCGTCAAATCCACCGTCACATATGACAGAAAAGGTCTTATTATTAATGGCCAGAGAAGGATTCTCTTCTCTGGCTCCATTCATTATCCTAGAAGCACTCCTGAGATGTGGCCTGATCTGTTAAAGAAAGCCAAAGATGGAGGTTTGGATATCGTAGACACTTATGTCTTCTGGAATGGACATGAGCCTACTCGTGGAAAGTTTTATTTTGAGGGCAGATATGATCTTGTTCGGTTCATCAAGCTGGCGCAACAAGCTGGTCTCTATGTTACGCTCAGGATTGGTCCCTATGCTTGTGCTGAATGGAATTTTGGTGCATTTCCTGCTTGG…	MLSPAAAKVFSLLLLFISSWEICSVKSTVTYDRKGLIINGQRRILFSGSIHYPRSTPEMWPDLLKKAKDGGLDIVDTYVFWNGHEPTRGKFYFEGRYDLVRFIKLAQQAGLYVTLRIGPYACAEWNFGAFPAWLKFIPGMEFRIDNQPFELEMQKWVTKIVDMLKAEKLFETQGGPIILSQIENEFELVEWNLGDRARVYGQWAAHMAIGLNITVPWIMCKQANAPDPIIDTCNDFYCDWFSPNKDYKPKMWTENWTAWVQQFGTPPLYRPHEDLAYSVLKFIQTGGSMNNYYMYHGGTNFDRTNGAFVATSYDYDGVIDEYGLPSEPKWGHLSELHKVIKTCEPTILNSEPTVIPLGPHQEARVFNPPTGGCVAFLSNHDPNLPVNLTFWNLQYELPP…	1	9437873	9442360	1	Cs4g14100.1	98.8
CitBGAL3	Ciclev10010454m	ATGGCCACTCTAAAGCATTGCTCTCGAGCCATTCTTTTGTGCTTAATTCTTCAAACCCTTTTCAATCTGTCCCTTGCTTATCGCGTTTCACATGATGGAAGGGCGATCACCATTGATGGTGAACGTAAAATTCTGCTCTCTGGTTCCATTCATTACCCTAGAAGTACCCCAGGAATGTGGCCAGACTTGATTAAGAAAGCTAAGGAGGGTGGCTTGGATGCTATAGAGACATACGTCTTTTGGAATGCCCACGAACCATTACGTCGCCAGTATGATTTTACTGGCAATCTTGATCTTATAAGGTTCATTAAAACTATTCAAGATCAAGGATTGTACGTCATTCTTCGCATTGGTCCCTATGTTTGTGCCGAATGGAACTATGGAGGATTCCCAGTTTGG…	MATLKHCSRAILLCLILQTLFNLSLAYRVSHDGRAITIDGERKILLSGSIHYPRSTPGMWPDLIKKAKEGGLDAIETYVFWNAHEPLRRQYDFTGNLDLIRFIKTIQDQGLYVILRIGPYVCAEWNYGGFPVWLHNMPGIEELRTTNKVFMNEMQNFTTLIVDMAKKEKLFASQGGPIILAQIENEYGNVMSDYGDAGKSYINWCAKMATSLDIGVPWIMCQESDAPSPMINTCNGFYCDQFTPNNPNSPKIWTENWTGWFKSWGGKDPKRTAEDLAFAVARFFQFGGTVQNYYMYHGGTNFGRTSGGPYLTTSYDYDAPIDEYGHLNQPKWGHLRELHKLLKSMEKTLTHGNVTNTDYGNSVSATVYATEEGSSCFLANENQSEDSTITFQGSSYNLP…	1	24642845	24646674	1								Cs4g07090.1	99
CitBGAL4	Ciclev10010541m	ATGGCTTCTTCTGGGACCCAATTTGTCCTCGTTGCGAGTTTGGCTTTGTTGTGTTCGTGCTTAGCAATCAAGGTTGAATATGATGCAAATGCCATTATCATTGATGGGAAACGTAAAGTCATCATCGCTGGTTCAATCCATTACCCCCGCAGCACCCCTGAGATGTGGCCAGATTTGATTCGGAAGGCAAAGGAGGGAGGGGTTGATGCGATTGAAACATACATCTTCTGGGATGTCCATGAGCCTCAGCGTCGCAAGTATGATTTCTCTGGAAATCTGGACTTCGTGAAGTTCTTCAAGCTTGTCCAAGACGCTGGACTTTATGCCATTATTCGGATTGGCCCATACGTCTGTGCAGAATGGAATTATGGAGGATTCCCAATGTGGCTGCACAATACT…	MASSGTQFVLVASLALLCSCLAIKVEYDANAIIIDGKRKVIIAGSIHYPRSTPEMWPDLIRKAKEGGVDAIETYIFWDVHEPQRRKYDFSGNLDFVKFFKLVQDAGLYAIIRIGPYVCAEWNYGGFPMWLHNTPGIQLRTNNDIFKNEMQVFTTKIVNMCKEANLFASQGGPIILAQIENEYGNIMEKYGDAGKKYIKWCANMAVAQNISEPWIMCQQNDAPEPMINTCNGFYCDQFKPNNPKSPKMWTENWTGWFKLWGGRDPQRTAEDLAFSVARFFQSGGVLNNYYMYHGGTNFGRTAGGPYIATSYDYNAPLDEYGNLNQPKWGHLKQLHEAIKEAEKFFTGGIVETKNISTYVNLTQFTVNATGERFCMLSNGDNTGDYTADLGPDGKFFVPAW…	1	24648011	24652238	1								Cs4g07080.1	98.6
CitBGAL5	Ciclev10010771m	ATGGCTTCTTCTCGGACAGAATTTGTTCTTGTAGCCGGTTTGGCTATGCTGTGTTCATGCTTAGCAATCAAGGTTGAATATGATGCAAATGCCCTTATCATTGATGGGCAGCGTAAAGTCATCATCTCTGGCTCAATCCATTATCCCCGCAGCACCCCTGAGATGTGGCCTGATCTGATTCAGAAGGCAAAGGATGGAGGGCTTGATGCTATTGAAACGTATATCTTCTGGAATGTCCACGAGCCTCGGCGTCGCGAGTATGACTTTTCTGGAAATCTGGACTTCGTCAAGTTCTTCAAGCTAGTTCAAGATGCTGGACTATATGCCATTCTTCGAATTGGCCCATACGTCTGTGCTGAATGGAATTATGGAGGATTCCCCATGTGGCTGCACAATACT…	MASSRTEFVLVAGLAMLCSCLAIKVEYDANALIIDGQRKVIISGSIHYPRSTPEMWPDLIQKAKDGGLDAIETYIFWNVHEPRRREYDFSGNLDFVKFFKLVQDAGLYAILRIGPYVCAEWNYGGFPMWLHNTPGIQLRTDNDIFKNEMQVFTTKIVNMCKEANLFASQGGPIILAQIENEYGNIMEKYGDAGKQYIKWCANMAVAQNISEPWIMCQQSDAPEPMINTCNGFYCDQFKPNNPKSPKMWTENWTGWFKLWGGRDPQRTAEDLAFSVARFFQNGGVLNNYYMYHGGTNFGRTAGGPYIATSYDYNAPLDEYGNLNQPKWGHLKQLHASIKQAEKFLTNGTVETKSVMNFVDLTKFTLNATGERFCMLSNSDNTGDYTADLGEDGKFFVPAW…	1	24654486	24658616	1								Cs4g07070.1	99
CitBGAL6	Ciclev10017808m	ATGATGATGGTGATTCAAACTGTGTCTCTCGTGACTGACTCTTCGGGACTCTCAGCTAATGTGACGTATGATCACAGAGCGCTTGTTATTGATGGAAAGAGGCGGGTTTTGCAGTCAGGTTCTATTCATTATCCTCGAAGCACTCCCGAGGTGTGGCCAGAACTTATTAGGAAATCAAAGGAAGGGGGACTGGAAGTGATCGAGACGTACGTTTTCTGGAATTATCATGAGCCTATAAGAGGACAGTATTATTTTGAAGGAAGGTTTGATCTTGTGAGGTTTGTGAAAACGGTTCAGGAAGCTGGCCTTTTTCTTCATTTGAGGATCGGCCCATATGCCTGCGCTGAATGGAACTATGGGGGATTCCCTGTTTGGTTACATTTCATTCCTGGGATTCAG…	MMMVIQTVSLVTDSSGLSANVTYDHRALVIDGKRRVLQSGSIHYPRSTPEVWPELIRKSKEGGLEVIETYVFWNYHEPIRGQYYFEGRFDLVRFVKTVQEAGLFLHLRIGPYACAEWNYGGFPVWLHFIPGIQFRTTNNPFKEEMKRFLAKIVDLMKQENLFASQGGPIILAQVENEYGNVEWAYGVGGELYVKWAADTAVNLNTSVPWVMCQQEDAPDPIINTCNGFYCDGFTPNSPSKPIMWTENYSGWFLSFGYAVPFRPVEDLAFAVARFFETGGTFQNYYMYFGGTNFGRTAGGPLVATSYDYDAPIDEYGFIRQPKWGHLRELHKAIKLCEEYLISSDPTHQKLGANLEAHIYYKSSNDCAAFLANYDSSSDANVTFNGNVYFLPAWSVSILP…	2	32951406	32957830	1								Cs2g06700.1	90.6
CitBGAL7	Ciclev10023501m	ATGAGTGGTGGCGTTCGCGGCGGAGAAGTGACGTACGACGGCCGATCTTTGATCATTAATGGTGAAAGAAAGGTTCTTTTCTCTGGTTCAATTCACTATCCGCGGAGCCCTCGAGAGATGTGGCCATCCTTGATAAGCAAGGCCAAAGAAGGAGGATTGGATGTGATACAAACCTATGTGTTCTGGAATCTTCATGAGCCAGAAACAGGCAAGTATGATTTTAGTGGAAGAAGAGATCTAGTAAGGTTCATTAAAGAAATCCAAGCACTAGGATTATATGCCAGCATTAGGATTGGACCTTTCATTCAGAGCGAATGGTCTTATGGAGGCCTCCCATTTTGGCTGCATGACGTTCCAGGCATTACTTTTAGATGTGACAATGAACCCTTCAAGGCTTTC…	MSGGVRGGEVTYDGRSLIINGERKVLFSGSIHYPRSPREMWPSLISKAKEGGLDVIQTYVFWNLHEPETGKYDFSGRRDLVRFIKEIQALGLYASIRIGPFIQSEWSYGGLPFWLHDVPGITFRCDNEPFKAFMQNFTTKIVNMMKSERLYASQGGPIILSQIENEYQMVENAFGERGPPYIKWAAEMAVGLQTGVPWVMCKQDDAPDPVINACNGRKCGETFKGPNSPNKPSIWTENWTSRYQAYGEDPIGRTADDIAFHVALWVARNGSFVNYYMYHGGTNFGREASAFVTASYYDDAPLDEYGMINQPKWGHLKELHAAIKLCSNTLLLGKAMTPLQLGPKQEAYLFAENSSEECASAFLVNKDKQNVDVVFQNSSYKLLANSISILPDCRNVIFN…	3	19286089	19293764	-1	FGENESH|C. sinensis	ATGGTGAGGCTACTGATATTGTGTTGGGTTTTGCTGCCGCTGCTGGCGGTAATGAGTGGTGGCGTTCGCGGCGGAGAAGTGACGTACGACGGCCGATCTTTGATCATTAATGGTGAAAGAAAGGTTCTTTTCTCTGGTTCAATTCACTATCCGCGGAGCCCTCGAGAGATGTGGCCATCCTTGATAAGCAAGGCCAAAGAAGGAGGATTGGATGTGATACAAACCTATGTGTTCTGGAATCTTCATGAGCCAGAAACAGGCAAGTATGATTTTAGTGGAAGAAGAGATCTAGTAAGGTTCATTAAAGAAATCCAAGCACTAGGATTATATGCCAGCATTAGGATTGGACCTTTCATTCAGAGCGAATGGTCTTATGGAGGCCTCCCATTTTGGCTGCAT…	MVRLLILCWVLLPLLAVMSGGVRGGEVTYDGRSLIINGERKVLFSGSIHYPRSPREMWPSLISKAKEGGLDVIQTYVFWNLHEPETGKYDFSGRRDLVRFIKEIQALGLYASIRIGPFIQSEWSYGGLPFWLHDVPGITFRCDNEPFKAFMQNFTTKIVNMMKSERLYASQGGPIILSQIENEYQMVENAFGERGPPYIKWAAEMAVGLQTGVPWVMCKQDDAPDPVINACNGRKCGETFKGPNSPNKPSIWTENWTSRYQAYGEDPIGRTADDIAFHVALWVARNGSFVNYYMYHGGTNFGREASAFVTASYYDDAPLDEYGMINQPKWGHLKELHAAIKLCSNTLLLGKAMTPLQLGPKQEAYLFAENSSEECASAFLVNKDKQNVDVVFQNSSYKL…	3	19286089	19293815	-1	Cs5g17540.1	97.8
CitBGAL8	Ciclev10018839m	ATGAAGCGAATGAAAATATTACCGGTTAGGCTAATCGTTTTGTTCATCTTCTTCTCCTTCTGCTGCTTCAACTCATTTTGCTTAGCAGCAAATGTAACGTACGATCATCGCTCTTTAATCATTGATGGCCGGCGAAAGCTTTTCCTTTCTGCTTCCATTCATTATCCTCGCAGTGTTCCTGCAATGTGGCCGGAGCTTATTCAAGCAGCAAAAGAAGGTGGCTTAAATACGATTGAATCCTATGTGTTTTGGAGTGGTCATGAGCTTTCTCCAGGCAAATACTCGTTCGAGGGAAGATATGATCTGGTCAAGTTTGTGAAGACTGTTCAGCAAGCTGGGATGTATATGCTTCTGCGTATTGGTCCATTTGTTGCTGCTGAGTACAATTATGGAGGCGTA…	MKRMKILPVRLIVLFIFFSFCCFNSFCLAANVTYDHRSLIIDGRRKLFLSASIHYPRSVPAMWPELIQAAKEGGLNTIESYVFWSGHELSPGKYSFEGRYDLVKFVKTVQQAGMYMLLRIGPFVAAEYNYGGVPVWLHYIPGSVFRSYSKPFMSYMQKFMTLIVDMMKKEKLFASQGGPIILAQVENEYQWYEQFYKGGKEYAMWAASMAVSQNTGVPWIMCQQYDAPDPVIDTCNSFYCDQFTPHSSKMPKIWTENWPGWFKKFGAPDPHRPHQDVAFSVARFIQKGGSVHNYYMYHGGTNFGRTSGDFVTTSYDYDAPIDEYGLPRNPKWGHLKELHEAIMLCEGVLLNSDPINLSLGPSQEADVYADSSGACAAFLSNTDNATDTTVVFRNVSYFL…	3	37156878	37163307	1								Cs5g23686.1	49.3
CitBGAL9	Ciclev10000420m	ATGGCGTCCTGTTATTGGGTTGCAATATTAGTGATAATAATAGGAGAAGCAGGCTGCTTTGTTGAAGGAGGAAATGTGACATACGATGGAAGATCCCTCATCATTGATGGTCAGAGAAAAATTCTATTCTCTGGTTCTATCCACTATCCTCGCAGCACCCCTCAGATGTGGCCGTCATTGATAGCCAAAGCCAAAGAGGGAGGCCTACACGTTATTCAGACTTATGTCTTTTGGAACCTTCACGAGCCTCAGCCTGGCGAGTATGACTTCGGGGGAAGATATGACTTGGTGAAATTCATCAAGGAAATTCAAGCACAAGGCCTTTATGCTTGTCTTACAATTGGACCCTTCATTGAGAGCGAATGGACTTATGGGGGATTTCCTTTTTGGTTGCATGAT…	MASCYWVAILVIIIGEAGCFVEGGNVTYDGRSLIIDGQRKILFSGSIHYPRSTPQMWPSLIAKAKEGGLHVIQTYVFWNLHEPQPGEYDFGGRYDLVKFIKEIQAQGLYACLTIGPFIESEWTYGGFPFWLHDVPNIVYRTDNEPFKFYMQNFTTKIVNLMKSSGLYASQGGPIILSQIENEYQNIEKAFGEAGPSYVRWAAKMAVELETGVPWVMCKQTDAPDPVINTCNGMRCGQTFSGPNSPNKPSMWTENWTSFYQVYGGEPYIRSAEDIAFHVTLFIAKNGSYINYYMYHGGTNFGRTASAYIITSYYDQAPLDEYGLTRQPKWGHLKELHGAINSCSETLLQGNPSNFSLGQLQEAYVFEEEAGGGCVAFLINNDGRDDNATVQFRNMSFQLP…	5	15801849	15810954	1								Cs1g08390.1	96.4
CitBGAL10	Ciclev10000393m	ATGAAGCCAAGAACACCCATTGCGCCTTTCGCTTTGTTAATTGTTTTCTCCAGTTCGATCACATATTGTTTTGCGGGAAATGTAACTTACGATAGCCGCTCTTTGATCATCAATGGTCGCCGAGAGCTTATTATTTCTGCCGCCATTCATTATCCTCGCAGTGTTCCTGGGATGTGGCCGGGGCTGGTTCAACAGGCAAAGGAAGGAGGCGTCAATACGATTGAGTCGTATGTTTTTTGGAATGGTCATGAACTTTCTCCAGGCAAATATTATTTCGGAGGAAGATTTAATCTGGTCAAGTTTATTAAGATTATTCAGCAGGCCAGGATGTATATGATCTTGCGAATTGGCCCATTTGTTGCAGCTGAGTATAACTATGGTGGGATACCAGTTTGGTTG…	MKPRTPIAPFALLIVFSSSITYCFAGNVTYDSRSLIINGRRELIISAAIHYPRSVPGMWPGLVQQAKEGGVNTIESYVFWNGHELSPGKYYFGGRFNLVKFIKIIQQARMYMILRIGPFVAAEYNYGGIPVWLHYIPGTVFRNDTEPFKYHMQKFMTLIVDMMKREKLFASQGGPIILAQVENEYGYYESFYGEGGKRYALWAAKMAVAQNIGVPWIMCQQFDTPDPVINTCNSFYCDQFTPHSPSMPKIWTENWPGWFKTFGGRDPHRPSEDIAFSVARFFQKGGSVHNYYMYHGGTNFGRTAGGPFITTSYDYEAPIDEYGLPRNPKWGHLKELHGAIKLCEHALLNGERSNLSLGSSQEADVYADSSGACAAFLANMDDKNDKTVVFRNVSYHLPA…	5	15822060	15834446	1								Cs1g08380.1	99.7
CitBGAL11	Ciclev10001020m	ATGTGTCAGCAGAGTGGCGCTCCACAGCCCATGATAAATACATGCAATGGGTTTTATTGCGATGAGTTCGTTCCAAATAATCCAAAGAGCCCAAAAATGTGGACCGAAAATTGGACCGGGTGGTTCAAGAAATGGGGCGATAAAGACCCTCATAGGACTCCACAGGACGTGAGCTTTGCTGTCGCCCGATTCTTTCAAGCTGGAGGGGTCTTACAAAATTATTACATGTATCATGGAGGCACCAACTTCGGCCGGGATGCTGGAGGTCCATTTATTATAACATCTTATGATTACGATGCTCCACTCGATGAATACGGGAATTTAAATCAGCCGAAATGGGGACATTTGAAGCAACTCCATGAAGCAATCAAACTTGGAGAGAAGATTCTCACAAGTGGC…	MCQQSGAPQPMINTCNGFYCDEFVPNNPKSPKMWTENWTGWFKKWGDKDPHRTPQDVSFAVARFFQAGGVLQNYYMYHGGTNFGRDAGGPFIITSYDYDAPLDEYGNLNQPKWGHLKQLHEAIKLGEKILTSGNVTTKQFGNGVNLTTYSNTTSGERFCFLSNTNTSQDANVDLQQDGKYFVPAWSVSILHGCNKEVYNTAKVNTETTVMVKKPIELGTKLSWMWAQETIRDTLHGKGRFNATKLIEQKEATSDESDYLWYMTSIENMGKSSHNATLYVKSSGQVLHAYVNSKHIGSQFGYDFEFKQPAILRPGKNFLTLLSATVGLQNYGEFFDLGPEGLAGGPVELNVDGMASLNLSSNIWNYKVGLNGEAKRLYDPNSPHAHIWKTSKKLPIGKPM…	5	24748816	24753902	1	aIC0AAA5CC09RM1_c|aCL4534Contig1	ATGTCATCAAGTTATTGGACTGAGATTCTTCTTATTCTAAATTTAAGTTTCGTTTGCTTGTTATCATCAGCAACACAAGTTGATTATGATGCAAATGCCATTATAATTAATGGAGAACGGCGAGTTATCTTCTCTGGTGCAATTCACTATCCTCGAAGCACTCCACAAATGTGGCCAGATCTTATACGAAAGGCAAAGGATGGAGGGCTAGATGCAATTGAAACTTATATTTTTTGGAATGCTCATGAGCCTCAGCGTCATCAGTACGATTTCTCAGGAAATTTGGATTTCATCAAGTTTTTCAAGCTAGTTCAAGAAGTAGGATTATATGCCATTATACGAATTGGTCCATATGTCTGTTCTGAATGGAATTATGGGGGCTTTCCCGTGTGGCTACAT…	MSSSYWTEILLILNLSFVCLLSSATQVDYDANAIIINGERRVIFSGAIHYPRSTPQMWPDLIRKAKDGGLDAIETYIFWNAHEPQRHQYDFSGNLDFIKFFKLVQEVGLYAIIRIGPYVCSEWNYGGFPVWLHNIPGIQLRTNNDIYKNEMQNFTTKIVNMCKEANLFAPQGGPIILAQIENEYGNIMGPYKEAGKSYINWCAQMATSQNIGVPWIMCQQSDAPQPMINTCNGFYCDEFVPNNPKSPKMWTENWTGWFKKWGDKDPHRTPQDVSFAVARFFQAGGVLQNYYMYHGGTNFRRDAGGPFIITSYDYDAPLDEYGNLNQPKWGHLKQLHEAIKLGEKLLTSGNVTTKQFGNGVNLTTYSNTTSGERFCFLSNTNTSQDANVDLQQDGKYSVP…	5	24748839	24754096	1	orange1.1t03117.1	69.5
CitBGAL12	Ciclev10004034m	ATGGGTCAGTACCAGTTGTTGTGCTTGTTTGGTTTGTTATTGACAACAATCGGCGGCTCTGATGGCGGCGGCGGCGGCAACAACGTAACATATGACGGCAGATCTTTAATCATCAACGGCCATCGTAAAATTCTCTTCTCCGGCTCTATTCATTATCCTCGCAGCACTCCTCAGATGTGGCCACGGTTAATAGCCAAAGCTAAAGAAGGAGGATTAGACGTGGTACAAACCTTAGTTTTCTGGAACCTCCATGAGCCACAACCAGGACAGTTTGATTTTAGCGGAAGACGCGATTTGGTAAGGTTCATCAAGGAAGTTCAAGCTCAGGGCTTGTATGTTTGCCTCAGAATTGGACCCTTCATCGAGGGTGAATGGGGTTACGGGGGTCTTCCGTTTTGG…	MGQYQLLCLFGLLLTTIGGSDGGGGGNNVTYDGRSLIINGHRKILFSGSIHYPRSTPQMWPRLIAKAKEGGLDVVQTLVFWNLHEPQPGQFDFSGRRDLVRFIKEVQAQGLYVCLRIGPFIEGEWGYGGLPFWLHDVPGIVFRSDNEPFKFHMKRYATMIVNMMKAARLYASQGGPIILSQIENEYGMVEHSFLEKGPPYVRWAAKLAVDLQTGVPWVMCKQDDAPDPVINACNGRQCGETFAGPNSPDKPAIWTENWTSFYQVYGDEARIRSAEDIAYHVALFIAKMKGSYVNYYMYHGGTNFGRTASAYVLTGYYDQAPLDEYGLLRQPKWGHLKELHSAVKLCLKPMLSGVLVSMNFSTLQEAFIFQGSSECAAFLVNKDKRNNATVYFSNLMYEL…	5	37609414	37614258	1								Cs3g19920.1	99
CitBGAL13	Ciclev10003478m	ATGGAGAGTGAATCAGCGGTGTACGGCCGTGGACACCGGCATGAACATCATGATGATCGTGATCATCGGAATGTTACTTACGATGGAAGATCTTTAATCATCAATGGTCACCGCAAAATTCTCTTCTCCGGCTCCATTCATTATCCTCGTAGCACCCCCCAGATGTGGCCGTCTTTGATAGCCAAAGCAAAAGAAGGAGGCTTAGACGTAATCCAGACGTACGTTTTTTGGAACCTCCATGAACCCCAAAAAGGACAGTATGACTTCAGTGGAAGAAACGACATCATTCGGTTCATTAAAGAAATACAATCCCAAGGCCTTTACGTTTGCCTCAGGATTGGTCCTTTCATTGAGAGCGAATGGACTTATGGGGGTCTGCCAATTTGGTTGCATGATGTT…	MESESAVYGRGHRHEHHDDRDHRNVTYDGRSLIINGHRKILFSGSIHYPRSTPQMWPSLIAKAKEGGLDVIQTYVFWNLHEPQKGQYDFSGRNDIIRFIKEIQSQGLYVCLRIGPFIESEWTYGGLPIWLHDVAGIVFRSDNKPYKIVNMMKSEKLYASQGGPIILSQIENEYQTIEPAFHEKGPPYVLWAAKMAVDLHTGVPWVMCKQDDAPGPVINACNGMRCGETFKGPNSPNKPSIWTEDWTSFYQVWGGKPYIRSAQDIAFHVALFIAKNGSYVNYYMYHGGTNFGRTAAAFMITGYYDQAPLDEYGLVREPKWGHLKELHAAIKLCSRPLLTGTQNVIPLGQLQEAYVFEETSGVCAAFLVNNDERKAVTVLFRNISYELPRKSISILPDCKT…	5	37616213	37622284	1								Cs3g19930.1	76.2
CitBGAL14	Ciclev10000260m	ATGGAAACTAGCTCAGTTTCCAAGCTACTCACATGGCTCTGGATGGCATTGTTACTGGGCACTGAACTGATTCAGTGCAGCACTGTAACATACGATAGGAAGGCCATTCTCATCAATGGCCAAAGGAGAATCCTCATCTCCGGTTCCATTCACTATCCCAGAAGCACCCCTGAGATGTGGGAAGATCTTATAAGGAAGGCTAAAGATGGAGGCTTAGATGTTATTGACACCTATGTTTTTTGGAATGGTCACGAACCTTCTCCTGGCCATTATAATTTCGAGGGGAGTTACGACTTGGTGCGGTTCATTAAGACCGTACAGAGAGTAGGGCTGTATGCACATCTCCGCATTGGACCCTATGTTTGTGCTGAGTGGAATTTCGGAGGATTTCCTGTTTGG…	METSSVSKLLTWLWMALLLGTELIQCSTVTYDRKAILINGQRRILISGSIHYPRSTPEMWEDLIRKAKDGGLDVIDTYVFWNGHEPSPGHYNFEGSYDLVRFIKTVQRVGLYAHLRIGPYVCAEWNFGGFPVWLKYVPGISFRTDNGPFKVAMQGFTQKIVQMMKNEKLFASQGGPIILSQIENEYGPESKSLGAAGHAYVNWAAKMAVGLDTGVPWVMCKEDDAPDPVINSCNGFYCDAFSPNKPYKPTLWTEAWSGWFTEFGGAVHRRPVQDLAFAVARFIQKGGSFFNYYMYHGGTNFGRTAGGPFITTSYDYDAPLDEYGLMRQPKYGHLKQLHEAIKLCEYALVSSDPTVTSLGTYQQAHVFSAGQQKCAAFLSNYNTKSAARVTFNGRHYNLP…	5	41432162	41438466	1	aC01015E12SK_c							Cs3g25410.1	99.3
CitBGAL15	Ciclev10026929m	ATGTCAGTACCAAGTCGAGTACTGCTGGCGGCACTTGTTTGCTTGTTGACGATTTCAACGGTTGTTCAAGGAGAGAAGTTTAAAAGGAGCGTGACATACGACGGTCGATCTTTGATCATCAATGGTAAAAGAGAGCTTTTCTTCTCAGGTTCAATCCATTACCCCAGGATGCCACCTGAGATGTGGTGGGACATACTGAAAAAGGCTAAAGCTGGAGGATTGAATGTGATTCAGACTTATGTTTTCTGGAACATTCATGAACCAGAGAAGGGCCAGTTCAATTTTGAAGGAAACTATAATTTGACCAAATTTATCAAGATGATTGGTGATCTGGGTATGTACGCAACACTTAGGGTCGGGCCATTCATTGAGGCGGAATGGAACTATGGTGGATTTCCA…	MSVPSRVLLAALVCLLTISTVVQGEKFKRSVTYDGRSLIINGKRELFFSGSIHYPRMPPEMWWDILKKAKAGGLNVIQTYVFWNIHEPEKGQFNFEGNYNLTKFIKMIGDLGMYATLRVGPFIEAEWNYGGFPFWLREVPNITFRSDNPPFKYHMKKFTKMIIDMMKDAQLYASQGGPIILSQVENEYNTIQLAFRELGTRYVHWAGTMAVRLNTGVPWVMCKQKDAPGPVINTCNGRNCGDTFTGPNKPSKPVLWTENWTARYRVFGDPPSRRSAQNLAFSVARFFSKNGTLANYYMYYGGTNYGRSGSSFVTTRYYDEAPIDEYGMLREPKWGHLRDLHSALRLCKKALLSGKPSVENFGPNLEAHIYEQPKTKACVAFLSNNDSRTPATLTFRGSK…	7	713306	717895	1								Cs1g25770.1	99.5
CitBGAL16	Ciclev10024881m	ATGGCAGCTTTATTTGTTTACAGGATGCTCATTGTGTTTTGCCTGAGCTTGTGCTTGTGTTGTCATCATATACATTGCAGTGTCACCTACGATAGAAAGGCTTTACTGATTAATGGGCAAAGAAGAATCCTTTTCTCTGGTTCTATCCATTACCCAAGAAGCACCCCTGACATGTGGGAAGATCTTATACAGAAGGCAAAAGATGGAGGTCTTGATGTGATTGAAACTTATGTTTTCTGGAATGTGCATGAGCCGTCTCCTGGAAATTATAATTTTGAAGGGAGATATGATCTGGTCAGATTCATCAAAACGATAAAAAAAGCTGGGCTTTATGCTCATCTTCGCATTGGACCTTATGTTTGTGCTGAATGGAATTTTGGAGGATTCCCTGTCTGGTTA…	MAALFVYRMLIVFCLSLCLCCHHIHCSVTYDRKALLINGQRRILFSGSIHYPRSTPDMWEDLIQKAKDGGLDVIETYVFWNVHEPSPGNYNFEGRYDLVRFIKTIKKAGLYAHLRIGPYVCAEWNFGGFPVWLKYVPGISFRTDNEPFKRAMQGFTEKIVNLMKSENLFESQGGPIILSQIENEYGAQSKQLGAAGHNYMTWAAKMAVEMGTGVPWVMCKEEDAPDPVINSCNGFYCDAFTPNQPYKPTIWTEAWSGWFTEFGGPIHQRPVQDLAFAAARFIQKGGSFINYYMYHGGTNFGRSAGGPFITTSYDYDAPIDEYGLIRQPKYGHLKELHRAIKMCERALVSADPIVTSLGGFQQAHVYSSESGDCAAFLSNYDTKSAARVLFNNMHYNLPP…	7	1613690	1620021	-1	aC31805H10EF_c|aCL7104Contig1							Cs1g24730.1	100
CitBGAL17	Ciclev10024886m	ATGGGCATGAACAAGCAGCTTGGAATGTGTAATGTGCTGTTCATTCTCTTGCTGGGTTGTTCGGGGCTTTTTGCTCCTGTTGAAGTTGAGGGCTCTGTGTCTTATGACTCTAAGGCTATCGCCATTAATGGCAAAAGAAGAATCCTTATCTCTGGATCCATTCACTATCCCAGAAGCTCTCCTGAGATGTGGCCAGATCTTATACAGAAAGCGAAAGATGGAGGCTTGGATGTGATACAGACATATGTATTTTGGAATGGCCATGAGCCTTCACCTGGAAAATATTATTTTGAGGGGAATTATGATCTGGTGAAGTTTATCAAGCTGGTTAAGCAAGCAGGCCTTTATGTTAATCTCAGGATTGGTCCTTACGTTTGTGCTGAGTGGAACTTTGGGGGT…	MGMNKQLGMCNVLFILLLGCSGLFAPVEVEGSVSYDSKAIAINGKRRILISGSIHYPRSSPEMWPDLIQKAKDGGLDVIQTYVFWNGHEPSPGKYYFEGNYDLVKFIKLVKQAGLYVNLRIGPYVCAEWNFGGFPVWLKYIPGINFRTNNGPFKAEMHKFTKKIVDMMKAERLFESQGGPIILSQIENEYGPMEYEIGAPGRSYTRWAAKMAVGLDTGVPWIMCKQDDAPDPLINTCNGFYCDYFSPNKAYKPKMWTEAWTGWYTEFGGPVPHRPVEDLAFSVAKFIQKGGSFINYYMYHGGTNFGRTAGGPFIATSYDYDAPLDEYGLLRQPKWGHLKDLHRAIKLCEPALVSGNPTVMPLGNYQEAHVFKSKSACAAFLANYNQRTFAKVAFGNQHY…	7	6510942	6517380	1								Cs1g18300.2	99.4
CitBGAL18	Ciclev10024990m	ATGCATAGTGAGAGAGAGAGTGAGAGTGACGGCACTACTAGTACAGCTACAACGAGAGGCCCAAGAGAGTCAACGACGACGATGACAGTCAAACGCGCGATGGCGACAATGCGAAGGCGGAGCACCGCCACCACCAATACGACGTTGTTCCTCACCGTTTTGATATCGCTCTTGGCCTTTCTTGGCTTCGTCCCTGTCTTCGCTCCCCTCCCTTCTCTCGCCTTCCGCAATCCTCCTCCTCCTCCTCACCACCGTCATCGCCACAATAACGTGAATGGTCGAAAGTTTGAGATTGAGGATGACATGTTCCGGAAAGATGGTGAGCCATTTCAGATTATTGGTGGTGACCTGCATTATTTCCGCATTCTCCCTCAGCACTGGGAAGATAGGCTTTTGCGA…	MHSERESESDGTTSTATTRGPRESTTTMTVKRAMATMRRRSTATTNTTLFLTVLISLLAFLGFVPVFAPLPSLAFRNPPPPPHHRHRHNNVNGRKFEIEDDMFRKDGEPFQIIGGDLHYFRILPQHWEDRLLRAKALGLNTIQTYVPWNLHEPKPGKLVFSGIADLVSFLKLCQKLDLLVMLRPGPYICAEWDLGGFPAWLLAKKPALKLRSSDRAYLQLVERWWGVLLPKIAPLLYDIGGPIVMVQIENEFGSYGDDKEYLHHLVTLARAHLGKDIILYTTDGGTRETLMKGTNRGDAVFAAVDFSTGDEPWPIFKLQKQFNAPGKSPPLSSEFYTGWLTHWGEKIAKTDADFTASYLEKILSQNGSAVLYMAHGGTNFGFYNGANTGNTESDYQPDL…	7	6595628	6602209	1	aCL1858Contig1	ATGGCGACAATGCGAAGGCGGAGCACCGCCACCACCAATACGACGTTGTTCCTCACCGTTTTGATATCGCTCTTGGCCTTTCTTGGCTTCGTCCCTGTCTTCGCTCCCCTCCCTTCTCTCGCCTTCCGCAATCCTCCTCCTCCTCCTCACCACCGTCATCGCCACAATAACGTGAATGGTCGAAAGTTTGAGATTGAGGATGACATGTTCCGGAAAGATGGTGAGCCATTTCAGATTATTGGTGGTGACCTGCATTATTTCCGCATTCTCCCTCAGCACTGGGAAGATAGGCTTTTGCGAGCAAAGGCTTTAGGCTTGAATACCATTCAAACTTATGTTCCTTGGAATCTGCATGAACCAAAACCTGGCAAGCTGGTTTTTAGTGGCATTGCAGATCTT…	MATMRRRSTATTNTTLFLTVLISLLAFLGFVPVFAPLPSLAFRNPPPPPHHRHRHNNVNGRKFEIEDDMFRKDGEPFQIIGGDLHYFRILPQHWEDRLLRAKALGLNTIQTYVPWNLHEPKPGKLVFSGIADLVSFLKLCQKLDLLVMLRPGPYICAEWDLGGFPAWLLAKKPALKLRSSDRAYLQLVERWWGVLLPKIAPLLYDIGGPIVMVQIENEFGSYGDDKEYLHHLVTLARAHLGKDIILYTTDGGTRETLMKGTNRGDAVFAAVDFSTGDEPWPIFKLQKQFNAPGKSPPLSSEFYTGWLTHWGEKIAKTDADFTASYLEKILSQNGSAVLYMAHGGTNFGFYNGANTGNTESDYQPDLTSYDYDAPIKESGDVDNPKFKAIRRVVEKFSPA…	7	6595628	6602209	1	Cs1g18190.1	95
CitBGAL19	Ciclev10030257m	ATGGCAGCTAGCTCCGGTTCCAAGTCAATTTTCATGTCCATTGTCCTGTCCCTATGTCTCCATTTGACACTCAGCAGTGTTACTTATGACAGCAAGGCTCTTATCATTAATGGGCAGAGAAGAATTCTCTTCTCTGGCTCCATTCACTATCCAAGAAGCTCACATGAGATGTGGGAAGGCCTCATACAGAAAGCAAAAGATGGTGGGTTAGATGTTATTGACACTTACGTGTTTTGGAATGTCCACGAGCCTTCTCCTGGCAATTATAATTTTGAGGGGAGATACGATTTGGTTCGGTTCATCAAGTTGGTGCAGAAAGCCGGGTTGTATGTGCATCTTCGAATTGGACCATACATATGTGCAGAGTGGAATTTTGGTGGGTTTCCTGTTTGGTTGAAG…	MAASSGSKSIFMSIVLSLCLHLTLSSVTYDSKALIINGQRRILFSGSIHYPRSSHEMWEGLIQKAKDGGLDVIDTYVFWNVHEPSPGNYNFEGRYDLVRFIKLVQKAGLYVHLRIGPYICAEWNFGGFPVWLKFVQGISFRTDNKPFKHAMQNFTQKIVQMMKDEKLFKSQGGPIILSQIENEYEPEREEFGSAGEAYMKWAAEMAVELNTEVPWVMCKEEDAPDPVINTCNGFYCHSFSPNKPSKPKMWTEAWTGWFSDFGGQNYQRPVEDLAFAVARFIQKGGSFVNYYMYHGGTNFGRTAGGPFITTSYDYDAPIDEYGLIREPKYGHLKELHKAIKLCENALLTANSTVTSLGNYEEAHVFSSESWQCAAFLSNYHTESAARVTFNNRQYNLPPW…	8	6057618	6062060	1	aKN0AAP2YD24FM1_c|citrus ESTs	ATGGCAGCTAGCTCCGGTTCCAAGTCAATTTTCATGTCCATTGTCCTGTCCCTATGTCTCCATTTGACACTCAGCAGTGTTACTTATGACAGCAAGGCTCTTATCATTAATGGGCAGAGAAGAATTCTCTTCTCTGGCTCCATTCACTATCCAAGAAGCTCACATGAGATGTGGGAAGGCCTCATACAGAAAGCAAAAGATGGTGGGTTAGATGTTATTGACACTTACGTGTTTTGGAATGTCCACGAGCCTTCTCCTGGCAATTATAATTTTGAGGGGAGATACGATTTGGTTCGGTTCATCAAGTTGGTGCAGAAAGCCGGGTTGTATGTGCATCTTCGAATTGGACCATACATATGTGCAGAGTGGAATTTTGGTGGGTTTCCTGTTTGGTTGAAG…	MAASSGSKSIFMSIVLSLCLHLTLSSVTYDSKALIINGQRRILFSGSIHYPRSSHEMWEGLIQKAKDGGLDVIDTYVFWNVHEPSPGNYNFEGRYDLVRFIKLVQKAGLYVHLRIGPYICAEWNFGGFPVWLKFVQGISFRTDNKPFKHAMQNFTQKIVQMMKDEKLFKSQGGPIILSQIENEYEPEREEFGSAGEAYMKWAAEMAVELNTEVPWVMCKEEDAPDPVINTCNGFYCHSFSPNKPSKPKMWTEAWTGWFSDFGGQNYQRPVEDLAFAVARFIQKGGSFVNYYMYHGGTNFGRTAGGPFITTSYDYDAPIDEYGLIREPKYGHLKELHKAIKLCENALLTANSTVTSLGNYEEAHVFSSESWQCAAFLSNYHTESAARVTFNNRQYNLPPW…	8	6057618	6062075	1	Cs8g08270.1	99.3
CitBGAL20	Ciclev10027805m	ATGGCAAGCAAAGAGATTCTGCTTCTGGTTCTCTGCTGGGGGTTCGTAGTTCTTGCCACGACGTCTTTTGGTGCCAATGTAACGTACGATCACAGAGCAGTCGTCATTGGTGGCAAACGTAGAGTCTTGATATCTGGCTCCATTCATTATCCACGCAGCACCCCCGAGATGTGGCCGGACCTTATTCAGAAATCCAAGGATGGAGGCTTAGATGTGATTGAGACTTATGTTTTTTGGAATCTACACGAACCAGTTCGAAACCAGTATAATTTTGAAGGAAGATATGATTTAGTTAAGTTCGTGAAGCTGGTAGCCGAAGCTGGTCTATATGCTCATCTTCGCATTGGTCCATATGTTTGTGCTGAATGGAACTTTGGAGGATTCCCTCTTTGGTTGCAT…	MASKEILLLVLCWGFVVLATTSFGANVTYDHRAVVIGGKRRVLISGSIHYPRSTPEMWPDLIQKSKDGGLDVIETYVFWNLHEPVRNQYNFEGRYDLVKFVKLVAEAGLYAHLRIGPYVCAEWNFGGFPLWLHFIPGIQFRTDNEPFKAEMQRFTAKIVDMMKQEKLYASQGGPIILSQIENEYGNIDSAYGAAGKSYIKWAAGMALSLDTGVPWVMCQQSDAPDPIINTCNGFYCDQFTPNSNNKPKMWTENWSGWFLSFGGAVPYRPVEDLAFAVARFFQRGGTFQNYYMYHGGTNFDRTSGGPFISTSYDYDAPLDEYGLIRQPKWGHLKDLHKAIKLCEAALVATDPTYPSLGPNLEATVYKTGSGLCSAFLANIGTNSDVTVKFNGNSYLLPAW…	8	22165581	22171683	-1								Cs8g16800.1	100
CitBGAL21	Ciclev10004268m	ATGCATTCCAAAAAGAACAACAGAGCGTTGCTTCAGTGTCTCGCACTCTCGGTTTATCCGATGATGATGATGATGATTCACTTGTCATGCGTATCATCATCATCAGCTTCAACTTTTTTCAAGCCCTTCAACGTCAGCTACGACCACAGGGCTATCATCATCGACGGCAACCGCCGTATGCTCATCTCTGCTGGAATTCACTACCCTCGTGCCACTCCTGAGATGTGGCCTGATCTGATTGCAAAGAGTAAGGAAGGTGGAGCAGATGTGATCGAAACTTATGTGTTTTGGAATGCACATGAATCAATCAGAGGACAGTATAACTTCAAGGGGAAAAATGATATCGTTAAATTTGTGAAGTTAGTGGGATCCAGTGGGCTCTATCTCCAACTCCGCATT…	MHSKKNNRALLQCLALSVYPMMMMMIHLSCVSSSSASTFFKPFNVSYDHRAIIIDGNRRMLISAGIHYPRATPEMWPDLIAKSKEGGADVIETYVFWNAHESIRGQYNFKGKNDIVKFVKLVGSSGLYLQLRIGPYVCAEWNFGGFPVWLRDIPGIEFRTNNAPFKEEMQRFVKKIVDLMREEMLFSWQGGPIIMLQIENEYGNMESSYGQQGKDYVKWAASMALGLGAGVPWVMCKQTDAPENIIDACNGYYCDGYKPNSYNKPTLWTENWDGWYTTWGGRLPHRPVEDLAFAVARFFQRGGSFMNYYMYFGGTNFGRTSGGPFYITSYDYDAPIDEYGLLSEPKWGHLKDLHAAIKLCEPALVAADSAQYIKLGQNQEAHVYRANVLSEGPNSNRYG…	9	15624983	15638532	1	aCL5302Contig1							orange1.1t02463.1	98.7
GH51s α -L-arabinofuranosidases
CitASD1	Ciclev10011228m	ATGGCTTTTTGCAAGGTCCCTTCGTGCGGTGTTCTTTTGCTTCTCTTCTTCATTGCAACTTGTTTTCTTTTTCAATGTTTTGCTGCCGAAGTAGAGGTAAACCAGACGGCAAGGCTGTTGGTAGATGCCTCTCAAGGTCGGCTAATACCTGAAACTCTGTTTGGAATATTCTTTGAGGAGATCAATCATGCTGGAGCTGGTGGACTGTGGGCAGAGCTTGTGAGCAACAGAGGTTTTGAAGCTGGGGGTCAAAACATTCCCTCAAATATTGATCCTTGGGCTATTATTGGTAACGATTCATCTTTAATTGTATCAACAGACCGCTCATCATGCTTTGAGCGGAACAAAGTTGCCCTTCGAATGGAGGTGCTTTGCGACAGTCAAGGCACTAATATCTGT…	MAFCKVPSCGVLLLLFFIATCFLFQCFAAEVEVNQTARLLVDASQGRLIPETLFGIFFEEINHAGAGGLWAELVSNRGFEAGGQNIPSNIDPWAIIGNDSSLIVSTDRSSCFERNKVALRMEVLCDSQGTNICPVGGVGVYNPGYWGMGIKQGKTYKVVFYIRSLGSVNISVSLTSSNGLQTLATSNIIASASDVSNWTRVETLLEAKETNPNARLQLTTSRKGVIWFDQVSAMPLDTYKGHGFRNVLFQMLADLKPRFLRFPGGCFVEGEWLRNAFRWKASVGPWENRAGHFGDVWMYWTDDGLGYFEFLQLAEDLGALPIWVFNNGISHTDEVDTSAVLPFVQEALDGIEFARGDANSTWGSVRAAMGHPDPFDLRYVAVGNEDCPKKNYRGNYLKF…	6	21635127	21642518	-1	aKN0AAP8YC15FM1_c							Cs6g16270.1	97.6

## Sheet: Carbohydrate Esterases
Gene name	Phytozome v10.2	CDS	peptide	Scaffold	Gene start	Gene end	Strand	Gene prediction	CDS	peptide	Scaffold	Gene start	Gene end	Strand	C. sinensis	% similarity
CitXXX.XX	INDUCED only in AZ-C
CitXXX.XX	INDUCED in both AZ-C and fruit rind
CitXXX.XX	INDUCED only in fruit rind
CitXXX.XX	REPRESSED only in AZ-C
CitXXX.XX	REPRESSED in both AZ-C and fruit rind
CitXXX.XX	REPRESSED only in fruit rind
CitXXX.XX	No hybridization results
CE8s Pectin-methylesterases
CitPME1	Ciclev10010616m	CAAACATTATGCCACACCAAAGGGCTGAGACCAAGAAACTCTGTAGGGAAGCAACAAACAAGGAATATGACCAGAACCCAATTCTCAGAACAACAATTCATGAAGTGGGTCAATTTTGTTGGAAGGTTAAAACACTCGGTCTTTAAGTCAGCGAAGAACAAGCTCTTCCCTGCATACACGTTAACCGTGGCCAAGAACCCGGCTGCTGGAGACTTCACCAAAATTCAAGATGCCATTGATTCTCTTCCTTTCATCAATCTCGTCAGAGTGGTTATCAAAGTCCATGCAGGAGTCTACAAAGAGAAGGTTAACATACCACCATTCAAATCATTCATAACCATAGAAGGAGCAGGCGCAGATAAAACAATTGTTCAATGGGGAGACACAGCTCAAACTCGT…	QTLCHTKGLRPRNSVGKQQTRNMTRTQFSEQQFMKWVNFVGRLKHSVFKSAKNKLFPAYTLTVAKNPAAGDFTKIQDAIDSLPFINLVRVVIKVHAGVYKEKVNIPPFKSFITIEGAGADKTIVQWGDTAQTRGPRGQPIGTWASATFAVNAPYFIAKNITFKNTTPVPAPGAVGKQAVAFRISADTATFWGCKFLGAQDTLYDHVGRHYYKDCYIEGSVDFIFGNALSLFEGCHVHAIAQYTGALTAQGRSSLLEDTGFSFVNCKVTGSGALYLGRAWGPFSRVVFAYTDMDNIIIPKGWYNWGDPNREMTVFYGQYKCKGPGASFAGRVSWARELTDEEAKPFISLSFIDGSEWIKL*	1	7860508	7863374	-1	ESTs|FGENESH	ATGGCCAAGCTTGAACATGCTCTCTTTTTTGTTCTTGTAACTATTATTCTTTGTTCAAGCCAAACATTATGCCACACCAAAGGGCTGAGACCAAGAAACTCTGTAGGGAAGCAACAAACAAGGAATATGACCAGAACCCAATTCTCAGAACAACAATTCATGAAGTGGGTCAATTTTGTTGGAAGGTTAAAACACTCGGTCTTTAAGTCAGCGAAGAACAAGCTCTTCCCTGCATACACGTTAACCGTGGCCAAGAACCCGGCTGCTGGAGACTTCACCAAAATTCAAGATGCCATTGATTCTCTTCCTTTCATCAATCTCGTCAGAGTGGTTATCAAAGTCCATGCAGGAGTCTACAAAGAGAAGGTTAACATACCACCATTCAAATCATTCATAACC…	MAKLEHALFFVLVTIILCSSQTLCHTKGLRPRNSVGKQQTRNMTRTQFSEQQFMKWVNFVGRLKHSVFKSAKNKLFPAYTLTVAKNPAAGDFTKIQDAIDSLPFINLVRVVIKVHAGVYKEKVNIPPFKSFITIEGAGADKTIVQWGDTAQTRGPRGQPIGTWASATFAVNAPYFIAKNITFKNTTPVPAPGAVGKQAVAFRISADTATFWGCKFLGAQDTLYDHVGRHYYKDCYIEGSVDFIFGNALSLFEGCHVHAIAQYTGALTAQGRSSLLEDTGFSFVNCKVTGSGALYLGRAWGPFSRVVFAYTDMDNIIIPKGWYNWGDPNREMTVFYGQYKCKGPGASFAGRVSWARELTDEEAKPFISLSFIDGSEWIKL*	1	7860508	7863434	-1	Cs4g15560.1	99.7
CitPME2	Ciclev10010593m	ATGGGCAGAAGTGCTTTTCTTGTAGCTTTTGCGGGCTTTCTCCTCATTGTTCAGGTGAGTTTATCACAGCATGAAGCAGCTTACAGTTACAGAAGAAACTTTATAACTTGGGATGATCTGAAAGTGGATTGGCAAAAAGCTTGGCTTGATACAAGAGAGAGTGTCAATAGGACAAGGCTTATAATTGTCGACAAGAATGGTGGTGGCCATTCAAGTACAGTTCAAGGAGCAGTGGATTTGGTTCCGGAAAATAATTCTGAAAGAGTTAAAATCTACATTCTCCCTGGAGTCTACAGGGAAAAAGTGACAGTGCCACAGAACAAACCTTATATCTCATTCATTGGACACGAGCAACGAGCCTCTGAAACAGTAATCTCTTGGCACAATAAAGCATCTGAT…	MGRSAFLVAFAGFLLIVQVSLSQHEAAYSYRRNFITWDDLKVDWQKAWLDTRESVNRTRLIIVDKNGGGHSSTVQGAVDLVPENNSERVKIYILPGVYREKVTVPQNKPYISFIGHEQRASETVISWHNKASDKDSNGIELGTYKSASVSVFADFFCATGITFANTVVAVPGGIGMQAVALRLAGDKAMLYKVKVLGTQDTLLDDTGSHYFYQCHIQGSIDFIFGRARSLYQDCVLQSIAEKSGAIAAHHRDIPDDSSGFSFVNCVINGTGKIYLGRAWGNYSRIIYSYSYLEDIIYPTGWSDWNMPYRDRTVVFGEYQCSGKGADRSHRPSWLKSLSYEEVQPFLNVTFIDGKEWLRL*	1	23346722	23348273	1								Cs4g08960.1	90.1
CitPME3	Ciclev10010655m	ATGGCTTCAGCATATTTTACGATGCTGTTAATTTGCTTTCGGCTTTCCATCACGACAGTGCTTGGCCATCCCAAACAGATCCCATTGGACGCTTCGAAGCTCGAAGCATGGATAGGAGAAAACATGAGAGAGTTCACGGAGAGAAAGGCCCAACTGGCGCAGGGCAAGAACGACACCGTTGTGGACCACGTTCTTGCCGCTGCGGAGGATGGGTTTAGGGTTATAACGGTGAGGAAGGACGGGAGAGGAGATTTCAAGACGATCACCGATGCAGTGAAGAGCATTCCGTCGGGGAATACGCGACGGGTGGTTGTTAAGATTGGCGGCGGAGAGTACTGGGAGAAGATCACCGTTGAACGTTCTAAGGATTTCGTGACGTTCTTCGGGGACCCATTTGAC…	MASAYFTMLLICFRLSITTVLGHPKQIPLDASKLEAWIGENMREFTERKAQLAQGKNDTVVDHVLAAAEDGFRVITVRKDGRGDFKTITDAVKSIPSGNTRRVVVKIGGGEYWEKITVERSKDFVTFFGDPFDMPKIVFNGTALHFGTVNSATVAVESDYFVAANVAFVNSAPMPDGKRLGAQAVAMRISGDKAAFHNCKFIGYQDTLCDDKGRHFFKDCYIQGTVDFIFGNGKSLYLRTTIVSVANGLGVITAQAREQVNDDSGFTFVHCNITGSGDTYLGRAWKERPRVLFAYTYMGTLINSQGWAAGEHSQSHKTVYYGEYKCMGPGASSSGRVKFAKLLSEAEAKPFLSMTYLNGNKWLLPLPNL*	1	24773591	24775559	-1								Cs4g06890.1	99.7
CitPME4	Ciclev10007964m	ATGGAAACTCCTCCATGGTTTACAATAATATTGCTTTGGCTCTTGAGTGCCTCCATGTCATGGGGTGCCATGCATAGTAACAATTACCAAAACAAAATTCAGAAAGAGTGCAGCTTCACTAGATTCCCAATCCTTTGTGTCCAGACATTGATGGGGTTTGAGAGTACAAAACATCAACAACACATCCATCTTATGTCTGCTCTCGTTAACAAAAGCATTGCTGAAACCAAGCTGCCTACTTCATATTTTTCTAATTTCAGCTCCCAGTTACTTGCCAAAGATTTCCAAGGTGTACGTGCTGTCACAGATCACTGCGAAGAGATGATGAGTATGTCACTCAAACGGCTAGAGAAGTCACTATTAGCCCTACAAAATTCCCCAACAAAAAACAAGCATGAC…	METPPWFTIILLWLLSASMSWGAMHSNNYQNKIQKECSFTRFPILCVQTLMGFESTKHQQHIHLMSALVNKSIAETKLPTSYFSNFSSQLLAKDFQGVRAVTDHCEEMMSMSLKRLEKSLLALQNSPTKNKHDIQTWLGAALTFQQTCKDSVNSLGLSARNEVIKKISQKMDYLSQLTSNPLALVNRIDRASYPKNSTYNRRLDEEQGDFPNWVSAKNRKLLQAPRINANVIVAQDGTGNYRTVSEAISAASGNRFVIYVKAGVYKEKIRTNKDGITLIGDGKYTTIITGDDNARRGTSMPGTATFTITGDGFIARDIGFHNTAGPQGEQALALNVASDHTVFYRCSIAGYQDTLYALALRQFYRDTDIYGTIDFIFGNAAAVFQNCYLVLRRPGGSYN…	1	24942842	24945912	-1	aCL1215Contig1							Cs4g06710.1	98.3
CitPME5	Ciclev10007819m	ATGGTATTTCAAGATTTTGATCATTTATCAGAACGCAGGAAGGCTGAAAGACAACGAAAATTTCGAAAGCGAGTAACAATTTCTGCCATTTCTGCATTTGTTCTCATCATTTTGATTGCTGCGGGAGTTTTTGGAGTTGTTTCTCAAGATAATGGCGAGGATTCTTCTAAAACATCACCGTCATCTGGAGCCCCGAAAGGGATTTCGCGTGCACAAAAAATGATTTCAACTATATGTGGGAGCACCGCATACAAGAATTCGTGCAATGATACTTTGTCGGCTGCAGCCGAAAAGGACCCTTCGATTGATGAACCCAGAGAATTTCTCAAGGCTTCAATAGCAGCAACTGTTGTTGAGCTTGACAAGGCCATTAAGAAAGTAGAATCCAACGATTTTAAT…	MVFQDFDHLSERRKAERQRKFRKRVTISAISAFVLIILIAAGVFGVVSQDNGEDSSKTSPSSGAPKGISRAQKMISTICGSTAYKNSCNDTLSAAAEKDPSIDEPREFLKASIAATVVELDKAIKKVESNDFNAPETEAAFKVCKKVIDDAKEELNRCVSQVGGKKRDLGMLVERAGELNNWLSAVMTYQQTCIDGFPEGKMKSDMDKTLNETQQLTSNSLAMISQFSKYLSSIMNLTPEGTDHRGLLDSKDGVLPSWMSHQERKMLQNEENNKIEPHLIVAKDGSGNFTTISEALAAVPQKYEGRFVIYVAAGIYEESVTVSKRMVNLTIIGEGSQKSIIVGRKSVADGINIYDTATFVAIGEGLFAKSMGFRNIAGPEKGEAVAARVQSDRATFHNC…	1	24960580	24962726	-1								Cs4g06700.1	99.5
CitPME6	Ciclev10007942m	ATGGCTACTTCCTCCTTTCTGAAACTCACCTTGCTCCTCTTCACAATCTCCATCTACATCACAGCTACTCTAAGCACTCCTTCAACAACTTCTCTACACACCAACATATCTTCAATAAGCAATTTTTGCAAAAGCACTCCGCACCCAGATGCTTGTTTTGAGTCATTGAAGCTCTCTATATCAATCAATATCAGTCCAAACATCATCAACTTCTTGCTTCAAACTCTCCAAATGGCCATATCCGAAGCCGGGAAGGTCACCAATCTATTGTCCGGTGCAGGCAGCTCTAATATTGTCGAGAAACAGAGAGGCACAATCCAAGATTGTAAAGAACTTCACCAAATCACATTATCCGCTTTACAGAAATCTCTCCCGAAAATCCGTGCAGCTCATGATGCT…	MATSSFLKLTLLLFTISIYITATLSTPSTTSLHTNISSISNFCKSTPHPDACFESLKLSISINISPNIINFLLQTLQMAISEAGKVTNLLSGAGSSNIVEKQRGTIQDCKELHQITLSALQKSLPKIRAAHDAKTLSDARAYLSAALTNKNTCLESLNSASGSLKQPLVNSITSTYRYVSNSLSALPKPATTEGNKHRRRLMGFPEWLSRKDRRILQSSDDDNEYDQSQVLTVAADGTGDFTTITDAINFAPNNSDDRVVINIKQGVYEENLEIPSYKTNIFLRGGGKDSTIITGSRSVGDGWTTFRSATVAVSGDGFLARDLTIENKAGPEKHQAVALRVNADFAALFRCSFSGYQDTLYVHSFRQFYRECDVYGTIDYIFGNAAVVLQACNIVSRMP…	1	24964826	24966867	-1								Cs4g06690.1	99.1
CitPME7	Ciclev10007940m	ATGGCTGCTTCCTCCTTTCTGAAACTCACCTTGCTCCTCTTCACAATCTCCATCTCCATCACAGCTACTCTAAGCACTCCTTCAACAACTTCTCTACACACCAACATATCTTCAATAAGCAATTTTTGCAAAAGCACTCCGCACCCAGATGCTTGTTTTGAGTCATTGAAGCTCTCTATATCAATCAATATCAGTCCAAACATCATCAACTTCTTGCTTCAAACTCTCCAAATGGCCATATCCGAAGCCGGGAAGGTCACCAATCTATTGTCCGGTGCAGGCAGCTCTAATATTGTCGAGAAACAGAGAGGCACAATCCAAGATTGTAAAGAACTTCACCAAATCACATTATCCGCTTTACAGAAATCTCTCCCAAAAATCCGTGCAGCTCATGATGCT…	MAASSFLKLTLLLFTISISITATLSTPSTTSLHTNISSISNFCKSTPHPDACFESLKLSISINISPNIINFLLQTLQMAISEAGKVTNLLSGAGSSNIVEKQRGTIQDCKELHQITLSALQKSLPKIRAAHDAKSLSDARAYLSAALTNKNTCLESLNSASGSLKQPLVNSITSTYRYVSNSLSALPKPATTEGNKHRRRLMGFPEWLSRKDRRILQSSDDDNEYDQSQVLTVAADGTGDFTTITDAINFAPNNSDDRVVINIKQGVYEENLEIPSYKTNIFLLGGGKDSTIITGSRSVGDGWTTFRSATVAVSGDRFLARDLTIENKAGPEKYQAVALRVNADFAALFRCSFSGYQDTLYVHSFRQFYRECDVYGTIDYIFGNAAVVLQACNIVSRLP…	1	24979667	24981789	-1	aCL3567Contig2							Cs4g06670.1	99.6
CitPME8	Ciclev10007993m	ATGCTGAATTTTTGCAAGCTCTTCATTTTTATTTTCTTGGTCAGTGCGGTTTCTTTGAGCAGCAGCAGCAATGCGGGCTCGGAATATTCGCAGGCCGAGTGCTTGAAAGTGCCAGCCTCCTCTTTCATGAGCTCTTTGAAGACCACCGTTGATGCCATTCAACAGGTGGTTCCTGTTATTTCTAACTTTGCTAATTTGTTTGGTGATTTTCGTCTCACAAATGCTATATCAGACTGTCTTGATCTCCTTGATTTCTCTGCTGATGAGCTCACCTGGTCCATCTCTGCTTCCCAAAATCCCACTGGAAGGCATAACGGCAGTGGAGATCTAAGTTCAGACTTGAGAACTTGGTTAAGTGCTGCACTGATTAATCAGGAGACATGCATTGATGGGTTTGAT…	MLNFCKLFIFIFLVSAVSLSSSSNAGSEYSQAECLKVPASSFMSSLKTTVDAIQQVVPVISNFANLFGDFRLTNAISDCLDLLDFSADELTWSISASQNPTGRHNGSGDLSSDLRTWLSAALINQETCIDGFDGTNSIVKGVVSGSLNQISSSVQELLTMVHPSPSQWSNEGSSSNSGGKSRGGGGKSSGQFPHWFKREDRKLLLVNGVQADVVVAADGTGNFTKIMDAVLAAEDYSMKRFVIYIKRGVYKENVEIKKKKWNLMMVGDGIDATIISGNRNFMDGWTTFRSATFAVSGRGFIARDITFENTAGPEKHQAVALRSDSDLSVYFRCAIKGYQDSLYTHTMRQFFRECKISGTVDFIFGDATAMFQNCQILAKKGLDNQKNTITAHGRKDPNE…	1	24986848	24990044	-1	aC05807A09SK_c							Cs4g06650.1	99.6
CitPME9	Ciclev10007806m	ATGCTCCATCCATGTTTCAACTTAATCACACGAAACCAAGCCTTATCAACAAAAATCTTTACCACAATGGCACAACCCAGAAAGCTTTTCTTGGCTCTCTTTGCAGTAGTCCTCGTAGTCACTGCCGTTGTCACTATAATTGCCACCAGAAAGAACAACTCTAGCAACACAAATGATGAGCACATTGCGGCTCATGCTCATGCTTACGCTCAACCAGTTATCAGATCCTCCTGCAGTGCCACATTGTACCCAGAGCTATGCTTCTCAGCACTCTCCGCAGCTCCAGCTGCTGCAGTGTCAAAAGTGAACAGCCCAAAAGATGTGATACGACTGTCGCTCAACCTTACCATCACTGCAGTTCAACACAACTACTTCGCCATCAAGAAACTCATCACCACT…	MLHPCFNLITRNQALSTKIFTTMAQPRKLFLALFAVVLVVTAVVTIIATRKNNSSNTNDEHIAAHAHAYAQPVIRSSCSATLYPELCFSALSAAPAAAVSKVNSPKDVIRLSLNLTITAVQHNYFAIKKLITTRKSTLTKREKTSLHDCLEMVDETLDELYKTEHELQGYPAAANNKSIAEQADELKILVSAAMTNQETCLDGFSHERADKKIREELMEGQMHVFHMCSNALAMIKNMTDGDIGKDIVDHYSKARRLDDETKWPEWLSAGDRRLLQATTVVPDVTVAADGSGNYLTVAAAVAAAPEGSSRRYIIRIKAGEYRENVEVPKKKINLMFIGDGRTTTIITGSRNVVDGSTTFNSATVAVVGDGFLARDITFQNTAGPSKHQAVALRVGSDLS…	1	25001341	25004726	-1	aCL5702Contig1|CsPME4							Cs4g06630.1	94
CitPME10	Ciclev10014888m	ATGGATAAGCTTGTGCTCATCCAACTTTTTATTCATTTTCTAATTTTTTCTTTAAACTTTGCGCATGGTGAATTAATAACATCGTGTAGCCAGACCCCATATCCTGAAATATGCAACCACTACACGGCCACTAATTTTTTATCAAACTTGGAGCTAGATCAAACCCAATTCTCTTTTCGTGACCTAAACCTTAAGGTCACCATTGACCAAGCCATACACGCTCACAAACTTATTTCGACTATGGACTTGAGTTCATTCAATAAGCTAGCCAAGTTAGCTTTGGTCGATTGCAAGGATCTTTACGACGATACAGTTAATCATCTCAATCGTTCGATGAGCTCTAGCAATCCGATTGATTCTGTAACTTGGCTAAGTGCAGCTATTGCCAATCAAGAAACA…	MDKLVLIQLFIHFLIFSLNFAHGELITSCSQTPYPEICNHYTATNFLSNLELDQTQFSFRDLNLKVTIDQAIHAHKLISTMDLSSFNKLAKLALVDCKDLYDDTVNHLNRSMSSSNPIDSVTWLSAAIANQETCKNGFTDFNLHSHLQSLPFMSGNFSKLLSNSLAITKSTVSSSSIPYAYKRNGGRRLLVNGFPTWVSAADRRLLQSSGVGPKADVVVAQDGSGNYKTISEGVAAAVKLGGGSKRVVIYVKRGVYRENVEIKRSMKNLMLIGDGIDATIVTSNKNGKGGTTTFRTATFAVSGQGFIARDMTFENTAGPANHQAVALRSGSDFSVFYSCSFKGYQDTLYVYSQRQFYRNCDIYGTQDFIFGDAAVVLQSCNIYIRKPIGGQKNTVTAQG…	2	27474500	27476966	1	aC31601A01EF_c							Cs2g17070.1	99.4
CitPME11	Ciclev10014787m	ATGGCTACAATCGACCGGCCTCTGCTGCTAAAGTTACACACGCCAAAAGCCTCTAAACGTAAAATTCTCCTTCTAATTCTTTCCGTGGTTTCCGTGATGTGCTCGGCTACATTTGTTGCCATACACTGTATCAAAGCTATCAACTCAAATAATCATTGGTCACTGCATCAAATTTGTGCTAACGCCCGGGACCAGTCATCGTGCATGGCCATGGTTTCAGAAACAACCTCAATTAATGCAACCACAAAAATGAACGAGGTTGATCTGTTACTTATCTTCTTAAACAAGTCCACATCATACATACAAGAAACTATCGAGGTGGCCAATCACGTCAAGCATCGGATCAACAGCCCTAGAGGACAAGCGGCTTTGACTGATTGTGTGGAGTTGTTGGAGTTA…	MATIDRPLLLKLHTPKASKRKILLLILSVVSVMCSATFVAIHCIKAINSNNHWSLHQICANARDQSSCMAMVSETTSINATTKMNEVDLLLIFLNKSTSYIQETIEVANHVKHRINSPRGQAALTDCVELLELSVDRITDSMAALKKRRTSSNEDAHAWLSGVLTNHVTCLDGLDGSATKLMEPRLVELMARAANSLAILVAISPYNTNVIQQYYLRKEIQFPSWVTSRDRLLLRPSQAEAAKANVVVAKDGSGNYKTVKEAVASAPDNSKTRYVIYVKKGTYKENVEVGKKKKNLMIVGDGMDLTIITGSLNVVDGSTTFKSATIAVGGDGFIAQDLWIQNTAGPEKHQAVALRVSADQSVINRCRIDAYQDTLYAHTNRQFYRDCYITGTVDFIFGN…	2	32218213	32220325	-1	aCL1691Contig1							Cs2g07660.1	98.9
CitPME12	Ciclev10020787m	ATGCTGTTTAATTTAATGTCATCTGTTACTTGTTTTTCGTTCTTTCACTTGTACATTGTTACTTCTTTCTTGTCTCTTGCATTGTTTCAGGTTACGATCTCGGCCACAGCTCAAGCTGCAAATTCTACTAAGCACCATCACATGTGGATTGGACCCGTCGGCCACCGTGTAATCACCGTTGATGTTAATGGGTCCGGCGAGTTCAAATCGGTCCAAGCTGCCGTTGATTCCGTCCCTGAAAGAAACAGAATGAACGTGCTTATTCAAATTAGCGCAGGTTGTTACATAGAGAAGGTGACGGTGCCAGTGTCGAAACCGTACATCACGTTTCAAGGTGCAGGGAGGGATCGGACGGTGATCGAGTGGCATGATCGAGCATGTGATCGTGGGGCTAATGGC…	MLFNLMSSVTCFSFFHLYIVTSFLSLALFQVTISATAQAANSTKHHHMWIGPVGHRVITVDVNGSGEFKSVQAAVDSVPERNRMNVLIQISAGCYIEKVTVPVSKPYITFQGAGRDRTVIEWHDRACDRGANGQQLRTYQTASVTVFANYFSARNISFKNTAPAPLPGMQGWQAAAFRISGDKAYFSGCGFYGAQDTLCDDAGRHYFKECYIEGSIDFIFGNGRSMYKDCELHSIATRFGSIAAHDRKSPDEKTGFAFVRCRVTGTGPLYVGRAMGQYSRIVYSFTYFDDLVAHGGWDDWDHISNKNKTAFFGVYKCWGPGAANVRGASWARELDYESAHPFLVKSFINGRHWIAPSDA*	3	5609608	5612260	-1	aCL583Contig2							Cs5g08840.2	99.2
CitPME13	Ciclev10019376m	ATGGGTTACGGCAGGCTCCAGCCCTCCTCCGACCCCGGGGGTTCTTCATTCCGCGAGGACCAACCCGGGCATGCCACGTCGGCGCCCCAGCCTTCTTCCCGCAGCAGGAAGAAGCTCATCCTCCTCTCCGTCCTCTCATTCGCATTAATCATCGCCTCCGCCGTCTCCGCCGTCCTCCTCGTGGGCCTCAAGACGAGTGCCGTGGGCCCCACCATCGGCCACAAGCCCACCCAGGCCATTTCCCGCACGTGCAGCAAGACCCTCTACCCGAACCTCTGCGTCAGCTCGCTCCTCAACTTCCCGGGCTCGCTCACCGCCTCCGAGCAGGACCTCGTCCACATTTCGTTCAACATGACGCTGCAGCACTTCAGCAGGGCCCTGTATTTCACCTCCGGTATC…	MGYGRLQPSSDPGGSSFREDQPGHATSAPQPSSRSRKKLILLSVLSFALIIASAVSAVLLVGLKTSAVGPTIGHKPTQAISRTCSKTLYPNLCVSSLLNFPGSLTASEQDLVHISFNMTLQHFSRALYFTSGISYLQMDPHVRSAFDDCLELLDDSVDALSRSLGSVLLLPGGDINKREDVLTWLSAALTNHDTCSEGFEELNGPVKDQVSDKLKDLSELVSNCLAIFSAGGDSDDFSGVPIQNRRRRLLSSSEEDDTWGENDDDDNVPRWVSRETRRLLSLPVPHIQADIIVSKDGTGTVKTIAEAIKKAPENSDRRTIIYVRAGRYEESNLKVGRKKRNLMFIGDGKGKTIITGGRNVFDKLTTFHTASFAATGAGFIARDMTFENFAGPAKHQAVA…	3	11399185	11403123	1	aCL4116Contig2							orange1.1t02719.1	98.8
CitPME14	Ciclev10023535m	ATGGCTTCTAAGCTCTTCTTTCTCAAAACATCACCTATACTCATTGCTCTTCTTTTATTTGCCTATCCATCTTGTGCGGCAGCAGATGTTGATCCAACAGCCCCTGTCCCACCAGAAACCATTTGCATGTGCACTCCAAACCCTTCCGATTGCAAATCGGTGCTCCCTGCTGCTTCCCCTAACCAAACCGCAGATACCTACACCTATTGTCGCTTATCCATCCGCAAAGCTTTAACACAAACTCAAAAATTCCTCAACTCAGTTGACAATTATCTTAAATCCGGATCCACATTATCAATCAGTGCAATCCGAGCGCTAGAAGATTGCCGTTTACTAGCTGATCTTAACATGGACTATCTTTCAACCTCTTATCAAACTGCCAATACCACTAGCCAAATT…	MASKLFFLKTSPILIALLLFAYPSCAAADVDPTAPVPPETICMCTPNPSDCKSVLPAASPNQTADTYTYCRLSIRKALTQTQKFLNSVDNYLKSGSTLSISAIRALEDCRLLADLNMDYLSTSYQTANTTSQILPTIQADDVQALLSAILTNQQTCFDGLQTSANSFESINNGLSVPLLEDIKLSSVLLALFKKGWIGDQKKIITSWQLSSTQRLVGQNGRLPLVMSDRIRAIYESAVRGRKLSSTGDGDQGVLVTDIVTVAQDGSGNFSTITDAINFAPNNTNVSNGYFLIYITAGVYQEYVSIPKNKINLLMIGDGINQTIITGNRSVVDGWTTFNSATFIVVAPNFVASSITFRNTAGPSKGQAVALRSGADFSTFYSCSFEGYQDTLYTHSLRQF…	3	37846062	37848400	1								Cs5g23310.1	100
CitPME15	Ciclev10024391m	ATGGGTTCAAATCTCCTCCTCCTAATAACATTGCCTATTCTCATTTCCATTCCTTTCTTTTCCAATCCAACTTGTGCGGCAAATTTTGCTCGAAAAAGTCGCGTCACACCAGAAACTATTTGCAAGTACACCCCAAATCAATCCTATTGCAAATCTATGCTTGCTAATGCTAAGCAAACCACTGATATCTACACCTATGGCCGATTCTCCTTCCGCAAGGCTTTTTCGCAATCTCGAAAATTCTTGGACTTGATTGACAATTATCTTAAACGGCCGTCCACTTTATCGACCGCTGCTATACGTGCTCTGGAAGACTGCTATTTACTAGCTGATCTTAACATGGACTATTTTTCAAGGTCCTTCCAAACTGTGAACAACACTAGTCAAATTCTGCCTGCC…	MGSNLLLLITLPILISIPFFSNPTCAANFARKSRVTPETICKYTPNQSYCKSMLANAKQTTDIYTYGRFSFRKAFSQSRKFLDLIDNYLKRPSTLSTAAIRALEDCYLLADLNMDYFSRSFQTVNNTSQILPAKQADDVQTRLSAILTNQQTCLDGLQAAVSAWSTANGLSVPLLDDTKLSSVLLALFKKGWVGQKRKGTIWQMPTGTQRLFGKDGRLPLIMSDENRAIYEKVCKRKLNSGDGRGVLVSKIVTVSQDGRGMFSTINDAINAAPNDTDVSNGYFLIYIKDGVYQEYVSIAKNKINLMMIGDGINQTIITGNRSAVDGWTTFNSATFAVVAPNFVAVDITFRNTAGPSKFQAVALRSGGDLSTFYSCSFEGYQDTLYTHSLRQFYRECDIY…	3	45941780	45943616	-1								Cs5g33390.1	100
CitPME16	Ciclev10023588m	ATGGCTTCCAAACTCTTCTTTCTGATCAGAGCATTTCCAATTCTCCTTGCCCTTCCTTTCTTTGCCTATCCATCTTGTGCACTAAGGTTAGATAATGCTCCAACAACTCGCTTCACACCAGAAACCATTTATGTCTACACCTATGGTCGCTTCTCCATCCGCAAAGCCTTTTCGCAATCTCGTAAATTCCTGCACTTAATTGACACATATCTTAAACGGCGGTCCACATTATCAACCGCCGCTATTCGGGCTCTGGAAGATTGCAATTCACTAACTGATCTCAACGTGGACTATCTTTCAAGCTGCTTTCAAACTCTCAATACTACTAGAGAAATTCTACCTGCCATGCAAGCTGATGACGTGCAAACTCGGCTTAGTGCTGTGTTAACAAACCAGCAA…	MASKLFFLIRAFPILLALPFFAYPSCALRLDNAPTTRFTPETIYVYTYGRFSIRKAFSQSRKFLHLIDTYLKRRSTLSTAAIRALEDCNSLTDLNVDYLSSCFQTLNTTREILPAMQADDVQTRLSAVLTNQQTCLDGLQAAANSAESIKNGVSVPLFEDTKLSSVLLALVRKGWVGRKKKVTITRHPTRTQRLFGKDRHGHLPLIMSDENRAIYESLSGRKLKSDDGGVLVTKIVTVSQDGKAKFSTINDAITAAPNNTDVTDGYFLIYIKEGVYQEYISIAKNKKILMMIGDGIGKTIITGDRNFVDGWTTFNSATFAVMAPNFVAVDISFRNTAGPSKHQAVALRSGADLSTFYSCSFEGYQDSLYTHSQRQFYRECDIYGTIDFIFGNAAVVLQN…	3	45946907	45948822	-1								Cs5g33400.1	96.4
CitPME17	Ciclev10023718m	GATAATGTTGATCCACCAACAACTCCTGTCCCACCAGAAACTATTTGCATGTACACTCCAAAACCTAAAGATTGCAAATCGGTGCTCCCTGCTACCCCTAACCAAACCGCAGATACCTACACATATTGTCGATTATCCATCCGCAAAGCTTTATCGCAAACTCAAAAATTCTTCAACTTAGTTGACAATTATCTTAAATCCGGATCCACATTACCACTCAGTGCAATCCGCACTCTAGATGATTGCCGTTTACTAGCTGGTCTCAACTTGGACTATCTTTCAAGCTCTTATCAAGCTGCCAACACCACTAGCCGAATTCTGAAAACCATCCAAGCTGATGACGTGCAAGCTCAGCTTAGTGCCATCTTAACGAACCAAAATACCTGTTTAGATGACATT…	DNVDPPTTPVPPETICMYTPKPKDCKSVLPATPNQTADTYTYCRLSIRKALSQTQKFFNLVDNYLKSGSTLPLSAIRTLDDCRLLAGLNLDYLSSSYQAANTTSRILKTIQADDVQAQLSAILTNQNTCLDDIQDSALSESVKNGLSVPLLEDIKLSSVLLALFRKGWVGEKKIVTSWQPSKTQSMFGHNGRLPLIMSDRIRAIYDSVRGRKLTGGDEGVLVIDIVTVALDGTGNFSTITDAINVAPNNTNPDNGYFLIYVTAGVYQEYISIPKNKKNLMMIGDGINQTIITGNRNVVDGWTTSNSATFIVVAPNFVASDITIRNTAGAVKHQAVALRSAADLSTFYSCSFEGYQDTLYTHSLRQFYRECDIYGTVDFIFGNAAVVLQNCNIYPRLPMS…	3	45953673	45955419	-1	EST callus Navel|FGENESH	ATGGCTTCAAAGCTCTTTTTTCTCATAACAATACCTATTCTCATTGCCCTTCCTTTTTTTGCCTATCCATCTTATGCAGCAGATAATGTTGATCCACCAACAACTCCTGTCCCACCAGAAACTATTTGCATGTACACTCCAAAACCTAAAGATTGCAAATCGGTGCTCCCTGCTACCCCTAACCAAACCGCAGATACCTACACATATTGTCGATTATCCATCCGCAAAGCTTTATCGCAAACTCAAAAATTCTTCAACTTAGTTGACAATTATCTTAAATCCGGATCCACATTACCACTCAGTGCAATCCGCACTCTAGATGATTGCCGTTTACTAGCTGGTCTCAACTTGGACTATCTTTCAAGCTCTTATCAAGCTGCCAACACCACTAGCCGAATT…	MASKLFFLITIPILIALPFFAYPSYAADNVDPPTTPVPPETICMYTPKPKDCKSVLPATPNQTADTYTYCRLSIRKALSQTQKFFNLVDNYLKSGSTLPLSAIRTLDDCRLLAGLNLDYLSSSYQAANTTSRILKTIQADDVQAQLSAILTNQNTCLDDIQDSALSESVKNGLSVPLLEDIKLSSVLLALFRKGWVGEKKIVTSWQPSKTQSMFGHNGRLPLIMSDRIRAIYDSVRGRKLTGGDEGVLVIDIVTVALDGTGNFSTITDAINVAPNNTNPDNGYFLIYVTAGVYQEYISIPKNKKNLMMIGDGINQTIITGNRNVVDGWTTSNSATFIVVAPNFVASDITIRNTAGAVKHQAVALRSAADLSTFYSCSFEGYQDTLYTHSLRQFYRECDI…	3	45953673	45955500	-1	Cs5g33410.1	100
CitPME18	Ciclev10020108m	ATGGACTTTCTTTTAAGCTCCTTTGAAACTGTCAATTCTACTAGTAAAACTTTACCCACCATGCAAGCGGATGACGTGCAGACTTTCCTTAGTGCCATTCTAACAAACCAGCAAACCTGTTTTGATGGCTTACAAGACACGGCTTCCGCTTGGAGCGTCAAGAATGGTCTCTCACTCCCTCTTTCCAACGACACAAAACTCTACAGTGTGTCTCTTGCTCTTTTCACAAAAGCTTGGGTCCCTAAGAAGAAGAAAGCAACCGCATGGCAGCCCACAAGGAAGCAACGTCTGTTCCGGAACGGACGGCTACCGTTGAAAATGTCTGAAAAAACACGTGTAGTTTATGAGACTGTAAGCAGAAGAAAACTTCTCCAAGCTGCTCCGGATGATGAAGTCTTG…	MDFLLSSFETVNSTSKTLPTMQADDVQTFLSAILTNQQTCFDGLQDTASAWSVKNGLSLPLSNDTKLYSVSLALFTKAWVPKKKKATAWQPTRKQRLFRNGRLPLKMSEKTRVVYETVSRRKLLQAAPDDEVLVSDIVTVSQDGSGNFTTITDAINVAPNNTDVTNGYFLIYITAGVYEEYISISKNKKNLMIIGDGINQTVITGNRSVVDGWTTFNSATFAVVAPNFVAVNITIRNTAGAIKHQAVALRNGADLSTFYSCSFEAYQDTLYTHSLRQFYRECDIYGTVDFIFGNAAVVLQNCNIYPRLPMSGQFNAITAQGRTDPNQNTGTSIHNCTIRASSDLASGSQTVQTYLGRPWKEYSRTVYMQSFMDSSINPAGWQIWSGDFALSTLYYAEYN…	3	45960592	45962333	-1	aC34209C10EF_c|FGENESH	ATGGCTTCAAAGCTCTTCTTTGTCATAACAATACCTATTCTTATTGCACTTCTTCCTGTCTTTGCTCGTCCATCACATGCAACAGATGTCGCTCCAACGACTCCTGTTTCAGCTGGATCGGTTTGCAAATCCACTCCGGACCCATCCTTTTGCAAATCCGTGCTCCCTAACCAAACTGCAAATGTCTACACCTACGGCCGATTCTCCATTCGCAAAGCTTTATGGCAATCTCGTAAATTCTTGAACCTAGTTGACAAATATCTCACCCGCCGCGCCACATTATCAACTACTGCCATACGTGCTCTAGAGGATTGCCGTTTACTAGCTGGTTTCAACATGGACTTTCTTTTAAGCTCCTTTGAAACTGTCAATTCTACTAGTAAAACTTTACCCACCATG…	MASKLFFVITIPILIALLPVFARPSHATDVAPTTPVSAGSVCKSTPDPSFCKSVLPNQTANVYTYGRFSIRKALWQSRKFLNLVDKYLTRRATLSTTAIRALEDCRLLAGFNMDFLLSSFETVNSTSKTLPTMQADDVQTFLSAILTNQQTCFDGLQDTASAWSVKNGLSLPLSNDTKLYSVSLALFTKAWVPKKKKATAWQPTRKQRLFRNGRLPLKMSEKTRVVYETVSRRKLLQAAPDDEVLVSDIVTVSQDGSGNFTTITDAINVAPNNTDVTNGYFLIYITAGVYEEYISISKNKKNLMIIGDGINQTVITGNRSVVDGWTTFNSATFAVVAPNFVAVNITIRNTAGAIKHQAVALRNGADLSTFYSCSFEAYQDTLYTHSLRQFYRECDIYGT…	3	45960592	45962418	-1	Cs5g33420.1	99.8
CitPME19	Ciclev10023723m	ATGGGTAGGGCCCACGGAGTGGGATTCCCACTCCCTTCCCATTTAGATGAAGTAAACGCTGGAGTGGGAGGAATCCACACTCCTCACTCCCACTCCAGCAATTCAGCTATTTTCTTGCTACTATTTGTACTATCAGCTGTAAGTGTAACCACCCTAAAAAAGAACCCCAAAACAACAGATGCCCCACACTTGCGAGTCCATAAACATTTCCAGGTTGCTCATTCCGCATGCGAAGGCACACTCTATCCTGAACTCTGCGTTTCGACTCTGCTTTCAGTCCCAGATCTCGCTTCAAAAAGAGTCCCTGAACTCATCTCCGTAACCATAAACCGCACATTGTCCGAGCTGAGAGCCTCCTCCTCAAACTGCTCCAGCATTGGACAGAGTTACCCAAATTTT…	MGRAHGVGFPLPSHLDEVNAGVGGIHTPHSHSSNSAIFLLLFVLSAVSVTTLKKNPKTTDAPHLRVHKHFQVAHSACEGTLYPELCVSTLLSVPDLASKRVPELISVTINRTLSELRASSSNCSSIGQSYPNFNTLEKRAINDCLELFHDTIVELKSALNDLSPKKLPSKHYHDLQTLFSGAMTNQYTCLDGFAYSDGNVRDVIKSSLYNISRHVSNSLVMLKKIPGDNMSSKYEVFPEYGRIKRGFPTWLSLNDRKLLQKSVNLTKFDLIVAKDGSGNFTTITEAVEAAPNKSNTRFVIYIKAGAYFENVEVDKKKTMLMFVGDGIGKTVVKANRSVVDGWTTFRSATVAVVGTGFIAKGITVENSAGPSKHQAVALRSGSDLSAFYKCSFVGYQDTL…	3	45988658	45993348	1	aCL4489Contig1	ATGTATAGTCCCACTCCCAGTCCCAGGCGAGGAACCAGACTCTTACTTGCTCTCTTACCCAGTTCAGCTATTTTCTTGCTACTATTTGTACTATCAGCTGTAAGTGTAACCACCCTAAAAAAGAACCCCAAAACAACAGATGCCCCACACTTGCGAGTCCAAAAACATTTCCAGGTTGCTCATTCCGCATGCGAAGGCACACTCTATCCTGAACTCTGCGTTTCGACTCTGCTTTCAGTCCCAGATCTCGCTTCAAAAAGAGTCCCTGAACTCATCTCCGTAACCATAAACCGCACATTGTCCGAGCTGAGAGCCTCCTCCTCAAACTGCTCCAGCATTGGACAGAGTTACCCAAATTTTAACACCCTTGAAAAGAGAGCAATCAATGACTGTCTCGAG…	MYSPTPSPRRGTRLLLALLPSSAIFLLLFVLSAVSVTTLKKNPKTTDAPHLRVHKHFQVAHSACEGTLYPELCVSTLLSVPDLASKRVPELISVTINRTLSELRASSSNCSSIGQSYPNFNTLEKRAINDCLELFHDTIVELKSALNDLSPKKLPSKHYHDLQTLFSGAMTNQYTCLDGFAYSDGNVRDVIKSSLYNISRHVSNSLVMLKKIPGDNMSSKYEVFPEYGRIKRGFPTWLSLNDRKLLQKSVNLTKFDLIVAKDGSGNFTTITEAVEAAPNKSNTRFVIYIKAGAYFENVEVDKKKTMLMFVGDGIGKTVVKANRSVVDGWTTFRSATVAVVGTGFIAKGITVENSAGPSKHQAVALRSGSDLSAFYKCSFVGYQDTLYVHSLRQFYRECD…	3	45990382	45993348	1	Cs5g33450.1	100
CitPME20	Ciclev10024124m	TTGGATTGTAAATTGAATAATGCCAATCCACTTAAAGTGGCGTATACCATTAGTGTATCTCGTTCTGGTGGGGGAAACTTCACAAAGATTCAAGATGCCATCAACTTCATTCCTGTCAACAACGATCAGTGGATACGCATTCAAATTTCTCCTGAAATATATCAGGAAAAAGTTACAATTCCACAGAACAAACCATGCATTTTTCTTGAAGGAGCAAGCAGTAGAACCACAAAAATCCAATGGGGCGACCATGACACGACCATCAGTAGCCCTACTTTCACTTCCCTTTCCGAAAATGTAGTTGCTAAGGGCATTTTGTTTCAGAATACGTATAACGTGCCGCCTAGCTACCGCCAGAACCAAGAGAGAATGGAAGTAAAACAAGCTTTGGCTGCAAGA…	LDCKLNNANPLKVAYTISVSRSGGGNFTKIQDAINFIPVNNDQWIRIQISPEIYQEKVTIPQNKPCIFLEGASSRTTKIQWGDHDTTISSPTFTSLSENVVAKGILFQNTYNVPPSYRQNQERMEVKQALAARISGDKSAFYNCGFAGLQDTLFDDHGRHYFHQCYIEGAIDFIFGNGQSIYHNCAVNVTLKEYLPEKDYGYITAQGRNSTDDPSGFVFTSCQFLGSGKAYLGRAYGAFSRVIIVNSVLTDMVEPQGWNAWNHVEHEENIEYAEARCRGAGADTSKRVSWEKHLSVDEVKKFTDSSFIDHDGWIAKLPSVL*	3	46641581	46643048	-1	Phytozome v10.2|C. sinensis	ATGTACTATTTAAATTCATTTTTGTTTGCTGTAACATTGTTATTGCTTTCTTCCAATGTCTCCACAGCTTTGGATTGTAAATTGAATAATGCCAATCCACTTAAAGTGGCGTATACCATTAGTGTATCTCGTTCTGGTGGGGGAAACTTCACAAAGATTCAAGATGCCATCAACTTCATTCCTGTCAACAACGATCAGTGGATACGCATTCAAATTTCTCCTGAAATATATCAGTAAAAACCTATTTATATATATAATCACACACATTCATATATACACGAGTACATTTGTACGAGCTTCATCATGTCAATTCGTTAATTTATTTATTTCGAGAGGTGTGTGTTGTTTGTTATACGTATATACAGGGAAAAAGTTACAATTCCACAGAACAAACCATGC…	MYYLNSFLFAVTLLLLSSNVSTALDCKLNNANPLKVAYTISVSRSGGGNFTKIQDAINFIPVNNDQWIRIQISPEIYQEKVTIPQNKPCIFLEGASSRTTKIQWGDHDTTISSPTFTSLSENVVAKGILFQNTYNVPPSYRQNQERMEVKQALAARISGDKSAFYNCGFAGLQDTLFDDHGRHYFHQCYIEGAIDFIFGNGQSIYHNCAVNVTLKEYLPEKDYGYITAQGRNSTDDPSGFVFTSCQFLGSGKAYLGRAYGAFSRVIIVNSVLTDMVEPQGWNAWNHVEHEENIEYAEARCRGAGADTSKRVSWEKHLSVDEVKKFTDSSFIDHDGWIAKLPSVL*	3	46641581	46643117	-1	orange1.1t01706.1	100
CitPME21	Ciclev10024027m	ATGGCTTCAAAATCCTATTTTCAATTCATTCTCTTCCTTCTTTCTTTGTCAAATTTTAGTCTCAAATGTTGTTCATTAAGGAATGTAGATAAAGAAACGGATTTCAACAAATGGGTCTCGTGGAACATCCAAAATCATCAAAAGAAGGCTCTGTGGCAAGCAGAGTCAGTCAGCCAACAAGTTCCTGGAGCTGGTGGCAGGGTTCTTGATGGCAAACTGTGGAAGGCTGAAACGAACAAAGTGAGAATAACTGTTTGTCAGAATGGGACTGGAGATTTTAAAACCATCAGGGAAGCAATTAAGAGCATTCCACCGTACAACACCAGGAGAGTTATACTGGAGATCAAACCAGGTGTTTACAGGGAAAAAGTTAGCATCCCAAAAACGTTGCCGTTTGTT…	MASKSYFQFILFLLSLSNFSLKCCSLRNVDKETDFNKWVSWNIQNHQKKALWQAESVSQQVPGAGGRVLDGKLWKAETNKVRITVCQNGTGDFKTIREAIKSIPPYNTRRVILEIKPGVYREKVSIPKTLPFVTFLGNSSDPPTITGNDTASVPGSDGKPLKTFQSATVAVDADYFVAINMKFQNTAPHVVGSMGEQAVALRISGTKAAFYNCSFYGAQDTLYDHKGLHYFNNCFIQGSVDFIFGYGRSLYENCYLNSTAKKKASLTAQKRSSSSIDSGFSFKNNVVTGSGLVYLGRAWGDYSRVVFSFTFMDKIVLPQGWSDWGDQKRDTRVFYGEYKCSGPGANLTGRVPWARILTDEEAKPFIGT*	3	46777711	46780178	-1								orange1.1t01727.1	95.5
CitPME22	Ciclev10024598m	ATGTCCTCATTCATCACCACCAAAATGTCCATTTCTCTCCCCACCTTTCTCCACCTCCTACTCCTAGCCATGGCTCTCACCACCACCTCTTGCACCGACCAGCTGGCCGCGGTTCAATCGGTCCGAGCTGCGGCGTTGCAGGCTAGGAACTGGGCTCGGGCTTCCATTGCACCAAATGGATTAGATGAGTCAAGGCTCGCAAGCTTGCTCCACCTTGCTAGCGATAATTACACTACTGATGATGCTCGTACGTGGCTGAGTAGCTCGCTCGCTTGCCGCAGGACTTGTTTGGAAGGCTTGGAAGAGAAGGGGCGTGCTCAGACCCATGCAAGGGCTCACAATTTGACTGTGTTGCTTGGTGAATCTTTGAACTTGCATGCGAGGGGTAGGGGTTTTAGA…	MSSFITTKMSISLPTFLHLLLLAMALTTTSCTDQLAAVQSVRAAALQARNWARASIAPNGLDESRLASLLHLASDNYTTDDARTWLSSSLACRRTCLEGLEEKGRAQTHARAHNLTVLLGESLNLHARGRGFRKGRFSWHSQNNQRSMNNTMFVGDGIDRTIVTGHRNVPDGSTTSSPATFGVSGDGFWARDMTFENTAGPQKHEAVALRVSSDLSMFYRCSFKDYQDTLFTLSLRQFYRDCQIYGTIDFIVGDAAAVFQNFDIFVRRPMHDQSNMVTAQGRDNPNENTGISIEGSRIRPAADLAATDLDGIIHPEGWIEWDGNFALSTLYYAEYLNAGLGAATANRVKWPGFHVLNNPQQAAPFTVTGFIQGDSWIPATGVPFWLGI*	3	49886609	49890517	-1								orange1.1t00215.1	48.2
CitPME23	Ciclev10019773m	ATGGCTCTTCGAATTCTTATAACTGTCTCACTTGTGCTCTTTTCTCTCTCTCATACCTCTTTTGGGTACAGCCCAGAAGAAGTAAAATCGTGGTGTGGCAAAACGCCAAACCCTCAACCATGCGAGTATTTTTTGACACAAAAAACTGATGTCACTTCCATCAAACAAGACACTGACTTTTACAAAATTTCATTACAGCTTGCACTAGAACGTGCCACGACAGCCCAATCACGCACGTATACCCTTGGCTCAAAGTGCCGAAACGAGCGTGAAAAGGCTGCATGGGAAGATTGCCGCGAGCTTTATGAACTAACAGTTCTTAAGCTCAACCAAACCTCCAACTCTAGCCCTGGATGCACCAAAGTTGACAAACAAACATGGCTTAGCTCGGCTCTTACA…	MALRILITVSLVLFSLSHTSFGYSPEEVKSWCGKTPNPQPCEYFLTQKTDVTSIKQDTDFYKISLQLALERATTAQSRTYTLGSKCRNEREKAAWEDCRELYELTVLKLNQTSNSSPGCTKVDKQTWLSSALTNLETCRASLEDLGVPEYVLPLLSNNVTKLISNALSLNKVPYNEPSYKDGFPTWVKPGDRKLLQTTPRANIVVAQDGSGNVKTIQEAVAAASRAGGSRYVIYIKAGTYNENIEVKLKNIMFVGDGIGKTIITGSKSVGGGATTFKSATVAVVGDNFIARDITIRNTAGPNNHQAVALRSGSDLSVFYRCSFEGYQDTLYVHSQRQFYRECDIYGTVDFIFGNAAVVLQNCNIFARKPPNRTNTLTAQGRTDPNQNTGIIIHNCRVTA…	3	49898591	49901084	1	aCL1069Contig1|CsPME3							orange1.1t00214.1	100
CitPME24	Ciclev10031872m	ATGACTCATCATGTGGCAGCTGTTTTCACATTCATAATCTTCATCATCAACCACCTTGCAAACTCTGCCAATGGCGGCGGCGGCGGCGATGGGGCTGTGATTCCACCGGAGAAGTCACAAATAGAGAGCTGGTTTACTGCCAACGTTAAGCCTTACACTGAGAGAAAAACAACTCTGGATCCTGCACTCTCTACGGCTCAGGCTGGCCAGCGTGTGATCAAGGTGAATCAAGATGGAAGCGGCGAATTCAAGACCATAAATGATGCCATTAATAGCATACCTCAAGGGAACACCAAGCGTGTCATTTTATCAATTGGTGCCGGGGAATATGTTGAGAAGATTAAGATTGATCGATCTAAACCCTTTATTACTTTTTACGGATCGCCTGATGCTATGCCG…	MTHHVAAVFTFIIFIINHLANSANGGGGGDGAVIPPEKSQIESWFTANVKPYTERKTTLDPALSTAQAGQRVIKVNQDGSGEFKTINDAINSIPQGNTKRVILSIGAGEYVEKIKIDRSKPFITFYGSPDAMPNVTFGGTAKEYGTVDSATLIVESDYFMAVNIIIANSSPRPDGKREGAQAVALRISGTKAAFYNCKIIGFQDTLCDDRGNHFFKDCHIQGTVDFIFGSGKSLYLSTELRAMGDTGLTVITAHARESESEDNGFAFVHCTIEGSGNGTYLGRAWKNSPRVVYAYTTMGNVVNRAGWSDNFRPERRQTVFYGEYKCSGPGASPAERVEYTKQLSDAEARPFLVLDYVQGNQWILPPPAKV*	4	14661692	14663367	1	aCL1451Contig1							Cs7g19180.1	99.7
CitPME25	Ciclev10003723m	CAAATTACACAAAGAATTGATGTGATTGTGGCACAAGATGGCTCAGGCAACTACACAAAAATTTCAGATGCTATCTTGGCTGCTCCTTCATTCCGTCGAAAACCCTATTATATAAAAATTAAAGAAGGAAACTACACTGAATATGTTGTGGTTGGCAGAGAGAAAACGAATTTGGTGTTAATTGGCAATGGAATCAACAACACAATCATTTCCGGGAATAAAAGCCACGGAAAGGATCATTTATCCACTTACCAGACTGCTACTGTTGCGATTAAAGTGGCTGGATTTGTGGCAATGAATATAACATTTGAGAACACAGCCGGACCAGACCAGGAAACAGGCCAGGCAGTAGAATTAGTAAGTGAAGTGGACTCTGCCTTCTACAGGTGCAAGCTTGAT…	QITQRIDVIVAQDGSGNYTKISDAILAAPSFRRKPYYIKIKEGNYTEYVVVGREKTNLVLIGNGINNTIISGNKSHGKDHLSTYQTATVAIKVAGFVAMNITFENTAGPDQETGQAVELVSEVDSAFYRCKLDGYQDTLYAKSNKQFYRECDIYGTIDFIFGDASAVFQNCNIYVRFLGGNVKTITAEGREKPEGNGGIIIHNCTITAAEDFSENRTSIKTYMGRPWRNYSRTVILQTFLDEIIDPEGWLEWQGQSVDTIYYAEYNNRGRGSKTTGRVRWKGFRIIKRLEAENFTVKKFISGNKWIPSTGIPIFPGLL*	5	4706100	4707213	-1	FGENESH	ATGGCGTGGCTAATTATAATCCTTTTAACTCTCTGTTGCCATATGTCTCAAGGACAAATTACACAAAGAATTGATGTGATTGTGGCACAAGATGGCTCAGGCAACTACACAAAAATTTCAGATGCTATCTTGGCTGCTCCTTCATTCCGTCGAAAACCCTATTATATAAAAATTAAAGAAGGAAACTACACTGAATATGTTGTGGTTGGCAGAGAGAAAACGAATTTGGTGTTAATTGGCAATGGAATCAACAACACAATCATTTCCGGGAATAAAAGCCACGGAAAGGATCATTTATCCACTTACCAGACTGCTACTGTTGCGATTAAAGTGGCTGGATTTGTGGCAATGAATATAACATTTGAGAACACAGCCGGACCAGACCAGGAAACAGGCCAG…	MAWLIIILLTLCCHMSQGQITQRIDVIVAQDGSGNYTKISDAILAAPSFRRKPYYIKIKEGNYTEYVVVGREKTNLVLIGNGINNTIISGNKSHGKDHLSTYQTATVAIKVAGFVAMNITFENTAGPDQETGQAVELVSEVDSAFYRCKLDGYQDTLYAKSNKQFYRECDIYGTIDFIFGDASAVFQNCNIYVRFLGGNVKTITAEGREKPEGNGGIIIHNCTITAAEDFSENRTSIKTYMGRPWRNYSRTVILQTFLDEIIDPEGWLEWQGQSVDTIYYAEYNNRGRGSKTTGRVRWKGFRIIKRLEAENFTVKKFISGNKWIPSTGIPIFPGLL*	5	4706100	4707267	-1	orange1.1t01921.1	98.2
CitPME26	Ciclev10003299m	AAAATTACACAAAGAATTGATGTGATTGTGGCACAAGATAGCTCAGGCAACTACACAAAAATTTCAGATGCTATCTTGGCTGCTCCTTCATTCAGTCGAAAACCCTATTATATAAAAATTAAAGAAGGTAACTACACTAAATATGTTGTTGTTGGCAGAGAGAAAACGAATTTGGTGTTAATTGGCAATGGAATCAACAACACAATCATTTCCGGGAATAAAAGCCACGGGAATGGTCATTTATCAACTTACCAGACTGCTACAGTTGCGATTAAAGGGCCTGGATTTGTGGCAATGAATATAACGTTTGAGAACACAGCCGGACCAGACCAGGAAACAGGCCAGGCAGTAGCATTACTGAGTGAAGTAGATTCTGCCTTCTACCGGTGCAAGTTTGTT…	KITQRIDVIVAQDSSGNYTKISDAILAAPSFSRKPYYIKIKEGNYTKYVVVGREKTNLVLIGNGINNTIISGNKSHGNGHLSTYQTATVAIKGPGFVAMNITFENTAGPDQETGQAVALLSEVDSAFYRCKFVGYQDTLYAGRNKQFYRECDIYGTIDFIFGDASAVFQNCNIYVRFLGGNVKTITAEGREEPEGNGGIIIHNCTITAAEDFPKDRTSIKTYLGRPWRNYSRTVILQTFLDEIIDPEGWLEWQGQSVDTIYYAEYNNRGPGSNTTGRIRWKGYRILKRLEAENFTVKKFISGDKWIPSTGIPFFPGLL*	5	4751734	4752845	-1	FGENESH	ATGGTGGAAGGTATTGAGGCCTGTGAGTTCCTGATCAAACCTGCTGGCAGATTTGGAAAAATTACACAAAGAATTGATGTGATTGTGGCACAAGATAGCTCAGGCAACTACACAAAAATTTCAGATGCTATCTTGGCTGCTCCTTCATTCAGTCGAAAACCCTATTATATAAAAATTAAAGAAGCGATTAAAGGGCCTGGATTTGTGGCAATGAATATAACGTTTGAGAACACAGCCGGACCAGACCAGGAAACAGGCCAGGCAGTAGCATTACTGAGTGAAGTAGATTCTGCCTTCTACCGGTGCAAGTTTGTTGGGTATCAGGACACTCTTTATGCTGGAAGAAATAAACAGTTCTATCGAGAGTGTGATATCTATGGTACAATAGATTTTATATTC…	MVEGIEACEFLIKPAGRFGKITQRIDVIVAQDSSGNYTKISDAILAAPSFSRKPYYIKIKEAIKGPGFVAMNITFENTAGPDQETGQAVALLSEVDSAFYRCKFVGYQDTLYAGRNKQFYRECDIYGTIDFIFGDASAVFQNCNIYVRFLGGNVKTITAEGREEPEGNGGIIIHNCTITAAEDFPKDRTSIKTYLGRPWRNYSRTVILQTFLDEIIDPEGWLEWQGQSVDTIYYAEYNNRGPGSNTTGRIRWKGYRILKRLEAENFTVKKFISGDKWIPSTGIPFFPGLL*	5	4751734	4753485	-1	orange1.1t01921.1	79.2
CitPME27	Ciclev10003835m	CAAATTACACAAAGAATTGATGTGATTGTGGCACAAGATGGCTCAGGCAACTACACAAAAATTTCAGATGCTATCTTGGCTGCTCCTTCATTCCGTCGAAAACCCTATTATATAAAAATTAAAGAAGGAAACTACACTGAATATGTTGTGGTTGGCAGAGAGAAAACGAATTTGGTGTTAATTGGCAATGGAATCAACAACACAATCATTTCCGTGAATAAAAGCCACGGAAAGGATCATTTATCCACTTACCAGACTGCTACTGTTGCGATTAAAGGGGCTGGATTTGTGGCAATGAATATAACATTTGAGAACACAGCCGGACCAGACCAGGAAACAGGCCAGGCAGTAGAATTAGTAAGTGAAGTGGACTCTGCCTTCTACAGGTGCAAGCTTGAT…	QITQRIDVIVAQDGSGNYTKISDAILAAPSFRRKPYYIKIKEGNYTEYVVVGREKTNLVLIGNGINNTIISVNKSHGKDHLSTYQTATVAIKGAGFVAMNITFENTAGPDQETGQAVELVSEVDSAFYRCKLDGYQDTLYAKSNKQFYRECDIYGTIDFIFGDASAVFQNFNIYVRFLGGNVKTITAEGREKPEGNGGIIIHNCTITAAEDFSENRTSIKTYMGRPWRNYSRTVILQTFLDEIIDPEGWLEWQGQSVDTIYYAEYNNRGRGSKTTGRVRWKGFRITKRLEAENFTVKKFISGNKWIPSTGIPIFPGLL*	5	4831015	4832128	-1	FGENESH	ATGGCGTGGCTAATTATAATCCTTTTAACTCTCTGTTGCCATATGTCTCAAGGACAAATTACACAAAGAATTGATGTGATTGTGGCACAAGATGGCTCAGGCAACTACACAAAAATTTCAGATGCTATCTTGGCTGCTCCTTCATTCCGTCGAAAACCCTATTATATAAAAATTAAAGAAGGAAACTACACTGAATATGTTGTGGTTGGCAGAGAGAAAACGAATTTGGTGTTAATTGGCAATGGAATCAACAACACAATCATTTCCGTGAATAAAAGCCACGGAAAGGATCATTTATCCACTTACCAGACTGCTACTGTTGCGATTAAAGGGGCTGGATTTGTGGCAATGAATATAACATTTGAGAACACAGCCGGACCAGACCAGGAAACAGGCCAG…	MAWLIIILLTLCCHMSQGQITQRIDVIVAQDGSGNYTKISDAILAAPSFRRKPYYIKIKEGNYTEYVVVGREKTNLVLIGNGINNTIISVNKSHGKDHLSTYQTATVAIKGAGFVAMNITFENTAGPDQETGQAVELVSEVDSAFYRCKLDGYQDTLYAKSNKQFYRECDIYGTIDFIFGDASAVFQNFNIYVRFLGGNVKTITAEGREKPEGNGGIIIHNCTITAAEDFSENRTSIKTYMGRPWRNYSRTVILQTFLDEIIDPEGWLEWQGQSVDTIYYAEYNNRGRGSKTTGRVRWKGFRITKRLEAENFTVKKFISGNKWIPSTGIPIFPGLL*	5	4831015	4832182	-1	orange1.1t01921.1	97.6
CitPME28	Ciclev10003954m	ATGAATATAATCAAATTGATTGTGTCAGCATTTTATGCCACGCTTATTGTGAGTTCCATCATCGTAGTCCTTGTTGCTGTTACCACTAAGCACGATGACAATGTCAACTGGGAAGCGAAAAAATCACCATTAAGGAAGGCAGTGAACCAATTATGCGCACCAACGAGCTTCACGGATCTATGCATTGAAACCCTAAACAGAGCAAATACATCTGACCCGAAGGAGCTTATTAAGGCCATGATCATAAGGTCCCACGAAGCCATTGCGAAATTGCATGAGTTAGCTGATTCAATGGCCAAAGAGTTAGCCAATGTGAACGACACGTATGATCAGAGGAGTGACTTGGGTGATTGCATGGAAATGCTGCAACTGTGTATGGTTGATCTTCAGAAAACTGTG…	MNIIKLIVSAFYATLIVSSIIVVLVAVTTKHDDNVNWEAKKSPLRKAVNQLCAPTSFTDLCIETLNRANTSDPKELIKAMIIRSHEAIAKLHELADSMAKELANVNDTYDQRSDLGDCMEMLQLCMVDLQKTVDIIEANQLDTLSYQADEIMPKLNAVITFQKACLAGFKRKSRPQKENLTGPMQESRQLGSIALTTIYELPRHLHYFNMEERILPPGFLKPFQTGEVYKFPPWFSTANRELLAIPKEMLTPSAVVAQDGTGQFYTIGSALHSYPDDIKEGMIYAIYVKAGLYEEQVTIKYYHRNVFIYGDGNTKTFVVLHQPILERIGRSIENSATVSVMAEGFMAREIGIISNFGPDARRANALYVRADKAVFVDCRIDGYQRTLVAQAYRQFYLNC…	5	18206357	18208321	1								Cs1g05720.1	99.8
CitPME29	Ciclev10000705m	ATGAAGTGCCATTCCGTAGCCATTTTATTCTTCTTCTCCTTCTCACTCCTCTTTCTTTGTTGTTTATCTCAAAACTCCACACAAACACAATCACCTTCCATTGCATGCAAATCAACTCCATATCCAAAGCTTTGCCGTTCGATCCTCTCCGCTTTCAAATCCTCACCGTCCAGCCCTTACAACTACGGCAAGTTCTCAGTCAAACAATGCACGAAACAAGCACAAAAGCTCTCCAAAACCATCAGGCATTACCTCACCCACGAGAAGCAACGGTCCCGATTCAGCCACGCGGAGGCCGGGGCTCTGACCGACTGCGGGGAGCTGATGGAACTGAACGTTGACTACTTACGTTCGATTTCTGGGGAGCTGAAGGAGGCTGAGTCGATGACGGATGAATTC…	MKCHSVAILFFFSFSLLFLCCLSQNSTQTQSPSIACKSTPYPKLCRSILSAFKSSPSSPYNYGKFSVKQCTKQAQKLSKTIRHYLTHEKQRSRFSHAEAGALTDCGELMELNVDYLRSISGELKEAESMTDEFVDRVTSLLSGIVTNQQTCFDELVDSKSGIAAVLYEPLSNVTRLYSVSLGLVTHALDRNLRRNKKRSKRSKNWFLKNTNRFREPLETLIKDIRKAPCHDCHKGERNLGEVESNGILVNQSVIVSPHGTDNFTTIGDAIAFSPNNSKPEDGYFVIYAREAVYEEYVVVPKHKKNLLLIGDGINRTVITGNHSVIDGWTTFNSSTFAVSGERFVAVDVTFKNTAGPAKHQAVALRNNADLSSFYRCSFEGYQDTLYVHSLRQFYRECDI…	5	24070763	24075158	-1	aCL3119Contig1							Cs3g06900.1	100
CitPME30	Ciclev10003818m	ATGTCTTCCTTCAGATCATACGGCAAGGTCGACGAGGCTGATCTGCATGCGAGGCTCGAAGCTCGCCGGAGAACTAGACGAAGGATCGCCATCGTTTCCCTCTCTTCCATCGTTCTTGTTGCCGTCATTGTCGCCGCCGTTGTGGGAATCACTCGCAACACTGATTCTGATCGAGTTGAGGCCGAAAATAATGGCCGTGGACGTGTCATTTCTACTGCCATTAAAGCTGTTTGCGATGTCACGATGTACAAGGACACTTGTTATGATAGTCTCAGTAAGGGGGCTAGTAATTCAAGCCAAATTCAGCCTGAAGAGTTGTTTAAGCTGGCCATCAAAGTGGCCTCCAACGAGCTTTCGAAAGCATCTGATAAATTTTTCTCGGACCATAATGGAACGTCT…	MSSFRSYGKVDEADLHARLEARRRTRRRIAIVSLSSIVLVAVIVAAVVGITRNTDSDRVEAENNGRGRVISTAIKAVCDVTMYKDTCYDSLSKGASNSSQIQPEELFKLAIKVASNELSKASDKFFSDHNGTSDDNNNNNNIMFLDALGNCRELLSMAWDSLDSSLSSGKSVSDAVNDLKTMLSSAGTYQETCIDGLEEAKPGFRARVLEYLRNSTEMTSNALAILTGISKVESSLKLRRLLGEPPHEWLRPEDRKLLQSPAENWKKNANAVVGKDRFAKYKTINDALRAVPDKSKKKFIIYVKKGVYVENVRIEKPKWNVVMIGDGMNETIVSGHRNFIDGTPTFSTATFAVFGQGFVARDMGFRNTAGPSKHQAVALMSTADHSVFHRCQFDAYQDT…	5	24092625	24094663	-1								Cs3g06920.1	100
CitPME31	Ciclev10000415m	ATGCATCAAGAGGATGTTGAGAAAATCGGAAAAAACAGGATCGCCTTTGTCATGTTCGCGTCGATATTCCTCGTTGTCATGGTGGTTGTGGCGACAGTTTCCATTGGCCGCCGGCCTAATAATGGCAAATCCGAAGTTGATGTCAGTTCACAATCTCATGACCAAGTATCAGCCTCAATGAAGGCCATCAAAACCGTTTGCCAACCCACAGACTATCAAAAGCAATGCGTCGAGAGTCTCCAGACAGAGTCGGGAAACACGACAGACCCTAAAGAACTCATTAGGGCAGCATTTCAAGTCGCCAAGAAACATGTAGCAGCAGCTGCAAAGAGATCAAGAACCCTGAAACAACTCGAAAAGGACCCCAGAGCAAGCCTGGCTCTCGAGGACTGCAACGAG…	MHQEDVEKIGKNRIAFVMFASIFLVVMVVVATVSIGRRPNNGKSEVDVSSQSHDQVSASMKAIKTVCQPTDYQKQCVESLQTESGNTTDPKELIRAAFQVAKKHVAAAAKRSRTLKQLEKDPRASLALEDCNELMDEAIEDLQRSFEELGKSDHQARYKMGPMINNLKTWLSSTITYQETCLDGFANTTGEAGVKMREILKTSIELTINAIAMVSKISSILGNLDINREINLGSSHHRGLIENNAKVLGHGGIHVLEHGDLYPSWLGPRNRKLLGLIDQAQFKPDVVVAKDGSGNCTTINEALNFIPKKSNKTTTIYIKEGIYQEKVYLNRSMARVFMIGDGMYKTRITGNLNYVDGTPTMHTATVSILGEFFMAKNIGFENSAGPEKHQAVALRVDAD…	5	33642731	33648714	-1	aCL9222Contig1|aKN0AAP8YH13FM1_c							Cs3g14610.1	82
CitPME32	Ciclev10003641m	ATGGCTTCAAATCCGTCAACTCTGCTTATAATTTCTCTCTTTCTCTTGCTCTTCTTCTCTCTTTCACTCGCTGATGATTTTGCTACAAGCTTATTCTCATCAACTCTCGACCCAATTTGCAAATTCACCCCTCATCCGGATTTCTGCAAGGCCAATTTGCCCGGTAACAAGCCTGGTACAGTTCATGACTATGGCAGATACTCTGTTCATCAATCTTTATCAGTAGCTAGAAAATTTCAATCATTAGTTGATCATTACCGCAAGCTTCCATCAACATCGTACTTATCCACCATTCGTGCACTCGAAGATTGCAGCCTCTTAGCTGGAATGAACGTAGACTCCTTGTCACATGCTTCAAATACTATAAATTCTACAAACACTTTGCATAGCCTGCAAGCT…	MASNPSTLLIISLFLLLFFSLSLADDFATSLFSSTLDPICKFTPHPDFCKANLPGNKPGTVHDYGRYSVHQSLSVARKFQSLVDHYRKLPSTSYLSTIRALEDCSLLAGMNVDSLSHASNTINSTNTLHSLQADDLHTLLSALLTNQQTCLDGLLETASASRITQALLAPLQNGAKFYSISLALVIHGWFSGMKNGRWLTERKHLLSNTRPGINGDHLPLKMSSRDRRIYESVTGRKLLQANDDQFVDNVSVDQMVVVNPNGTADYTTISDAVAAAPNSTDSSSNGYYLIYVAAGVYEEYVSIPKQKKNLMMIGAGKGLTVITGNRSYVDGWTTFNTATFAVVGQGFVAVNITFRNTAGPTKHQAVAVRNGADKSTFYSCSFEGYQDTLYAHSLRQFYR…	5	33692663	33694653	-1								Cs3g14640.1	100
CitPME33	Ciclev10000816m	ATGGGCTTGGCCTATTTTTTTCTAATTCTAATCTTTTCGCCTTCACTTGCAGCTTTATCCAATGCAGCATCTTTAGACAAACAAAATTTATCCCCACAAGCCCTGATGACACTAGCTTGTTCAAGTATTCAAAACCAGGATTCTTGCCTCTTAAATCTACAATCAGCACTTGAAAACAAGATCCCTCAAACTCCAAATTCAATCTTACATGCAGCTCTTAGAGCCTCACTTAATGAAGCAAAACTGGCAATCCAATCAATAACAAAGTTCAACTCTTTGTCTATCAGTTCTCGTGAACAGATGGCCATTGAAGACTGCAAAGAGCTCTTAGATTTCTCTGTTTCTGAATTGGCCTGGTCTTTAGATGAAATGAAACGGATTCGAGCTGGAGATAAGAAT…	MGLAYFFLILIFSPSLAALSNAASLDKQNLSPQALMTLACSSIQNQDSCLLNLQSALENKIPQTPNSILHAALRASLNEAKLAIQSITKFNSLSISSREQMAIEDCKELLDFSVSELAWSLDEMKRIRAGDKNVHYEGNLKAWLSAALSNQDTCLEGFEGTDRRLENFINGSLQQVTQLITNVLSLYTQLHSLPFKPPRINDTQSESPKFPKWMTEGDKGHMDMKPTRMHADAVVALDGTGHYRTITEAINAAPSYSKRRYVIYVKKGVYRENVDMKKKKTNIMLVGDGIGATVVTGNRNFMQGWTTFRTATVAVSGKGFIARDMTFRNTAGPQNHQAVALRVDSDQSAFFRCSVEGYQDTLYAHSLRQFYRECNIYGTIDFIFGNGAAVLQNCKIYSR…	5	33695912	33697986	-1								Cs3g14650.1	100
CitPME34	Ciclev10003837m	CATGAGCCTGCTTTAGATGTTGCCAAGAAGTGTGGCATTTTGTGTTCAAGATGTCTAAAATTGTTTTCTGGGAAAATTCGGAGAGCTGATCAAGATTGCAAAGGGTCAAATGTCGCATATACTGTCACTGTTGATCAGTCAAGTAGTCAATACAGAACTGTTCAAAGTGCCATTGATTCCATTCCAGCTGAGAATAGTCAATGGATCAAAATTCACATCAAAGCTGGCACCTACAAGGAGAAGATAAAAATTCAGCGGAACAAGCCATGTATTTTGCTTGAAGGGGAAGGCAGCGGTGTCACAAAAATTACATATGATGACCATCAAAGTACAGATACAAGTGCTACTTTCTCTTCATTTGCTGACAATGTGGTTGCAAAGGGTATCACTTTTGAGAAT…	HEPALDVAKKCGILCSRCLKLFSGKIRRADQDCKGSNVAYTVTVDQSSSQYRTVQSAIDSIPAENSQWIKIHIKAGTYKEKIKIQRNKPCILLEGEGSGVTKITYDDHQSTDTSATFSSFADNVVAKGITFENSYNLAVEILAELDRRGRDLGTLQAGNDITQALAARIYGDKSAFYDCRFLGVQDTLWDVQGRHFFKSCYIEGAIDFIFGNGQSVYEDCSVNSTAGLLIGGRGSGYITAQSRGSANDPGGFVFRGGEVTGTGQAYLGRAYGPYSRVIFYNAWLSSVVTPPGWNAWNLQGQEGNFMYAEVNCKGPGSDTSNRVSWEKKIDPKLLYKYSTSYFINQDGWISKQPQ*	5	34133490	34136917	-1	Phytozome v10.2|C. sinensis	ATGCGGCCTGTTTTAAAATCTTTGTTCGTTTTCACATTGATTTCAACCATTTCTTTTGGGGCTGCTAGAGCTGATCAAGATTGCAAAGGGTCAAATGTCGCATATACTGTCACTGTTGATCAGTCAAGTAGTCAATACAGAACTGTTCAAAGTGCCATTGATTCCATTCCAGCTGAGAATAGTCAATGGATCAAAATTCACATCAAAGCTGGCACCTACAAGGAGAAGATAAAAATTCAGCGGAACAAGCCATGTATTTTGCTTGAAGGGGAAGGCAGCGGTGTCACAAAAATTACATATGATGACCATCAAAGTACAGATACAAGTGCTACTTTCTCTTCATTTGCTGACAATGTGGTTGCAAAGGGTATCACTTTTGAGGTAAAGGGTTCAATGCCA…	MRPVLKSLFVFTLISTISFGAARADQDCKGSNVAYTVTVDQSSSQYRTVQSAIDSIPAENSQWIKIHIKAGTYKEKIKIQRNKPCILLEGEGSGVTKITYDDHQSTDTSATFSSFADNVVAKGITFEVKGSMPLSKTLLASSRNDITQALAARIYGDKSAFYDCRFLGVQDTLWDVQGRHFFKSCYIEGAIDFIFGNGQSVYEDCSVNSTAGLLIGGRGSGYITAQSRGSANDPGGFVFRGGEVTGTGQAYLGRAYGPYSRVIFYNAWLSSVVTPPGWNAWNLQGQEGNFMYAEVNCKGPGSDTSNRVSWEKKIDPKLLYKYSTSYFINQDGWISKQPQ*	5	34133490	34135281	-1	Cs3g15260.1	94.7
CitPME35	Ciclev10013444m	ATGAGAAGCAATTCCTTTTGGGTTTTCGCATTTGCCGTTTCCCTATTGTCCATAATATTTTCTCTCTTTATTACCATCCCTCCTCATTCCTCTACAACTACAACCATTATTAGCCTTACTCAAATTCCAATTTTGATAATGAGGGTGATTGTGGAGGACTTGCTATCTCTCGTAACAAGACATCATCATCATCATCATCACCACCGAGTTAAATGTGATAAGAATAATTGGAGGTTGAGGATAATATCCCATTACAAATGGCTTGTGTACCATTACAGAGTCTCTCTCATTTTGACCGTCGACTTGCATGGTTGTGCCAATTTTAGTAGTGTACAAAAGGCTGTCGATGCTGTTCCAAGTTTTAGTCCTTCTAAAACCCTCATCATAATTGATTCTGCT…	MRSNSFWVFAFAVSLLSIIFSLFITIPPHSSTTTTIISLTQIPILIMRVIVEDLLSLVTRHHHHHHHHRVKCDKNNWRLRIISHYKWLVYHYRVSLILTVDLHGCANFSSVQKAVDAVPSFSPSKTLIIIDSATYREKVVVNANKTNLIFLGRGYLNTIIEWNDTANSTGGTAYSSSVAVFASNFTAYNISFMNTAPRPSPGDVGGQAVALRIGGDQAAFYNCGFYGAQDTLYDDHGRHYFKDCFIQGSIDFIFGNARSLYEDCTINSIAEQVPDGMVSGSITAQGRQSMSEETGFSFVNCQIDGTGRVWLGRAWGVCAAVVFSKTYMADVVSSDGWNDWQDPSRDLTVFFGEYDCLGPGANYSYRASFGKQLMQYEAAPYMNISYIDGDEWLHHHQDI…	6	6311397	6313802	1	Phytozome v10.2|C. sinensis	ATGAGAAGCAATTCCTTTTGGGTTTTCGCATTTGCCGTTTCCCTATTGTCCATAATATTTTCTCTCTTTATTACCATCCCTCCTCATTCCTCTACAACTACAACCATTATTAGCCTTACTCAAATTCCAATTTTGATAATGAGGGTGATTGTGGAGGACTTGCTATCTCTCGTAACAAGACATCATCATCATCATCATCACCACCGAGTTAAATGTGATAAGAATAATTGGAGGTTGAGGATAATATCCCATTACAAATGGCTTGTGTACCATTACAGAGTCTCTCTCATTTTGACCGTCGACTTGCATGGTTGTGCCAATTTTAGTAGTGTACAAAAGGCTGTCGATGCTGTTCCAAGTTTTAGTCCTTCTAAAACCCTCATCATAATTGATTCTGCT…	MRSNSFWVFAFAVSLLSIIFSLFITIPPHSSTTTTIISLTQIPILIMRVIVEDLLSLVTRHHHHHHHHRVKCDKNNWRLRIISHYKWLVYHYRVSLILTVDLHGCANFSSVQKAVDAVPSFSPSKTLIIIDSATYREKVVVNANKTNLIFLGRGYLNTIIEWNDTANSTGGTAYSSSVAVFASNFTAYNISFMNTAPRPSPGDVGGQAVALRIGGDQAAFYNCGFYGAQDTLYDDHGRHYFKDCFIQGSIDFIFGNARSLYEDCTINSIAEQVPDGMVSGSITAQGRQSMSEETGFSFVNCQIDGTGRVWLGRAWGVCAAVVFSKTYMADVVSSDGWNDWQDPSRDLTVFFGEYDCLGPGANYSYRASFGKQLMQYEAAPYMNISYIDGDEWLHHHQDI…	6	6311397	6313847	1	orange1.1t01085.1	88.7
CitPME36	Ciclev10011953m	ATGAATCTCTTAAGCATTGTCCTAGCCATTCTGGTTGCCATTCTTTCATCAACTTTTCTCATCAATCCAAACACATTACTAACCACATTTTTACCACCGAATATTGTTACAAAATTTATTCCATACAACATTGATCGGGGCCATCGTCATCGAAAACGCCCCGACCACCGCAAAAAAGTTTCGATCTGCGATGATTTTCCGAAGGATTTTGCACCTCCGGATACAAACACGACGTCGTACTTTTGTGTTGATCGAAACGGGTGTTGTAATTTCACCTCAGTGCAATCGGCTGTTGACGCAGTTCCAAATTTGAGCCTTAAAAGAAACATCGTCTTGATCAACTCTGGCATTTACTATGAAAAGGTCACAGTTCCAAAAACGAAACCAAATATAACATTT…	MNLLSIVLAILVAILSSTFLINPNTLLTTFLPPNIVTKFIPYNIDRGHRHRKRPDHRKKVSICDDFPKDFAPPDTNTTSYFCVDRNGCCNFTSVQSAVDAVPNLSLKRNIVLINSGIYYEKVTVPKTKPNITFQGQGYTSTAIAWNDTAKSANGTFYSGSVQVFASNFMAKNISFMNVAPIPSPGDVGAQAVAIRISGDQSAFFGCGFFGAQDTLHDDRGRHYFKDCYIQGSIDFIFGNARSFYENCQLISMANPVAPGSKAINGAVTAHGRASKDENSGFAFVNCTIGGTGRIWLGRAWRPFSRVVFLFASMTDIIAPEGWNDFNDPTRDQTVFYGEYNCTGAGSDMTMRAPYVQRLNDTQASLFLNTSFIDGDQWLQSYNN*	6	18457555	18460527	1								Cs6g11440.1	99.7
CitPME37	Ciclev10012239m	ATGGCATCATGTGTGGTGACGGTGGCGCAGGATGGGACGGGGCATTACAGGACGGTGCAGGAGGCAATAGATAGGGTGCCGCTGTGCAACACTTGTCGGACTCTGATTCGTATATCACCTGGGGTTTATAGACAGCCGGTGTATGTGCCAAAGACTAAGAACCTCATTACACTCGCGGGTCGTTGTCCCGAAAACACCGTACTCACTTGGAATAACACCGCCACTAAAATTGAACACCATCAGGCTGCGAGGGTAATTGGGACTGGGACTTTTGGGTGTGGGAGTGTGATTGTGGAAGGAGAAGATTTCGTTGCTGAGAATATCACTTTCGAGAATTCTGCACCTGAGGGTTCCGGCCAAGCTGTGGCAATCAGGGTAACTGCAGACCGATGCGCCTTC…	MASCVVTVAQDGTGHYRTVQEAIDRVPLCNTCRTLIRISPGVYRQPVYVPKTKNLITLAGRCPENTVLTWNNTATKIEHHQAARVIGTGTFGCGSVIVEGEDFVAENITFENSAPEGSGQAVAIRVTADRCAFYNCRFLGWQDTLYLHYGKQYLKDCYIEGSVDFIFGNSTALIEHCHIHCKSQGFITAQSRKSSQETTGYVFLRCVITGNGGTGYMYLGRPWGPFGRVVFAFTYMDQCIRHVGWHNWGKVENERSACFYEYRCFGPGSCPAKRETWARELLDEEAEQFLMHNFIDPDPQRPWLAQRMAVRIPYSA*	6	25121919	25125183	1	aCL1883Contig1							Cs6g21590.1	99.1
CitPME38	Ciclev10027321m	ATGTTGCTGAAGCTATTCTTGTTGGCTTTATTGTTAGAAAGAACGAGTTCTTGGGTTGCTTCAAACGAGTCCAATGATCTAGCAGTGGTCGAACAAGGATACCTGAATTGGGTTAATTTTAAACAACATGCTCCTCATTTGAATCACTCTCTCTTCCAAAAAGCAAAGAACAAGTTCAAGCCTTGTAAAACCATTAAAGTGAACAAGAACCCCAGGCTTGGAAATTTCGTTACAGTTCAAAAGGCTATTAATTCGCTTCCAGTTATAAATCTCTGCCGGGTTGTCATCTTCATTAGTGCAGGAACTTACAGGGAGAAGGTTGAGATTCCAACGACAATGGCCTACATTACTATGATAGGTGCTGGAGCAGACAACACGGTTATTGAGTGGGATGACACA…	MLLKLFLLALLLERTSSWVASNESNDLAVVEQGYLNWVNFKQHAPHLNHSLFQKAKNKFKPCKTIKVNKNPRLGNFVTVQKAINSLPVINLCRVVIFISAGTYREKVEIPTTMAYITMIGAGADNTVIEWDDTADRMGRSGRPLGTYASATFAVNSPYFIAKNITFKNKAPLPPSGALGKQAVAFRISADTAAFTGCKFIGSQDTLYDHIGRHYFKNCYIEGSVDFIFGNGLSFYEDCHLHAITNSYGALTAQKRGSLLEETGFSFVKCKVTGSGALYLGRAWGTFSRVVFAYTYMDKIITPRGWYDWGDKNREMTVFYGQYKCSGPGAYYGGRVSWSRELTQEEAEPFISVEFIDGHQWLPSHSL*	7	1404813	1406356	1								Cs1g25000.1	86.9
CitPME39	Ciclev10025232m	ATGGAAACGATCAGATCCTTTAAGGGATATGGCAAAGTCGATGAGCTCGAGCAACAAGCATTCCGGCGAAAGACACGTAAGCGTGTGATCATCTTAATCATCTCATCCATAGTCCTTGTGGCCGTGATCATTGGTGCAGTCATTGGAGTCGTCGTGCACAAGAACAAAAACGATTCATCTTCCGATAATATGCCTGCAACTCAGCTGACCCCAGCGGCTTCACTCAAAGCCGTATGCAGCGTGACTCGGTACCCAGATTCTTGCTTCTCCAGCATTTCCTCCATCGACGCATCAAACGTAACCAAGGACCCAGAAATCCTCTTCAAGCTCTCTTTACAAGTCGCCATGAATGAGCTTGGGAAATTACAAAACTATCCCTCGAAGCTGAAGCAGCAAACG…	METIRSFKGYGKVDELEQQAFRRKTRKRVIILIISSIVLVAVIIGAVIGVVVHKNKNDSSSDNMPATQLTPAASLKAVCSVTRYPDSCFSSISSIDASNVTKDPEILFKLSLQVAMNELGKLQNYPSKLKQQTKDPQVIEALKVCETLFDDALDHVNESLSSMQVGSGEKLLSSKKIQDLKTWLSTSITDQDTCLDALQELNVSHYQNSNILKDIRSAMQNSSEFASNSLAIGSKVLGLLGKVDIPVHRRLLSDHSDSGFPNWVGAGDRRLLQEANPKPDATVAQDGSGDYDTIKAAVAAVRKKSPTRFVIYVKKGTYRENVILDKSRWNVMMYGDGKTMTIVSGSLNFVDGTPTFATATVAVAGRGFIAKDMTFINTAGPEKHQAVAFRSGSDRSVFY…	7	7898245	7901186	-1	aCL2814Contig1							Cs1g16560.1	98.1
CitPME40	Ciclev10025238m	ATGACCCACATAAAAGAATTCTTCACAAAACTTTCTGAATCTTCTAGCAACCAAAACATTTCCAATATTCCCAAGAAAAAAAAGAAACTATTCTTAGCTCTTTTTGCAACGCTACTCGTTGTTGCTGCCGTAATCGGCATTGTCGCCGGAGTGAACTCAAGAAAAAACTCCGGCGACAACGGCAACGAGCCTCATCATGCTATCCTCAAATCATCATGCAGCAGCACAAGGTACCCGGACTTATGCTTTTCGGCTATTGCTGCCGTTCCAGAGGCCTCCAAAAAGGTGACAAGCCAAAAGGACGTTATTGAGATGTCCTTAAATATCACAACAACAGCCGTGGAACACAACTACTTCGGGATTCAGAAGCTCTTGAAGAGAACGAATCTCACCAAACGG…	MTHIKEFFTKLSESSSNQNISNIPKKKKKLFLALFATLLVVAAVIGIVAGVNSRKNSGDNGNEPHHAILKSSCSSTRYPDLCFSAIAAVPEASKKVTSQKDVIEMSLNITTTAVEHNYFGIQKLLKRTNLTKREKVALHDCLETIDETLDELHKAVEDLEEYPNKKSLSQHADDLKTLMSAAMTNQGTCLDGFSHDDANKHVRDALSDGQVHVEKMCSNALAMIKNMTDTDMMIMRTSNNRKLTEETSTVDGWPAWLSPGDRRLLQSSSVTPNAVVAADGSGNFKTVAAAVAAAPQGGTKRYIIRIKAGVYRENVEVTKKHKNIMFIGDGRTRTIITGSRNVVDGSTTFKSATVAVVGEGFLARDITFQNTAGPSKHQAVALRVGADLSAFYNCDMLAY…	7	7904865	7908319	-1	aCL120Contig3| CsPME1							Cs1g16550.1	99.1
CitPME41	Ciclev10025271m	ATGGCCAAATCATCATCATCATCACATTCACTCCTCCACAAGAAACCCACCAAGTCCAGTCTCCTCACTCTCTTCTCAATGGCTTCCGCTCTTCTCATTTCCCTCTTATCCCTCTCCCTCTTATTTTCTCTTTCTTCTTCAACCTCTCGTCGTCACCACACTCCCCTGCAGCAGCAGCAACAACCGCCAGTCCCTCAAATCCAGCTCGCCTGCAAGGCCACTCGCTTCCCCGACGTGTGCCAGCAATCCCTCTCCCAATCCCACAACGTCCCCCCTAATCCCTCCCCCGCGCAAATGATCCAATCCGCCATCGGGGTCTCCTCCCAAAACCTCGAGACCGCCAAATCGATGGTGAAGCGGATCCTCGACTCCTCCTCCGACAGTCAGAACCGCTCCCGG…	MAKSSSSSHSLLHKKPTKSSLLTLFSMASALLISLLSLSLLFSLSSSTSRRHHTPLQQQQQPPVPQIQLACKATRFPDVCQQSLSQSHNVPPNPSPAQMIQSAIGVSSQNLETAKSMVKRILDSSSDSQNRSRAATTCLQILGYSGARSQSASDALPRGKLKDARAWYSAALTYQYDCWSALKYVNDTKQVGETMAFLDSLTGLTSNALSMMMSFDNFGEDFNAWRAPQTERAGFWEKGGSGAAQFGFRGGFPSKLTADVTVCKDGSCKYKTVQDAVNAAPDNVPTKRFVINIKAGVYEETVRVPFEKKNVVFLGDGMGKTVITGSLNVGQQGVSTYESATVGVLGDGFMASGLTIQNTAGPDAHQAVAFRSDSDLSIIENCEFLGNQDTLYAHSLRQF…	7	16549516	16552404	1	aCL2379Contig1							Cs1g05510.1	100
CitPME42	Ciclev10029966m	ATGGCTACCAGCTCTGCTGCTACAAGCTCCATTGATATGTCCACTACTATTCTCATTAGAGTTGATCAATCTGGCCGAGGAGATTTTAAGAAGATACAAGACGCAATTGATTCTGTTCCTTCGAACAACTCAAAATTGTATTTCATTTGGATTAAACCGGGAACTTACAGAGAAAAGATTGTTGTGCCAGCTGATAAGCCCTTCATAACAATAAGTGGCACAAAGGCTTCTAACACCATAATAACTTGGAGTGATGGCGGGGAGATATTTCAATCTGCAACTTTCACTGTGCTGGCTTCTGATTTTGTTGGACGATTTCTAACAATTGAGAACACTTATGGATCAGCCGGCAAAGCTGTTGCACTAAGAGTGTCAGCAAATCGAGCAGCATTTTATGGC…	MATSSAATSSIDMSTTILIRVDQSGRGDFKKIQDAIDSVPSNNSKLYFIWIKPGTYREKIVVPADKPFITISGTKASNTIITWSDGGEIFQSATFTVLASDFVGRFLTIENTYGSAGKAVALRVSANRAAFYGCRILSYQDTLLDDTGNHYYSSCYIEGATDFICGNAASLFERCHIHSLSTGNGAITAQKRVSSEENTGFTFLGCKITGVGKGVLGRPWGPYSRVVYALTYMSGLVLPQGWNDWHDYAKHTNVYYGEYKCYGPGADRSNRVAWSLSLSENEAATFLTKDTIGGRAWLRPAPSNFKIGASATIAARTDENN*	8	5199754	5201148	1								Cs2g16380.1	92.2
CitPME43	Ciclev10029855m	TTTGCATTATTGATTGTAAAGCCATGCTTGAATTCGGTAGGTGCATGTCTAAGACGAGCTTCCCCGCCAGTAATGTCAGGCATGAAACTAGCGCTGCTTCAGCCAATTGTTTTTGCTTCAATTACGGCTACCTGCGGCTTTTCTGCTACAATCCCCAAAGATATTTCCACTGCTGTTCTCATTAGAGTTGAAAAATATGGCAGAGGAGATTTTAGGACCATACAAGAAGCCATTGATTCTGTACCAGCTAATAACTCAGAATTGGTTTTCATTTCGGTTGCCCCAGGAATTTACAGAGAAAAGATTATTGTGCCTGCTAATAAGCCCTTCATAACAATCAGTGCGACAAAGGCATCTCACACCAAAATAACATGGAGCGATGGCGGCTCCATTCTTGAT…	FALLIVKPCLNSVGACLRRASPPVMSGMKLALLQPIVFASITATCGFSATIPKDISTAVLIRVEKYGRGDFRTIQEAIDSVPANNSELVFISVAPGIYREKIIVPANKPFITISATKASHTKITWSDGGSILDSATLTVLASHFVARSLTIQNTYGSFGKAVALRVSADKAAFYGCRILSYQHTLLDDTGNHYYSKCYIEGATDFISGNANSFFERCLIHSLSTWGGAITAQKRVSSEENTGFTFLDCKISGVGKAVLGRPWGAYSRVVYALTYMSDVIVPQGWNDLNDHAKHNKLYYGEYRCSGPGADRSKRIAWSNSLSDVEASTFLSKDLTGRGTWLRNAALKFKDDFTINDANIKGNR*	8	5210259	5213547	-1	Phytozome v10.2|FGENESH	ATGGGTTCTGTTACAATGAAGAATTACAGTCAAAATGTTAGCATTCTGTTTGTTGCAACAGCAATTGTTTTTGCTTCAATTACGGCTACCTGCGGCTTTTCTGCTACAATCCCCAAAGATATTTCCACTGCTGTTCTCATTAGAGTTGAAAAATATGGCAGAGGAGATTTTAGGACCATACAAGAAGCCATTGATTCTGTACCAGCTAATAACTCAGAATTGGTTTTCATTTCGGTTGCCCCAGGAATTTACAGAGAAAAGATTATTGTGCCTGCTAATAAGCCCTTCATAACAATCAGTGCGACAAAGGCATCTCACACCAAAATAACATGGAGCGATGGCGGCTCCATTCTTGATTCTGCAACTCTCACTGTGTTGGCTTCTCATTTTGTTGCACGA…	MGSVTMKNYSQNVSILFVATAIVFASITATCGFSATIPKDISTAVLIRVEKYGRGDFRTIQEAIDSVPANNSELVFISVAPGIYREKIIVPANKPFITISATKASHTKITWSDGGSILDSATLTVLASHFVARSLTIQNTYGSFGKAVALRVSADKAAFYGCRILSYQHTLLDDTGNHYYSKCYIEGATDFISGNANSFFERCLIHSLSTWGGAITAQKRVSSEENTGFTFLDCKISGVGKAVLGRPWGAYSRVVYALTYMSDVIVPQGWNDLNDHAKHNKLYYGEYRCSGPGADRSKRIAWSNSLSDVEASTFLSKDLTGRGTWLRNAALKFKDDFTINDANIKGNR*	8	5210259	5211737	-1	Cs2g16360.1	55.2
CitPME44	Ciclev10030015m	ATGGCTACCTGCAGCTCTACTGCTACAATTCCCAAAGATTTTTCCACTGCTGTTCTCATTAGAGTTGAAAAATACGGCAGAGGAGATTTTAGGACCATACAAGAAGCCATTGATTCTGTACCAGCTAATAACGCGGAGTTGGTTTTCATTTCGGTTGCCCCAGGAATTTACAGAGAAAAGATTATTGTGCCTGCTAATAAGCCCTTCATAACAATTAGTGGCACAAGGGCTTCTCACACCAAAATAACATGGAGTGATGGTGGCTCCATCCTTGATTCGGCAACTCTCACTGTGTTGGCTTCTCATTTTATTGCAAGATCCCTAACGATTCAGAACACGTATGGATCATACGGCAAAGCGGTTGCGCTAAGAGTGTCTGCAGATAGAGCTGCATTTTAC…	MATCSSTATIPKDFSTAVLIRVEKYGRGDFRTIQEAIDSVPANNAELVFISVAPGIYREKIIVPANKPFITISGTRASHTKITWSDGGSILDSATLTVLASHFIARSLTIQNTYGSYGKAVALRVSADRAAFYGCRILSYNHTLLDDTGNHYYSKCYIEGATDFISGNANSFFERCLLHSLSTWGGAITAQKRVSSEENTGFTFLDCKISGVGKAVLGRPWGPYSRVVYALTYMSDEIVPQGWNDLNDHAKHNKLYYGEYRCSGPGADGSKRVAWSNSLSDAEASMFLSKDLTGGGAWLRNAALKFKDDFTINDAKTKGNR*	8	5233911	5235311	-1								Cs2g16360.1	51.2
CitPME45	Ciclev10030026m	ATGAAGAATTATAGTCAAAATGTCAGCATTCTGGTTGTTGCAACAACAATTGTTTTTGCTTCAATCACGGCTACCTGCGGCTCTACTGCTACAATTCCCAAAGATTTCTCCGCTGCTGTTCTCATTAGAGTTGAAAAATACGGCAGAGGAGATTTTAGGACCATACAAGGAGCCATTGATTCTGTACCAGATAACAACTCAGAATTGGTTTTCATTTCGGTTGCCCCAGGAATTTACAGAGAAAAGATTATTGTGCCTGCTAATAAGCCTTTCATAACAATCAGTGGCACAAAGGCATCTCACACCAAAATAACATGGAGTGATGGTGGCTCCATCCTTGATTCTGCAACTTTCACTGTGTTGGCTTCTCATTTTGTTGCGCGATCTCTAACGATTCAG…	MKNYSQNVSILVVATTIVFASITATCGSTATIPKDFSAAVLIRVEKYGRGDFRTIQGAIDSVPDNNSELVFISVAPGIYREKIIVPANKPFITISGTKASHTKITWSDGGSILDSATFTVLASHFVARSLTIQNTYGSYGKAVALRVSADRAAFYGCRILSYQHTLLDDTGNHYYSKCYIEGATDFISGNANSLFERCLIHSLSTWGGAITAQKRVSSEENTGFTFLDCKISGVGKAVLGRPWGPYSRVVYALTYMSDVILPQGWNDLNDHAMQKKLYYGEYRCSGPGADRSKRIAWSNSLSDVEAYMFLSKDLTGGGAWLRNAALKFKDDFTINDANTKGNR*	8	5247568	5249034	-1								Cs2g16350.1	98.6
CitPME46	Ciclev10030318m	ATGAAGAATTATAGTCAAAATGTTAGCATTCTGTTTGTTGCAACAACAATTGTTTTTGCTTCAATCACGGCTACCTGCGGCTCCACTGCTACAATTCCCAAAGATTTCTCCACTGCTGTTCTCATTAGAGTTGAAAAATACGGCAGAGGAGATTTTAGGACCATACAAGAAGCCATTGATTCTGTACCAGATAATAACTCAGAATTGGTTTTCATTTCGGTTGCCCCAGGAATTTACAGAGAAAAGATTATTGTGCCTGCTAATAAGCCCTTCATAACAATCAGTGGCACAAAGGCATCTCGCACCAAAATAACATGGAGTGATGGTGGCTCCATCCTTGATTCTGCAACTCTCACTGTGTTGGCTTCTCATTTTGTTGCGCGATCTCTAACGATTCAG…	MKNYSQNVSILFVATTIVFASITATCGSTATIPKDFSTAVLIRVEKYGRGDFRTIQEAIDSVPDNNSELVFISVAPGIYREKIIVPANKPFITISGTKASRTKITWSDGGSILDSATLTVLASHFVARSLTIQNTYGSYGKAVALRVSADRAAFYGCRILSYQHTLLDDTGNHYYSKCYIEGATDFISGNANSLFERCLIHSLSTWGGAITAQKRVSSEENTGFTFLDCKISGVGKAVLGRPWGPYSRVVYALTYMSDVILPQGWNDLNDHAKQKYIIYSINLL*	8	5286878	5288051	-1								Cs2g16320.1	81.3
CitPME47								Phytozome v10.2|FGENESH	ATGGGTTCTGCTACAATGAAGTATGTTAACATTATGTTTCTGGCCACAATTGTTTTTGCTTCACTCATGGCTACCAGCACTGCTGCTACTAGCTCCATGGATTTGTCTACTGCCATTCTCGTTCAGTTGATCAATCTGGCAAAGGAGATTTTAAGAAGATACAGGATGCCATTGATTCTGTGCCGTCTAATAACTCGGAAACTGTTTTCATCCGAGTTAAGCCAGGAACATACAGAAAAGATTGCTGTTCCTGCTGATAAGCCTTTCATTACGATAAGTGGCACAAAGGCTTCTAGCACCATAATAACTTGGAGTGATGGTGGGGAGATTTTTGAATCTGCAACATTCACTGTGTTGGCAGATGATTTCGTTGGAAGATTTCTAACCATTGAGAACACT…	MGSATMKYVNIMFLATIVFASLMATSTAATSSMDLSTAILVQLINLAKEILRRYRMPLILCRLITRKLFSSELSQEHTEKIAVPADKPFITISGTKASSTIITWSDGGEIFESATFTVLADDFVGRFLTIENTYGSAGKAVALRVSADRAAFYGCRILSYQDTLLDDTGNHYYCNCYIEGATDFICGDAASLFESCHIHSLSTGNGAITAQKKVLPEEKTGITFLGCKITGVGKAVLGRPWGTYSRVVYALTYMSGVIQPPGWDDWHDYRIVKKKFLHQRLKFHWSLVRYDIAIDINTRGPSHVMNFAKKCKKLKTRIMEKPFSMGDTIARELNFNNSKTEPKLDVEKEIELAVKSKQALENDEDARKKMKELGLER*	8	5289517	5292278	1	Cs2g16310.1	75.1
CitPME48								Phytozome v10.2|FGENESH	ATGCTTTCTTCAATCTCTCTCTCTCTCTCTCTCTTTTTTCCTTCAATTGATGTCATCGAATTCATTCTTGTTGCTGTTGGAGCTTCCATTTTGCTTCTTGTGGGTGTGTGCATTGGCATCATAGTTGGTGCAAGCAGCAAACGTAGCAACAAGAATGAAAGTAATGCCGTCTCCGCAAATTCAAAGGCAGTTGCTGCAGTTTGTGCCTCAACTGATTACCGGCAACAGTGTATTGAGAGGGTAAAACCAGCTGCCAAAAGTAAAACCGCTACTCTAAAAAAATTCATCCAAGCCGCTATTAAAGCCATAATCAATATGGTGGAAGGAGCAAAGAATAACTCGGGCTTTATACTTGACACCAAAGATCCTGCTCAAAAGATGGCAAAGGAAGATTGCGAT…	MLSSISLSLSLFFPSIDVIEFILVAVGASILLLVGVCIGIIVGASSKRSNKNESNAVSANSKAVAAVCASTDYRQQCIERVKPAAKSKTATLKKFIQAAIKAIINMVEGAKNNSGFILDTKDPAQKMAKEDCDELMNFAVEDLQASFSVACTDGVTQPELKNQTIGGLQNATQLTSNALAIVSAISGILNTFHIPQNMAATSRRLLHAHKTGNGEYPEWLSESDRELLASQNNNQNASSKLTRKQVNVFMYGDGPRKTIFTGRKNNRERISTYKTASFLVVGNGFITKAIGFQNTAGPEGHHAVALRVQSDMSAFYNCRMDGKPMDNPKNTVTAHGLEDRRETTGLIIQNCRIVPEELLYPVRFKIPTYLGRPWKLYSRTIIMETTMGDFIQPAGWLEW…	9	179100	180951	-1	Cs9g01300.1	47
CitPME49	Ciclev10006909m	ATGTCGTCCTCTTATTTGCTTCCTTGGAGATTTTTTCGATTAATTAACGTAGCCGGTGTAATTCTTTTTCTCCAACTCACTTGTTTCTCCGATCGTGTCCATAGCTTGACCAAGAAAACCGTGTTTGATGCTCCTCTATTGACAGAAAAACTGAACACCAACCGGACAATCAAAGTTGACATCAATGGCGACGGGGACTTTAAATCCATACAAGATGCCATCAATGCGGTTCCTAAAGGGAACCCTAACTGGATCATTATCCATGTTCGAAAAGGCGTTTACAGAGAGAAGGTGTACATACCAGAGGACAAGCCCTACATATTCATGAGAGGAAATGGTAAGGGGAAAACGGCCATTGTTTGGTCGCAAAGTGCTACTAACAATAAGGACTCTGCTACA…	MSSSYLLPWRFFRLINVAGVILFLQLTCFSDRVHSLTKKTVFDAPLLTEKLNTNRTIKVDINGDGDFKSIQDAINAVPKGNPNWIIIHVRKGVYREKVYIPEDKPYIFMRGNGKGKTAIVWSQSATNNKDSATFSVEAPHFIAFGISFKNEAPTGVAFTSQNQSVAAFVGADMNAFYHCAFYSTHNTLFDYKGRHYYHNCYIQGSIDFIFGRGRSIFQNCEIFVIDDKRVKIHGSITAQNREDNTDNSGFVFIEGKVYGTGDVYLGRAKGAYSRVVFAKTYLSRTIVPHGWTNWSYVGSTDNLFQAEYRCHGPGAEAKHRVPWSKQLSDQEAEKFMSIDFVDGKNWLPAWV*	9	796756	798547	1								Cs9g02180.1	100
CitPME50	Ciclev10007120m	ATGCCATTTGCTCGTTGTCTTTTTTGTTTATGTGTTCTTCTCTTTACTTGTCATTTGGGAACAACAAATGCAAAATCATTTTTCAAGCTTGGCAGCAGAGCAGCTTCTTGCCAAATAGTTGTTGATCACTCAGGCCATGGAAACTTTTCAAGCATTCAATCGGCAATTGATAACGTTCCTTCGAATAACAAGAATTGGGTTTGCATCTTCATCAAGGCTGGCATATATAGGGAGAAGGTGAAAATCCCATATGAAAAGCCATTCATAATCCTTAAAGGAGTGGGAAAGAGAAAGACTCGGATTATATGGGATGATCATGAATCACTCGCAGCCAGCCCTACTTTTGCTTCTTTTGCTGATAATGTTGTTGTCAAAAGCATGAGCTTTGTGAATTCATAC…	MPFARCLFCLCVLLFTCHLGTTNAKSFFKLGSRAASCQIVVDHSGHGNFSSIQSAIDNVPSNNKNWVCIFIKAGIYREKVKIPYEKPFIILKGVGKRKTRIIWDDHESLAASPTFASFADNVVVKSMSFVNSYNSPRSDNKNPRMPAVAAMVAGDKTAFYRCGFSGVQDTLWDDQGRHYFDRCTIEGAVDFIFGGGQSIYENCVINVVGSTLQPGLHGFITAQGRTNPNDANGFVFKGGIVIGTGSTLLGRPWRGYARVLFYSVNLTNVVDPKGWEAWNSIGHENHLTFAEHGCYGGGADTSRRVRWEKKLSSAELTHLTSISFIDREGWLHKQPY*	9	15080665	15083824	1								orange1.1t03291.1	99.4
CitPME51	Ciclev10004742m	ATGGCAATGAAGCTAAGCGTATTCCTATTATTCATATCCTTAATTTCATTCTTTGCTCCTGCTGTTTCAAGCGTGGCCTCCAATGGCGTCGACTATTGGTGCAGCAAAACTCCACACCCAGAACCATGCAAGTACTTCATGCAACAAAACTCCAAACACTTCGCCGTCCCTAAGCAAGAATCCGAGTTTCGTAGAATGGCAATGAGCCTTGCATTGGACCGGGCACTCACTGCTCAGAATCACAACAAGTGGCTTGGTTCCAAATGCAGGAACCACAAAGAAAAGGTTGCATGGGCTGATTGCTTGAAGCTCTATCAAGATACCATCAATCAACTCAACCATACCCTTGACTCCAACACAAAATGCACCGATTTTGATGCCCAAACTTGGCTTAGCACT…	MAMKLSVFLLFISLISFFAPAVSSVASNGVDYWCSKTPHPEPCKYFMQQNSKHFAVPKQESEFRRMAMSLALDRALTAQNHNKWLGSKCRNHKEKVAWADCLKLYQDTINQLNHTLDSNTKCTDFDAQTWLSTALTNLETCRAGFVELGVPDYVLPLMSNNVTKLISNTLALRNASTVPETYKGGFPSWVKPGDRKLLQTSPVRPNLVVAQDGSGNYRTIKAALDAAAKRTGSGRFVIHVKRGVYKENLEIGNKMKNIMLVGDGLRYTIITGSRSVGGGFTTFNSATVAVTGDGFIARGITFRNTAGPQNHQAVALRAGSDLSVFYQCGFEGYQDTLYVHSQRQFYKECYIYGTVDFIFGNAAVVLQNCMIYARRPMDKQKNVVTAQGRTDPNQNTGIS…	9	27534026	27535693	-1	aCL8133Contig1							Cs9g14450.1	99.4
CitPME52	Ciclev10004719m	ATGGCCAAAGAGAACATCAGCCTGCTGATTATCTTCATATCCTTGTCTTCAATTTTCTATCATGCTCTATCAAGGAGACCCTCGGCAACAAACATAACGTGGTGGTGCAGCAAAACCCCACATCCTGAACCATGCAACTACTTCTTGAGCCGCAGCCACCACCGTTACACATTCAAACATCGGTCCGATTTTCGGAAAATTATAGTCCAGGTAGCCATAGAGCAAGCCCATAAAGCGCACGACCAAGTCATGGAATTCGGAACAAATTGTGAAAACAAGCATCAGAAAGCTGCGTGGTCCGACTGTGTAAAGCTATATGCTAACACCGTTCTTCAACTAAACCGCACCTTACAAGGCTTGAAATCCGACCGGAGTTGTACTGATTTTGATGCACAAACA…	MAKENISLLIIFISLSSIFYHALSRRPSATNITWWCSKTPHPEPCNYFLSRSHHRYTFKHRSDFRKIIVQVAIEQAHKAHDQVMEFGTNCENKHQKAAWSDCVKLYANTVLQLNRTLQGLKSDRSCTDFDAQTWLSTALTNIRTCQSGYMELNVSDFITPVMSNNLSQLISNSLAVNGVLLKRENVTYTNGFPSWLSGHERNLLESSSLEARANLVVATDGSGNYRTIQAAINAAARRRGSGRFIIHVKRGVYRENIEVGLNNNNIMLVGEGMRNTIITSGQSVGSGSTTYSSATAGIDGLHFMGRDITFQNTAGPLKGQAVALRSASDLSVFYRCAFQGYQDTLMVHSQRQFYKKCYIYGTIDFIFGNAAVVFQNCIIFVRKPLKGQANVITAQGRND…	9	27540636	27542779	-1								Cs9g14440.1	98.7
CE18s Pectin-acetylesterases
CitPAE1	Ciclev10020385m	ATGAAGCCGATGTTGTATTTCTGCTTCGTGATTGTTTTGATCCGCTCTGCGAGTGGCTTCTTCGAGGATTTGGATGCTCGAGAGACTTCGCTTTCTTACTTAGAAAACGATGCTGCTGCTACGTCCGAGCCTCTCATGGTCCCTCTCACGCTTATTCAGGGAGCTGATTCCAAAGGAGCTGTCTGTTTGGATGGCACGCTGCCTGGTTATCATATACACCGGGGTTCTGGATCGGGAGCAAACAGCTGGCTCATTCATTTGGAAGGAGGTGGATGGTGTAATACCATTAGAAATTGTGTGTACCGCAAAACCACCCGCCGTGGATCAGCAAAATTTATGGAAAAGCAGCTACCATTTACCGGCATATTGAGCAACAAAGCTGAAGAAAATCCAGATTTC…	MKPMLYFCFVIVLIRSASGFFEDLDARETSLSYLENDAAATSEPLMVPLTLIQGADSKGAVCLDGTLPGYHIHRGSGSGANSWLIHLEGGGWCNTIRNCVYRKTTRRGSAKFMEKQLPFTGILSNKAEENPDFFNWNRVKLRYCDGASFSGDSQNEGAQLYFRGQRIWLTAMQDLMAKGMQNADQALLSGCSAGGLASILHCDEFRDLFPKTTKVKCLSDAGMFLDAVDVSGGHTLRNMFAGVVSLQEVQKNLPITCTSQLDPTSCFFPQNLVANIKTPMFLLNAAYDAWQVQASLAPPTADPHGYWSDCKSDHAHCNSSQIQFFQDFRNQMLNAVEVFSKSNENGLFINSCFAHCQSERQDTWYADDSPRIGDKGIAKSVGDWYFDRAALKAIDCPYP…	3	47202109	47206941	-1	aKN0AAP13YN19FM1_c							orange1.1t01789.3	100
CitPAE2	Ciclev10001371m	ATGGTTGCCGCAAGAATGGGCCAATGGTTGAATCTTTTAGTATGTGCACTCATATTACTGAAAGCTGACGGCTTTAATGTAGGAATCACTTATGTTGAGAATGCTGTAGTGAAAGGAGCTGTTTGTTTGGATGGTAGCCCGCCTGCTTACCATTTTGATAAGGGGTTTGGTGCGGGGATCAATAATTGGTTGGTTCACATTGAGGGAGGAGGATGGTGCAACAATGTCACAACTTGTCTTGAACGTAAGAAAACCCGTTTAGGTTCATCTAAGCAAATGGTCAAGGTAGTTGCATTCTCTGGGATGCTGAGCAACAAGCAAAAATTTAACCCAGACTTCTACAATTGGAATAGAATCAAGGTTAGATACTGTGATGGGGCATCGTTTACTGGAGATGTG…	MVAARMGQWLNLLVCALILLKADGFNVGITYVENAVVKGAVCLDGSPPAYHFDKGFGAGINNWLVHIEGGGWCNNVTTCLERKKTRLGSSKQMVKVVAFSGMLSNKQKFNPDFYNWNRIKVRYCDGASFTGDVEAVNPANNLHFRGARVFQAVMEDLMAKGMKNAQNAVLSGCSAGGLTSILHCDNFRALFPVGTKVKCFADAGYFINAKDVSGASHIEQFYAQVVATHGSAKHLPASCTSRLSPGLCFFPQYMARQITTPLFIINAAYDSWQGSSNILAPGVADPHGTWHSCKLDINNCSPTQLQTMQSFRTQFLNALAGLGISSSRGMFIDACYAHCQTEMQETWLRTDSPVLGKMSIAKAVGDWYYDRSPFQKIDCAYPCNPTCHNRVFDSNVHSE…	5	29050807	29055948	1	aCL67Contig5							Cs3g10410.1	99.3
CitPAE3	Ciclev10001467m	ATGGGCCAATGGTTCAATCTTTTAGTATGTGCACTCATAGTACTAAAAGCTCAAGCAGGCTTTAATGTATCAATCACCTATGTTGAAAATGCTGTAGCGAAAGGAGCTGTCTGTTTGGATGGCAGCCCACCTGCTTACCATTTTGATAAGGGGTTTGGAGCCGGGATCAACAATTGGTTGGTGCACATTGATGGAGGAGCATGGTGCAACAATGTCGAAGATTGTTCTAAGCGAAGGGATTCCTCATATGGTTCATCTAAGCATATGGTCAAGGAAGCTAATTTTACTGGGATACTAAGTAATGAGCAGAAATTTAACCCAGACTTCTACGATTGGAATAGAGTCAGGGTTAGATACTGCGATGGGGCATCGTTTACTGGAGACGTAGAGGCTGTCAAT…	MGQWFNLLVCALIVLKAQAGFNVSITYVENAVAKGAVCLDGSPPAYHFDKGFGAGINNWLVHIDGGAWCNNVEDCSKRRDSSYGSSKHMVKEANFTGILSNEQKFNPDFYDWNRVRVRYCDGASFTGDVEAVNPETNLHFRGARVFEAVMEDLLAKGMKNAQNAILTGCSAGGLTSILHCDNFRALFPVDTRVKCFADAGYFVNAKDVSGESHIEEFYKQVVALHGSAKHLPASCTSRLSPGLCFFPENVAGQIKTPLFIINSAYDSWQISNILVPEDADPKGAWSSCKVDIKTCSSTQLQTMQGFRVQFLNALAGLGNSSSRGMFVDSCYTHCRTDYQETWFSADSPVLDKTPIAKAVGDWYYDRSPFQKIDCPYPCNPLPESCF*	5	29056984	29060046	1								Cs3g10420.1	100
CitPAE4	Ciclev10001426m	ATGATTGCTAGAACAACGATGGGCCAATGGTTCAATCTTTTAGTATGTGCACTCTTAATACTGAAAGCTCAAGCATGCTTTAATGTATCAATCACCTATGTTGAAGATGCTGTAGCGAAAGGAGCTGTCTGTTTGGATGGCAGCCCACCTGCTTACCATTTTGATAAGGGGTTTGGTGCCGGGATCAACAATTGGTTGGTGCACATTGATGGAGGAGCATGGTGTAACAATGTCGCAGATTGTTCTAACCGAAGGGATTCCTCACATGGTTCATCTAAGTATATGGTGAAGGAAGCTAATTTTACTGGGATACTAAGTAATGAGCAGAAATTTAACCCAGACTTCTACGATTGGAATAGAGTCAAGGTTAGATACTGCGATGGGGCATCGTTTACTGGA…	MIARTTMGQWFNLLVCALLILKAQACFNVSITYVEDAVAKGAVCLDGSPPAYHFDKGFGAGINNWLVHIDGGAWCNNVADCSNRRDSSHGSSKYMVKEANFTGILSNEQKFNPDFYDWNRVKVRYCDGASFTGDVEAVNPETNLHFRGARVFEAVMEDLLAKGMKNAQNAILTGCSAGGLTSILHCDNFRALFPVNTRVKCFADAGYFVNVKDVSGASHIEEFYKQVVALHGSAKHLPASCTSRLSPGLCFFPQNVAGQVKTPLFIINSAYDSWQIRNILVPDNADPKGTWRRCKKDIKTCSSTQLQTMQGFRVQFLNALAGLGNSSSRGMLIDSCYTHCRTVFQEAWLSADSPVLDKTPIAKAVGDWYYDRNPFQKIDCPYPCNPLPESCF*	5	29072429	29075604	1	aCL67Contig4							Cs3g10430.1	38.5
CitPAE5	Ciclev10011803m	ATGGCAAATCAAAGGCTTCGCGCTTTGCTTAGGTGGACAAAATGGGCCGACTGGGCAATCGCAGCCGTCGGATTCACAATCATCATCTTCGTTCTCACTTTCTTCTTCGATTCCAGTTCTACCGATGGAGCAGCCTCTTCCGTTAATCTCCCCGCCAGCGATCTCGTTGACTTGACTTTGCTCCACAACGCCAAAGATAGAGGCGCCCTTTGTTTAGATGGGAGCTTACCTGGCTACCATTTTCAGAAAGGATTTGGATCTGGCTCTAACAATTGGCTTCTTCACATTGAGGGTGGAGGTTGGTGCAATACAATAGAATCATGTTCAACCCGTAAAACGACAGCGTTAGGATCCTCAAACCTTATGGAACGACAAGTTAGCTTTTCGGGAATTTTAAGC…	MANQRLRALLRWTKWADWAIAAVGFTIIIFVLTFFFDSSSTDGAASSVNLPASDLVDLTLLHNAKDRGALCLDGSLPGYHFQKGFGSGSNNWLLHIEGGGWCNTIESCSTRKTTALGSSNLMERQVSFSGILSSDPSQNPDFFSWNKVKIRYCDGASFAGRPESEFKNGTNLFFRGQLIWEALMDELLSVGMSNAKQAFLTGCSAGGLAAVVHCDDFRERLPQHATVKCLADASFFLDESDVQGNRTMRSFYDDVFHLQGVAKSLDKNCLSRMGNSSCLFPREFIKNIRTPVFIVNPAYDFWQIRNILVPDVSDPQGYWQTCRLNIHSCNPNQLEILKGFRNSLLNALSEFQQKNEAGMFVNSCYIHCQTWMAETWHSPSSPRINSKTIAESVGDWYFN…	6	13714432	13718771	1	aIC0AAA97AD10RM1_c							Cs6g06280.1	99.8
CitPAE6	Ciclev10028674m	ATGCAAGCTTATGATAATGCTTTAATGGTTGGACTCACCCTCATTCAAAGTGCTCGTGCCAAAGGAGCAGTCTGTTTAGATGGAACATTGCCTGGATATCACTTGCACCGTGGATATGGGTCAGGGGCAAATAGTTGGCTCATTCAATTAGAGGGAGGAGGATGGTGTAATAATGTTAGAAATTGTGTTTACCGTAAGAAGACTAGGCGTGGATCATCCTGGTATATGGAAAAGCGGATAGCATTTACAGGAATACTGAGCAATAAAGCTCAAGAGAATCCTGATTTTTTCAATTGGAATAGGGTGAAGCTTCGTTATTGTGATGGTGCATCTTTTACTGGAGACAGTGAGAATAAGGCTGCGGGACTACAATTTAGAGGACAACGTATATGGTTAGCT…	MQAYDNALMVGLTLIQSARAKGAVCLDGTLPGYHLHRGYGSGANSWLIQLEGGGWCNNVRNCVYRKKTRRGSSWYMEKRIAFTGILSNKAQENPDFFNWNRVKLRYCDGASFTGDSENKAAGLQFRGQRIWLAAMDDLMSKGMRHAHQALLSGCSAGGLASILHCDEFRDFFPRTTRVKCLSDAGLFLDAVDVSGGHTLRNLYSGVVGLQGVQNNLPRICTNHLDPTSCFFPQNIIRQVRTPLFILNAAYDSWQIQSSLAPPSADRHGHWHDCRLNHAKCSASQIRFLQGFRNQVLKAVRGFSMSKQNGLFINSCFAHCQTERQDTWFADDSPVVGNKAIAIAVGDWYFDRSGIKIVDCPYPCDKTCHNLVFQRA*	8	16674701	16678943	1	aCL7344Contig1	ATGAAGCTTTTGTTGGTTTCATTTGTTGTGTTGACTGCATTTGGCAAATGGGTTGATGGGTTCTTGGAGTTTAATGAAACAGAACTTTATCAAATTGAGAATTACAGGAGTGGTTATGTTAGTAATGGTTCTGTTTATGGGATCTCTAAAGCTTATGATAATGCTTTAATGGTTGGACTCACCCTCATTCAAAGTGCTCGTGCCAAAGGAGCAGTCTGTTTAGATGGAACATTGCCTGGATATCACTTGCACCGTGGATATGGGTCAGGGGCAAATAGTTGGCTCATTCAATTAGAGGGAGGAGGATGGTGTAATAATGTTAGAAATTGTGTTTACCGTAAGAAGACTAGGCGTGGATCATCCTGGTATATGGAAAAGCGGATAGCATTTACAGGAATA…	MKLLLVSFVVLTAFGKWVDGFLEFNETELYQIENYRSGYVSNGSVYGISKAYDNALMVGLTLIQSARAKGAVCLDGTLPGYHLHRGYGSGANSWLIQLEGGGWCNNVRNCVYRKKTRRGSSWYMEKRIAFTGILSNKAQENPDFFNWNRVKLRYCDGASFTGDSENKAAGLQFRGQRIWLAAMDDLMSKGMRHAHQALLSGCSAGGLASILHCDEFRDFFPRTTRVKCLSDAGLFLDAVDVSGGHTLRNLYSGVVGLQGVQNNLPRICTNHLDPTSCFFPQNIIRQVRTPLFILNAAYDSWQIQSSLAPPSADRHGHWHDCRLNHAKCSASQIRFLQGFRNQVLKAVRGFSMSKQNGLFINSCFAHCQTERQDTWFADDSPVVGNKAIAIAVGDWYFDR…	8	16674553	16678943	1	Cs6g01740.1	100
CitPAE7	Ciclev10030247m	ATGGTTGCTGCAAGAAGGGGCCTATGGTTCAGTCTTTTAGTATGTGCACTCATGTTGCTGAAAGCTCAAGGCTTTAGTGTACCAATCACCTATGTTGAGAATGGTGTATTTTGTTTGGACGGTAGGCCGCCTGCTTACCATTTTGATAAGGGGTTTGGTGCCGGGATCAACAATTGGTTGGTGTTCATCGAGGGAGGAGGCTGGTGCAACGATGTCACAACTTGTCATGTTCGTGCGAATACTGGTTTCGGTTCATCTAAGAAAATGGGCGAGGAAGTTAATTTTACTGGGATACTGAGCAACGAGCAGAAATATAACCCGGATTTCTACAATTGGAATAGAATCGAGGTTAAATACTGTGACGGGGCATCATTTACCGGAGATTTGGAGGCTGTCGAT…	MVAARRGLWFSLLVCALMLLKAQGFSVPITYVENGVFCLDGRPPAYHFDKGFGAGINNWLVFIEGGGWCNDVTTCHVRANTGFGSSKKMGEEVNFTGILSNEQKYNPDFYNWNRIEVKYCDGASFTGDLEAVDPATNLHFRGARVFLAVMKDLLMAILSGCSAGGLASILYCDNFRALFPVGTRVKCLADAGYFINVKDISDASHIEEFFAQVVATHGSIKHLPASCTQEVEPRIGKHCFFPQYVAGQVMTPLFIVNSAYDKWQVSTVLLIVIYCCEMILEIAYQTPFLSGL*	8	21239675	21241565	-1								Cs8g15640.1	62.3
CitPAE8	Ciclev10005117m	ATGAATGCAGCAGTAGAGATTGTGTTTATACTAGTTTTGTTGCTGAGCTTCGCGCCGTGGCTCATTTGTGCGAAGGACCGGCGGCTTGAGGTGAAAATGACTCTGGTTCAGAACGCTTCCGCTCATGGTGCCTTTTGCTTGGACGGGAGCTTGCCCGCTTATCATCTGCACAGAGGATTCGGAGCTGGAGCACGCAACTGGCTGTTACAGTTTGAGGGTGGTGGGTGGTGTAATGATATACCATCATGCCTGGAGAGAGCCCAAACACGCCGTGGATCGACGCGTTACATGACCAAATATGAGATCTTCTCCGGAATCCTAAGTAACAATGCCTCTCTAAATCCAGATTTCTACAACTGGAATAGAGTAAAGATAAGGTATTGTGATGGAGCCTCGTTT…	MNAAVEIVFILVLLLSFAPWLICAKDRRLEVKMTLVQNASAHGAFCLDGSLPAYHLHRGFGAGARNWLLQFEGGGWCNDIPSCLERAQTRRGSTRYMTKYEIFSGILSNNASLNPDFYNWNRVKIRYCDGASFAGNAKFDNGTSSLYFRGQKIWEAIILDLLPKGLANARKALLSGCSAGGLATFLHCDEFTKYLPNNASVKCLSDAGFFLDERDISLNHTMRSLYKEIVELQGVEQNLDKNCTKSLYIPELCFFPQYALRYITTPFFILNSAYDVFQFHHILVPPSADPRGHWNRCKLNPAACNAHQIDVLQGFRSDMLSALRFFFASSRRGGMFINSCFAHCQSESQDTWFAVDSPRVHNKTIAEAVGDWYFRGRVTKEIDCPYPCNNSCHNLIP*	9	29099689	29106227	-1	aCL6485Contig1							Cs9g17480.1	99.7

## Sheet: Polysaccharide Lyases
Gene name	Phytozome v10.2	CDS	peptide	Scaffold	Gene start	Gene end	Strand	Gene prediction	CDS	peptide	Scaffold	Gene start	Gene end	Strand	C. sinensis	% similarity
CitXXX.XX	INDUCED only in AZ-C
CitXXX.XX	INDUCED in both AZ-C and fruit rind
CitXXX.XX	INDUCED only in fruit rind
CitXXX.XX	REPRESSED only in AZ-C
CitXXX.XX	REPRESSED in both AZ-C and fruit rind
CitXXX.XX	REPRESSED only in fruit rind
CitXXX.XX	No hybridization results
PL1s Pectate-lyases
CitPL1	Ciclev10008571m	ATGTCAAGTTCCTTTCTCATTTCCTTGGTCATAGTTTTATTTCCAATCATGCAGATTCTAGAGGCACATGAAAGGAGCACAACGAGAAGGCAACTGGGGCCAGAATCTTGCAGAACCGGCAACCCAATTGATGACTGCTGGAGGTGTGATTCTGAATGGGAAAGTAACAGAAGAGCACTTGCCGATTGTACAGTTGGATTCGGACGCAATGCTGTTGGAGGCAGAGATGGTGAAATTTATATAGTCAAGTCCGAAGATGATGATCCAGTTGACCCAATTCCAGGCTCTCTTCGGTATGCCGTAATCCAAGAAGAACCCCTTTGGATAATCTTTGATCACGATATGGTCATCAACTTGAAGCAAGAACTAGTCATGAATTCATACAAGACCATAGATGGA…	MSSSFLISLVIVLFPIMQILEAHERSTTRRQLGPESCRTGNPIDDCWRCDSEWESNRRALADCTVGFGRNAVGGRDGEIYIVKSEDDDPVDPIPGSLRYAVIQEEPLWIIFDHDMVINLKQELVMNSYKTIDGRGFNVQMSNGPCISIYNVSNIIIHNIYIHDCVPAGSAVVRDSPKHYGPRGRSDGDGISIFGSRDIWIDHCTFSHCYDGLIDIVYGSTAITISNNYMFHHNEVMLMGHSDDFSADKNMQVTIAFNFFGDGLVQRMPRCRHGFFHIVNNIYTGWEMYAIGGSANPTINSQGNVFIASNDESTKEVTKHEIISEDDEWKKWNWRSEGDLMLNGAFFTPSGQETPASYMKASSMVARPATSLLTASSPSAGALSCRNSQPC*	1	23446759	23448254	-1	aC03011D06SK_c							Cs4g08770.1	99.5
CitPL2	Ciclev10015474m	ATGTCAAATATTTCAGTCTTTCTTATCTTCTTCTTCTCTCTTTTGATTCCTAATTTGGTTTCATCTTCATCAATTCAAGACCCCGAACTCGTTGCACAAGATGTGCACAGGAGCATCAATGCTTCTCGGCGGAACTTGGCCTATTTGTCTTGTGGAACTGGAAACCCTATTGATGATTGCTGGAGATGTGACCCAAATTGGGAGAGAAATCGCCAAAGATTAGCTGATTGTGCCATTGGATTTGGCAGGGATGCCATTGGAGGAAGAAATGGTCGAATTTATGTGGTCACTGACTCCGGCGACGATAACCCGACAAACCCGAAACCGGGGACTCTCAGGCATGCGGTGATTCAAGATGAGCCATTGTGGATTATATTCAATAGAGACATGGTGATTAAG…	MSNISVFLIFFFSLLIPNLVSSSSIQDPELVAQDVHRSINASRRNLAYLSCGTGNPIDDCWRCDPNWERNRQRLADCAIGFGRDAIGGRNGRIYVVTDSGDDNPTNPKPGTLRHAVIQDEPLWIIFNRDMVIKLNQELVMNSHKTIDGRGASVHIADGPCITIHFATNIIIHGIHIHDCKKAGNGNIRDSPEHSGWWDASDGDGVSIFSSQHIWIDHCSLSNCQDGLIDAIHGSTAITISNNYFTHHDKVMLLGHSDSYTQDKNMQATIAFNHFGEGLVQRMPRCRQGYFHVVNNDYTEWQMYAIGGSAAPTINSQGNRFFAPNERFRKEVTKHEDAPESEWRNWNWRSEGDLMLNGAYFRQTGAGASSTYARASSLNARPSTLVGPMTMRAGALNCRK…	2	15302834	15304872	-1								Cs2g23970.1	100
CitPL3	Ciclev10017878m	ATGGTTTCCTTAACCACTCTCCTTTGGCTTTCATGTCTACTAGCAAACTCTGCTTCAACCCTTGTAGCATATTCACTAGATAGCTATAACTTGCCTAAACCTGCAGTAAGCAGTTTGAAAGTCATGAATGTTATAGATTCATGCTGGAGAGCCAAATCCAACTGGGCTGTTAATCGCAAAGCCTTGGCGGATTGCGTGGTGGGGTTTGGAAAAGGCACCTTGGGAGGAAAATACGGTGCAATTTACGTAGTCACCGACCCTTCTGACGACCCTATAAATCCTAAATTGGGAACCCTAAGGTATGGTGTTATTCAAACAAATCCGCTTTGGATCATTTTTGCCAAGGACATGGTGATAAGGCTTAAAAATGAGCTTATAATGAATAGTTTTAAGACTATT…	MVSLTTLLWLSCLLANSASTLVAYSLDSYNLPKPAVSSLKVMNVIDSCWRAKSNWAVNRKALADCVVGFGKGTLGGKYGAIYVVTDPSDDPINPKLGTLRYGVIQTNPLWIIFAKDMVIRLKNELIMNSFKTIDGRGAKVEIANGPCITIQGVSHVIIHGISIHDCKPGKSGQVRSSPDHVGRRGGSDGDAIDIFASSYVWVDHCYLARAADGLIDVIHASTAVTISNNYFEQHDKVMLLGHNDQFTADKIMKVTIAFNHFGPGLIERMPRVRIGYAHVANNRYEDWKMYAIGGSANPTIFSEGNYFMASNDQNTKEVTKRESYGGWKSWKWRTSKDVFLNGAYFVPSGYGSCAPNYSRAQSFVVAPGAMVPALTANAGPLSCVVGKAC*	2	35528153	35529683	-1								Cs2g02770.1	98.5
CitPL4	Ciclev10020193m	ATGGCAGCTGCAAATGCAGGAATATTGTTAACTCTATTTGGTTTGGCTTCAATATCCCCGATCTTGAAGGCTAACACTCACGATTTCGATGAGGTGTGGCAGAAGCGAGCTGAAAATGCTAGAAGGCATGCCCTTGAAGCTTATCATCCAAATCCTGAAGAAGTCGTTAGTAGTTTCAATAAGCACGTTCACATGATGTTCGAAAATGGTAGTAGCACAAGGAGGTATCTGAGGGGACGTCCATATACAGGAAGATGCGCAGCCACAAACCCAATAGATCAGTGCTGGAGATGTGACAGAAACTGGGCTAATAACCGCAAGAGGCTAGCTGACTGTGCCCAAGGGTTTGGACGCGGCACCATTGGAGGCAAAAACGGTCCGTTTTACGTAGTAACAAAC…	MAAANAGILLTLFGLASISPILKANTHDFDEVWQKRAENARRHALEAYHPNPEEVVSSFNKHVHMMFENGSSTRRYLRGRPYTGRCAATNPIDQCWRCDRNWANNRKRLADCAQGFGRGTIGGKNGPFYVVTNPADDDLVNPKPGTLRHAVIQERPLWITFAHDMVIRLSEELLITSDKTIDARGSNVQIYNGAQITMQFVKNIIIHGLHIRKTKAGKGGMIRDSVSHHGFRSSSDGDGISMFGASHIWIDHVSMSGCQDGLIDAVMGSTAITVSNSHFTHQDHVMLLGASDSHPQDSIMQVTVAFNHFGKQLVQRMPRVRFGFAHVVNNDYTHWLMYAIGGSQHPTILSQGNRFLASNSHHSKEVTKRDSSPQSVWKTWNWRSEMDLMMNGAFFVESG…	3	2263801	2265408	-1	aC02009D04SK_c							Cs5g04220.1	99.5
CitPL5	Ciclev10020423m	ATGGCAATCCCTTCTCCTTCTCTTAGCATCTTCCTCCTCTTTCTCATGACCCCAGCTCTCATTTTAGCTTCCGCAGTTCCGGACCCAGAATTAGTCGTACACGAAGTACACAAGAGCATCAATGCGTCTAGGAGGAACCTGGGTTACTTGTCTTGCGGAACCGGCAATCCGATTGACGATTGCTGGCGGTGCGACCCCAACTGGGAGAAGAACAGGCAAAGGTTGGCGGATTGTGCGATTGGGTTCGGCAAGAATGCGGTTGGTGGACGTGATGGTAGAATTTATGTGGTCACTGACCCCGGTGACTATGACGTCGTAAACCCTAAACCCGGAACTCTAAGGTACGCTGTGATCCAAGATGAGCCGTTATGGATCATTTTCGCTCGTGATATGACCATC…	MAIPSPSLSIFLLFLMTPALILASAVPDPELVVHEVHKSINASRRNLGYLSCGTGNPIDDCWRCDPNWEKNRQRLADCAIGFGKNAVGGRDGRIYVVTDPGDYDVVNPKPGTLRYAVIQDEPLWIIFARDMTIRLKEELIMNSFKTIDGRGASVHIAGGPCITIQYVTNIIIHGLNIHDCKKGGNAMVRDSPRHFGWRTVSDGDGVSIFGGTHVWVDHCSLSNCDDGLVDAIHGSTAITISNNFMTHHDKVMLLGHSDTYTQDKNMQATIAFNHFGEGLVQRIPRCRHGYFHVVNNDYTHWEMYAIGGSANPTINSQGNRFAAPDRAFSKEVTKHEDAPESEWRNWNWRSEGDLMVNGAFFTASGAGASSSYARASSLGARPSALVGPITGSAGALICK…	3	3890333	3893103	-1	aIC0AAA15AF11RM1_c							Cs5g06600.1	89.5
CitPL6	Ciclev10024272m	ATGGCAATATTGTGGCATTTTGCTATAGTTGTTTCCATTGCCATTGTTTTCATCCCTACATCTACTCTTCCCATGAACGTGACTGATCAATGTTGGAGGAAAAATCCTAACTGGCACATGCATCAATGCCAGGTCGCTACATGTTCCATGAGTTTTTCTGGAAAGATAACCGATAATGTTGGTAAAGACATAGTACATTACAAAGTCACTGATCCTGGTGATGATACTATAAACCCTAAACTTGGAACCCTAAGATATGGAGCCACATTGATTCCACAAAAAGGCCCAAGCCCTGTGATGAGTCCAAACAGAAAGATAATGCAACTGGGAAAATTTGACGGAGATGCAATCAGGCTAGTGACAACATCAAAGGTTTGGATAGATCACAACATACGATAT…	MAILWHFAIVVSIAIVFIPTSTLPMNVTDQCWRKNPNWHMHQCQVATCSMSFSGKITDNVGKDIVHYKVTDPGDDTINPKLGTLRYGATLIPQKGPSPVMSPNRKIMQLGKFDGDAIRLVTTSKVWIDHNIRYECQDGLIDVRRGSTDVTISNNWFRNQEKRQNMKVIVVNNHFGPNRNQRLPGYTQYAIGGSMNPSIKSQANLLIAPKVGNKKITWSQGDSKKFFPVGDLFKN	3	18670936	18672420	1	Phytozome v10.2	ATGGCAATATTGTGGCATTTTGCTATAGTTGTTTCCATTGCCATTGTTTTCATCCCTACATCTACTCTTCCCATGAACGTGACTGATCAATGTTGGAGGAAAAATCCTAACTGGCACATGCATCAATGCCAGGTCGCTACATGTTCCATGAGTTTTTCTGGAAAGATAACCGATAATGTTGGTAAAGACATAGTACATTACAAAAATTACATGAACATCACACTCCACAAATCGCTAATTATCAGTAGTTTAAGTACCATTGACCATCGAGGTGTCAACATCCACATTACAGGCATTGCATGCCTTATGGTATACAAGGGCCCAAGCCCTGTGATGAGTCCAAACAGAAAGATAATGCAACTGGGAAAATTTGACGGAGATGCAATCAGGCTAGTGACA…	MAILWHFAIVVSIAIVFIPTSTLPMNVTDQCWRKNPNWHMHQCQVATCSMSFSGKITDNVGKDIVHYKNYMNITLHKSLIISSLSTIDHRGVNIHITGIACLMVYKGPSPVMSPNRKIMQLGKFDGDAIRLVTTSKVWIDHNIRYECQDGLIDVRRGSTDVTISNNWFRNQEKRQNMKVIVVNNHFGPNRNQRLPGQAIFLTWYENQCLKTQYAIGGSMNPSIKSQANLLIAPKVGNKKITWSQGDSKKFFPVGDLFKNGASSQKHIFELHRGTNISSCRCQVCEVIDK*	3	18670936	18672513	1	¾	¾
CitPL7	Ciclev10019202m	ATGGGCTTACGGGCAAATACACATTCTACGGAATGCGCCTACGGGCAAATACACATTCTACGGAATGCGCCTCCGGGCAAATACACATTCTACGGAATGCGCCTCCGGGCAAATACACATTCTACGGAATGCGCCTACGGGCAAATACACATTCTACGGAATGGGCCTACGGGCAAATACACATTCTACGGACTGCGCCTACGGGCAAATATACATTATACGAAATGCGCATATGGGCAAATATATGTATTTTACGGAATGCACTTACGGGCAGAATGCACTTACGGGCAAAATGTTACAAAATCAATCCTCTTTCCTTATCTAAGCAATTTCTATGAAATTTTCCGATTAAGAAAATTAGTGAAACATATTGAACCACTATGTTATCCCATTGTGAAC…	MGLRANTHSTECAYGQIHILRNAPPGKYTFYGMRLRANTHSTECAYGQIHILRNGPTGKYTFYGLRLRANIHYTKCAYGQIYVFYGMHLRAECTYGQNVTKSILFPYLSNFYEIFRLRKLVKHIEPLCYPIVNDNLNPSKLWALVIARPITKTDLFDFALRKPSRRDQIAFYLTQFRSIFFSFSQFINTRRERERERATVTVKERTRESSEAATMVVSYQIRFSVCTLLILWLFVTANASTEKHELDSRFLKNEQLQSSNNSSMPERIEFDDEEWTHEHAVDNPDEIAATVDMAIRNSTERRKLGYFSCGTGNPIDDCWRCDSRWYLRRKRLADCAIGFGRNAVGGRDGRYYVVSDPGDDDAVNPKPGTLRHAVIQDRPLWIVFKRDMVITLKQELIMN…	3	42509539	42515993	1	aCL4259Contig1	ATGGTGGTTTCTTATCAAATACGGTTCTCTGTATGTACATTGCTGATTCTATGGCTGTTTGTTACAGCTAATGCCTCAACGGAGAAGCACGAGCTAGATTCAAGGTTCTTGAAAAATGAGCAGTTGCAGAGCTCGAACAACTCATCAATGCCGGAGAGGATTGAATTCGATGATGAGGAGTGGACTCATGAGCACGCTGTTGATAATCCGGATGAAATTGCTGCTACGGTGGACATGGCAATTCGCAATAGCACTGAAAGGAGAAAATTGGGATATTTCTCATGTGGAACCGGCAACCCAATTGATGATTGCTGGCGCTGTGATAGCCGGTGGTATTTGCGCCGAAAGCGGCTTGCTGACTGTGCCATCGGTTTTGGACGCAACGCCGTCGGTGGCCGC…	MVVSYQIRFSVCTLLILWLFVTANASTEKHELDSRFLKNEQLQSSNNSSMPERIEFDDEEWTHEHAVDNPDEIAATVDMAIRNSTERRKLGYFSCGTGNPIDDCWRCDSRWYLRRKRLADCAIGFGRNAVGGRDGRYYVVSDPGDDDAVNPKPGTLRHAVIQDRPLWIVFKRDMVITLKQELIMNSFKTIDGRGVNVHIANGACITIQFITNVIIHGINIHDCKPTGNAMVRSSPSHYGWRTMADGDAISIFGSSHIWIDHNSLSNCADGLIDAIMGSTAITVSNNYFTHHNEVMLLGHSDSYTRDKVMQVTIAYNHFGEGLIQRMPRCRHGYFHVVNNDYTHWVMYAIGGSANPTINSQGNRYLAPENTFAKEVTKRVDTSTAVWRGWNWRSEGDMLL…	3	42507453	42515993	1	Cs5g34710.1	100
CitPL8	Ciclev10032073m	ATGGTGACGCTTCCGTACGCTCAAGTGGATTCTTGCCTGAGAGCATTGGCCGGCCAGGCCGAGGGTTTCGGTCGGTTCGCCATCGGTGGGCTTCACGGCCTGGTCTACTTCGTCACCAATTTATCCGATGATGGTCCGGGATCGCTTCGTGAGGGATGCCGGAGAAAAGAACCGTTATGGATTGTTTTTGAAGTTTCGGGTACTATTCATCTTTCATCTTACTTGAGTGTGTCGTCTTATAAGACGATTGATGGCCGCGGGCAGAGGATTAAACTCACGGGGAAGGGGTTAAGATTGAAGGAATGTGAACATGTTATTATATGCAATCTTGAGTTTGAAGGTGGTAGAGGACATGATGTTGATGGCATTCAAATTAAGCCGAATTCTAGGCACATATGG…	MVTLPYAQVDSCLRALAGQAEGFGRFAIGGLHGLVYFVTNLSDDGPGSLREGCRRKEPLWIVFEVSGTIHLSSYLSVSSYKTIDGRGQRIKLTGKGLRLKECEHVIICNLEFEGGRGHDVDGIQIKPNSRHIWIDRCSLRDYDDGLIDITRQSTDITVSRCYFTQHDKTMLIGADPSHVGDRCIRVTIHHCLFDGTRQRHPRLRFGKVHLYNNYTRNWGIYAVCASVESQIYSQCNIYEAGQKKRTFEYYTEKAADKLEAKSGLIRSEGDIFLKGAQAQLLTGVGEECVFHPSEYYPTWTMEAPSDSLKQILQICTGWQSIPRPADVMIAN*	4	3290273	3293928	-1	aIC0AAA64DG12FM1_c							Cs7g28180.2	100
CitPL9	Ciclev10031337m	ATGCTTCTAAACACCTGCATTCTCTTAGAATGCCTCTTCTTCCTCATTTTCTCCTCTTCTGCTACAATTTCTTCCCTCAATCTCACTTTACCCCATCAGCATCCTGACCCTGACGCTGTTGCTCAAGATGTGCAAAGGAGAGTTAATGTATCTCTATCAAGAAGACAAGCGCTCGCCATTAACGCCCAATGCCAAACCGGAAACCCCATCGACGACTGCTGGCACTGCGACCCAAACTGGGCAGCAAACCGGCAACGGTTAGCCGACTGCAGCGTCGGCTTCGCCCAAGGTACCCTCGGCGGCAAAGGCGGCCAGATCTACGTCGTCACCGACTCCTCCGACAGCGACCCGGCGAACCCCACGCCGGGCACCCTCCGCCACGCCGTCATCCAAACGGAA…	MLLNTCILLECLFFLIFSSSATISSLNLTLPHQHPDPDAVAQDVQRRVNVSLSRRQALAINAQCQTGNPIDDCWHCDPNWAANRQRLADCSVGFAQGTLGGKGGQIYVVTDSSDSDPANPTPGTLRHAVIQTEPIWITFASNMLIKLKHELIINSYKTIDGRGANVEITGNGCLTLQYVSHVIIHNVHIHHCKPSGNTMIASSPTHVGYRGKSDGDGISIFGSQKIWVDHCSLSYCTDGLIDAIMGSTGITISNNYFSHHNEVMLLGHNDKYALDMGMQVTIAFNHFGVALVQRMPRCRRGYIHVVNNDFTSWEMYAIGGSANPTINSQGNRYTAPPDDNAKEVTKRVETDESEWAGWNWRTEGDVMVNGAFFVPSGVGLSTQYAKASSVEPKSAALID…	4	7060367	7066219	-1	aCL1131Contig2							Cs7g21940.1	100
CitPL10	Ciclev10031653m	ATGCCCTGCTTATCAGCTCATATCGCTGAGGTCGACGAGGTATGGAGGCGACGAGCTGAAGAAGCCATGCAGACCACCGAGCAATATTATGATCCAAACCCCGTAGCTGTTGCCAACCACCTAAACATGAAAGTTCAAGATTTGTCAAAGCAAGCTATTGCCAAGCGGGGCTTATTGAATGCAGAATCAGGGCAATGCGAGGCAACAAACCCAATTGACAAATGCTGGCGTTGTAAAGAGAACTGGGCAGAAGATCGACAGGCGCTAGCAGGTTGTGCACTTGGTTTCGGCAGCAAAGCCACCGGAGGAAAAGGTGGAAAAATTTATGAGGTGACTGATCCTTCTGATAATGATATGGAGAACCCTAAGGTTGGGACTCTACGCCATGCAGTGATCCAA…	MPCLSAHIAEVDEVWRRRAEEAMQTTEQYYDPNPVAVANHLNMKVQDLSKQAIAKRGLLNAESGQCEATNPIDKCWRCKENWAEDRQALAGCALGFGSKATGGKGGKIYEVTDPSDNDMENPKVGTLRHAVIQKEPLWIIFAKDMNIKLQQELIVQGSKTIDGRGAKVHIANGAGIMLQFVKNVIIHGIHIHNISPCSGGMIRDSVDHVGKRGQSDGDAVSIFGSSNIWLDHLTLSQAHDGLIDAIQASTAITISNCHLSNHDKAILLGASDTFTEDKKMQVTVAFNRFDKGLVQRMPCVRFGFAHVVNNDYNQWEMYAIGGLQGPTILSQGNRFFASNNQNAKEVTKRMNCSPEEGKSWIWRSEGDVLLNGAYFNSSGDPKKQIQYQMDNVIKPESGT…	4	18116848	18118720	-1	aC32106E01EF_c	ATGGAGCTAGCTGGGCTAAGATTAATCTTTCTCTTCTCCTTTGCCACTTTAATGCCCTGCTTATCAGCTCATATCGCTGAGGTCGACGAGGTATGGAGGCGACGAGCTGAAGAAGCCATGCAGACCACCGAGCAATATTATGATCCAAACCCCGTAGCTGTTGCCAACCACCTAAACATGAAAGTTCAAGATTTGTCAAAGCAAGCTATTGCCAAGCGGGGCTTATTGAATGCAGAATCAGGGCAATGCGAGGCAACAAACCCAATTGACAAATGCTGGCGTTGTAAAGAGAACTGGGCAGAAGATCGACAGGCGCTAGCAGGTTGTGCACTTGGTTTCGGCAGCAAAGCCACCGGAGGAAAAGGTGGAAAAATTTATGAGGTGACTGATCCTTCTGAT…	MELAGLRLIFLFSFATLMPCLSAHIAEVDEVWRRRAEEAMQTTEQYYDPNPVAVANHLNMKVQDLSKQAIAKRGLLNAESGQCEATNPIDKCWRCKENWAEDRQALAGCALGFGSKATGGKGGKIYEVTDPSDNDMENPKVGTLRHAVIQKEPLWIIFAKDMNIKLQQELIVQGSKTIDGRGAKVHIANGAGIMLQFVKNVIIHGIHIHNISPCSGGMIRDSVDHVGKRGQSDGDAVSIFGSSNIWLDHLTLSQAHDGLIDAIQASTAITISNCHLSNHDKAILLGASDTFTEDKKMQVTVAFNRFDKGLVQRMPCVRFGFAHVVNNDYNQWEMYAIGGLQGPTILSQGNRFFASNNQNAKEVTKRMNCSPEEGKSWIWRSEGDVLLNGAYFNSSGDPK…	4	18116848	18118720	-1	Cs7g14670.1	100
CitPL11	Ciclev10031429m	ATGGTAGACAATTGTGTGGTGTATACGTGGCTGATTTTCCTTTCAGAGAAAGACGAGGAATTATTACTAGCGGCCGAAACTAGCACAATGGGACCCCTTAGGAGTAGAAACCAACTTTCCCATACTTGTATCCATCCACTCCACTCTCCCCTTTACTTCATTTTCTTTCCTAGCAGAGAGAAAGTGAGAGAGATTGAACAAATGGCAATTCCACTCTTGCTTTGGTTGCTCTTGTGCCTTTTAGCTCCAACCTTCATTTCCTCTTCACCAGTTCAAGATCCTGAATTAGTAGTGGAAGAAGTACACAAAAGCATCAATGCGTCTAGGAGGAGTTTGGGGTTTCTGTCGTGTGGGACCGGCAATCCGATCGACGACTGCTGGCGGTGTGACCCGAAGTGG…	MVDNCVVYTWLIFLSEKDEELLLAAETSTMGPLRSRNQLSHTCIHPLHSPLYFIFFPSREKVREIEQMAIPLLLWLLLCLLAPTFISSSPVQDPELVVEEVHKSINASRRSLGFLSCGTGNPIDDCWRCDPKWEENRQQLADCAIGFGKQAIGGKDGKIYVVTDSGDDDPVNPKPGTLRYAVIQDEPLWIIFARDMVITLKEELIMNSFKTIDGRGASVHIAGGPCITIQYVTNIIIHGINIHDCKRGGNANVRDSPSHYGWRTISDGDGVSIFGGSHVWVDHCSLSNCNDGLIDAIHGSTAITISNNYMTHHNKVMLLGHSDTFTQDKNMQVTIAFNHFGEGLVQRMPRCRHGYFHVVNNDYTHWEMYALGGSASPTINSQGNRFVAPNDRFNKEVTK…	4	21857650	21859855	1	aCL2128Contig1	ATGGCAATTCCACTCTTGCTTTGGTTGCTCTTGTGCCTTTTAGCTCCAACCTTCATTTCCTCTTCACCAGTTCAAGATCCTGAATTAGTAGTGGAAGAAGTACACAAAAGCATCAATGCGTCTAGGAGGAATTTGGGGTTTCTGTCGTGTGGGACCGGCAATCCGATCGACGACTGCTGGCGGTGTGACCCGAAGTGGGAAGAGAACCGGCAGCAGCTAGCGGATTGCGCCATCGGGTTCGGCAAGCAGGCCATTGGTGGGAAAGATGGTAAGATATATGTTGTTACGGACTCCGGTGACGATGACCCAGTGAACCCAAAGCCAGGCACTCTGAGGTATGCTGTGATCCAAGACGAGCCCCTATGGATCATTTTCGCACGTGACATGGTGATCACATTG…	MAIPLLLWLLLCLLAPTFISSSPVQDPELVVEEVHKSINASRRSLGFLSCGTGNPIDDCWRCDPKWEENRQQLADCAIGFGKQAIGGKDGKIYVVTDSGDDDPVNPKPGTLRYAVIQDEPLWIIFARDMVITLKEELIMNSFKTIDGRGASVHIAGGPCITIQYVTNIIIHGINIHDCKRGGNANVRDSPSHYGWRTISDGDGVSIFGGSHVWVDHCSLSNCNDGLIDAIHGSTAITISNNYMTHHNKVMLLGHSDTFTQDKNMQVTIAFNHFGEGLVQRMPRCRHGYFHVVNNDYTHWEMYALGGSASPTINSQGNRFVAPNDRFNKEVTKYEDAPESEWKNWNWRSEGDLMVNGAFFTPSGAGASSSYAKASSLGARPSSLISSITAGAGSLNCRKG…	4	21857282	21859855	1	Cs7g09860.1	100
CitPL12	Ciclev10011635m	ATGTTTCAAAGAACCTGCATTGTCCTAATTTCTCTCTTAAGCTCATTTTCTCCACAAGGCAGAGCAATGCTCAATCTCACTTTTCCCATTCCGCATCCCAATCCTGAAGACGTAGCTCAAGATGTTCACAGGAGAGTAAACGCTTCAGTGTCAAGAAGGCAAATGCTACAAATTTCTGAAAAAGATCAATCCCCAGCAGCCACATGCTTCACTGGCAACCCCATAGACGACTGCTGGAAATGTGACCCTGACTGGGCCAACAACCGCCAGAGACTCGCCGACTGCGTTATCGGCTTCGGCCAGTACGCAATGGGCGGCAAAGGCGGTGAATATTACATCGTCACCGATTCATCAGATGATGATGCTGTCAGCCCCAAGCCAGGCACGCTGAGATATGCT…	MFQRTCIVLISLLSSFSPQGRAMLNLTFPIPHPNPEDVAQDVHRRVNASVSRRQMLQISEKDQSPAATCFTGNPIDDCWKCDPDWANNRQRLADCVIGFGQYAMGGKGGEYYIVTDSSDDDAVSPKPGTLRYAVIQPQPLWIVFPSNMLIKLSQELIFNSYKTLDGRGANVHITGGGCITLQYISNVIIHNIHIHHCVESGNANVRSSPTHYGYRTKSDGDGISIFGSKDLWIDHCSLSHCKDGLIDAVMGSTGITISNNYFSHHNEVMLLGHSDDYLPDSGMQVTIAFNHFGEKLVQRMPRCRRGYIHVVNNDFTEWEMYAIGGSGNPTINSQGNRYTAPTNRNAKEVTKRVDTAESHWRDWNWRSEGDVMVNGAFFVASGAGVEVKYERAFSVEPKS…	6	3807371	3811072	-1	aCL6343Contig1							orange1.1t00910.1	100
CitPL13	Ciclev10013750m	ATGCAAATGGAGCTAACTAAGCTAAGATTATTCTTTCTCTTCTCTTTTGCCGCTTTGATCCCTTGCCTATCAGCTAATATCAGTGAGGTCGATGAGGTATGGAGGAGACGAGCTGAAGAAGCCATGCAGACCACTGAGCAGTACTATGATCCAAACCCCGTAGCTATTGCCAGCCACCTGAACATGAAAGTTCAAGATTTGTCAAAGCAGACTGCTGCTAGGAGGGGCTTGTTGAATGCAGAATCAGGGCAATGCGAGGCAACAAATCCAATTGACAATTGCTGGCGTTGTAAAGAGAACTGGGCAGAAAATCGACAAGCGTTGGCGGGTTGCGCACTCGGTTTCGGCATCAAAGCCACTGGAGGAAAAGGTGGAAAAATATATGAGGTGACTGATCCT…	MQMELTKLRLFFLFSFAALIPCLSANISEVDEVWRRRAEEAMQTTEQYYDPNPVAIASHLNMKVQDLSKQTAARRGLLNAESGQCEATNPIDNCWRCKENWAENRQALAGCALGFGIKATGGKGGKIYEVTDPSDNDMENPKVGTLRHAVIQKEPLWIIFAKDMNIKLQQELIVQGKKTIDGRGANVHIANGAGFMLQFVQNVIIHGIHIHNISPRSGGMIRDSVDHVGKRGQSDGDAVSIFGSSNIWLDHLTLSQAHDGLIDAIQASTAITISNCHFSNHDKAILLGASDTFTEDKKMQVTVAFNRFDKGLVQRMPCVRFGFAHVVNNDYNQWEMYAIGGLKGPTILSQGNRFFASDNQNTKEVTKRMNCSPEEGKSWIWRSEGDVFLNGAYFNSSGD…	6	12637254	12639056	-1								Cs6g05390.1	99.5
CitPL14	Ciclev10011951m	ATGGGAAACTCACACGGGCATCATCATCATCACCGTAACGAAGCTAACAGTTACTTCCCACACCAAACGCCTACTCCTACCCCTCCGCCCTTTAAATTTGGCCCGTCTGATCATCATCAACATCAACCTGCAGCACAATTTCAGAACAACTCGACGATGTCATTGCCTTACGCTCACGTTGATTGCAGCTTACGTGCTCTCGCCGGCCAGGCCGAAGGGTTCGGTCGCCTCGCCATTGGCGGTCTCCACGGACCCCTCTACCACGTCACCACTTTAGCTGATGACGGGCCAGGATCACTTCGAGAAGGATGCCGCATGAAAGAACCTCTTTGGATTGTCTTTGAAGTGTCAGGCACCATTCATCTCCGCTCTCACTTGAGTGTCTCATCTTACAAAACC…	MGNSHGHHHHHRNEANSYFPHQTPTPTPPPFKFGPSDHHQHQPAAQFQNNSTMSLPYAHVDCSLRALAGQAEGFGRLAIGGLHGPLYHVTTLADDGPGSLREGCRMKEPLWIVFEVSGTIHLRSHLSVSSYKTIDGRGQRVKLTGKGLRLKECEHVIICNLEFEGGKGPDVDAIQIKPKSKHIWIDRCSLRDYDDGLIDITRESTDITVSRCHFSSHDKTMLIGADPSHVADRCIRVTIHHCFFDGTRQRHPRVRYAKVHLYNNYTRNWGIYAVCASVDSQIYSQCNIYEAGQKKMAFKYLTEKASDKEEARSGCIRSEGDLFITGTQAGLMTEAGEHSMFHPSEYYPTWTVAAPTDNLKQVLQHCTGWQDIQRPADQPVAAQ*	6	12700076	12705209	1	aCL3094Contig1							Cs6g05430.1	100
CitPL15	Ciclev10013497m	ATGGAGTTGATAAGGTTGAGCTTGATTTTTTACTTCTTCCTTGCCACCTTGGTTCCATGCCTCTCGGCCCATATGGCCGACTCCAATGAAGCATTTTTAGGAGGGAACATTATAAGGAGGAAATTGTTGAGGCATGAAAAACACAATGGACCGCGCGTTGCAACAAACCTAATAGTCTGGTGCTGGCGGTGTCAAAATGACTGGGCCAACAACCGCCATAAACTGGCCGATTGCACCCTTAGTTTCGACAAACATGCCACCGGTGGAAAGCATGGACCTATTTATATGGTGACTAATAGTTCTAATAACCAACGTGATCATAAAAACCCTAAATTATGGACCTTACGCCTCTTTGTGACCCAGAAAGGACCTTTGTGGATCATCTTTGAACGTAATATA…	MELIRLSLIFYFFLATLVPCLSAHMADSNEAFLGGNIIRRKLLRHEKHNGPRVATNLIVWCWRCQNDWANNRHKLADCTLSFDKHATGGKHGPIYMVTNSSNNQRDHKNPKLWTLRLFVTQKGPLWIIFERNISIKSMATLIIGELGNKTIDGRGVDVHNAHGGGIGTHQVKNVIIHGLHIHNIVHVHGSGDGDGISIYGSIAIIISNSHFIKHDKVILLSASDTFEEDKKMQMRITYNHFDKELIYGVFDFVHVMNNDHTHWKILGNKFIALYNDYAKQVTMRDASSKYDEIQRSEGDIFDNGAFFNQSGDPSWKILFHIENEMIKAKLRAYVEWFIRFVGALKCSLVKEC*	6	24578920	24582479	1								Cs6g20720.1	49.4
CitPL16	Ciclev10011762m	ATGGAGCTTGCTAGGCTAAAATTAATCTTTCTTTTCTCTTTTATCATTTTGATCCCTTGCCTATCGGCTATCGCCGAGGCCGACGAGGTATGGAGGCGACGAGCTGAAGAAGCCATGCAGACCACTGAGCAGTACTATGATCCAGACCCTGTAGCTGTTGCCAGCAACTTGAACATGAAAGTTCAAGACTTGTCAAAGCAGACTGCTGCCAGACGGGGCTTGTTGAATGCAGAATCAGGGCAATGTGAGGCAACAAACCCAATTGACAAATGTTGGCGTTGCAAAGAGAACTGGGCAGAAGATCGGCAGGCGCTAGCAGGTTGCGCGCTTGGTTTCGGCAGTAAAGCTACCGGAGGAAAAGGTGGAAAAATTTATGAGGTGACTGATTCTTCTGACAAT…	MELARLKLIFLFSFIILIPCLSAIAEADEVWRRRAEEAMQTTEQYYDPDPVAVASNLNMKVQDLSKQTAARRGLLNAESGQCEATNPIDKCWRCKENWAEDRQALAGCALGFGSKATGGKGGKIYEVTDSSDNNMENPKVGTLRHAVIQKEPLWIIFAKDMNIKLQQELVVQGNKTIDGRGANVHIANGAGIRLQFVQNVIIHGIHIHNISPASGGMIRDSVDHVGNRGPSDGDAVSVFSSSNIWLDHLTLSKAQDGLIDAIQGSTAITISNCHLSNHDKAILLGATDTFTEDKKMQVTVAFNRFDKGLVQRMPCIRFGFAHVVNNDYNQWEMYAIGGLKGPTILSQGNRFFASDNKNAKEVTKRMDCSPEEGNGWIWRSEGDVFLNGAYFNASGDPKK…	6	24585037	24586992	1								Cs6g20750.1	99.8
CitPL17	Ciclev10011763m	ATGGAGCTTGCTAGGCTAAAATTAATCTTTCTTTTCTCTTTTATCATTTTGATCCCTTGCCTATCGGCTATCGCCGAGGCCGACGAGGTATGGAGGCGACGAGCTGAAGAAGCCATGCAGACCACTGAGCAGTACTATGATCCAGACCCTGTAGCTGTTGCCAGCAACTTGAACATGAAAGTTCAAGACTTGTCAAAGCAGACTGCTGCCAGACGGGGCTTGTTGAATGCAGAATCAGGGCAATGTGAGGCAACAAACCCAATTGACAAATGTTGGCGTTGCAAAGAGAACTGGGCAGAAGATCGGCAGGCGCTAGCAGGTTGCGCGCTTGGTTTCGGCAGTAAAGCTACCGGAGGAAAAGGTGGAAAAATTTATGAGGTGACTGATTCTTCTGACAAT…	MELARLKLIFLFSFIILIPCLSAIAEADEVWRRRAEEAMQTTEQYYDPDPVAVASNLNMKVQDLSKQTAARRGLLNAESGQCEATNPIDKCWRCKENWAEDRQALAGCALGFGSKATGGKGGKIYEVTDSSDNNMENPKVGTLRHAVIQKEPLWIIFAKDMNIKLQQELVVQGNKTIDGRGANVHIANGAGIRLQFVQNVIIHGIHIHNISPASGGMIRDSVDHVGNRGPSDGDAVSVFSSSNIWLDHLTLSKAQDGLIDAIQGSTAITISNCHLSNHDKAILLGATDTFTEDKKMQVTVAFNRFDKGLVQRMPCIRFGFAHVVNNDYNQWEMYAIGGLKGPTILSQGNRFFASDNKNAKEVTKRMDCSPEEGNGWIWRSEGDVFLNGAYFNASGDPKK…	6	24596475	24598576	1	aIC0AAA38CG08RM2_c							Cs6g20750.1	99.8
CitPL18								FGENESH	ATGAAGCTAGCTAGGCTAAGATTAATCTTTCATTTCTCCTTTGTTGTTTTGATCCCTTGCCTATCGGCTAATATCGCCGAGGTCGACGAGCGGCAGCAAGATGAAAAAGCCATGGACACCACCATTGAGGCCTATGATCATAATCCCCAAGCAATTATCAATGATCACTTTAATTTCCCCTATATTAAGGAGCCCGGTTTGTACAGATTCTTGGAAGTAAACAGTACAATGAGGAGCATGTTGAGGCGTGGGAAATATTGGGGACCATGCCAAGCAACAAACCCAGTAGACCGTTGCTGGCGTTGTTGGAAAGACTGGGCCAACTACCGCCCCAAGCTCGCTGACTGCGTGCCTGGTTTCGGCCACAAGATCACTGGAGGACAGAAAGGACCAATCTAT…	MKLARLRLIFHFSFVVLIPCLSANIAEVDERQQDEKAMDTTIEAYDHNPQAIINDHFNFPYIKEPGLYRFLEVNSTMRSMLRRGKYWGPCQATNPVDRCWRCWKDWANYRPKLADCVPGFGHKITGGQKGPIYIVTDSSDNDFINSKPGTLCHAVIQNGPLWIIFARDMHIKLSQELIMTNDKTIDARGADVHIAYGAGIMIQHVKNVILLGASDSYAPDKMMQVTIAYNHFGRGLIQRMPRCRLGIFHVVNNDYTHWQMYAIGGCKNPTITSQGDRFIAPDDSSAKEVTKRDYAANEYMMNGSTGFGDQREIYS*	6	24602708	24605242	1	¾	¾
CitPL19	Ciclev10004783m	ATGGAGAATGGAGAGTCTATAAGAGGGCCGTTTTGTTGGAGCACGTACCAGACTGACTCTGCAGAAGACACTCACACACACATTTCTTCTCTCTCTCTCTCTCTTTCTCTGCTGCTTTTTCTTTCTTCCTTTCTTTTTTTTCTCGGTTGTGTTTGGGGAGTGGGAAAGAGAGAGAAAATCAAAGAAAACAACGCAATGGCGGTGACGCAGCGTGGCATTTGTCTCTGTTTTGCCGTCGTTTTGATGTTGTTCGTCGGCGTTCTGGCTTCTGTACGTAACGAACAAGACGTCTCTGTTTCCAGGAAGATGAAGGCAGAGAGCTCAATGAACTCAACAATGGCGGCCAAAGCTGAAGTAGTAGCCGAGGCCTTGAGTAAACATGCAGTTGATAACCCAGAT…	MENGESIRGPFCWSTYQTDSAEDTHTHISSLSLSLSLLLFLSSFLFFLGCVWGVGKREKIKENNAMAVTQRGICLCFAVVLMLFVGVLASVRNEQDVSVSRKMKAESSMNSTMAAKAEVVAEALSKHAVDNPDEIASMVEMSTRNSTERRKLGYFSCGTGNPIDDCWRCDGNWHKNRKRLADCGIGFGRNAIGGRDGRFYVVTDPRDDDPVNPKPGTLRHAVIQDKPLWIVFKRDMVIQLKQELIVNSFKTIDGRGANVHIANGGCITIQFVTNVIIHGLHVHDCKPTGNAMVRSSPTHYGWRTVADGDAISIFGSSHIWIDHNSLSHCADGLVDAVMGSTAITISNNHMTHHNEVMLLGHSDSYTRDKQMQVTIAYNHFGEGLIQRMPRCRHGYFHVV…	9	9772905	9777496	-1	aCL4999Contig1	ATGGCGGTGACGCAGCGTGGCATTTGTCTCTGTTTTGCTGTCGTTTTAATGTTGTTCGTCAGCGTTCTGGCTTCTGTACGTAACGAGCAAGACGTCTCTGTTTCCAGGAAGATGAAGGCAGAGAGCTCAATGAACTCAACAATGGCGGCCAAGGCTGAAGTAGTAGCCGAGGCCTTGAGTAAACATGCAGTTGATAACCCAGATGAAATTGCTTCAATGGTTGAGATGAGCACCCGCAACAGCACTGAAAGGAGAAAGTTGGGGTACTTCTCCTGTGGTACTGGTAATCCCATTGATGACTGCTGGCGCTGTGACGGCAACTGGCACAAGAACCGCAAGCGTCTTGCAGACTGTGGGATTGGTTTTGGAAGAAATGCCATTGGTGGCCGTGATGGTCGC…	MAVTQRGICLCFAVVLMLFVGVLASVRNEQDVSVSRKMKAESSMNSTMAAKAEVVAEALSKHAVDNPDEIASMVEMSTRNSTERRKLGYFSCGTGNPIDDCWRCDGNWHKNRKRLADCGIGFGRNAIGGRDGRFYVVTDPRDDDPVNPKPGTLRHAVIQDKPLWIVFKRDMVIQLKQELIVNSFKTIDGRGANVHIANGGCITIQFVTNVIIHGLHVHDCKPTGNAMVRSSPTHYGWRTVADGDAISIFGSSHIWIDHNSLSHCADGLVDAVMGSTAITISNNHMTHHNEVMLLGHSDSYTRDKQMQVTIAYNHFGEGLIQRMPRCRHGYFHVVNNDYTHWEMYAIGGSANPTINSQGNRYNAPLNAFAKEVTKRVDTAASQWKGWNWRSEGDLLLNGA…	9	9772905	9777375	-1	Cs8g11330.1	99.8

## Sheet: Other CWRE
Gene name	Phytozome v10.2	CDS	peptide	Scaffold	Gene start	Gene end	Strand	Gene prediction	CDS	peptide	Scaffold	Gene start	Gene end	Strand	C. sinensis	% similarity
CitXXX.XX	INDUCED only in AZ-C
CitXXX.XX	INDUCED in both AZ-C and fruit rind
CitXXX.XX	INDUCED only in fruit rind
CitXXX.XX	REPRESSED only in AZ-C
CitXXX.XX	REPRESSED in both AZ-C and fruit rind
CitXXX.XX	REPRESSED only in fruit rind
CitXXX.XX	No hybridization results
Expansins
CitEXP1	Ciclev10010279m	ATGGGTCCAGTTGTTGCCGTTGTTCCTCCTCGATTTTGGCACTTTTTCTTGATTTTGAGTATGGGTTTTGTGGGCATCAATGGCCAGGTTAACCGCTGGCTTAATGCTCATGCTACTTACTATGGTGCTGATCAAAGCCCCTCCACTCTTGGAGGAGCTTGTGGGTATGATAACACAATCCACGCTGGATTCGGAGTGAACACAGCCGCCGTGAGTGGTGTTCTTTTCCGGGGCGGCCAAGCCTGCGGCGCTTGCTACCAGTTGATGTGTGACTACAGGGCCGACCCCAAGTGGTGTTTGCGCCACGCCACGGTCACCTTGACAGCCACCAACTTCTGCCCTCCGAATAACCACGGGGGTTGGTGTGACCCTCCCCGCCAACATTTTGACATGTCCATG…	MGPVVAVVPPRFWHFFLILSMGFVGINGQVNRWLNAHATYYGADQSPSTLGGACGYDNTIHAGFGVNTAAVSGVLFRGGQACGACYQLMCDYRADPKWCLRHATVTLTATNFCPPNNHGGWCDPPRQHFDMSMPAFFRIARQGNEGIVPILYKRVACKRRGGVHFTLKGQSNFNMVMFSNVGGSGDLKGAWVRGSRTKTWIAMQRNWGANWSSSVDLRIQRLSFKLTLVDGRTQLFFNVVPSSWSFGQTFSSRNQFY*	1	17893358	17894719	1								Cs1g07100.1	100
CitEXP2	Ciclev10017738m	ATGGCAATTCTTGGCTATATCATAATAGCCCTTTTCACAGTTTTTAAAGCAGCTGTTGGAAAAGGAGCCGGGTGGACTAATGCTCATGCTACCTTCTATGGAGGTGGTGATGCTTCTGGCACAATGGGTGGGGCTTGTGGGTATGGGAATCTTTACAGCCAAGGTTATGGAACAAACACAGCTGCGGTGAGCACAGCTTTATTCAACAATGGGTTGAATTGTGGAGCTTGTTATGCTATTAAATGTGTAAATGACAATAGATGGTGCTTACCAGGCTCCATTATAGTCACTGCCACTAATTTCTGTCCGCCAAATTTTGCTCTCTCTAATACCAATGGAGGTTGGTGTAATCCTCCCCTTCATCACTTTGATCTCTCTCAGCCTGTATTCCTCAAAATC…	MAILGYIIIALFTVFKAAVGKGAGWTNAHATFYGGGDASGTMGGACGYGNLYSQGYGTNTAAVSTALFNNGLNCGACYAIKCVNDNRWCLPGSIIVTATNFCPPNFALSNTNGGWCNPPLHHFDLSQPVFLKIAQYKAGIVPVQYRRVACKKSGGIRFTINGHSYFNLVLITNVGGAGDVVAVSIKGSKTGWQALSRNWGQNWQSNSYLNGQALSFKVTTSDGRTVISNNVAPANWNFGQTYTGRQF*	2	115380	116326	1								Cs9g03460.1	100
CitEXP3	Ciclev10016270m	ATGCAGTGCCAGCCGGAGTACAGCGTCAGCCAAGTCTTGACCTTTTGTCTTCTGTTGGCGTTCAAGTGTTCAGTTGTTGCTCCAACGCAGCTAAATCACCAACTGTCGGAACCACATTGGCTTCCAGCTACCGCCACTTGGTACGGCAGCCCCGACGGCGACGGCAGCGACGGAGGGGCTTGTGGGTACGGTTCATTAGTGGACGTGAAGCCACTTAGGGCGCGAGTGGGTGCAGTGAGCCCGGTGCTGTTCAAGAACGGAGGGGGATGTGGAGCATGCTACAAAGTTAGGTGCCTTGACAAGAGCATTTGCTCAAGGCGGGCCGTCACAATCATTGTAACGGACGAGTGCCCCGGTGGCTACTGCTCCAACGGTCGCACCCACTTTGACCTCAGTGGT…	MQCQPEYSVSQVLTFCLLLAFKCSVVAPTQLNHQLSEPHWLPATATWYGSPDGDGSDGGACGYGSLVDVKPLRARVGAVSPVLFKNGGGCGACYKVRCLDKSICSRRAVTIIVTDECPGGYCSNGRTHFDLSGAAFGRMAIAGESGQLRNRGELPVIYRRAPCKYPGKNIAFHVNEGSTDYWLSLLVEFEDGDGDVGSMHIREASSSEWLQMNHVWGANWCIIGGPLKGPFSVKLTTLSTGRTLSARAVIPSNWSPKATYTSRLNFSP*	2	18181400	18183878	1	aCL3482Contig1							orange1.1t00855.2	100
CitEXP4	Ciclev10024449m	CTGCTTTTGCCTGCATATTGTTACTCTCAGTTCACATTCACAAGTTCTAGAGCTTCATTCTATGGTAGCCCTGACGGCTTGGGGACACCATCTGGTGCTTGCGGGTTTGGTACATATGGAAAAACTGTAAATGATGCTAACGTGGCCGGTGTGTCGAGCCTTTGGAATAATGGAACTGCTTGTGGAACTTGCTATCAGGTCAGATGCAATGTACCCGACGTTTGCACAGATTATGGGGTGTTCGTGGTGGTGACCGACTATGGTGAAGGAGACGACACAGACTTCGTCCTCAGCCCACGCGCATATGGAAGAATGGCACTTGCAGATAAGTCAGAAGAGCTTTATACTTTTGGTGTCGTCGACGTTGAATTCCTGAGGGTCCCTTGCCGGTTCAGAGGC…	LLLPAYCYSQFTFTSSRASFYGSPDGLGTPSGACGFGTYGKTVNDANVAGVSSLWNNGTACGTCYQVRCNVPDVCTDYGVFVVVTDYGEGDDTDFVLSPRAYGRMALADKSEELYTFGVVDVEFLRVPCRFRGYNVMFKVHENSKYPQYLAVATLYVGGQNDVLAVEMWQEDCKEWMPMKRAFGAVFDIFYPPPGPMNLRFQVSGSAGLTWVVANNAIPKIWKAGVAYESAIQLA*	3	4849943	4851220	1	aC18019D04Rv_c|FGENESH	ATGGGGTTATCTCAATACTACCTTCTTTCCGTAGTGCTGCTTTTGCCTGCATATTGTTACTCTCAGTTCACATTCACAAGTTCTAGAGCTTCATTCTATGGTAGCCCTGACGGCTTGGGGACACCATCTGGTGCTTGCGGGTTTGGTACATATGGAAAAACTGTAAATGATGCTAACGTGGCCGGTGTGTCGAGCCTTTGGAATAATGGAACTGCTTGTGGAACTTGCTATCAGGTCAGATGCAATGTACCCGACGTTTGCACAGATTATGGGGTGTTCGTGGTGGTGACCGACTATGGTGAAGGAGACGACACAGACTTCGTCCTCAGCCCACGCGCATATGGAAGAATGGCACTTGCAGATAAGTCAGAAGAGCTTTATACTTTTGGTGTCGTCGAC…	MGLSQYYLLSVVLLLPAYCYSQFTFTSSRASFYGSPDGLGTPSGACGFGTYGKTVNDANVAGVSSLWNNGTACGTCYQVRCNVPDVCTDYGVFVVVTDYGEGDDTDFVLSPRAYGRMALADKSEELYTFGVVDVEFLRVPCRFRGYNVMFKVHENSKYPQYLAVATLYVGGQNDVLAVEMWQEDCKEWMPMKRAFGAVFDIFYPPPGPMNLRFQVSGSAGLTWVVANNAIPKIWKAGVAYESAIQLA*	3	4849907	4851220	1	Cs5g07854.1	98
CitEXP5	Ciclev10024410m	ATGGGGTTATGTCAATACTACCTTCTTTCCGCCGTGCTGCTTTTGCCTGCATTGTGTTACTCTCAGTTCACATTCACAAGTTCTAGAGCTACATTCTATGGTAGCGCCGATGGCTTGGGGACACCAGCTGGTGCTTGCGGGTTTGGTGAATATGGAAAAACTGTAAATGATGCTAACGTGGCCGGTGTGTCGAGCCTTTGGACTAATGGAACTGCTTGTGGAGCTTGCTATCAGGTCAGATGCAATGTACCAGAAGTTTGCACAGATTATGGGGTGTACGTGGTGGTGACTGACTATGGTGAAGAATACGACACAGAATTCATCCTCAGCCCACGCGCATATGGAAGAATGGCACTTACAGATAAGTCAGAAGAGCTTTATACTTTTGGTGTCATCGAT…	MGLCQYYLLSAVLLLPALCYSQFTFTSSRATFYGSADGLGTPAGACGFGEYGKTVNDANVAGVSSLWTNGTACGACYQVRCNVPEVCTDYGVYVVVTDYGEEYDTEFILSPRAYGRMALTDKSEELYTFGVIDVEFLRVPCRFRGYNVMFKVHENSKYPQYLAVSMLYVGGQNDVLAVEIWQEDCKEWMAMRRAFGAVFDIFNPPPGAINLRMQVSGSAGLRWVVANNAIPKVWKAGVAYGSAIQLA*	3	4860248	4861481	1								Cs5g07854.1	93.9
CitEXP6	Ciclev10021884m	ATGGGGTTATGTCAATACTACCTTCTTTCCGTCGTGATGCTTTTGCCTGCATTGTGTTACTCTCAGTACACATTCACAAGTTCTAGAGCTACATACTATGGTAGCCCTGACGGCTTGGGGACACCAACTGGTGCTTGCGGGTTTGGTGGATATGGAAGAACTGTAAATGATGCTAACGTGGCCGGTGTGTCGAGGCTTTGGAATAATGGAACTGGTTGTGGAACTTGCTATCAGGTCAGATGCACTGTACCAGAAGTTTGCACAGATTATGGGGTGTCCGTGGTGGTGACTGACTATGGTGAAGGAGACGACACAGACTTCATCCTCAGCCCACGCGCATATGGAAGAATGGCAATTACAGATAAGTCAGAAAAGCTTTATTCTTATGGTGTCGTCGAC…	MGLCQYYLLSVVMLLPALCYSQYTFTSSRATYYGSPDGLGTPTGACGFGGYGRTVNDANVAGVSRLWNNGTGCGTCYQVRCTVPEVCTDYGVSVVVTDYGEGDDTDFILSPRAYGRMAITDKSEKLYSYGVVDVEFERVSCRFRGYNVMFKVHENSRYPQYLAVSMLYVGGQNDVLAVEIWRKDRHEWVAMRRAFGAVFDIPNPPPGAINLRFQVSGSAGLTWVVANNAIPKIWKAGVAYESAIQLE*	3	4867451	4869045	1	aCL4642Contig1							Cs5g07856.1	93.1
CitEXP7	Ciclev10024605m	ATGGCTTCTTTTTTTCGATCATTCGGATTTAACTTCATATTAGTTGTTTTGATTTTGGCAATCGCCGGGAAGTCAAACGCTTTGGGTTATACACATCCTATTTTCCGGCCAGGTCCATGGAGGCTTGCTCACGCCACCTTTTATGGCGATGAGTCTGCTTCCGAAACCATGGGAGGAGCTTGTGGGTATGGAAACTTGTTTTCTAATGGTTACGGAACAGACACAGCGGCTTTGAGCTCCACATTGTTCAACAATGGATACGCTTGTGGGACTTGTTACCAGATAAAGTGCTATAATTCGCCTCATTGCTATAAATATGTACCATTCACCACAGTTACAGCCACAAACCTCTGCCCGCCAAATTGGTCCCAGGACTCCAATAATGGAGGCTGGTGCAAT…	MASFFRSFGFNFILVVLILAIAGKSNALGYTHPIFRPGPWRLAHATFYGDESASETMGGACGYGNLFSNGYGTDTAALSSTLFNNGYACGTCYQIKCYNSPHCYKYVPFTTVTATNLCPPNWSQDSNNGGWCNPPRAHFDMSKPAFMKIGAWKAGIVPVLFRRVPCIKPGGIRFAFQGNGYWLLVYVMNVAGGGDIASMWVKGTRTGWISMSHNWGASYQAFATLGGQALSFKIQSYSTKETIIAYNVAPANWNVGLTYKSNVNFH*	3	6588465	6589807	1								Cs5g10000.1	99.6
CitEXP8	Ciclev10023864m	ATGGCTTCTTTCCTTCGATCATTTGGATTCAGCTGCCTATTGGTTGTTTTGATTTTGGCAATCGCTGAAAAGTCAAATGCTTCGGGTTATACACGTCCTATTTTCCGGTCAGGTGCATGGCAGCTTGCTCACGCCACCTTTTACGGTGATGAGTCTGCCTCTGAGACCATGGGTGGAGCTTGCGGGTATGGAAACTTGCGGATTAATGGATACGGGACAGACACAGCGGCATTGAGCTCTACGTTGTTCAACGATGGATACGCTTGTGGGACTTGTTATCAGATAAAGTGCCATGATTCGCCTCATTGCTATACATATGTATCGTTCACAACAGTTACAGCCACAAACCTTTGCCCGCCAAATTGGTCCCAGGACTCCAATAATGGTGGCTGGTGCAAT…	MASFLRSFGFSCLLVVLILAIAEKSNASGYTRPIFRSGAWQLAHATFYGDESASETMGGACGYGNLRINGYGTDTAALSSTLFNDGYACGTCYQIKCHDSPHCYTYVSFTTVTATNLCPPNWSQDSNNGGWCNPPRAHFDMSKPAFMKIADWKAGIIPVIYRSSDVYFLEGTVNRFIIFEIYPLVVTCVLSLFA*	3	6590767	6592330	1	FGENESH|C. sinensis	ATGGCTTCTTTCCTTCGATCATTTGGATTCAGCTGCCTATTGGTTGTTTTGATTTTGGCAATCGCTGAAAAGTCAAATGCTTCGGGTTATACACGTCCTATTTTCCGGTCAGGTGCATGGCAGCTTGCTCACGCCACCTTTTACGGTGATGAGTCTGCCTCTGAGACCATGGGTGGAGCTTGCGGGTATGGAAACTTGCGGATTAATGGATACGGGACAGACACAGCGGCATTGAGCTCTACGTTGTTCAACGATGGATACGCTTGTGGGACTTGTTATCAGATAAAGTGCCATGATTCGCCTCATTGCTATACATATGTATCGTTCACAACAGTTACAGCCACAAACCTTTGCCCGCCAAATTGGTCCCAGGACTCCAATAATGGTGGCTGGTGCAAT…	MASFLRSFGFSCLLVVLILAIAEKSNASGYTRPIFRSGAWQLAHATFYGDESASETMGGACGYGNLRINGYGTDTAALSSTLFNDGYACGTCYQIKCHDSPHCYTYVSFTTVTATNLCPPNWSQDSNNGGWCNPPRAHFDMSKPAFMKIADWKAGIIPVIYRRVPCVKAGGLRFAFQGNGYWLLVYVMNVAGGGDIANMWVKGTRTGWISMSHNWGASYQAFATLGGQALSFKLTSYSSKETIFAYNVAPPNWNVGLTYSSDVNFH*	3	6590767	6592175	1	Cs5g10010.1	98.9
CitEXP9	Ciclev10021897m	ATGGCATTTCTTGGGCTGCTGTTGTTGGGGATTCTTTCTTTAGTCTCATCTGTTTATGGCCAGGGATGGACTGATGCTCATGCCACTTTTTATGGTGGGGGTGATGCCTCTGGTACAATGGGTGGCGCTTGTGGGTATGGAAACTTATACAGCGAGGGATATGGGACAAACACAGCAGCTCTGAGCACTGCGCTTTTCAACAATGGCATGAGCTGTGGGGCTTGTTTTGAGATCAAGTGTGTTAATGACCCAAGATGGTGCCGTCCGGGCTCCATTTTTGTTACTGCCACAAATTTTTGCCCTCCAAATAATGCTCTCCCAAACAATGCCGGTGGCTGGTGCAATCCTCCCCAGCAACATTTTGACCTCTCTCAGCCTGTGTTTGAACAAATTGCTCAG…	MAFLGLLLLGILSLVSSVYGQGWTDAHATFYGGGDASGTMGGACGYGNLYSEGYGTNTAALSTALFNNGMSCGACFEIKCVNDPRWCRPGSIFVTATNFCPPNNALPNNAGGWCNPPQQHFDLSQPVFEQIAQYKAGIVPVSYRRVPCSRKGGIRFTINGHSYFNLVLITNVGGAGDVRAVSIKGSRTDWQPMSRNWGQNWQSNSYLNGQSLSFKVTTSDGHTVVSNNVAPAGWSFGQTFSGLQVP*	3	7337405	7339222	-1	aCL2452Contig1							Cs5g10820.1	86.9
CitEXP10	Ciclev10021887m	ATGGACTTTCTTGGGATCTTTCTAGTGGCCTCTTTGTCAATGTTGAGAACAATTCATGGCTATGCCGGTGGATGGTCAAGTGCTCATGCTACGTTCTATGGCGGAGGCGATGCTTCTGGCACAATGGGAGGAGCTTGTGGCTATGGAAATCTTTACAGCCAAGGTTATGGCACAAGCACTGCCGCATTGAGCACTGCCCTATTCAACAACGGGGTGACTTGTGGAGCTTGCTTTGAGATCAAATGTGTAAATGACAATAGGTGGTGTCTTCCAGGATCTATCATTGTCACAGCAACAAACTTCTGCCCCCCAAACCATGCCCTTCCGAATAATGCAGGAGGCTGGTGTAACCCTCCTTTGCAGCATTTTGATCTTTCTCAGCCTATTTTCCAACACATA…	MDFLGIFLVASLSMLRTIHGYAGGWSSAHATFYGGGDASGTMGGACGYGNLYSQGYGTSTAALSTALFNNGVTCGACFEIKCVNDNRWCLPGSIIVTATNFCPPNHALPNNAGGWCNPPLQHFDLSQPIFQHIAHYKAGIVPVQYRRIACSKRGGIRFTINGHSYFNLVLITNVGGAGDVVSVSIKGSRTGWQPMSRNWGQNWQSNSYLNGQALSFKVTTSDGRSVISINVAPPNWSFGRTYNGRQF*	3	41095306	41096701	1								Cs5g26290.1	100
CitEXP11	Ciclev10023630m	ATGGAAGGTTTCTTTGCTTTCAGTTTTGTGGCGCTGATCTTAACGTTACTTTCCATTAAAATTAATGCAGCTTCTGCTGCTTGGATGCAAGCCCATGCAACTTTCTACGGTGGAAGTGATGCTTCAGAAACAATGGGTGGTGCTTGTGGATATGGAAACTTATACACAGATGGTTATGGCACAAAAACTGCAGCATTGAGCACAGTTTTGTTCAATAATGGAAAGTCTTGTGGTGGGTGCTATCACATCGTTTGCGACGGGAGGAAGGTGCCGCAATGGTGCCGCCGGGGGACATCCATCATCATTACGGCTACAAACTTCTGCCCGCCAAACTATGATCTGCCTAACGACAACGGCGGTTGGTGCAACCCTCCACGGGCGCACTTTGACATGTCTCAG…	MEGFFAFSFVALILTLLSIKINAASAAWMQAHATFYGGSDASETMGGACGYGNLYTDGYGTKTAALSTVLFNNGKSCGGCYHIVCDGRKVPQWCRRGTSIIITATNFCPPNYDLPNDNGGWCNPPRAHFDMSQPAFESIAIYRAGIVPVLYRKVGCMRSGGLRFTINGRDYFELVLVSNVGGAGEVSNVWIKGSKMSKWQVMSRNWGANWQSLTYLNAQSLSFRVQTSNGRTRTAYNVAPSNWRFGQSFKSNVQF*	3	47243416	47244382	-1								orange1.1t00615.1	100
CitEXP12	Ciclev10021623m	ATGGCACATGTTTTTCGATATCCCATATCATTTTTCACTCTTGTATTCATGTTTCCTCTTTTCCTGCACTCATGTTGGTGCTTCAATCCCAAGCTACTTAATATCACCATGGCAGAGTCGGGGTCTGATTGGTCCCCGGCTGGGGCAACGTGGTACGGTAGCCCTACTGGTGCAGGAAGCGATGGTGGCGCTTGTGGGTACGGAGCGGCAGTGGAGCAAGCCCCGTTCTCCGCACTGATTTCTGCTGGAGGCCCCTCTTTGTACAAATCTGGCAAAGGATGTGGAGCCTGTTATCAGGTAAAATGTACACATCCGGAATGCTCGGGAAATCCAGTGACAGTGGTCATTACTGATGAATGCCCTGGGGGGCCCTGTGTTTCAGAATCAGTTCATTTCGAC…	MAHVFRYPISFFTLVFMFPLFLHSCWCFNPKLLNITMAESGSDWSPAGATWYGSPTGAGSDGGACGYGAAVEQAPFSALISAGGPSLYKSGKGCGACYQVKCTHPECSGNPVTVVITDECPGGPCVSESVHFDLSGTAFGAMAISGKADQLRNVGVLQIQHRRVECNYPGMRIAFHVDSGSNPNYFATLIEYEDGDGDLASVDLQQALDSSDSWLPMQRSWGAVWKLNYGSTLRAPFSLRLTAAESGKALVAKGVIPAGWQPGQTYRSLVNFTP*	3	50119464	50120716	-1								orange1.1t00187.1	100
CitEXP13	Ciclev10032484m	ATGGGTGTCGCTGTGGGCATCATTTGTATTGTGACTTTTGTTACATTTTCCTCCCTTAGTGTTGATGCGAGAATCCCCGGCGTTTACGGTGGCGAGGCATGGCAAAGCGCTCATGCTACATTCTATGGAGGCAATGATGCCTCAGGAACAATGGGAGGTGCTTGTGGGTACGGCAATCTCTACAGTCAAGGATACGGCGTTAACACGGCAGCGCTAAGCACAGCACTGTTCAACAACGGGTTGAGCTGCGGTGCGTGTTTTGAGATTAAGTGTGCGAATGACCCTCAATGGTGCCACGCTGGGAGCCCTTCAATCTTCGTCACTGCCACCAACTTTTGCCCTCCGAATTTCGCTCAACCCAGCGACAATGGGGGGTGGTGCAACCCTCCTCGCCCTCAC…	MGVAVGIICIVTFVTFSSLSVDARIPGVYGGEAWQSAHATFYGGNDASGTMGGACGYGNLYSQGYGVNTAALSTALFNNGLSCGACFEIKCANDPQWCHAGSPSIFVTATNFCPPNFAQPSDNGGWCNPPRPHFDLAMPMFLKMAEYRAGIVPVSYRRVPCRKRGGIRFTINGFRYFNLVLITNVAGAGDIVKASVKGSRTGWMSLSRNWGQNWQSNSVLVGQSLSFRVTGSDRRTSTSWNIVPANWQFGQTFTGKNFRV*	4	164208	166483	-1	aIC0AAA94BG02RM1_c							Cs7g32410.1	100
CitEXP14	Ciclev10032524m	ATGGCCAATATTGCAGCATCATCTAGCGTTGCTCTCCTTTTGTTTGTGCTCAATTTTTGCTTTCGTGGCACATTTGGAGACTATGGTGGTGGGTGGCAAAGTGGCCATGCAACTTTCTATGGCGGGGGTGATGCTTCCGGCACAATGGGTGGTGCTTGTGGGTATGGCAATTTGTACAGCCAAGGCTATGGGACTAACACTGCAGCACTTAGTACCGCTCTATTCAACAATGGCCTAAGCTGTGGTTCATGCTATGAAATGAAATGTGAAAATGACCCCAAGTGGTGCCTCCCCGGCTCCATCATTGTCACCGCCACCAACTTCTGCCCACCTAACCTTGCCCTGTCTAACGACAACGGCGGTTGGTGCAATCCTCCCCTCCAGCACTTTGACATGGCT…	MANIAASSSVALLLFVLNFCFRGTFGDYGGGWQSGHATFYGGGDASGTMGGACGYGNLYSQGYGTNTAALSTALFNNGLSCGSCYEMKCENDPKWCLPGSIIVTATNFCPPNLALSNDNGGWCNPPLQHFDMAEPAFLQIAQYRAGIVPISFRRIPCAKKGGIRFTVNGHSYFNLVLVTNVGGAGDVHSVSIKGSKTGWQAMSRNWGQNWQSNSYLNGQSLSFQVTASDGRTVTSNNVVPANWQFGQTFEGGQF*	4	2153718	2155194	-1	aCL2131Contig1							Cs7g29830.1	49.5
CitEXP15	Ciclev10032508m	ATGGCTCTTTCTCTCAAATCCTTAATGCTCCTTTTAGCAACTCTATGTATTATGCAAGCTCTGGCAGCCGAGGCTGAAACATGTCCCGACTGTTTCATTCGATCTCGAGCAGCTCACTACCCAAATTCCGATGAACAAGGAACTGATTCTGGTGCTTGTGGGTTTGGTTCGTTTGGAGCAACAATCAACGGTGGAGATGTATCGGCCGCATCTGGTCTCTATCGTAATGGTCTTGGCTGTGGCGCTTGCTACCAGGTTAGGTGTTTGAACAGCTACTATTGCTCAGACAGAGGAGCAACGGTAGTGATTACGGATTCAGGCTGGGGTCCCAATACCGACTTTATTTTGAGCAGGCGAGCCTTCGGCCGAATGGCTCAAACCACCGACGCGGCAGCAGCT…	MALSLKSLMLLLATLCIMQALAAEAETCPDCFIRSRAAHYPNSDEQGTDSGACGFGSFGATINGGDVSAASGLYRNGLGCGACYQVRCLNSYYCSDRGATVVITDSGWGPNTDFILSRRAFGRMAQTTDAAAALLAHGVVDVEYRRVSCSYPYKNITIKIDEKSDYPHYLGFVIWYQQGKKDITAVQLCETKNFACKLLDRSHGAVWTTTSPPSGPLSLRMFFSDEDGDDESWVVPVNNIPQDWKAGETYDTGVQVN*	4	11827037	11828869	-1	aKN0AAQ1YG09RM1_c							Cs7g22280.1	100
CitEXP16	Ciclev10033831m	ATGCCTAGACGAGAGGGATCTAGTGTTGTTGACTTGGCCCATAATGAGGTTCATGCTCTGCCAAACACTGTAACAATGCAAGATGGGCTGGCTCATTGCATTGAAAAGAAAGCACACAACCAACAAAGTGTTGGCTCCACTGGCAATGGAGTCCCCTTAAGTGGCTTGACTGGGTTTGCTCCCCAGTTCGAGTCGCAGGGAAGTCGCCTTTGTTGGGAGAACCTGTGCCTCCCGGTTCGAGCGGGGACTTCTAGTCTGGGTTGTGACGGAGCTTGTGGCTACGGAGACCTATTTAAACAAGGGTATGGCCTCGAGACAACAGCTTTAAGCACAGCTCTTTTCAACAACGGCCGAACTTGCGGCGCCTGTTATCAAATCGTGTGCTATAACTCCAAATGG…	MPRREGSSVVDLAHNEVHALPNTVTMQDGLAHCIEKKAHNQQSVGSTGNGVPLSGLTGFAPQFESQGSRLCWENLCLPVRAGTSSLGCDGACGYGDLFKQGYGLETTALSTALFNNGRTCGACYQIVCYNSKWCLKGAGAIGVTATNFCPPNYSKPHENWCNPPLKHFDLSQPMFRKIAEYKGGIVPVLYRRVSCVKSGGVMFEMHGNPYWILVLVYNVGGAGEVIDVKIKGSSTGWIQMSRNWGQNWQTSAQLLGQSLSFQVTTSDGKMVQFDDVAPPHWQFGDVFEGKQNF*	4	20882554	20885304	-1	FGENESH|C. sinensis	ATGGCCGGCCGTGAGGGGCCTATTCTTTTATTAATGGCTATGGCGCTGAACCTCTTTAGCTCAGCTTCAACGTTAACTGAGTGGAGTCCCGCACATGCAACGTTTTACGGTGACATGGCTGGCAATGAAACAATGTACGGAGCTTGTGGCTACGGAGACCTATTTAAACAAGGGTATGGCCTCGAGACAACAGCTTTAAGCACAGCTCTTTTCAACAACGGCCGAACTTGCGGCGCCTGTTATCAAATCGTGTGCTATAACTCCAAATGGTGCCTGAAGGGGGCGGGTGCTATTGGCGTAACTGCGACAAATTTTTGCCCTCCGAATTACAGCAAACCCCATGAAAATTGGTGCAATCCTCCCCTGAAACACTTTGATTTGTCACAACCCATGTTCCGA…	MAGREGPILLLMAMALNLFSSASTLTEWSPAHATFYGDMAGNETMYGACGYGDLFKQGYGLETTALSTALFNNGRTCGACYQIVCYNSKWCLKGAGAIGVTATNFCPPNYSKPHENWCNPPLKHFDLSQPMFRKIAEYKGGIVPVLYRRVSCVKSGGVMFEMHGNPYWILVLVYNVGGAGEVIDVKIKGSSTGWIQMSRNWGQNWQTSAQLLGQSLSFQVTTSDGKMVQFDDVAPPHWQFGDVFEGKQNF*	4	20882554	20883429	-1	Cs7g11200.1	99.2
CitEXP17	Ciclev10032548m	ATGTATTTTGCTGGGTTTTTCTCGTTGGGTTTCCTTGCATTGGTGTCCTCCGTTCATGCTAATGGAGGCGGTGGGTGGATTAATGCTCGTGCCACTTTCTATGGTGGTGGCGATGCTTCAGGGACTATGGGTGGGGCTTGTGGCTATGGGAATCTGTATAGCCAGGGTTATGGAACGAACACTGCAGCCTTGAGCACGGCTTTGTTCAACAACGGTTTGAGCTGTGGGTCTTGCTATGAGATTAAGTGTGTTAATGACCCCAAATGGTGCTTGCCCGGCACCATTATGGTCACAGCTACCAATTTTTGCCCACCGAACAACGCCCTTCCCAACAATGCAGGCGGTTGGTGCAATCCTCCGCAGCAACATTTTGATCTCTCTCAGCCTGTGTTCCAACAC…	MYFAGFFSLGFLALVSSVHANGGGGWINARATFYGGGDASGTMGGACGYGNLYSQGYGTNTAALSTALFNNGLSCGSCYEIKCVNDPKWCLPGTIMVTATNFCPPNNALPNNAGGWCNPPQQHFDLSQPVFQHIAQYRAGVVPVAYRRVPCGRRGGIRFTINGHSYFNLVLITNVGGAGDVHAVSIKGSRTGWQPMSRNWGQNWQSNTYLNGQSLSFEVTTSDGRTVTSYNVAPAGWSFGRTYSGAQFR*	4	24005221	24007211	-1	aCL1430Contig1							Cs7g03630.1	100
CitEXP18	Ciclev10002142m	ATGGGCAACCCATCTCATAACTTGTTATTATTCCTCTTCCTCCTTCGTATTGCTAACAAAGATTTCCATATTTTGCAAATGGGGTTATATCAATACTACCTTCTTTCCGTCATGCTGCTTTTGCCTGCATTGTGTTACTCTCATTACACATCCACATATTCTAGAGCTACATACTATGGTAGCCCTGATAGTTTAGGGACACCAACTGGTGCTTGCGGGTTTGGTGAATATGGAAGAACTGTAAATGATGCTAACGTGGCCGGTGTGTCGAGGCTTTGGAAAAATGGAACTGGTTGTGGAGCTTGCTATCAAGTCAGGTGCAAGGTACCACAACTTTGCACAGATTATGGGGTGTACGTGGTGGTGACTGACTACGGTGAAGGAGACAAAACAGACTTC…	MGNPSHNLLLFLFLLRIANKDFHILQMGLYQYYLLSVMLLLPALCYSHYTSTYSRATYYGSPDSLGTPTGACGFGEYGRTVNDANVAGVSRLWKNGTGCGACYQVRCKVPQLCTDYGVYVVVTDYGEGDKTDFILSPRAYGRMALPDKSAELYSYGVVNVEFRRVPCWYKGYNLQFKVHENSRYPHYLAIAILYVAGQNDVLAVEIWQEDYQEWVAMRRAFGAVFDISSPPEGAISLRFQVSGSAGLTWVVANNAIPSDWKAGVAYESEIQLK*	5	1443600	1445440	1	aCL4602Contig1	ATGGGGTTATATCAATACTACCTTCTTTCCGTCATGCTGCTTTTGCCTGCATTGTGTTACTCTCATTACACATCCACATATTCTAGAGCTACATACTATGGTAGCCCTGATAGTTTAGGGACACCAACTGGTGCTTGCGGGTTTGGTGAATATGGAAGAACTGTAAATGATGCTAACGTGGCCGGTGTGTCGAGGCTTTGGAAAAATGGAACTGGTTGTGGAGCTTGCTATCAAGTCAGGTGCAAGGTACCACAACTTTGCACAGATTATGGGGTGTACGTGGTGGTGACTGACTACGGTGAAGGAGACAAAACAGACTTCATCCTCAGCCCGCGCGCATATGGAAGAATGGCACTTCCAGATAAGTCAGCAGAGCTCTATTCTTATGGTGTGGTCAAC…	MGLYQYYLLSVMLLLPALCYSHYTSTYSRATYYGSPDSLGTPTGACGFGEYGRTVNDANVAGVSRLWKNGTGCGACYQVRCKVPQLCTDYGVYVVVTDYGEGDKTDFILSPRAYGRMALPDKSAELYSYGVVNVEFRRVPCWYKGYNLQFKVHENSRYPHYLAIAILYVAGQNDVLAVEIWQEDYQEWVAMRRAFGAVFDISSPPEGAISLRFQVSGSAGLTWVVANNAIPSDWKAGVAYESEIQLK*	5	1443394	1445440	1	Cs2g26323.1	53
CitEXP19	Ciclev10002233m	ATGGCGAAAACCTTGCTTACATCTGCAATCTTGATTCAACTCTGCTGTTTAAGTGTCAGTATCAAAGCTTTTTCGCCTTCAGGCTGGACCCAAGCTCATGCCACATTCTACGGAGGCAGCGATGCCTCAGGGACAATGGGGGGAGCCTGCGGGTATGGCAACTTGTATTCAACTGGGTATGGAATAAGCACAGCAGCATTGAGCACCGCATTGTTCAACGATGGAGCTTCATGTGGGCAATGCTACCGGATCATGTGTGACTATAAATCTGATACTAGATGGTGCATAAAAGGTACATCTGTAACCATTACCGCTACAAACTTTTGCCCTCCTAACTTCGCTCTTCCAAGCGACAATGGTGGCTGGTGCAATCCTCCTCGCCAGCATTTTGACATGGCT…	MAKTLLTSAILIQLCCLSVSIKAFSPSGWTQAHATFYGGSDASGTMGGACGYGNLYSTGYGISTAALSTALFNDGASCGQCYRIMCDYKSDTRWCIKGTSVTITATNFCPPNFALPSDNGGWCNPPRQHFDMAYPAWQKIGIYRGGIVPVLYQRVPCKKPGGVRFTINGRDYFELVLISNVAGAGSIKSAYIKGSSTNWMAMSRNWGANWQSNAYLNGQSLSFKVTTTDGETRIFPNVVPSNWHFGQSFASSIQF*	5	42243513	42244971	-1	aC02006G07SK_c							Cs3g26610.1	100
CitEXP20	Ciclev10011981m	ATGGCGTCGCCTTTGAAAGCATTGTCATCAGCAGCTGTGTTGATGCTGCTTTTAGCTGCTGCTACATTGCCCAATTTTGGTGAAAGTCACCAACAACAAAATGGGGGAAAACATCGCGGACGTCGTCATCATCACAGACACAACAAGCCTTGGGTTCCTCATCACAAGGGACATCAACATAAAAGGAAGCCAGTGCATGAACAGCCACAGCCAGTACAGCCACAACCACACCCAGCACAGCCGGTAGAGCCGGTACAGCAACAGCCGCAGCCAGTACAGCCACAGCCAGTGCAGTCGCAGCCACAGCTACAGCCGCAGCCAGTCCAGCCGATGCCTGTGGAGCACCTTCCCCCGGTACTACCTGGAGTGCCTATTGCAAAACCAACACATCCAGAACTT…	MASPLKALSSAAVLMLLLAAATLPNFGESHQQQNGGKHRGRRHHHRHNKPWVPHHKGHQHKRKPVHEQPQPVQPQPHPAQPVEPVQQQPQPVQPQPVQSQPQLQPQPVQPMPVEHLPPVLPGVPIAKPTHPELSSADREAHEHDFKPGPWKHAHATFYTGDTGSFGGACGYSDVTREGYGEGTTALSTTLFHNGAACGACFEIKCIDDPKSCIPGQPSLFVTATNFCPPNFHQDANDGGWCNPPREHFDIAYPAFKHIAEYKAGIVPVAYRRVSCKKQGGIKFTITGTQHWTLVTIWNVGGAGDISHVEVKGDNKLNWTPLHKNWGSKWQTSCSLEEESLTFKVTTSDGRFVISPNVTPNKYWKYGQTFEGLNFR*	6	5407450	5408659	-1	aIC0AAA62AH02RM1_c							orange1.1t03018.1	100
CitEXP21	Ciclev10012518m	ATGGCTCTTTTCAGAATGCTCTGCTTTTTCTCACTGGCACTCTCCTTATTTGCGACGGCCAACGCCAAGATTCCCGGTGTCTTCGCCGGTGGCCCCTGGCAATCGGCCCACGCCACTTTTTACGGTGGCAGCGACGCTTCCGGCACTATGGGTGGTGCTTGTGGGTACGGGAATCTGTACAGCCAGGGCTATGGAGTGAACACGGCGGCTCTCAGTACGGCGCTGTTCAACAACGGCTTGAGCTGCGGCGCGTGCTTCGAGTTAAAGTGCGGCGGCGACCCGCAATGGTGTAACCCGGGTAACCCGGCCATTCTGATCACGGCGACAAACTTTTGCCCCCCGAACTTCGCTCAGCCCTCCGATAATGGCGGGTGGTGCAACCCTCCTCGCCCTCATTTC…	MALFRMLCFFSLALSLFATANAKIPGVFAGGPWQSAHATFYGGSDASGTMGGACGYGNLYSQGYGVNTAALSTALFNNGLSCGACFELKCGGDPQWCNPGNPAILITATNFCPPNFAQPSDNGGWCNPPRPHFDLAMPMFLKLAQYRAGIVPVSYRRVPCRKRGGIRFTINGFRYFNLVLVTNVAGAGDIVRVSVKGANTQWLSMSRNWGQNWQSNAQLVGQALSFRVTGSDRRTSTSWNVAPANWQFGQTFSGKNFRV*	6	14194454	14196761	-1	aCL356Contig1							Cs6g06530.1	100
CitEXP22	Ciclev10013804m	ATGGCCACTAAAGCTAATGCCATGAAAAACTTTCTATTTCTTGTTTTGTTCTTTTTCATCAGCATTTTTGTTCACGCTATAAATGGGGACTACGGTGGCTGGCAAATTGCACATGCCACATTTTATGGTGGCAGTGATGCCTCTGGCACAATGGGGGGAGCTTGTGGGTATGGAAACTTGTACAGCCAGGGTTATGGCACAAACACAGCAGCTCTAAGCACGGCTCTGTTCAACAATGGCTTGAGCTGCGGTGCATGCTATGAGATACGTTGCGCCAATGATCCACAATGGTGCCTCCCTGGCACCATCACTGTGACTGCCACCAACTTTTGCCCTCCTAATTATGCTTTGTCTAATGACAATGGCGGCTGGTGCAATCCCCCTCTTCAACATTTTGAT…	MATKANAMKNFLFLVLFFFISIFVHAINGDYGGWQIAHATFYGGSDASGTMGGACGYGNLYSQGYGTNTAALSTALFNNGLSCGACYEIRCANDPQWCLPGTITVTATNFCPPNYALSNDNGGWCNPPLQHFDLAQPSFLHIAQYRAGIVPVLFRRAPCVKKGGIRFTINGHSYFNLVLITNVGGAGDVKAVFIKGSKTGWQAMSRNWGQNWQSNSYLDGQSLSFKVTTSDGRTITSYNVVPANWKFGQTFEGSQL*	6	17532972	17534087	-1								Cs6g09930.1	100
CitEXP23	Ciclev10012472m	ATGTCGCCACAACTGTTAACTCTTGTAATACAACTGCTGCTTCTGTTCACACCAGCACCGACAACAGTCACCTCACACTACAACTACAACTTCACTTCCACGTCTCCCCCATCGCAATCCGAGTGGCGGCCGGCACGCGCCACTTTCTACGCGGCCTCCGATCCCCGTGACAAGGTGGGCGGCGCGTGCGGGTACGGCGACCTCGAAAAGGCAGGCTACGGTCAGGCCACCGCTGGACTGTCTGAGATTCTCTTCGAGCGCGGCCAGATCTGCGGCGCCTGCTTTGAGCTCCGCTGTGTCGAGGATATCCGATGGTGCATTCCTGGAACCTCTATAATTGTCACTGTCACTAACTTTTGTGCTCCTAATTACGGTTTTAACCCCGATGGCGGTGGCCAC…	MSPQLLTLVIQLLLLFTPAPTTVTSHYNYNFTSTSPPSQSEWRPARATFYAASDPRDKVGGACGYGDLEKAGYGQATAGLSEILFERGQICGACFELRCVEDIRWCIPGTSIIVTVTNFCAPNYGFNPDGGGHCNPPNKHFVLPIEAFEKIAIWKAGNMPVQYRRIKCRKEGGIRFTIDGSDIFISALISNVAGAGDVVAVKIKGSRTGWLPMGRNWGQNWHINANLKNQPLSFEVTTSDGLTVTSYNVAPKNWNFGQTFEGKQFES*	6	21446971	21449098	-1								Cs6g15990.1	100
CitEXP24	Ciclev10012611m	ATGGCTCTTTGGGTGATTCTTTGTGTTGGGTTTCTCTCATTGGTCTCATCCGTTCAAGGTTATGGAGGTTGGATTAATGCTCATGCAACTTTCTATGGAGGTGGTGATGCTTCTGGCACAATGGGGGGCGCTTGTGGGTACGGCAATTTGTACAGCCAAGGTTATGGTACTAATACCGCAGCACTTAGCACTGCTTTGTTCAACAATGGCCTAAGTTGTGGAGCTTGCTTTCAAATTATGTGCGCTAATGACCCGCAATGGTGCCTGCGTGGCTCCATCATTGTCACTGCCACTAACTTTTGCCCTCCTGGAGGCTGGTGTGATCCTCCTAACCACCACTTTGATCTCTCTCAGCCTGTCTTCCAACACATTGCCCAGTATAGAGCTGGTATTGTTCCT…	MALWVILCVGFLSLVSSVQGYGGWINAHATFYGGGDASGTMGGACGYGNLYSQGYGTNTAALSTALFNNGLSCGACFQIMCANDPQWCLRGSIIVTATNFCPPGGWCDPPNHHFDLSQPVFQHIAQYRAGIVPVIYRRVRCKRNGGIRFTINGHSYFNLVLITNVGGAGDVHAVSIKGSRTRWQPMSRNWGQNWQSNSYLNGQSLSFVVTTSNGHSVVSYNVAPPNWSFGQTYTGRQFRY*	6	25033676	25035365	-1	aKN0AAI1BD07FM2_c							Cs6g21460.1	99.2
CitEXP25	Ciclev10013813m	ATGGCAACAACCGGTAATTTCTTTGCATGGTTCAGTTTCATGGCTGCTCTTGCAATGGCTGTGGCTTCAAGATTGCCCTACGATGAAGTTAAAATGAATGGTGCGTGGGAAGATGCTCATGCTACATTTTATGGTGACATGTCTGGAGGAGAAACCATGCAGGGAGCTTGTGGTTATGGTGATCTCAAGAGACAAGGATATGGCCTTGAGACAGCAGCTCTAAGCACAGCACTCTTCAACAATGGCTCAACTTGCGGTGCTTGTTTCGAAATCATTTGTGTGAATGATCCTCAATGGTGCTTAAAAGGTGCCGGCTCAATCAAAATCACAGCAACCAATTTCTGCCCACCAAACTACACAAAGTCAAAGGACATATGGTGCAATCCGCCCCAGAAACAC…	MATTGNFFAWFSFMAALAMAVASRLPYDEVKMNGAWEDAHATFYGDMSGGETMQGACGYGDLKRQGYGLETAALSTALFNNGSTCGACFEIICVNDPQWCLKGAGSIKITATNFCPPNYTKSKDIWCNPPQKHFDLSMPMFVKLAPSKAGIIPVRYRRILCSKQGGVKFEVKGNPNWTLVLVYNVGGAGDVTAVQVKGSSTGWLPMSRNWGQNWQTGTVLLGQGLSFQVTTSDGKTLLFDNVAPRNWQFGQTFQGRRNF*	6	25387682	25388780	1								Cs6g22110.1	97.7
CitEXP26	Ciclev10029135m	ATGGGAGCTCCTCAAGCCATTGTTTTCTTCTTGATTTTACTTCAAACATGCAAGACTGCAGCACAGCATGAAGAATGGAACTCTGCTACGGCTACATACACCAAAGAAACAAATGGGTCTATCATCATTGAAGGTGCTTGTGGTTATGGGGACCTTCACAGGGCCACCTACGGAAAATACAGTGCTGGGCTTAGTACAATGTTATTCAACAGAGGGAGTACTTGTGGAGCTTGCTTTGAGCTCAGATGTGTCGACCACATCTTGTGGTGCCGGCCTGGTAGCCCATCTGTCATACTCACCGCCACAGATTTCTGCCCTCCCAATTACGGGCTTTCGTCGGATTATGGTGGCTGGTGTAACTTTCCCAAAGAACACTTTGAGATGTCAGAGGCCGCATTC…	MGAPQAIVFFLILLQTCKTAAQHEEWNSATATYTKETNGSIIIEGACGYGDLHRATYGKYSAGLSTMLFNRGSTCGACFELRCVDHILWCRPGSPSVILTATDFCPPNYGLSSDYGGWCNFPKEHFEMSEAAFVEIAERRADIVPVQYRRVKCERRGGLRFTVSGSSHFYQVLVTNVGLDGEVIAVKVKGSKTGWIPMARNWGQNWQSNVNLTGQPLSFEVTTSNRKTLTSYNVAPANWQFGQTYEGKQF*	8	177831	178744	1								Cs8g01340.1	100
CitEXP27	Ciclev10029088m	ATGGTTTTGTTTCTTTGCTTTCTCTTCTTTCTCTTCTCTTCTGCTACTGCTTGTGATCGCTGTGTGCACCAAACCAAGGTTGCTTATTTCTCCCAAGCCTCTGCACTTTCATCCGGGGCATGTGGATATGGTTCATTAGCATTAAGCTTCAATGGTGGACACCTTGCTGCTGGTGTTCCTTCCCTTTACAAAGATGGAGCTGGTTGTGGTGCATGCTTTCAAATGAGATGCAAGAACCCAACTCTGTGTAGCGGCAAAGGAACCAGAGTGATTCTGACTGATCTCAATCACAGCAACCAAACAGATTTTGTTATCAGCAGCAGAGCTTTCATGGCCTTATCCAACCAGGGCAAGGGCCAAGACATTTTAAAACTTGGAGTTGTCGATGTAGAATACAAA…	MVLFLCFLFFLFSSATACDRCVHQTKVAYFSQASALSSGACGYGSLALSFNGGHLAAGVPSLYKDGAGCGACFQMRCKNPTLCSGKGTRVILTDLNHSNQTDFVISSRAFMALSNQGKGQDILKLGVVDVEYKRVPCEYKNQNLAVRVEESSQKPNYLAVKVLYQGGQTEMVAMDVAQVGSSNWGYMSRNYGAVWDTSRVPNGALQFRFVVTSGYDGKWIWAKNVLPADWKPGMIYNSGVQITDIAKEGCSESECGDGSWK*	8	502052	503766	-1	aCL1709Contig1							Cs8g01880.1	100
CitEXP28	Ciclev10029905m	ATGGCTATCTTGCTTTGCTTTCTCTTCTTTCTCTTATCATCTGCCACTGCTTGTGATCACTGTGTGCACCAATCCAAGGTTTCCTACTTCTCCAAAACCTCCGCACTTTCAAAGGGGGCATGTGGGTATGGCTCGTTGGCATTAGGGTTAGGTAGTGGACACATTGCTGCTGCTGTTCCTTCCATTTACAAAAACGGAGCTGCCTGTGGTGGTACATGCTTTCAGGTAAGGTGCAAGAACAGAGCTCTATGTAGCAGAAAAGGAACCAGAGTGATTGTGACCGATCTCAATCACAACAACAAAACAGACATGGTCCTCAGCAGGAGAGCTTTCAGGGCACTGGCCAACAAGGGCATGGACAATGAAATCTTGAAACAGAGAGCTGTGGATGTGGAATAC…	MAILLCFLFFLLSSATACDHCVHQSKVSYFSKTSALSKGACGYGSLALGLGSGHIAAAVPSIYKNGAACGGTCFQVRCKNRALCSRKGTRVIVTDLNHNNKTDMVLSRRAFRALANKGMDNEILKQRAVDVEYIRVPCEYKHHNLAVRVEESSKNPNYLAIKVLYQGGKTEILGVVLSEYGSPVRIDMRRKFGAVWETDRAPKGPLQFGFPIVQGFDVKWIWAKNPVPADWKIGVTYDAGVQITDVDFTDGCAECGPWN*	8	651326	652763	1								Cs8g02110.1	100
CitEXP29	Ciclev10029094m	ATGGCGGTGGTGAATTGGGCTGGCGTTATCCTCTCTTTAGTATGCTTAATGTGGGTGGCTGATGCAAGACTCCCTGGCGATTACTCCGGTGGCCCATGGCAAAGCGCCCATGCCACCTTTTACGGCGGCTCTGACGCCTCCGGTACCATGGGAGGAGCGTGCGGTTACGGTAACTTGTACAGCCAGGGCTACGGCGTGAACACAGCGGCGCTGAGCACGGCGCTGTTCAACAATGGCTTGAGCTGCGGTGCTTGCTTTGAGATCAAGTGTGCAAACGAACCCGCGTGGTGTCACTCCGGGAGCCCTTCCATTTTGGTTACCGCTACAAACTTTTGCCCGCCCAATTACGCACTCCCAAGTGACAATGGCGGCTGGTGTAACCCTCCTCGCCCTCATTTT…	MAVVNWAGVILSLVCLMWVADARLPGDYSGGPWQSAHATFYGGSDASGTMGGACGYGNLYSQGYGVNTAALSTALFNNGLSCGACFEIKCANEPAWCHSGSPSILVTATNFCPPNYALPSDNGGWCNPPRPHFDLAMPMFLKIAEYRAGIVPVSYRRVPCRKKGGIRFTINGFRYFNLVLVTNVAGAGDILRVNVKGSRTGWMSMSRNWGQNWQSNAVLIGQSLSFRVKASDRRSSTSWNIVPANWQFGQTFVGKNFRV*	8	23533364	23535946	-1	aCL723Contig1							Cs8g18640.1	100
CitEXP30	Ciclev10005627m	ATGGCTACTAGAAGTAGTGTTAGCTTGTCCCTTTCATTTTTCCTAGCTTTTCTTTGCTACTTGGAGCTTTGCTCTTGCTTTTACCCCAAACATCTCAACTTGTCAGCCGTGGGAACCCACTGGTCGACCGCCGGAGCCACCTGGTATGGCAGCCCTGACGGTGCCGGAAGTGACGGAGGTGCTTGTGGGTATGGCAATGCAGTGTCACAAAGCCCTTTCTCTTCTTTTGTGACCGCCATAGGTCCAAGCCTTTATAAATCCGGCAAGGAATGCGGTGCTTGCTATCAGGTCAAGTGCACAAGGCATCCAGCATGTTCAGGCAAAGCAGTTCGAGTTGTGATAACAGATTTTTGTCCCGGCGGTCCATGTGTGTCGGAATCTGCACATTTCGACCTCAGC…	MATRSSVSLSLSFFLAFLCYLELCSCFYPKHLNLSAVGTHWSTAGATWYGSPDGAGSDGGACGYGNAVSQSPFSSFVTAIGPSLYKSGKECGACYQVKCTRHPACSGKAVRVVITDFCPGGPCVSESAHFDLSGTAFGAMAIPGQEEKLRDAGVLEVRYARVACDYSGRNIAFHVDQGSNPNYLAVVVEFEDGDGDLAGVDVKEGSGEWRAMQQSWGATWKLNAGSELHPPLSLRLTSQYSGQTLVANNVIPQGWMPGATYRSLVNYNV*	9	26809709	26811810	1								Cs9g15150.1	99.3

## Sheet: Lignin
Gene name	Phytozome v10.2	CDS	peptide	Scaffold	Gene start	Gene end	Strand	Gene prediction	CDS	peptide	Scaffold	Gene start	Gene end	Strand	C. sinensis	% similarity
CitXXX.XX	INDUCED only in AZ-C
CitXXX.XX	INDUCED in both AZ-C and fruit rind
CitXXX.XX	INDUCED only in fruit rind
CitXXX.XX	REPRESSED only in AZ-C
CitXXX.XX	REPRESSED in both AZ-C and fruit rind
CitXXX.XX	REPRESSED only in fruit rind
CitXXX.XX	No hybridization results
LIGNIN BIOSYNTHESIS
Phenylalanine ammonia-lyases
CitPAL1	Ciclev10030821m	ATGGAGTTGTCACATGAAACATGCAATGGCATCAACAATGATAGGAATGGTGGTACTTCGTCATTGGGGTTGTGCACAGGTACTGACCCTTTGAACTGGACCGTGGCAGCGGACTCATTGAAAGGGAGTCACCTTGATGAAGTGAAACGGATGGTTGACGAGTACAGGAGGCCGGTGGTGAAGCTGGGCGGCGAGTCCTTGACCATAGGCCAAGTGACTGCTATCGCGGCCCACGACTCTGGAGTCAAGGTGGAGCTAGCGGAGGCCGCCCGCGCCGGCGTCAAGGCCAGCAGCGATTGGGTGATGGACAGCATGATGAAAGGGACTGATAGCTATGGTGTCACCACTGGCTTTGGTGCAACTTCTCACCGGCGAACCAAGCAAGGTGGTGCTTTGCAA…	MELSHETCNGINNDRNGGTSSLGLCTGTDPLNWTVAADSLKGSHLDEVKRMVDEYRRPVVKLGGESLTIGQVTAIAAHDSGVKVELAEAARAGVKASSDWVMDSMMKGTDSYGVTTGFGATSHRRTKQGGALQKELIRFLNSGIFGNGTESSHTLPHSATRAAMLVRVNTLLQGYSGIRFEILETITKFLNHNITPCLPLRGTITASGDLVPLSYIAGLLTGRPNSKAVGPNGQVLNPTEAFNLAGVTSGFFELQPKEGLALVNGTAVGSGLAATVLFEANILAIMSEVLSAIFAEVMNGKPEFTDHLTHKLKHHPGQIEAAAIMEHILDGSSYVKAAQKLHEIDPLQKPKQDRYALRTSPQWLGPQIEVIRAATKMIEREINSVNDNPLIDVSRNKAL…	4	6290059	6294163	1	aCL3321Contig1							Cs7g24940.1	100
CitPAL2	Ciclev10011134m	ATGGCTACTTTAGGGTTCCCTTTAGTTGATCTACTTTCATTCACGCCCATTCATTATTCTTCTAGTTGGGGTATCTTTTGTGATTGTAGTAACATTTACGCAAAAGATATGGACAGAGGTGCTGTTATTGAGAATGGTCACCAGAACGGTTGCTTGGAGGGTTTGTGTAAGGACAACAATTACAGTTCTGGGGATGCGTTGAACTGGGGAGTGATGGCGGAGACGTTGAAGGGGAGCCATTTGGAGGAAGTGAAGCGAATGGTGGCGGAGTACAGGAAGCCGGTGGTCAACCTCGGTGGTGAGACGTTGACTGTAGCACAAGTGGCTGCCATTGCGACAGCTGGCGACGTCAACGCCCAAGTCAAAGTGGAGCTCTCAGAATCCGCCAGGGAAGGTGTC…	MATLGFPLVDLLSFTPIHYSSSWGIFCDCSNIYAKDMDRGAVIENGHQNGCLEGLCKDNNYSSGDALNWGVMAETLKGSHLEEVKRMVAEYRKPVVNLGGETLTVAQVAAIATAGDVNAQVKVELSESAREGVKASSDWVMESMNKGTDSYGVTTGFGATSHRRTKNGGALQKELIRFLNAGIFGNGTESSHTLPHSATRAAMLVRVNTLLQGYSGIRFEILDAITKLLNHSITPCLPLRGTITASGDLVPLSYIAGLLTGRPNSKATGPNGEIIDAQEASKQAGFGFFELQPKEGLALVNGTAVGSGLASMVLFDANNLALLSEILSAIFAEVMQGKPEFTDHLTHKLKHHPGQIEAAAIMEHILDGSSYVKAAKKLHEIDPLQKPKQDRYALRTSPQ…	6	10000924	10003899	1	aCL7198Contig1							Cs6g11950.1	95.2
CitPAL3	Ciclev10011175m	ATGGAGATAGGTGCCACTACTGAGAATGGTCACCAGAACGGTGGCCTGGAGGGTTTGTGCAAGAATAACAATTACAATTACAGTTCTGGGGATGCGTTGAACTGGGGAGTGATGGCGGAGACGTTGAAGGGGAGCCATTTGGAGGAAGTGAAGCGTATGGTGGCGGAGTACAGGAAGCCGGTGGTCAACCTCGGTGGTGAGACGTTGACCGTAGCACAGGTGGCTGCCATTGCCACGTCCTCTACGAATGTGGAGCTGTCGGAATCTGCCAGGGAAGGCGTCAAGGCCAGCAGTGATTGGGTGATGGAGAGCATGAATAAGGGTACCGACAGTTACGGCGTTACCACTGGCTTTGGTGCCACTTCTCATCGGAGAACCAAGAACGGCGGTGCTCTTCAG…	MEIGATTENGHQNGGLEGLCKNNNYNYSSGDALNWGVMAETLKGSHLEEVKRMVAEYRKPVVNLGGETLTVAQVAAIATSSTNVELSESAREGVKASSDWVMESMNKGTDSYGVTTGFGATSHRRTKNGGALQKELIRFLNAGIFGNGTESSHTLPHSATRAAMLVRVNTLLQGYSGIRFEILEAITKLLNHNITPCLPLRGTITASGDLVPLSYIAGLLTGRPNSKATGPNGEIIDAQEASKQAGFGFFELQPKEGLALVNGTAVGSGLASMVLFEANNLALLSEILSAIFAEVMQGKPEFTDHLTHKLKHHPGQIEAAAIMEHILDGSSYVNVAKKLHEIDPLQKPKQDRYALRTSPQWLGPQIEVIRFATKSIEREINSVNDNPLIDVSRNKALHG…	6	10016564	10019369	-1	aCL1166Contig2							Cs6g11940.1	100
CitPAL4	Ciclev10027913m	ATGGAGGCATCGCATGAGAATCAAAGTGGAGGCAATATTCCCTCGGGAAAATTGTGCACTAACATTGATCCATTGAATTGGGTATCAGCTTCGGAGTCGTTGAAGGGGAGCCATTTGGATGAAGTGAAGAGGATGGTTAGCGAGTACCGGAAGCCGGTGGTGAGGCTAGGCGGCGAGACCCTGACGATAGCTCAGGTGGCGGCGGTGGCTAGCCGTGATGACGGGGTCACGGTGGAGCTTAACGAGGAGGCTAGGGCTGGCGTCAAGGCTAGCAGTGATTGGGTTATGGAGAGCATGAACAACGGGACAGATAGCTATGGTGTCACGACTGGTTTTGGTGCAACTTCTCATAGGAGGACCAAACAGGGAGCTGCCTTGCAAAAGGAGCTCATTAGGTTT…	MEASHENQSGGNIPSGKLCTNIDPLNWVSASESLKGSHLDEVKRMVSEYRKPVVRLGGETLTIAQVAAVASRDDGVTVELNEEARAGVKASSDWVMESMNNGTDSYGVTTGFGATSHRRTKQGAALQKELIRFLNAGIFGKGTESCHMLPHTATRAAMLVRINTLLQGYSGIRFEILEAITKFLNRKITPCLPLRASITASGDLVPFSYIAGLLTGRPNSVAVGPNGESLNAAEAFSQAGIDGGFFELQPKEGLALVNGTGVGAGLASIVLFEANILTVLSEVLSAIFAEAMQGKPEFTDHLTHKLKHHPGQIEAAAIMEHILDGSSYVEAAQKFHEIDPLQKPKQDRYALRTSPQWLGPQAEVIRASTKSIEREINSVNDNPLIDVSRNKALHGGNFQ…	8	21712357	21716095	-1								Cs8g16290.1	98.9
CitPAL5	Ciclev10027912m	ATGGAGGCATCGCATGAGAATCAAAGTGGAGGCAATATTCCCTCGGGAAAATTGTGCACTAACATTGATCCATTGAATTGGGTATCAGCTTCGGAGTCGTTGAAGGGGAGCCATTTGGATGAAGTGAAGAGGATGGTTAGCGAGTACCGGAAGCCGGTGGTGAGGCTAGGCGGCGAGACCCTGACGATAGCTCAGGTGGCGGCGGTGGCTAGCCGTGATGACGGGGTCACGGTGGAGCTTAACGAGGAGGCTAGGGCTGGCGTCAAGGCTAGCAGTGATTGGGTTATGGAGAGCATGAACAACGGGACAGATAGCTATGGTGTCACGACTGGTTTTGGTGCAACTTCTCATAGGAGGACCAAACAGGGAGCTGCCTTGCAAAAGGAGCTCATTAGGTTT…	MEASHENQSGGNIPSGKLCTNIDPLNWVSASESLKGSHLDEVKRMVSEYRKPVVRLGGETLTIAQVAAVASRDDGVTVELNEEARAGVKASSDWVMESMNNGTDSYGVTTGFGATSHRRTKQGAALQKELIRFLNAGIFGKGTESCHMLPHTATRAAMLVRINTLLQGYSGIRFEILEAITKFLNRNITPCLPLRASITASGDLVPFSYIAGLLTGRPNSVAVGPNGESLNAAEAFSQAGIDGGFFELQPKEGLALVNGTGVGAGLASIVLFEANILTVLSEVLSAIFAEAMHGKPEFTDHLTHKLKHHPGQIEAAAIMEHILDGSSYVKAAQKLHEIDPLQKPKQDRYALRTSPQWLGPQAEVIRASTKSIEREINSVNDNPLIDVSRNKALHGGNFQ…	8	21740299	21744083	-1	aC02002A11SK_c							Cs8g16290.1	99
trans-cinnamate 4-hydroxylase
CitC4H1	Ciclev10008125m	ATGACATCCTTTTACCCTCCAACTCCTATCTCTATCCCAATATTTGGCAATTGGCTCCAAGTTGGCAATGACCTTAACCACAGGTTACTAGCATCAATGGCACAAATTTACGGCCCCGTATTCCGTCTAAAACTTGGTTCAAAAAATTTAATAGTGGTATCAGAGCCAGACCTAGCTACCCAAGTACTACACACGCAAGGTGTAGAATTCGGATCCCGCCCACGCAACGTGGTTTTCGATATTTTCACGGGCAATGGACAGGACATGGTGTTCACTGTTTATGGTGAGCATTGGCGCAAAATGCGTAGGATTATGACACTGCCATTTTTCACCAATAAAGTTGTGCACAATTACAGTGACATGTGGGAGCAGGAAATGGACCTAGTGGTGCATGACTTG…	MTSFYPPTPISIPIFGNWLQVGNDLNHRLLASMAQIYGPVFRLKLGSKNLIVVSEPDLATQVLHTQGVEFGSRPRNVVFDIFTGNGQDMVFTVYGEHWRKMRRIMTLPFFTNKVVHNYSDMWEQEMDLVVHDLKNDYESVSTKGIVIRKRLQLMLYNIMYRMMFDAKFESQEDPLFIEATRFNSERSRLAQSFEYNYGDFIPLLRPFLRGYLNKCRDLQSRRLAFFNNNFVEKRRKIMAANGEKHKISCAIDHIIDAQMKGEITEENVIYIVENINVAAIETTLWSMEWAIAELVNHPEVQQKIRREISTVLKGNPVTESNLHELPYLQAAVKEVLRLHTPIPLLVPHMNLEEAKLGGFTIPKESKIVVNAWWLANNPKWWEKPEEFRPERFLEEECNI…	1	26385359	26387485	1	aC06006C03SK_c							Cs4g04530.1	90.9
CitC4H2	Ciclev10000921m	ATGGATCTCCTCTTGCTGGAAAAGACGCTTTTAGCCCTCTTCGCCGCCGTTGTTGTCGCCATTACCGTCTCTAAACTCCGCGGAAAGCGCTTCAAGCTCCCCCCCGGCCCCCTCCCCGTCCCCGTATTCGGCAACTGGCTCCAGGTCGGCGATGACTTGAACCATCGGAACCTCTCCGACTTAGCCAAGAAATATGGAGATGTCCTCCTCCTCCGCATGGGCCAGCGCAACCTCGTCGTCGTCTCGTCGCCGGACCACGCCAAGGAGGTTCTGCACACGCAGGGAGTGGAGTTCGGATCACGAACGAGGAACGTCGTGTTCGATATCTTCACTGGGAAGGGCCAGGACATGGTGTTCACAGTGTACGGCGAGCACTGGCGGAAGATGCGGAGGATCATG…	MDLLLLEKTLLALFAAVVVAITVSKLRGKRFKLPPGPLPVPVFGNWLQVGDDLNHRNLSDLAKKYGDVLLLRMGQRNLVVVSSPDHAKEVLHTQGVEFGSRTRNVVFDIFTGKGQDMVFTVYGEHWRKMRRIMTVPFFTNKVVQQQRFNWEDEAARVVEDVKKDPEAATNGIVLRRRLQLMMYNNMYRIMFDRRFESQDDPLFNRLKALNGERSRLAQSFEYNYGDFIPILRPFLRGYLKICKEVKERRLQLFKDYFVEERKKLASTKSMSNESLKCAIDHILDAQTKGEINEDNVLYIVENINVAAIETTLWSIEWGIAELVNHPEIQKKLRNELDTVLGPGHQITEPDTHKLPYLQAVIKETLRLRMAIPLLVPHMNLHDAKLGGYDVPAESKILVN…	5	15445701	15450041	1	aCL959Contig1							Cs1g08620.1	100
4-coumarate:CoA ligases
Cit4CL1	Ciclev10007733m	ATGTGGTGTCGCTTGGTGCAAAACGACCGCCTCATCATTACCCCAAAAAGGGTTAAAGTACGCACATGCAATGCCCACATAACTGGTTGGTCACATCCTCCGTGGCTTATAATTGGTGGCTTACAGTCAAAGCTGATGACTTTCACGCACCATAGTCTATCCCCAAGTACGCCCTCTCACGGAAGCAAAAATAACCAAACACTCACCATCCCCTTTGCTTCCCAAAATTTCTCCCTCTCTCATTTCTCTCATATCCATATTCTCTTTGCAAAAATGGAGGCCAAACAAGATCACCAAGAATTCATTTTCCGATCAAAGTTGCCCGATATTTACATCCCAAATCACCTCCCTTTACACACTTACTGCTTTGAAAACATTTCCCAATTCGCAGACCGCCCC…	MWCRLVQNDRLIITPKRVKVRTCNAHITGWSHPPWLIIGGLQSKLMTFTHHSLSPSTPSHGSKNNQTLTIPFASQNFSLSHFSHIHILFAKMEAKQDHQEFIFRSKLPDIYIPNHLPLHTYCFENISQFADRPCIINGPTGDVYTYADVELTSRKFAAGLSKLGVQKGDVIMLLLQNCPQFVFAFLGASYIGATSTTANPFYTPAEIAKQAIASKAKIIITQAVYNDKVRDLSEHHGARIVTIDPPPENCLHFSELITQADENEIPAVKINPDDVVALPYSSGTTGLPKGVMLTHRGLVTSVAQQVDGENPNLYLHKEDVILCVLPLFHIYSLNSVLLCALRVGAAILIMQKFEIVKLMELVQKYKVTVAPFVPPIVLAVAKSGDVDKYDMSSIRTVMS…	1	27308614	27316115	1	aCL5929Contig1|aCL7230Contig1							Cs4g03330.1	85.7
Cit4CL2	Ciclev10014804m	ATGGAGAAAAAGACCCCGCAACTGTTCGATACGAAGAGCGGCTTCAACTCAGCAACGAAAACATTTCACAGCCTGAGGCCCCCCATTGATCTTCCACCGGAAGACGCGCCAATCTCTGCCGTTGATTACGTTTCCTCACTCAGAGCCACCTTGCCTTGGCGTGATGACGACACTGTCGCTTTGATCAACTCAGTCACCGGCCTGCGCGTTTCTTTCTCCGAGTTCACTCGCCGAACCAACTCACTAGCTTCTTATCTCCAGAACGTAACCAGACTCTCCAAAAACGACACCGCTTTTGTACTCTCTACAAACTCCATCGAAATACCGATTCTCTACTTCTCTCTACTCTCACTCGGCGTTATTATTTCTCCGGCGAATCCAGTCAACACCGAGTCAGAG…	MEKKTPQLFDTKSGFNSATKTFHSLRPPIDLPPEDAPISAVDYVSSLRATLPWRDDDTVALINSVTGLRVSFSEFTRRTNSLASYLQNVTRLSKNDTAFVLSTNSIEIPILYFSLLSLGVIISPANPVNTESEISRQIQLSNPVIAFATSSVVHKLAKLKHRTILIDSPEFDSMTMSWNSKHELDRAKVCQSDVAAIMYSSGTTGRVKGVMLTHRNLTAAVASSFASSPKRVSPAVMLFTMPYFHIYGLFFCFRAAALMETAVVMQRFDLKMMLKAVEEFRVTHAAVTPPIVVAMSKGGSTDGYDLSSLETVACGAAPLGKDTIMAFASKFPKVVLVQAYGLTESTAGVFRTVGPDECRRWGSTGRLSAGLEAKIVDPETGDSLPPGKEGELSIRGPTI…	2	14143537	14146003	-1								Cs2g24760.1	100
Cit4CL3	Ciclev10019547m	ATGGCGGGGACAAACAGCAACGGTCTGATTGATCCAAACAGCGGCTTTTGTTCACAGACGAAAACATTCCACAGCGTAAGACCAAAGATTCCTCTGCCGCCATCGTCTCAGCCTCTCTCCGTCACACAATTCACTTTATCGATCCTCCACAAATCAGCCACCACGACCGCCGCACCATTTCTCATGAACGCCGCCACCGGTCGACGCCTCACTTACCCTGAGTTCCTCCGCCAAACCAACTCCCTCACGCTCTCCCTCCAAAAGCATTACTCTCTCTCCAAGAACGACGTCGCCTTCATCCTCTCCCCTTCCTCTTTCGAGATCCCCGTCCTCTACTTCTCCCTTCTCTCCCTCGGCGTGGTCGTCTCTCCCGCCAACCCGCTGGGGTCCACCTCAGAA…	MAGTNSNGLIDPNSGFCSQTKTFHSVRPKIPLPPSSQPLSVTQFTLSILHKSATTTAAPFLMNAATGRRLTYPEFLRQTNSLTLSLQKHYSLSKNDVAFILSPSSFEIPVLYFSLLSLGVVVSPANPLGSTSEISHQLHLSKPSIAFATSRTSHKLPPNFRTVLVDSPEFLSLLSTQHQNDVVISPPAVVNQSDAAVILYSSGTTGKVKGVLLTHRNIISLVASFHHVEYGANPTEQPQPSGEVSLITLPLFHVFGFLALVRVVAVSETAVFMERFDFETMLKTVDKYKLTSMPVSPPLVVALTKSELTKKYDLSSLQYLSCGGAPLGKEVTDKFKEKFPSVEIIQGYGLTECGGLASSMRDSEETKRHGSVGRLHELMEAKVVDPVTGDALSPAQKGE…	3	4212101	4216950	-1	aCL2088Contig1							Cs5g06980.1	96.8
Cit4CL4	Ciclev10019532m	ATGATATCAATAGCCACTAAAAAACCAGAGCTGTCTCTTGATATCTCTTCACCAGCACCACCAGCGCCGTCCAATGAAAAGATAGCCACCCATATTTTCAAATCAAAGCTTCCCGATATACCCATCTCCAATCATCTCCCTCTCCACACATATTGTTTCCAGGATCGTTTATCTGACGACCCATGCTTAATCGTTGGCTTAACTGGCAAAACTTACTCTTATGCCGAAACGCACCTCATCTGTAGAAAAACCGCAGCCGGTTTATCGAACCTCGGCATCAAAAAGGGCGACGTGATCATGATCCTCCTCCAGAACTGTGCCGAATTCGTCTTCTCGTTCATGGGAGCTTCCATGATCGGTGCAGTCACGACGACGGCCAATCCCTTCTACACTTCAGCT…	MISIATKKPELSLDISSPAPPAPSNEKIATHIFKSKLPDIPISNHLPLHTYCFQDRLSDDPCLIVGLTGKTYSYAETHLICRKTAAGLSNLGIKKGDVIMILLQNCAEFVFSFMGASMIGAVTTTANPFYTSAEILKQFRTSGAKLIITMSQYVDRLPKTDKDFTVITIDAPPENCLHFTVLSEADEDQIPEVAIEPDDPVALPFSSGTTGLPKGVVLTHKSLITSVAQQVDGENPNLYLTNGDVVLCVLPLFHIYSLNSVLLCSLRAGAGVLLMQKFEIGALLELIQRHRVSVAAVVPPLVLALAKNPMVADYDLSSIRVVLSGAAPLGKELEDALRSRVPQAILGQGYGMTEAGPVLSMCLGFAKQPFPTKSGSCGTVVRNAELKVIDPEIGASLPH…	3	39867762	39873475	1	aCL2716Contig1							Cs5g24900.1	100
Cit4CL5	Ciclev10033676m	ATGTCGGCCGACGTATCGGAAGAACAAACCGGCAAGTCATCCGGGCCGAAATTCCCGAACAGCGGTTTCGATTCGGAGACCGGAATTTACCATTCACTCATCCAACTCGGTGAAAATTACAGAATACCCACCAGGACAGACCTTGACACGGCCACATTTGTGCTGTCACGGTTCCCACATCCGGACCTTGCTGCGTCACGAGTCGCACTAATCGACTCGGCAACACGCGAGCGAGTTACATACGCGCAACTCCACCGGTCAATTCGTTCGCTCGCTTTCGGGCTCTACCACGCTCTCGGCGTTAGAAAAGGCGACGTCGTTTTTGTTCTGGCACCAAACTCACTGTTGTATCCATCGATATGCTTGGCTATATTCTCACTCGGAGCAATACTTTCCCCC…	MSADVSEEQTGKSSGPKFPNSGFDSETGIYHSLIQLGENYRIPTRTDLDTATFVLSRFPHPDLAASRVALIDSATRERVTYAQLHRSIRSLAFGLYHALGVRKGDVVFVLAPNSLLYPSICLAIFSLGAILSPANPINTESEIVKQVRDSGAKLIISASEELQKLAKVKVPVIVTSRDQSNDKSVSVEELIECCDAADELPGCQLTQDDTAAILYSSGTTGTSKGVILTHANFISIMQLLRWTVDVTHAQNDIFLCMIPMFHIYGLAFFATGLFCCGVTIVVMQRFDLQAMIEAIKTYQVNNIPLVPPVILGLVKYCKDSSYLTSLRRVGSGAAPLSKELADEFRAKIPWVELRQGYGLTESCGATTFMVAPEQARARSGSCGALSPTFCAKVVDTETR…	4	7273840	7276261	1								Cs7g21790.1	99.8
Cit4CL6	Ciclev10031133m	ATGGCAATGCCTAACTCGTTCTCAGTTCCCGTGCCATTAGCAGCAGCACACGATGAAGAGCACATCTTTCGTAGCAGACATCCTGCAGTGCCAGTGCCTGAAAACGTGACGCTGCCTGATTTCGTGCTCCAAGATGCTGAGTTGTACGCGGACAAGGTTGCTTTTGTGGAAGCCGTGAGTGGAAAAGCATACACTTATGCCCAAGTGGCACGGGACACCAGAAGATTTGCCAAGGCTTTGAGGTCTCTTGGGTTGAGAAAGGGGCAAGTAGTGATTGTAGTGCTACCTAATGTTGCTGAGTATGGCATTGTTGCGCTTGGGATCATGGCTGCTGGTGGTGTCTTTTCGGGTGCTAATCCAACAGCGCATGCTTCTGAACTTAAGAAGCAAGTAGATGCT…	MAMPNSFSVPVPLAAAHDEEHIFRSRHPAVPVPENVTLPDFVLQDAELYADKVAFVEAVSGKAYTYAQVARDTRRFAKALRSLGLRKGQVVIVVLPNVAEYGIVALGIMAAGGVFSGANPTAHASELKKQVDAADSKLIVSYAPIYEKVKGLGLPIIVLGEERIESAINWSELLEAADKAGNNFSNDDDVKQTDLCALPFSSGTTGISKGVMLTHRNLVANLCSTLFSVVPEMIGQVTTLGLIPFFHIYGITGICCATLRNKGKVVMMNRFELRAFLDALITHEVTFAPIVPPIILSLVKDPIVDEFDLSKLQLRAVMTAAAPLAPDLLSSFEKKFPGVQVQEAYGLTEHSCITLTYGDPANPSAGSKKNSVGFILPNLEVKFINPETGKSLPSNTPGE…	4	21166166	21168569	1	aCL4232Contig1|aCL5408Contig1							Cs7g10840.1	99.8
Cit4CL7	Ciclev10000735m	ATGATGGAGAAATTTTTACAAACATCTTCGTCAGAAAGAATAAACACTTCCCAATGGTATTTACCCGAAACAGGCATTTATCACAGCAAGCATCCCTCTGTTAACCTTCCCGCGAATGACTCACTTCTTGACGTTGTCTCCTTCATTTTCTCTCACAAACACAATGGCCGCACGGCTCTCGTTGATTCCTTATCTGGGTACTCAATCTCTTACCCGCAGCTCTTCCCTTTGGTGCAGTCTGTGGCCTCTGGTCTCCGCCACCACTTTGGCATTTCACAAGGTGATGCCGTTTTGCTCCTTTTGCCCAATTCCATTTACCTTCCTGTCATTTTCTTGGCTCTTTTGTACTTGGGTGCTATTGTAATTCCAATGAATCCATTGCTTAGTGTTTCAGAAATC…	MMEKFLQTSSSERINTSQWYLPETGIYHSKHPSVNLPANDSLLDVVSFIFSHKHNGRTALVDSLSGYSISYPQLFPLVQSVASGLRHHFGISQGDAVLLLLPNSIYLPVIFLALLYLGAIVIPMNPLLSVSEIKKQVTLCKTKISLAFTIYENVDKLRSWGTTPVIAVPENLINDFKEGRFSDFHKLITGKFDLVERPVIRQQDTAAILNSSGTTGASKGAVLTHGNFIAAVELFVRFEASQYEYLSSEAVFLAVLPMFHIYGLSLFTLGLLSLGASVVVMRRFEASEMLKVIDKYGVTHFPVVPPILMALTKAAKGLCGNSLKSLKQVSSGAAPANSKIIEDFVGAFPHVDFIQGYGMTESTAVGTRGFNTKKFSKYFSVGLLAPNMQAKVVDWVNGC…	5	25965963	25969199	1	aC31504D07EF_c							Cs3g08510.1	100
Cit4CL8	Ciclev10000764m	ATGGCATCAAACACTAGAATCGATTCAAGAAGTGGATTCTGCAAATCAAATTCCATCTTCTACAGCAAACGCAAGCCAGTTTCACTCCCACCAAACGAGTCTCTAGACGTGACGACATTCATCTCCTCGCGGGCCCATCATGGCAGAACCGCCTTCATCGACGCGGCCACGGGCCGCCACCTCACCTTCTCCGAGCTCTGGCGAGCGGTTGATTCGGTCTCCACGTGCCTCTCCGATATGGGAATCAGAAAAGGTCATGTCATCCTCCTCCTTTCCCCTAATTCAATTTTCTTTCCAGTCGTCTGTCTCGCTGTCATGTCACTCGGTGCCATTATCACCACGACTAATCCTCTCAACACCAAACAAGAAATCGCCAAGCAAATCGCTGATTCGAAACCT…	MASNTRIDSRSGFCKSNSIFYSKRKPVSLPPNESLDVTTFISSRAHHGRTAFIDAATGRHLTFSELWRAVDSVSTCLSDMGIRKGHVILLLSPNSIFFPVVCLAVMSLGAIITTTNPLNTKQEIAKQIADSKPVLAFTISQLVPKLAGSTLPIVLLDDEKTTSTEGIKTVTTLPQMMRKEPSGTLVRDRINQDDVATLLYSSGTTGASKGVVSSHRNLIAMVQTVLGRFKLEDGEQTFICTVPMFHIYGLAAFATGLLASGSTIVVLSKFDMHEMLSSISKYRATYLPLVPPILVALISGADQIRSKYDLSSLQSVLSGGAPLSREVIEGFVQKYPKVRILQGYGLTESTGIGASTDSLEESRKYGTAGMLSPSMEAKIVDPDSGKALLVNQTGELWLK…	5	42516006	42519605	-1	aCL3495Contig1|aC21001D05Rv							Cs3g27010.1	100
Cit4CL9	Ciclev10025280m	ATGTTTATCAAAAAAGCTTCTGTTCGTAATCATTTTCATCATACCAACTTTTTAGTTTCTTCAATGGAGACTCAAACTCAAACACAAACACAAACCAAGCAACAAGAAGAGATCATTTTCCGATCAAAGCTCCCCGATATTTACATCCCTAAACACCTCCCTTTACACTCTTACTGCTTTGAAAACATCTCAAAGGTAGCTTCACGCCCTTGTTTGATCAATGGCTCCACCGGCGACGTCTACACTTACGGGGAAGTCGAGCTGACTGCGCGTAAAATCGCTTCTGGGTTAAACAAGCTGGGCATCGGACAACGCGATGTGATCATGCTCTTGCTCCCGAACGTGCCCGAGTTCGTGTTCTCCTTCCTCGGAGCATCTTACCGCGGCGCCATTGCCACT…	MFIKKASVRNHFHHTNFLVSSMETQTQTQTQTKQQEEIIFRSKLPDIYIPKHLPLHSYCFENISKVASRPCLINGSTGDVYTYGEVELTARKIASGLNKLGIGQRDVIMLLLPNVPEFVFSFLGASYRGAIATAANPFFTPAETCKQAKASGAKLIITKASYVDKVKDLEEVKIMCIDSPPDGCLHFSELTQADEKDLPHVDILPDDVVALPYSSGTTGLPKGVMLTHKGLVTSVAQQVDGENPNLYFTKEDAILCVLPLFHIYALNSIMLCGLRAGAAILIMQKFEINSLLQLIERYKVTVAPVVPPIVLAIAKSPETEKYDLSSIRILKSGAAPLGKELEDAVRIKLPNAILGQGYGMTEAGPVLAMCLSFAKEPFEIKAGACGTVVRNAEMKIVDP…	7	15456948	15460803	-1	aCL2432Contig1							orange1.1t04489.1	99.3
Cit4CL10	Ciclev10028139m	ATGGAGAAATCTGGTTATGGCCGTGATGGTATCTACAGATCTTTAACGCCACCTTTGGTTCTTCCCAGTGACCCCAGTTTTTCTATGGTTAATTTTCTCTTTAGAAACTCTGCTTCTTATAGCTCCAAATTAGCACTTATTGATGCTAATTCTGATGAATCTTTGTCTTTTTCCCAGTTCAAATCCATTGTGATCAAGGTTTCTCATAGCTTTCGCCATCTGGGCATTACGAAAAAAGATGTTGTTTTGATTTTTGCTCCAAATTCAATTCATTTCCCTATTTGCTTTCTTGGTGTCATTGCTATAGGCGCTATAGCATCAACTGCGAATCCTGTTTACACGGTCTCTGAGCTTTCAAAGCAAGTCAAGGATTCCAATCCAAAACTTGTTATTACAGTC…	MEKSGYGRDGIYRSLTPPLVLPSDPSFSMVNFLFRNSASYSSKLALIDANSDESLSFSQFKSIVIKVSHSFRHLGITKKDVVLIFAPNSIHFPICFLGVIAIGAIASTANPVYTVSELSKQVKDSNPKLVITVPELWDKVKDLNLPAVLLGSKDKVSSSGLISRSSKIVSFHDLIELSGSVTDIPDVSVKQTDAAALLYSSGTTGVSKGVILTHKNFIAASLMISAHQELVGELDHVVLCVLPMFHVFGLSVILYDQLQKGNCVVSMGKFDIEMALRAIEKYRVTVWWVVPPIILALAKNSLVRKFDISSLKLVGSGAAPLGKELMEDCQKNIPGAIFQGYGMTETCAPISLENPLVGVRHSGSAGTLLVGVEAQIVSVDTLKPLPPNQLGEIWVRGPN…	8	21381173	21385223	1								Cs8g15810.1	88.5
Cit4CL11	Ciclev10028138m	ATGGAGAAATCTGGTTATGGCCGTGATGGTATCTACAGATCTCTGAGGCCGCCTTTGGTTCTTCCCAGTGAGCCCAATCTTTCTATGGTTCATTTTCTTTTTAGAAACTCTGCCTCTTATCCCTCCAAGCCAGCACTCATTGATGCTGATTCTGGTGAATCTTTGACCTTTTCGCAACTCAAATCCACTGTGATTAAGGCCTCTCATGGCTTTCGCCATCTGGGTATTACAAAAAATGATGTTGTTATGATCTTTGCCCCAAATTCAACTCAGTTTCCTGTTTGCTTTCTTGGTGTTATTGCTACAGGCGCCATAGCAACAACTGCTAATCCTGTTTACTCTGTCTCTGAACTGTCAAAGCAAGTTATAGATTCAAATCCAAAACTCATCGTCACTGTA…	MEKSGYGRDGIYRSLRPPLVLPSEPNLSMVHFLFRNSASYPSKPALIDADSGESLTFSQLKSTVIKASHGFRHLGITKNDVVMIFAPNSTQFPVCFLGVIATGAIATTANPVYSVSELSKQVIDSNPKLIVTVPELWDKVKDFNLPAVLLGSKSKLASCGLSSSSKIVHFHDLIELSGNISNFPDVSIKQTDTAALLYSSGTTGVSKGVILTHKNFIASSLMVTMDQETAGELDYVFLCVLPLFHVFGLAVITCGQLQKGSCIILMAKFDLEMFLRAIEKHRVTHIWVVPPLILALAKHGLVKKFDLSSLKLVGSGAAPLGKELMEECAKNVPSATVIQGYGLTETSGIATMENSFAGSRNIGSAGALAPGVEALIVSVDTQKPLPPNQLGEIWLRGPN…	8	21415878	21420112	1	aCL5511Contig1							Cs8g15880.1	99.6
p-coumarate 3-hydroxylase
CitC3H1	Ciclev10019813m	ATGGAACTCTTTCTCTTTATCATATCGATCATCATCTTCATCTTATTCGTTTACAGGCTGTATCCATGGCTGAGATACAGGCTCCCACCAGGTCCATATCCATGGCCAATCATAGGAAACCTGTTGGATGTAAAACCAGACAGATGCCGGTGTTTTGCTGAGTGGTCAAAGATTTACGGTCCAATCATGTCCGTATGGATAGGCTCATCATTGAATGTTATAGTGTCAAATTCAGAACTGGCCAAGCAAGTGCTCAAAGACTGTGACCAGCAGTTAGCCAATAGGCACCGACCCAAGGCAGTGGCTATCATTTCCAAAGGTGGTACAGATCTTGTATGGGCCGATTATGGGGCCCACTATGTTAAGGTGCGAAGAGTATGCACCCTTGAACTCTTCTCC…	MELFLFIISIIIFILFVYRLYPWLRYRLPPGPYPWPIIGNLLDVKPDRCRCFAEWSKIYGPIMSVWIGSSLNVIVSNSELAKQVLKDCDQQLANRHRPKAVAIISKGGTDLVWADYGAHYVKVRRVCTLELFSPKRTEALRPIREEEVRAMIASIFKDSTNSSNSLVLRKYLGSVAFNNITRLVFGKRFESEEGVVDGQGLEFRAIVANEFKLGIPQGLVEHISWLRWIRWLGDDEAFTKHLAHKDGLTRAIMEEHKAKSMKSGVVKQHFVDALLSRREIHGLSEDTIMGLLWNMITAGMDTVAITVEWAMAELVMNPRVQHKAQEELDRVIGLNRGMNESDTLNLPYLRSVAKEALRLHPPTPLMLPHKANAHVKIGGFDIPKDTIVSVNVWAIARDS…	3	2086561	2088137	-1	aCL5384Contig1|aC32104F09EF_c							Cs5g03970.1	69.8
CitC3H2	Ciclev10000848m	ATGTTCTATACTCCATGTTCTTTCTCATATCAAACAACAATTATGGCTCTTCACGTTCTCTTCCTCACAATATTCTTCATCTTCCTGTCCTACAAGCTTTACCAAAAGCTCAGACTGAAGCTACCACCAGGGCCACGGCCATGGCCCGTCGTGGGAAACCTCTACCACTTAAAACCTGTCCGATATCGGTTGTTTGCCGAGTGGGCTCAGACTTACGGGCCTATAATGTCCGTTTGGTTCGGTTCCACTTTAAACGTCGTTATTTCGAGCTCGGAGTTGGCCAAGCAAGTTCTTAAAGAAAATGATCAACAATTATCAAATAGGCGCAGAAGTAGAGCAGCTCTTAGGCTTTCTAGAAATGGAAAAGACCTTATTTGGGCTGACTATGGTCCTCATTAT…	MFYTPCSFSYQTTIMALHVLFLTIFFIFLSYKLYQKLRLKLPPGPRPWPVVGNLYHLKPVRYRLFAEWAQTYGPIMSVWFGSTLNVVISSSELAKQVLKENDQQLSNRRRSRAALRLSRNGKDLIWADYGPHYVKVRKVSTLELLSSKKLEALRPIREDEVTAMVESIFRDCTNPEKKGQNMKLRDYLSAVSFNNITRLVLGKRFMSPEGVLNEQGIEFKDILGNGVKLGAPVTLAEYTPWLRWMFPLEEEKYVKHNERRDKLTKTIMAEHTLARQKGGGAAKPHFVDALLNLQEEYELSDDTIIGLLWNMIIAGMDTTTITVEWAMAELIKNPRVQQKAQEELDQVVGPNRVMTEADFQNLHYLQCVVKESMRLHPPTPLMLPHKANADVKISGYNVP…	5	20487352	20489738	-1	aCL627Contig1							orange1.1g020970m	60.9
CitC3H3	Ciclev10011520m	ATGACTCTCCCACTCATCCCATTATCAATCATTTTCATCATCCTTGCATACAAGCTCTACCAACGGCTGAGATTCAAGCTCCCGCCCGGCCCTCGTCCCTTGCCAATCGTCGGAAACCTCTACGACATAAAGCCGGTGAGGTTCCGGTGCTTTGCGGAATGGGCTCAACAATACGGACCAATCATTTCGGTTTGGTTCGGCTCGACTTTGAACGTGATTGTGTCCAACACAGAATTGGCTAGAGAAGTGCTTAAAGAGCATGATCAACAATTGGCCGACAGGCATCGAAGTAGATCAGCTGCAAAGTTCAGCAGAGATGGCAAGGACCTCATTTGGGCCGATTATGGGCCTCACTACGTCAAGGTTCGTAAAGTCTGCACGCTCGAGCTTTTTACGCCG…	MTLPLIPLSIIFIILAYKLYQRLRFKLPPGPRPLPIVGNLYDIKPVRFRCFAEWAQQYGPIISVWFGSTLNVIVSNTELAREVLKEHDQQLADRHRSRSAAKFSRDGKDLIWADYGPHYVKVRKVCTLELFTPKRLQALRPIREDEVTAMVESIFKDCTDPQNYGKSVLVKKYLGAVAFNNITRLAFGKRFVNSEDVMDEQGKEFKAIVANGLKLGASLAMAEHIPWLRWMFPLEEGAFAKHGERRDRLTRAIMEEHTLARQKSGGTKQHFVDALLTLQEKYDLSEDTIIGLLWDMITAGMDTTAISTEWGMAELIKNPRVQQKAQEELDRVIGFERVMTETDFSNLPYLQAVAKEALRLHPPTPLMLPHRANANVKIGGYDVPKGSNIHVNVWAVARD…	6	21816068	21819488	-1	aCL1529Contig1							Cs6g16650.1	100
Caffeoyl shikimate esterase
CitCSE	Ciclev10026080m	ATGCCTCAAGAAACGCAGCCCGAAACGCCTCCTAATTACTGGGGCTACATGCCGGAAGAGGAGTACTACACGTCTCAGGGAGTGCGAAACGGTAAAGAGTACTTCGAAACGCCCAACGGGAAGCTCTTTACGCAGAGTTTCCTGCCGTTGGATCAAAAGGTGAAGGCCACGGTGTACATGACCCACGGCTATGGATCGGACACCGGCTGGATGTTTCAGAAGATTTGCATCAGCTATGCTACGTGGGGCTACGCTGTCTTTGCCGCTGATCTTCTTGGACACGGCCGATCGGACGGCATACGTTGCTATCTAGGTGACATGGAGAAGGTCGCTGCTTCGTCCCTATCATTCTTCAAGCATGTGCGCCACAGCGAACCATACAGGGACTTGCCCGCTTTC…	MPQETQPETPPNYWGYMPEEEYYTSQGVRNGKEYFETPNGKLFTQSFLPLDQKVKATVYMTHGYGSDTGWMFQKICISYATWGYAVFAADLLGHGRSDGIRCYLGDMEKVAASSLSFFKHVRHSEPYRDLPAFLFGESMGGAATMLMYFQSEPNTWTGLIFSAPLFVIPENMKPSKLHLFMYGLLFGLADTWAAMPDNKMVGKAIKDPEKLKVIASNPRRYTGKPRVGTMREIARVCQYIQDNFSKVTVPFLTVHGTADGVTCPTSSKLLYEKASSADKSIKIYDGMYHSLIQGEPDENANLVLKDMREWIDERVERCGPKNC*	7	10497024	10499186	-1	aCL480Contig1|aC31205E08EF_c							Cs1g13520.1	98.1
Hydroxycinnamoyl CoA:shikimate/quinate hydroxycinnamoyltransferases
CitHCT1	Ciclev10010833m	ATGGAAATTCAGATAAAGGAGTCAACAACTGTAAGGCCTGCAGAGGAAACGCCCAAGCATTGCCTGCGGCTCACTAACTTGGATCTGTTTCTGGGAACAAGTCACGTCCCAACAGTGTACGTGTACCGGCGGCCAAATGACTGCACCAATTTCTTTGACGCTGGTGCACTTAAGGAGGCTTTGAGCCATGTTCTTGTGCCATTCTACCCCGTGGCTGGCAGATTCGGAAAGGATGAAAATGGCAGAATGGAGGTAAAGTGCAATGCTGAGGGAGTTCTGTTCGTGGTGGCCGAAGCAAGTTGTGTTATTGATGATTTGGGTGATTCTTTCACTCCAAGCTTCAAGCTTCAGCAGCTCGTCCCCAGAGTTGACACAAAGGATATCTCTTCTTATCCACTT…	MEIQIKESTTVRPAEETPKHCLRLTNLDLFLGTSHVPTVYVYRRPNDCTNFFDAGALKEALSHVLVPFYPVAGRFGKDENGRMEVKCNAEGVLFVVAEASCVIDDLGDSFTPSFKLQQLVPRVDTKDISSYPLLLLQVTHFKCGGVTLGVGFHHNLADGMSALHFINSWADVTRGIPIKNLPFIDRTVLGARVKKGDSPTFNHIEYGPPLSLRNDGAQLAHRPSNGSASSAASVATLKLSLDQINTLKAKVRKDQDQDECKSNIRYSTYEILAAHVWRCTSKARGLSDGQECKLYINVDGRSRLNPPLPSGYFGNVLFFNTPVALSGDIVSKPLIFTVKKIHEAIKQMDDKYLRSALAYLEHNDPTTIKHGAQAYASPGFKLNSWMRLPIYDADFGWGR…	1	26233403	26235119	-1								Cs4g04780.1	100
CitHCT2								aIC0AAA81CG08RM1_c	ATGGAAATTCATGTACAGAAGTCAACAATGATACGGCCTGCCCAAGAAACGCCCAAGCAACGCCTACGAAATTCTGACTTGGACTTGATTGCGCCATCAGGTTACGTCCCCCAGGTATACTTTTATCGACGGCCAAATTATACTTCCCCTAATTTCTTTGATGCTGGTTTGCTGAAGGAGGCTCTGAAAAAGATTCTTGTGCCGTTTCACCCCGTGGCTGGAAGGTTGCCCAGTGACGAAAGTGGTAGAACAGACATACTATGTAACGGAGTGGGGGTTTTGTTTGTGGAGGCGGAAACAAGTTGCGTTATTGATGATTTTGGTGACTTCGCGGAAGGCTCCAAGCTTTTGCCGTTGCTTCCAGCTTTTGATGACACGAAAGATAATTCTTCTTATCCA…	MEIHVQKSTMIRPAQETPKQRLRNSDLDLIAPSGYVPQVYFYRRPNYTSPNFFDAGLLKEALKKILVPFHPVAGRLPSDESGRTDILCNGVGVLFVEAETSCVIDDFGDFAEGSKLLPLLPAFDDTKDNSSYPLMMTQVTRFKCGGVCLATRFHHILADGASTYHFVNSWAEMTRGVPISIPPFFDRTVLDFGVPNSPRFHHIEYDPPPSMNTPTQNSESICTAILNLSFEQINILKEKSKENRGSTFEYTRLEVLAAHIWRCVCKARELSDDQASKLHFPTNGRSKLNPPLPSGYFGNAVFTTALIALSGNILSEPLNYTVERIHKALKQMNDKYLKSALAYLKQQPDPIVLRRGAHTYKCPNFNIVYLANMPIYDANFGWGPPMFSRVVNTYVEGIA…	1	28302752	28304162	1	Cs4g01930.1	82.2
CitHCT3								aCL4260Contig1	ATGGAAATTCATGTAAAAGAGTCAACGATGATACAACCTGCCCAAGATACTCCCAAGCATTGCCTACGGATGAGTGTCTTGGACCTGCTGATGCCGTCAGAACATATCCCTGCTGTGTATTTCTACCGCCGGCCAAATGGTTCTTCCAAATTCTTTGAAGCTGGTTTGCTGAAGGAGGCTTTGAGTAAAGTTCTTGTGGCGTTTTACCCACTGGCTGGAAGATTGACTAAGGATGAAAACGGCAGAACTGAGATACGATGCAACGGAGAGGGAGTTTTGTTTGTAGAGGCCCAAGCAAATTGTGTTATTGATGATTTTGGTGACTTTGAATCAAGCTTGAAGCTTATGCAGCTCGTTCCAACTGTTGATGACACAAAAGATGCTTCTTTCTATCCACTT…	MEIHVKESTMIQPAQDTPKHCLRMSVLDLLMPSEHIPAVYFYRRPNGSSKFFEAGLLKEALSKVLVAFYPLAGRLTKDENGRTEIRCNGEGVLFVEAQANCVIDDFGDFESSLKLMQLVPTVDDTKDASFYPLFMTQVTHFKCGGVCIGVMTYHTLIDGTATYHFIKSWAEMTRGIPVTIPPFFDRTILDVGVPKSPAFHHIEYDPPPSMNDPTQNPGTISTAILKLSLDQMKILKEKSKKDHESATKYTRFEIVAAHIWRCVCKARGLSVDQATKLDIPTSGRFKLNPKIPCEYWGNVVFSTTPIALAGDIQSESLNYSTERIHKALKLMDDKYMKSALAFLKQQPDLKVFMRDAKTFNCPNLVITKLADMPMYDVNFGWGPPFLTRPVNANMDGEVC…	4	2631075	2632486	1	Cs7g29080.1	100
Caffeoyl-CoA 3-O-methyltransferases
CitCCoAOMT1	Ciclev10009342m	ATGGCAGAAAAGGCAAAAAAAGCAGCAAGTAGCAAGGGATTGTTGCAAAGTGAAGAGTTATACAGGTATATCCTGGAGACGAGTGTTTACCCAAGAGAGCCAGAGCATCTGAAGGAGATAAGGGACGTTACTGCTGACCATCCAAGGGCCATGATGAGTACTGCACCAGATGCAGGTCAGTTAATGGCCATGCTCTTGAAGCTAGTGAATGCCAAGAAAACTATTGAAATTGGAGTTTTCACTGGATATTCTCTTCTCCTCACTGCACTTACAATTCCAGAGGATGGTCAGATTATGGCAATTGATGTGAATCGTGAGACATATGAAATAGGATTACCTGTCATTAAAAAGGCTGGAGTTGATCACAAGATAAACTTCATTGAGTCCGAGGCACTATCA…	MAEKAKKAASSKGLLQSEELYRYILETSVYPREPEHLKEIRDVTADHPRAMMSTAPDAGQLMAMLLKLVNAKKTIEIGVFTGYSLLLTALTIPEDGQIMAIDVNRETYEIGLPVIKKAGVDHKINFIESEALSVLDQLLKDSENEGSFDYAFVDADKVNYWNYHERLMKLLKVGGIAVYDNTLWGGTVAMSEEQVPDHLRGGRQATLDLNRSLADDPRIQLSHVPLGDGITICWRIF*	1	8633373	8634867	-1								Cs4g13430.1	97.9
CitCCoAOMT2	Ciclev10009335m	ATGACAGACAAAGCAAAACAAGCAGCAAGTAGCAAGGGATTGTTGCAAAGTGAAGATTTATACAGGTATATCCTTGAGACGAGTGTTTACCCAAGAGAGCCAGAGCCGCTGAACAAGATAAGAGATGTTACTGCTGACCATCCATGGGCCATGATGGGCACTGCACCGGATGCAGGTCAGTTAATGGCCATGCTCTTGAGGCTAGTGAATGCCAAGAAAACTATTGAAATTGGAGTTTTCACTGGATATTCTCTTCTCCTCACTGCACTCACAATTCCAGAGGATGGTCAGATTACAGCAATTGATGTGAATCGTGAAACATATGAAATAGGATTACCTATCATTAAAAAGGCTGGAGTTGATCACAAGATAAACTTCATTGAATCCGAGGCACTATCA…	MTDKAKQAASSKGLLQSEDLYRYILETSVYPREPEPLNKIRDVTADHPWAMMGTAPDAGQLMAMLLRLVNAKKTIEIGVFTGYSLLLTALTIPEDGQITAIDVNRETYEIGLPIIKKAGVDHKINFIESEALSVLDQLLKDSENEGSFDYAFVDADKDNYCNYHERLMKLLKVGGIAVYDNTLWGGTVAVPEEQVPDHFRGSSRQAILDLNRSLADDPRVQLSHVALGDGITICRRIF*	1	8670786	8673448	-1	aC31007H10EF_c							Cs4g13440.2	99.6
CitCCoAOMT3	Ciclev10021579m	ATGGCGAGCAGCTTGGTGGCGAATCGTTTTGCTTTTGTTTTACTGAAAACTGAAAAAACGGTTGCCAAATTCCATTCCTTTCCCTTATCTGAAAGATTGAGATTGAGACCCTGCAAGTTTAAGACTAAGAATCAGTTCACCACAAACTGCTGTGTTTCCTCTGCCCATGACGAAAAGTACAGCAACAAGCAAGTCATCAGTGTAACTCCTCCCCTTTACGACTACATCCTCCGAAATGTTCGTGAGCCCGAGATTTTGCGTCAACTGCGGGAAGAGACTGCTGGTATGCGTGGTAGCCAGATGCAGGTTTCGCCAGATCAAGCACAGCTACTTGCAATGCTTGTACAGATTCTCGGTGCACAACGGTGTATAGAAGTTGGTGTGTATACTGGATACTCA…	MASSLVANRFAFVLLKTEKTVAKFHSFPLSERLRLRPCKFKTKNQFTTNCCVSSAHDEKYSNKQVISVTPPLYDYILRNVREPEILRQLREETAGMRGSQMQVSPDQAQLLAMLVQILGAQRCIEVGVYTGYSSLAIALVLPESGCLVACERDARSLEVAKKYYERAGVSHKVKIKHGLAADSLKALILNGEASSYDFAFVDAEKRMYQEYFELLLQLIRVGGIIVIDNVLWHGKVADQMVNDAKTISIRNFNKNLMEDERVSISMVPIGDGMTICRKR*	3	47325509	47328073	1	aC01005H09SK_c|aIC0AAA44CE03RM1							orange1.1t00604.3	100
CitCCoAOMT4	Ciclev10012561m	ATGGCTGCGAATCGGGAAGGTCAGGAGGAAAACAAGGATCGTTACTTCAAAGCTGTACATGGGAACAAGACCTTTTTACAGAGTGAAAAACTTTATGAGTATATACTTGAAACCAGTGTATATCCAAGAGAACCACAATGCTTGAAGGAGATCCGCGAGTTGACGTACAAGCATCCATTGAGCCCCATGATGACTTCACCTGATGAAGCACAATTTTTTAGCATGCTACTCAAGCTTATCAATGCCAAGAATACCATGGAAATTGGCGTTTTCACTGGTTACTCTCTCTTAGCCACTGCCCTTGCCATTCCCGACGATGGCAAGATTCTGGCCCTGGACATCACCAAGGAACACTACGAGAAGGGTCTCCCTATAATTCAAAAAGCTGGTGTTGCTCAC…	MAANREGQEENKDRYFKAVHGNKTFLQSEKLYEYILETSVYPREPQCLKEIRELTYKHPLSPMMTSPDEAQFFSMLLKLINAKNTMEIGVFTGYSLLATALAIPDDGKILALDITKEHYEKGLPIIQKAGVAHKIDFREGPALPLLDQLIQHEKYHGTFDFVFVDADKDNYVNYHKRLIELVKVGGVIGYDNTLWGGSVVAPPDADLDEHILYLRDFVQELNKALAVDPRIEICQLSIADGVTLCRRIG*	6	11694662	11696169	-1								Cs1g22450.2	97.6
CitCCoAOMT5	Ciclev10026344m	ATGGCTGCGAATCGGGAAGGTCAGGAGGAAAACAAGGATCGTTACTACAAAACTCTACATGGGAACAAGACCCTTTTACAGAGTGAAAAACTTTATGAGTATATACTTGAAACCAGTGTATATCCAAGAGAACCACAATGCTTGAAGGAGATCCGCGAGTTGACGGACAAGCATCCATGGAGCGCCATGATGACTGCACCTGATGAAGCACAATTTTTGAGCATGCTACTCAAGCTTATCAATGCCAAGAATACCATGGAAATTGGCGTTTTCACTGGTTACTCTCTCCTAGCCACTGCCCTCGCCATTCCCGACGATGGCAAGATACTGGCCCTGGACATCACCAAGGAACACTACGAGAAGGGTCTCCCTATAATTCAAAAAGCTGGTGTTGCCCAC…	MAANREGQEENKDRYYKTLHGNKTLLQSEKLYEYILETSVYPREPQCLKEIRELTDKHPWSAMMTAPDEAQFLSMLLKLINAKNTMEIGVFTGYSLLATALAIPDDGKILALDITKEHYEKGLPIIQKAGVAHKIDFREGPALPLLDQLIQDEKYHGTFDFVFVDADKNNYINYHKRLIELVKVGGVIGYDNTLWGGSVVAQPDADLDELILGWRDSVQELNKALAVDPRIEICQLSIADGVTLCRRIG*	7	3362860	3364363	1	aCL18Contig10							Cs1g22450.2	98
CitCCoAOMT6	Ciclev10026347m	ATGGCTCCGAATCAAGAAGGGCAAGAAAACAAGGCTGCTGACTTCCTGCAATTATCCAAGACGAAGAATCTTTTGCAGAGTGATGAGCTTTACCAGTATATACTCGAAACTAGTGTATATCCAAGAGAGCATGAATGTTTGAAGGAGCTCCGCGAGTTGACAAAAAAGCATCCACGGAACCACATGTTGAGCACACCTGATGAAGCACAATTCCTGAGCATGCTACTCAAGCTTATCAACGCCAAGAATACCATGGAAATTGGTGTTTACACTGGTTACTCTCTCCTATACACTGCCCTTGCTATTCCCGACGACGGCAAGATATTGGCCATGGACATCAATAGAGAATACTACGAACTCGGTCTCCCCATAATTGAAAAGGCTGGTGTTGCTCATAAG…	MAPNQEGQENKAADFLQLSKTKNLLQSDELYQYILETSVYPREHECLKELRELTKKHPRNHMLSTPDEAQFLSMLLKLINAKNTMEIGVYTGYSLLYTALAIPDDGKILAMDINREYYELGLPIIEKAGVAHKIDFREGPALPLLDQMIQDEKYHGTFDFIFVDADKNNYINYHERIIALVKVGGVIGYDNTLWCGSVAVPPDSIMDERLRYFRDFVLEFNKAVALDPRIEICQLSIADGVTLCRRIS*	7	11203967	11205525	1								Cs1g12670.1	98.8
CitCCoAOMT7	Ciclev10029158m	ATGGCTTCCAACGCAGAAGATCAACAAAACCAACAAGGCGGACACAAGGAAGTTGGCCACAAGAGCCTGCTCCAATCCGATGCCCTCTACCAGTATATTCTTGAAACCAGTGTGTACCCAAGAGAGGCTGAATCAATGAAGGAGCTTAGAGAATTGACTGCCAAACATCCATGGAACGTTATGACAACGTCGGCAGACGAAGGGCAGTTCTTGAACATGCTGTTGAAGCTGGTCAATGCAAAGAACACAATGGAGATTGGAGTCTACACAGGCTACTCTCTTTTGGCCACTGCCCTTGCCCTTCCTGATGACGGAAAGATTTTGGCCATGGACATCAACAGAGAAAATTATGAATTGGGGCTGCCAGTTATCCAAAAAGCTGGTGTTGCTCACAAGATT…	MASNAEDQQNQQGGHKEVGHKSLLQSDALYQYILETSVYPREAESMKELRELTAKHPWNVMTTSADEGQFLNMLLKLVNAKNTMEIGVYTGYSLLATALALPDDGKILAMDINRENYELGLPVIQKAGVAHKIDFREGPALPVLDLLIQDEKNHGSFDFIFVDADKDNYLNYHKRLVELVKVGGVIGYDNTLWNGSVVAPPDAPLRKYVRYYRDFVLELNKALAADPRIEICMLPVGDGVTICRRIK*	8	2874895	2876912	-1	aCL139Contig2							Cs8g05410.1	99.2
Cinnamoyl-CoA reductases
CitCCR1	Ciclev10009021m	ATGGCTCATGAAGAAAAACCAACGACAGTTTGTGTTCTTGATGCTTCAACTTATGTTGGTTTTTGGATTCTCAAAAGACTCCTCAACAAAGGCTACTTTGTTCACGCAGCTATCCAAAAAAATGGAGAGAAGGCGATAGAGAAGCAGATTAAGGAAATGGAGAAAGTGGAGGAGAAACTGGTGTTGTTTAATGTCGATGTTTTGGACTACCAAAGCATTCTTGTTGCTTTAAAGGACTGTTGTGCTTTGTTCTGCTGTTTAGATAGCCCAGATGGCTATGATGATAAAATGGTGGATTTGGAAGTGAGAGGAGCAATCAATGTGGTGGAAGCATGTGCACAAACTGATAGTATACAGAAGCTAGTCTTCAGTTCTTCTTTAACTGCAGCCATCTGGAGA…	MAHEEKPTTVCVLDASTYVGFWILKRLLNKGYFVHAAIQKNGEKAIEKQIKEMEKVEEKLVLFNVDVLDYQSILVALKDCCALFCCLDSPDGYDDKMVDLEVRGAINVVEACAQTDSIQKLVFSSSLTAAIWREDICSEKDVDERSWSNQDFCRKLKLWYALAKTLSEQAAWALAMDRLLCMVSINAGLVLGPAVTQQNPQSTMFYLKGAAQMYENGVLAFVDVNFLADVHIRVFEDRSTSGRYFCFNQIVNTEEEAFKLAQSLSPLIPLPPRHECQGSEVYAERLKAKKLSKLVEALPVSLI*	1	27940263	27942612	1	aCL8119Contig1							Cs4g02410.1	100
CitCCR2	Ciclev10001844m	ATGAACGGGCCAGAAAAGGAAGTAGTTTGCGTGACTGGAGCCAACGGGTTCATCGGAACATGGGTGGTCCGAACCCTTCTAGAAAAAGGCTACACCAACATTCACGCTGCCATCTTTCCCGGCACTGACGCATCCCACTTGTTCAGCCTCCCAGGCGCCACCAAGCTCAACGTCCGTGTTTACGAGGCCAATATCTTAGACAACGAAGCAATTTCCAGGGCCATCGAGGGTTGCAAGGGGGTCTTCCATCTTGCCTCTCCTAACACCCTGGATGATCCCAAGGACCCCGAAAAGGAGCTGCTCATTCCTGCTGTTCAAGGCACCCTCAATGTCTTAGAGGCTGCCAAGAAGTTTGGTGTCAGGCGTGTGGTGCTCACCAGCTCCATTTCTTCCATTGTG…	MNGPEKEVVCVTGANGFIGTWVVRTLLEKGYTNIHAAIFPGTDASHLFSLPGATKLNVRVYEANILDNEAISRAIEGCKGVFHLASPNTLDDPKDPEKELLIPAVQGTLNVLEAAKKFGVRRVVLTSSISSIVPNPNWPQGKVIDETSWTDLDFCKSHKIWYSMSKTLAEKAAWEFAEKNGTDVVAIHPATSLGPFPQPYVNASGAVLQRLLQGSKDTQEHYWLGAVHVKDVAKAQVLLFETSAASGRYLCTNGIYQFAEFAEKVSKLFPEYPIHRFKGETQPGLVACENAAKRLISLGLDFTPVEETIREAVESLKAQGHLG*	5	165097	169348	1	aCL92Contig3							Cs3g01140.1	98.8
CitCCR3	Ciclev10001802m	ATGGCGTCAGAAGCCGAAAAGGAAGAAGAAACAGTGTGCGTGACCGGAGCCAACGGGTTCATCGGCACGTGGCTAGTCAAGACCCTTTTAGACAACAACTACACTTCCATAAACGCCACCGTTTTCCCCGGCTCCGACTCATCTCACTTGTTCGCCCTCCCTGGCGCCGGCGATGCCAACTTGCGAGTGTTCGAGGCCGACGTGTTGGACTCCGGCGCCGTCTCGAGGGCCGTTGAGGGATGCAAGGGGGTATTCCACGTGGCGTCTCCTTGTACGCTGGAGGATCCTGTGGACCCCGAGAAGGAGCTTATTCTGCCGGCTGTTCAAGGGACGCTTAATGTGCTTGAGGCTGCTAAGAGGTTTGGGGTGAGGCGCGTGGTGGTCACGAGCTCCATTTCG…	MASEAEKEEETVCVTGANGFIGTWLVKTLLDNNYTSINATVFPGSDSSHLFALPGAGDANLRVFEADVLDSGAVSRAVEGCKGVFHVASPCTLEDPVDPEKELILPAVQGTLNVLEAAKRFGVRRVVVTSSISAIVPNPGWKDKVFDETSWTDLEYCKSRKKWYPVSKTLAEKAAWEFAEKHGVDVVAIHPATCLGPLMQPYLNASCAVLQQLLQGSKDTQEYHWLGAVPVKDVAKAQVLLFESPAASGRYLCTNGIYQFGDFAERVSKLFPEFPVHRFDGETQPGLIPCKDAAKRLMDLGLVFTPVEDAVRETVESLKAKGFLGQHISQS*	5	284910	289108	-1	aCL3711Contig1							Cs3g01270.1	57
CitCCR4	Ciclev10001868m	ATGGCGTTAGAGAAAGAAAGAGTTTGTGTAACAGGTGCCGGCGGGTTTCTTGCCTCGTGGGTCGTCAAGCTTCTGCTCTCGAGAGACTATTTTGTTCATGGAACCGCAAGAGAACCCAGTGATGAGAAAAATGCTCGTTTGTATGAACTTGAGAAAGCATCTGAGAATCTGAAACTCTTCAAGGCTGACCTGCTGGATTATGATTCTGTTAAATCTGCCATTGTAGGATGCAATGGTGTCTTCCACATTGCTTGTCCTGCTCCATCCACCACTGTACCAAATCCTCAGATGGAACTGCTTGAGCCGGCTGTAAAGGGCACGCTCAATGTGGTTAAAGCATGTCTTGAGGCAAAAGTTAAGCGAGTTATTGTAGTCTCTTCTGGAGTTGCAGTAGGCCTG…	MALEKERVCVTGAGGFLASWVVKLLLSRDYFVHGTAREPSDEKNARLYELEKASENLKLFKADLLDYDSVKSAIVGCNGVFHIACPAPSTTVPNPQMELLEPAVKGTLNVVKACLEAKVKRVIVVSSGVAVGLNPRWPKGQIMDETCWSDKEYCRTTNNWYCLSKTEAESEALEFGKKTGLDVVTICPNLVLGPLLQSKVNTSSLVLIKLLKEGYESLENKLRMIVDVRDVAEALLLAYEKAEAEGRYICTAHMIRARDLVDKLKSLYPNYNYPKSFTEKEDEVMLTSEKLQKLGWSYRSLEETLVDSVESYKKVGILN*	5	32266176	32268352	1								Cs5g34850.1	100
CitCCR5	Ciclev10001855m	ATGAGCGGAGAAGATAAGGAGAGAGTGTGCGTGACTGGTGCTGGAGGCTACATAGCTTCATGGCTTGTCAAGTATCTGCTTTTGAAGGGCTACATGGTCCACGGAACTGTAAGAGACCCATGTGATGAAAAGAATGCTCATTTGAAGAAATTAGAAGGTGCTTCAGAGAATTTGCAGCTATTCAAAACAGACTTGCTTGACTATGAAGCTCTTTGTGCTGCTACGGCTGGCTGTACTGGGGTTTTCCACGTTGCATGCCCTGTTCCAGTTGGCAAAGTTCCTAATCCTGAGGTACAACTGATTGACCCAGCTGTTGTTGGGACAAAGAATGTTCTCAATTCATGTGTGAAGGCAAAAGTAAAGAGGGTTGTGGTAGTGTCATCTATTGGAGCTGTTATG…	MSGEDKERVCVTGAGGYIASWLVKYLLLKGYMVHGTVRDPCDEKNAHLKKLEGASENLQLFKTDLLDYEALCAATAGCTGVFHVACPVPVGKVPNPEVQLIDPAVVGTKNVLNSCVKAKVKRVVVVSSIGAVMLNPNWPKGQVMDEECWSDEEFCKATENYYCLAKTIAEIQALEYAKRGELDIVTVCPSIVIGPMLQPTINTSSLLLLGFLKDRTEPLEDEDRPLVDVRDVADAILLLYEKPEAKGRYICTSFTIRMQALAEKIKSMYPNYDYSKSFTKVDEELRLSSGKLQNLGWKYRPLEESIRDSVKNYEEAGILHKE*	5	32292686	32294775	1	aCL9088Contig1							Cs3g13090.1	100
CitCCR6	Ciclev10026007m	ATGACGGTAATTGATAGCAGCTCCCAAGTTTCTGGCCAAACTATTTGTGTCACCGGCGCCGGTGGCTTCATCGCTTCTTGGATGGTTAAACTTCTCCTTGAAAAAGGTTACAATGTTAAAGGCACCGTCAGGAACCCAGATGATCCAAAGAATGCTCATTTGAGGGAGCTTGAAGGAGCAAAAGAAAGATTAGTTTTATGCAAAGCTGATCTTCTTGATTATGAGAGTCTCAAAGAGGCCATTAATGGATGTGAGGGAGTTTTTCATACTGCTTCCCCTGTGACAGATGATCCAGAACAAATGGTGGAGCCCGCGGTGATCGGAACCAAGAACGTGATTGTTGCGGCGGCTGAGGCCAAGGTCCGGCGTGTTGTGTTCACGTCGTCGATCGGTGCAGTT…	MTVIDSSSQVSGQTICVTGAGGFIASWMVKLLLEKGYNVKGTVRNPDDPKNAHLRELEGAKERLVLCKADLLDYESLKEAINGCEGVFHTASPVTDDPEQMVEPAVIGTKNVIVAAAEAKVRRVVFTSSIGAVYMDPNRSPDDVVDESCWSDLEFCKNTKNWYCYGKAVAEKAAWEEAVARGVDLVVVNPVLVLGPLLQSTVNASIIHILKYLNGSAKTYANSVQAYVHVRDVALAHILVYETPSASGRYLCAESVLHRGEVVEILAKFFPEYPIPTKCSDEKNPRKKPYKFSNQKLKDLGLEFTPVKQCLYETVKSLQEKGHLPIPTQQQEESVKIQS*	7	14481484	14487002	-1	aCL84Contig1							orange1.1t02754.1	100
CitCCR7	Ciclev10026012m	ATGCCGATTGATAGCAGCACGCAAGTTTCCGGCCAAACTGTTTGTGTCACCGGCGCCGCCGGCTTCATCGCTTCTTGGATCGTTAAATTTCTCCTGGAAAAGGGTTACAGTGTTAAAGGAACCGTTAGGAATCCAGATGATCCAAAGAATGCTCATCTGAGAGAGCTTGAAGGAGCCAAAGAAAGATTAGCTTTATGCAAAGCTGATCTTCTTGATTATGAGAGTCTTAAAGAGGCATTTAATGGATGTGATGGAGTTTTTCATACTGCTTCCCCTGTGACAGATGATCCAGAAAAAATGTTGGAGCCCGCGGTGATTGGAACGAAGAACGTCATTGTTGCAGCGGCGGAGGCCAAAGTCCGACGTGTCGTATTCACGTCATCGATCGGTACAGTTTAC…	MPIDSSTQVSGQTVCVTGAAGFIASWIVKFLLEKGYSVKGTVRNPDDPKNAHLRELEGAKERLALCKADLLDYESLKEAFNGCDGVFHTASPVTDDPEKMLEPAVIGTKNVIVAAAEAKVRRVVFTSSIGTVYMDPNRSPDIVVDEHCWSDLEYCKNTKNWYCYAKTVAEKAAWEEAKARGLDLVVVNPMLVIGTLLQPTVNASIIHILKYLTGSVKTYANSVQGYVDVRDVALAHILVYETPSASGRYICADSDSIIHRGEVVEILAKFFPEYPIPTKCKDEKSPRAKPYKYSNQKIKDLGLKFTPVRQCLYDSVKSLQEKGHLPIPTQNQSNFNIN*	7	14498050	14501384	-1	aCL8388Contig1							orange1.1t02755.1	99.4
CitCCR8	Ciclev10028839m	ATGTCCAAAGAAGCTGAGGTGGTTTGCGTCACCGGCGGCAGCGGCTGCATCGGCTCCTGGCTGGTCCGTCTCCTTCTCGAACGCCGCTACACTGTTCACGCCACTGTCAAAAATCTCAGTGATGAAAGAGAAACAGCTCATCTCAAAGCGCTAGAAGGAGCTGACACGCGTCTCCGTCTCTTCCAAATCGACCTCCTCGATTACGACGCCATCGCCGCCGCGGTCACCGGCTGTACTGGTGTCTTCCACTTGGCCTCACCTTGCATTGTCGACAAAGTCGAAGATCCTCAGAACCAGCTTTTGAATCCCGCGGTTAAAGGAACCGTTAACGTACTCACCGCAGCTAAGGCACTGGGAGTGAAGCGCGTGGTCGTAACGTCATCGGTTTCCTCTATAACT…	MSKEAEVVCVTGGSGCIGSWLVRLLLERRYTVHATVKNLSDERETAHLKALEGADTRLRLFQIDLLDYDAIAAAVTGCTGVFHLASPCIVDKVEDPQNQLLNPAVKGTVNVLTAAKALGVKRVVVTSSVSSITPSPKWPADKVKDEDCWTDEEYCRQNEIWYPLSKTLAEKAAWEFAKEKGLDVVVVNPGTVMGPVIPPTLNASMLMLLRLLQGCTDTYGNFFMGSVHFKDVALAHILVYENPSACGRHLCVEAISHYGDFVAKVAELYPEYDIPRLPKDTQPGLLRTKDGAKKLMDLGLQFIPMDQIIKDSVESLKAKGFIS*	8	24721937	24724569	1	aCL66Contig1|aCL4037Contig2							Cs8g20610.1	99.4
Coniferaldehyde/sinapaldehyde dehydrogenase
CitREF1A	Ciclev10008077m	ATGGCGAGCCTTCGCAATGGAAGCACCAAGTCTTTATTCAAGTTGCGGGAGATCAAGTTCACAAAGCTGTTCATTGACGGAGAATTTGTTGATTCTGTTTCAGGGAGGACGTTTGAGACAATTGACCCTAGAACAGGTGAAGTCATAGCAAGAATTGCAGAAGGAGACAAGGAGGATATTGATCTTGCTGTCAAGGCTGCCCGTCGCGCCTTTGATCATGGTCCATGGCCCCGTTTTTCTGGAGCTGAGAGGAGACGGCTAATGTGGAAATTTGCGGACTTAATTGAGGAACATGTAGAGGAATTAGCAGCGTTAGATGCTCTTGATGCCGGCAAAGTATACTTGAGGGCCAAAACCGCGGAAATTCCTGGGGCTGCCGAATTCCTTCGTTTCTTTGCG…	MASLRNGSTKSLFKLREIKFTKLFIDGEFVDSVSGRTFETIDPRTGEVIARIAEGDKEDIDLAVKAARRAFDHGPWPRFSGAERRRLMWKFADLIEEHVEELAALDALDAGKVYLRAKTAEIPGAAEFLRFFAGAADKIHGEVLKMSSELQGYTLREPVGVVGHIIPWNFPTTMFFMKVSPALAAGCTMIVKPAEQTPLTALYYAHLAKLAGIPDGVLNVVPGFGPTAGAAICSHMDIDYVCFTGSTDVGRLVMQAAAASNLKQVSLELGGKSPLLIFDDADLDTAADVALLGNLYNKGEICVASSRVFVQEGIYDKFEKKLLEKAKAWLVGDPFDPTVRQGPQISERHFDRILSYIEHGKREGATLLTGGKPIGDKGYYIEPTIFTNVKEDMIIAKEE…	1	5619538	5622746	-1								Cs4g16680.1	83.8
CitREF1B	Ciclev10010514m	ATGGAGGGCAGTCTTAGCAATGGAAGCTGCAAGTCTTTATTCAAGATGCCGGAGATCAAGTTCACGAAGCTGTTCATTAACGGAGAATTTGTTGATTCTGTTTCAGGGAAAACGTTTGAAACAATTGATCCAAGGACAGGAGAAGCAATAGCAAGAATTGCTGAAGGAGACAAGGAGGATGTTGATCTTGCCGTCAAGGCAGCACGTCAGGCGTTTGATCACGGTCCATGGCCACGTTTTTCTGGAGCCGAAAGGAGAGGGATAATGTTGAAGTTTGCGGACTTAATTGAAGAACACGCAGAGGTATTAGCGGTGCTGGAAGCTCTTGATGCTGGCAAATTGCACAGTTGGGCCAAAATGGGCGACATTCCAGGAGCTGCTAATACCCTTCGTTACTAT…	MEGSLSNGSCKSLFKMPEIKFTKLFINGEFVDSVSGKTFETIDPRTGEAIARIAEGDKEDVDLAVKAARQAFDHGPWPRFSGAERRGIMLKFADLIEEHAEVLAVLEALDAGKLHSWAKMGDIPGAANTLRYYAGAADKIHGEVLKMSRALQGYTLREPIGVVGHIIPWNFPTTMFFMKVSPALAAGCTMIVKPAEQTPLIALYFAHLAKLAGVPDGVLNVVPGFGPTAGAAIASHMDIDKVSFTGSTDVGRQVMQAAATSNLKPVSLELGGKSPLLIFDDVDVNTAADMALLGILFNKEGIYDEFEKKLVEKAKAWVVGDPFDPAVRQGPQVDKKQFDRILSYIEHGKREGATLLTGGKPIGKKGYYIEPTIFTNVTEDMLIAKNEIFGPVMALMKFK…	1	5650217	5655629	-1								Cs4g16650.1	100
Caffeic acid O-methyltransferases
CitCOMT1	Ciclev10010561m	GTAAGATTGGCCAACACCCCTCTCTCCGCCTCCCAGATCTTGACACATATCCTCCCATCCGGCAGTGGGGATGCCGAGAACTTGCAACGTATCCTCCGCTTGCTCACCAGCTACGGCGTGTTCTCGGAGCATCGCGAATTTGGAGGCCAAATGAAGTACAGCATCACCGAGATTGGGAAATCCCTGGTTACTGATGCCGAGGGTCTATCGTACGCGCCCTACGTGCTCCAGCATCACCAGGACGCGCTTATGAGCATGTGGCCTTTAGTGCACGAGGCCGTTCTGGACCCAACTATTGAGCCACTTGTGAAAGTCCATGGCAAGCCGGCATATAGTTATTATGGGAAGATGCCTGAAATGAACGGCTTGATGCGAAAAGCCATGTCGGGAGTGTCTGTG…	VRLANTPLSASQILTHILPSGSGDAENLQRILRLLTSYGVFSEHREFGGQMKYSITEIGKSLVTDAEGLSYAPYVLQHHQDALMSMWPLVHEAVLDPTIEPLVKVHGKPAYSYYGKMPEMNGLMRKAMSGVSVPFMTSVLDGYNGFKGVKRLVEVGGSAGDCLRMILQKHRFICEGMNFDLPEVVGEAPSIPGVTHIGGDMFKSIPATDAIFMKWVLTTWTDDECKLIMENCYKALPTGGKLIACEPVLPDDSNESQRTRALLEGDIFFMTIYRAKGKHMTEQEFKQLGFSTGFPHLRLYRVLDY*	1	15231883	15232893	-1	C. sinensis	ATGGAAGATAACGAGTGTAGAGATGGCAGGAAGAAGGTAAGATTGGCCAACACCCCTCTCTCCGCCTCCCAGATCTTGACACATATCCTCCCATCCGGCAGTGGGGATGCCGAGAACTTGCAACGTATCCTCCGCTTGCTCACCAGCTACGGCGTGTTCTCGGAGCATCGCGAATTTGGAGGCCAAATGAAGTACAGCATCACCGAGATTGGGAAATCCCTGGTTACTGATGCCGAGGGTCTATCGTACGCGCCCTACGTGCTCCAGCATCACCAGGACGCGCTTATGAGCATGTGGCCTTTAGTGCACGAGGCCGTTCTGGACCCAACTATTGAGCCACTTGTGAAAGTCCATGGCAAGCCGGCATATAGTTATTATGGGAAGATGCCTGAAATGAAC…	MEDNECRDGRKKVRLANTPLSASQILTHILPSGSGDAENLQRILRLLTSYGVFSEHREFGGQMKYSITEIGKSLVTDAEGLSYAPYVLQHHQDALMSMWPLVHEAVLDPTIEPLVKVHGKPAYSYYGKMPEMNGLMRKAMSGVSVPFMTSVLDGYNGFKGVKRLVEVGGSAGDCLRMILQKHRFICEGMNFDLPEVVGEAPSIPGVTHIGGDMFKSIPATDAIFMKWVLTTWTDDECKLIMENCYKALPTGGKLIACEPVLPDDSNESQRTRALLEGDIFFMTIYRAKGKHMTEQEFKQLGFSTGFPHLRLYRVLDY*	1	15231883	15232929	-1	Cs7g25010.1	83.3
CitCOMT2	Ciclev10017683m	ATGGGTTCACTCCAAGATGATCACCAAGTCATGTTGAAACCAGCAAGGGATGAGCAAGACTTCTTGTTGGCCATGGAACTCGCTTCCGGCGCAGTACTTCCGATGACCATTAAATCTGCCACTGAGCTTGGTTTGTTGGAGATAATGGCGAAAGTTAGCCCAACTCAACTCTCGTCTTTAGAGATTGCCTCTCAGCTGCCCACAAATAACAAAAAAGCCCCAATAATACTGGACAGAATGCTACGCCTCCTAGCCAGTTACTCTTTTCTCACATGTAATCTTGTCTCGAACAAAGACGGAAGTGTTCAGAGATTATATGGCTTGACACCTGTTTCCAAATATTTTGTTCCAAATAAAGATGGAGTTTCTCTTGCTCCCACTCTGCTCATAATTCAGGAC…	MGSLQDDHQVMLKPARDEQDFLLAMELASGAVLPMTIKSATELGLLEIMAKVSPTQLSSLEIASQLPTNNKKAPIILDRMLRLLASYSFLTCNLVSNKDGSVQRLYGLTPVSKYFVPNKDGVSLAPTLLIIQDKISMDSWSCAKDALLEGSVPFMKAHNGMDGFAAAAKDERINNLFNQSMHNHTTIVMKEILEIYKGFEGLNQLVDVAGGLGANLKSVVSKYPQLRGINFDLPHVLKHAPSCPGVEHVGGDMFVEVPKGQAIFMKWILHDWSDEDCSKILKNCYEAIPESGKVILVESIVPEFPETDIVSKNIASLDVHLSNLFPGAKERTLAEFKALATEAGFTDIKVICRVYCYWVIEFYKTI*	2	4649837	4651313	-1	aCL4061Contig1							orange1.1t02085.1	96
CitCOMT3	Ciclev10020814m	ATGGGTTCAACCAGTTCAGAAACTCAAATAAGTCCAGCCCAAGGCTCGGATGAAGAGGCAAACCTCTTGGCCATGCAATTAACCAGTGCCTCAGTCTTGCCTATGGTTCTCAAATCAGCCATTGAGCTTGATCTTTTAGAGATCATCGCTAAAGCTGGGCCAGATGCTTTCATGTCTCCAAAAGACATAGCTTCTCAGCTGCCCACAAAGAACCCAGATGCCCATATCGTGCTTGATCGTATATTGCGCCTTCTGGCGAGCTATTCAGTCCTTAATTGCTCTTTGCGCAATCTCCCCGACGGCAAAGTTGAGAGGCTTTATGGCCTTGCCCCCGTTTGTAAATTCCTCACTAAAAATGAAGATGGTGTTACACTTTCCGATCTTTGTCTCATGAACCAA…	MGSTSSETQISPAQGSDEEANLLAMQLTSASVLPMVLKSAIELDLLEIIAKAGPDAFMSPKDIASQLPTKNPDAHIVLDRILRLLASYSVLNCSLRNLPDGKVERLYGLAPVCKFLTKNEDGVTLSDLCLMNQDKVLMESWYYLKDAVLEGGIPFNKAHGMNAFDYHGKDLRFNKIFNNGMSSHSTITMKKILENYKGFEGLNSVVDVGGGIGATLNMIISKYPSIKGINFDLPHVSSMLGGDMFVSVPKGDAIFIKWICHDWSDEHCVKFLKNCYEALPVNGKVIVAESILPVTPDTSLASKVVIHVDCIMLAHNPGGKERTEQEFRALAKAAGFQGFQVVSSAFNTYIMEFLKSA*	3	13749083	13753019	1	aCL3343Contig1							Cs5g16290.1	96.4
CitCOMT4	Ciclev10020874m	ATGGCTAATGAAGCGAGAGACGAAAACTTTGCATATGCCTTTGAAGTGGCGTTGGGTTCAGTGCTCCACATGACCATGAAAGCAGTAATTAATCTGGGACTTTTCGAGATCATAGCCAAAGCTGGTCCTGGAGCAAAGCTCTCAGCTTCAGAGATTGCCGCTCAGTTGCCCGCCACGAAGAACAAAGACGCACCCACGATGCTGGACCGGATACTCGGGCTTCTGGCTAGCTATGGCATTGTTGAATGCTCACTTGATGATGTCGATGGTTCTCACAGGCTATACGGTTTGAATGATGTTTCCAAATACTTTGTGCCTAATCAAGATGGTGTCTCATTAGGCCCTGTATTGGCCTTAATTCAGGACAAGGCCTTTCTCGACAGCTGGTCCGAACTGAAA…	MANEARDENFAYAFEVALGSVLHMTMKAVINLGLFEIIAKAGPGAKLSASEIAAQLPATKNKDAPTMLDRILGLLASYGIVECSLDDVDGSHRLYGLNDVSKYFVPNQDGVSLGPVLALIQDKAFLDSWSELKETIIEGGVPFDRVHGTNAFEYLGLDPRFNEVFSTAMSNHTTLVLQKILEAYKGFEHIKQLVDVGGSLGNTLKAITSKYPHIKGINFDLPHVIQHSPEYPGVKHVGGDMFQSVPNGDAILIKWILHDWSDEHCLKLLKNCYKSIPEDGKVIVVESVLPELPETSTHSKINSLADVLVMTQYPGGKERTKHEFTTLATEAGFSGIRFVCFFYNLWVMEFYK*	3	18517469	18520307	1								Cs5g16860.1	98.3
CitCOMT5	Ciclev10023568m	ATGGCTAATGAACAGAGAGACGAAAACTTTGCATATGCCTGCGAACTGGTGACGGGTTCAGTGCTCCACATGACCATGAAAGCAGTAATTAAGCTGGGACTTTTCGAGATCATAGCCAAAGCTGGTCCTGGAGCAAAGCTCTCAGCTTCAGAGATTGCCGCTCAGTTGCCCGCCACCAAGAACAAAGACGCACCCATGATGCTGGACCGGATACTCAGGCTTCTGGCTAGCTATGGTATTGTTCAATGCGCACTTGATGATGTCTATGGGTCACACAGACTATACGGTTTGAATGATGTCTGCAAATACTTTGTGTCTAATCAAGATGGTGTCTCATTAGGCCCTGTGTTGGCCTTAATTCAGGACAAGGCCTTTCTCGACAGCTGGTCCCAACTGAAA…	MANEQRDENFAYACELVTGSVLHMTMKAVIKLGLFEIIAKAGPGAKLSASEIAAQLPATKNKDAPMMLDRILRLLASYGIVQCALDDVYGSHRLYGLNDVCKYFVSNQDGVSLGPVLALIQDKAFLDSWSQLKETIIEGGVPFDRVHGTHAFEYLGLDPRFNEVFSTAMYNHTTLVIQKILEAYKGFEHIKQLVDVGGSLGNTLKAIISKYPHIKGINFDLPHVIQHAPEYPGVKHVGGDMFRSVPNGDAILIKWILHDWSDEHCLKLLKNCHKSIPEGGKVIVVESVLPELPETSTHSKINFLGDVLVMTQYPGGKERTKHEFMTLATGAGFSGVRFDCFFFNLWVMEFHK*	3	19958391	19960959	-1								Cs5g17970.1	99.1
CitCOMT6	Ciclev10020875m	ATGGCTAATGAAAGGAGAGACGAAAGCTTTGCATATGCCAATCAACTGGTGACGGCTTCAGTGCTACCCATGACAATGCAAGCAATAATTGGGCTGGGAGTTTTTGAGATCATAGCCAAAGCTGGTCCTGGAGCAAAGCTCCCAGCTTCAGAGATTGCCGCTCAGTTGCCCGCCACCAAGAATAAAGACGCACCTATGATGCTGGATCGGATGCTCAGGCTTCTGGCTAGCCATAGTGTTGTTGAATGCTCAATTGATGATGCTGATGATTCTCAGAGACTATACGGTTTGAATGACGTTTCCAACTACTTTGTGCCTAATAAAGATGGTGTCTCATTCGGCCCTGTGTTGGCCTTAATTCAGGACAAGGTCTTTATGGACAGCTGGTCCCAATTGAAA…	MANERRDESFAYANQLVTASVLPMTMQAIIGLGVFEIIAKAGPGAKLPASEIAAQLPATKNKDAPMMLDRMLRLLASHSVVECSIDDADDSQRLYGLNDVSNYFVPNKDGVSFGPVLALIQDKVFMDSWSQLKEAITEGGVPFDRVHGTHAFEYPGLDPRFNEVFNIAMYNYTNLVIQKILEAYKGFEHIQQLVDVGGCLGNTLKAITSKYPHIKGINFDLPHVIQHAPKYPGVEHVGGDMFQNVPKGDAIFMKWILHDWSDEHCLKLLKNCYKSIPEDGKVIVVEAILPELPETSTHSKINSQGDVLMMTQNPGGKERTKHEFTTLATEAGFSGIRFVCFFYNYWVIEFYK*	3	20132362	20135883	-1	aCL4936Contig1							Cs5g18050.1	99.1
CitCOMT7	Ciclev10020880m	ATGGCTAATGAAGAGAGAGACGAAAGCTTTGCATATGCCAATCAATTGGTGACGGGTTCAGTGCTCCCCATGACCATGCAAGCAGCAATTGAGCTGGGAGTTTTCAAGATCATAGCCAAAGCTGGTCCTGGAGCAAAGCTCTCAGCTTCAGAGATTGCAGCTCAGTTGCCTACCACCAAGAACAAAGACGCACCCATGATGTTGGACCGGATACTCAGGCTTCTGGCTAGCCATGGTGTTGTTGAATGCTCACTAGATGATATTGATGGTTCTCAGAGACTCTACGGTCAGAGTAATGTTTCCAGATACTTTGTGCCTAACGAAGATGGTGTCTCATTGGGCCCCTTAATGGCCTTAATTCAGGACAAGGTGTTTCTGGACAGCTGGTCCCAACTAAAA…	MANEERDESFAYANQLVTGSVLPMTMQAAIELGVFKIIAKAGPGAKLSASEIAAQLPTTKNKDAPMMLDRILRLLASHGVVECSLDDIDGSQRLYGQSNVSRYFVPNEDGVSLGPLMALIQDKVFLDSWSQLKEAIIEGGVPFDRVHGTHAFEYPRLDPRFNEVFNTAMYNLSTLVIQKILEAYNGFKHIKQLVDVGGSLGNTLKAITTKYSHVKGINFDLPHVIQHAPEYPGVEHAGGDMFQSVPKGDAILMKWILHDWSDEHCLKLLKNCYKSIPEDGKVIVVESILPDLPETSTLSKRNSQIDVLMMTQNPGGKERTKHEFMTLAAGAGFSGIRFECFTCNLWVMEFYK*	3	20391005	20394104	-1								orange1.1t04506.1	98.3
CitCOMT8	Ciclev10024037m	ATGGGTTCTGAAACTCAGATGACTCCAACCCAAATCTCAGATGAAGAAGCAAACCTCTTTGCCATGCAACTAACCAGTGCCTCAGTCTTGCCAATGGTTCTCAAATCAGCTATCGAGCTTGATCTTTTAGAGATCATTGCTAAAGCTGGCCCAGGTGCTTTCATGTCTCCAAAACAAATAGCTTCTCAGCTGCCCACGAAGAACCCAGATGCCCATATCATGCTTGATCGCATATTGCGTCTTTTGGCTAGCTACTCAGTTCTTAACTGCTCTGTGCACACTCTCCCAGGTGGCGGAGTTGAGAGGCTTTATGGCCTCGCACCCGTTTGCAAATTCCTTACCAAAAATGGTGATGGTGTTTCACTTTCCAACCTTTGTCTCATGAATCAAGACAAGATT…	MGSETQMTPTQISDEEANLFAMQLTSASVLPMVLKSAIELDLLEIIAKAGPGAFMSPKQIASQLPTKNPDAHIMLDRILRLLASYSVLNCSVHTLPGGGVERLYGLAPVCKFLTKNGDGVSLSNLCLMNQDKILMESWYHLKDAVLEGGIPFNMAYGMTSFEYFGKDQRFNKIFNNGMFSHSTITLKKFLENYKGFEGLKSVVDVGGGIGASVNMIISKYPSIKGINFDLPHVIQDGPAYPGIEHVGGDMFVSIPKADVIFMKWICHNWSEEACVKILKNCYEALPENGKVIVAECILPVLPDPSLASKQVIHIDCIMLAHTTGGREMTEQDFKTLAKVAGFQGFKVVCSAFSTYIMEFLKKP*	3	31211929	31215125	1								Cs5g13560.1	99.2
CitCOMT9	Ciclev10020761m	ATGGGTACTGAAACTCAGATGACTCCAACTCAAATCTCAGATGAAGAAGCAAAACTCTTTGCCATGCAACTAACCAGTGCCTCAGTTTTGCCAATGGTTCTCAAATCAGCTATCGAGCTTGATCTTTTAGAGCTCATTGCTAAAGCTGGCCCAGGTGCTTTCATGTCTCCAAAACAAATAGCTTCTCAGCTGCCCACAAAGAACCCAGATGCCCATATCCTGCTCGATCGCATATTGCGTCTTTTGGCTAGCTTCTCAGTTCTTAACTGCTCTTTGCACACTCTCCCTGGTGGCGGAGTTGAGAGGCTTTATGGCCTTGCACCCGTCTGTAAATTCCTTACCCAAAAAGAAGATGGTGTTTCACTTTCCAACCTTTGTCTCGTGAGTCAAGACAAGATT…	MGTETQMTPTQISDEEAKLFAMQLTSASVLPMVLKSAIELDLLELIAKAGPGAFMSPKQIASQLPTKNPDAHILLDRILRLLASFSVLNCSLHTLPGGGVERLYGLAPVCKFLTQKEDGVSLSNLCLVSQDKIVMESWYHLKDAVREGGIPFNMAYGMNTYEYHGKDPRYNKIFNNGMFSHATITMKKFLENYKGFEGLKSVVDVGGGIGASLNIIISKYPSIKGINFDLPHVIQDAPAYPGIEHVAGDMFVSIPKGDAIFMKWICHNWSEEACVKILKNCYEALPEDGKVIVADCILPVLPDTSLASKHVIQLDCIMLTTTSGGREMTEQDFKTLAKAAGFQGFKVVCSAFNTYIMEFLKKP*	3	31300331	31302670	1	aC31803B07EF_c							Cs5g13580.1	74.4
CitCOMT10	Ciclev10033543m	ATGGAAGATAACGAGTGCAGAGATGGCAGGAAGAAGGTAAGACTGGCCAACACCCCTCTCTCCGCCTCCCAAATCTTGACACGTATCCTCCCATCCGGCGGTGGGGACGCCGAGAACTTGCAACGTATCCTCCGCTTGCTCACCAGCTACGGCGTGTTCTCAGAGCATCGCGAATTTGGAGGCAAAAGGATGTACAGCCTCACCGAGATTGGGAAATCCCTCGTTACTGATGTCGAGGGTCTATCGTACGCGCCCTACGTGCTCCAACATCACCAGGATGCGCTTATGAGCATGTGGCCTTTGGTGCACAAGGCCATTCTGGACCCAACTATTGAGCCATTTCTGAAAGTCCATGGCGAGCCGGCATATAGTTATTATGGGAAGATACCTGAAATGAAC…	MEDNECRDGRKKVRLANTPLSASQILTRILPSGGGDAENLQRILRLLTSYGVFSEHREFGGKRMYSLTEIGKSLVTDVEGLSYAPYVLQHHQDALMSMWPLVHKAILDPTIEPFLKVHGEPAYSYYGKIPEMNGLMRKAMSGVSVPFMTSVLEGYNGFKGVKRLVDVGGSAGDCLRMILQKHRFICEGINFDLPEVVAEAPSIPGVTHIGGDMFKSIPAADAIFMKWVLTTWTDDECKLIMENCYKALPAGGKLIACEPVLPDDSNESQRTRALLEGDIFVMTIYRAKGNHRTEQEFKQLGFFAGFPHLRLYRVLDY*	4	6025715	6026668	1								Cs7g25540.1	65
CitCOMT11	Ciclev10001661m	ATGGGTTCTATAGTTGATGGAGAAAGAGACCAAAGCTTTGCATATGCTAATCAATTGGCGATGGGTACAGTGCTACCCATGGCCATGCAAGCGGTGTATGAGCTAGGCATTTTCCAGATCATAGACAAAGCTGGTCCTGGTGCAAAGCTCTCTGCTTCAGATATTGCAGCCCAGTTGCCCACCAAGAACAAAGACGCACCCACGATGCTGGATCGGATTCTCAGGCTTCTGGCTAGCTACAGTGTTGTTGAGTGCTCACTTGATGGTTCTGGTGCCCGGAGACGATATAGTTTAAATTCTGTCTCCAAATACTATGTGCCTAACAAAGATGGCGTCTCACTAGGCCCCGCATTGCAAATGATTCAGGACAAGGTCTTTCTGGAGAGCTGGTCCCATCTC…	MGSIVDGERDQSFAYANQLAMGTVLPMAMQAVYELGIFQIIDKAGPGAKLSASDIAAQLPTKNKDAPTMLDRILRLLASYSVVECSLDGSGARRRYSLNSVSKYYVPNKDGVSLGPALQMIQDKVFLESWSHLKDAILEGGIPFNRAHGMHAFEYGRVDPRFNKHFNTAMYNHTSLIMSNILESYKGFANIKQLVDVGGNLGVTLQAITSKYPYIKGINFDQPHVIEHAPLHPHIEHVAGDMFQSVPKGDAIFLKWILHDWDDEHCLKLLKNCYKSVPEDGKVIVVELMLPEVPNTSIESKSNSHIDVLMMTQNPGGKERTKHEFMTLATGAGFSGIRFDLVTGNFWVMEFYK*	5	7157125	7159270	1								orange1.1t04194.2	92.1
CitCOMT12	Ciclev10001555m	ATGGCTAATTCCAAGCCCAAGAGGAATAGCTCTACCTCCGTGGACCAAGAAGAAGTTGGAAAACTTGCCGTCCGACTAGCTAATGCGGCCGTTCTTCCGATGGTGCTAAAATCAGCTATCGAGCTCAATGTCATTGACATCATCTCTGCCGCCTCTGCTGCAGAAGATGGCCATGGTGAGTTACTCTCACCTTCTAAGATTGCAGCTAGGCTACCTACCGAGAATCCAGACGCACCGTTTCTGCTCGACCGGATGTTAAGTCTTTTGGCGAGCTATGACATACTCAGATGCTCGCTTCAGACGGGAGATAATGGACAAGTGGAGAGAGTTTACGGCGCCGCGCCGATTTGCAAGTTCCTGATTAAGAATCAAGATGACGATGATGGGTCTGTTGCCCCG…	MANSKPKRNSSTSVDQEEVGKLAVRLANAAVLPMVLKSAIELNVIDIISAASAAEDGHGELLSPSKIAARLPTENPDAPFLLDRMLSLLASYDILRCSLQTGDNGQVERVYGAAPICKFLIKNQDDDDGSVAPLFLLHHDKVFMESWYHLKDVILEGGIPFRRAYGMTQFEYLGTDPRFNGVFNEAMSNHSALVMNKILDVYRGFDGLKVLVDVGGGIGVTLGMITSRYPCIKGISFDLPHVLANAPSFPGVEHVGGDMFENVPRGDAIFLKWMLHGWTDEHCLKLLKNCWEALPENGKVIIVESILPLVPENQASSHIVFEQDLFMLAQTTGGRERSKKEYEALAKNSGFSGLEIVCCAYNSWVMEFHK*	5	38209867	38211789	1	aC08039B05SK_c							Cs3g20650.1	96.8
CitCOMT13	Ciclev10013655m	ATGGAAGATAACGAGTGCAGAGATGGCGGGAAGAAGGTAAGACTGGCCATAATGGAGCTGGCCAACATGATAAGTGTTCCCATGTCTCTAACCGCTGCCATCCGTCTCCACGTACCGGATGCCATCTGGCAAGGTGGGGCCAATACCCCTCTCTCCGCCTCCCAGATCTTGACACGTATCCTCCCATCCGGCGGTGGGGACGCCGAGAACTTGCAACGTATCCTCCGCTTGCTCACCAGCTACGGCGTGTTCTCGGAGCATCGCGAGTTTGGAGGCGAAAGGAAGTACAGCCTCACCGAGATCGGGAAATCCCTCGTTACTGATGCCGAGGGTCTATCGTACGCGCCCTACGTGCTCCAGCATCACCAGGACGCGCTTATGAGCGCGTGGCCTTTGGTG…	MEDNECRDGGKKVRLAIMELANMISVPMSLTAAIRLHVPDAIWQGGANTPLSASQILTRILPSGGGDAENLQRILRLLTSYGVFSEHREFGGERKYSLTEIGKSLVTDAEGLSYAPYVLQHHQDALMSAWPLVHEAVLDPTIEPFVKVHGEPAYSYYGKKPEMNGLMRKAMSGVSVPFMTSVLDGYDGFKGVKRLVDVGGSAGDCLRMILQKHPFICEGINFDLPEVVAEAPSIPGVTHIGGDMFKSIPAADAIFMKVHHF*	6	6317433	6318565	-1	aCL94Contig2							orange1.1t01084.1	76.6
CitCOMT14	Ciclev10029876m	ATGGAAGATAACGAGTGCAGAGATGGCAGGAAGAAGGTAAGACTGGCCAACACCCCTCTCTCCGTCTCCCAGATCTTGACATGTATCCTCCCATCCGGAGGTGGGGACGCCGAGAACTTGCAATGTATCCTCCGCTTGCTCACCAGTTACGGCGTGTTCTCGGAGCATCGCGAATTTAGAGGCGAAAGGAAGTACAGCCTCACCGAGATTGGAAAATCCCTCGTTACTGATGCCGAGGGTCTATCGTACGCGCCCTACGTGCTCCAACATCACCAGGATGCGTTTATGAGCGCGTGGCCTTTGGTGCACGAGGCCGTTCTGGACCCAACTATTGAGCCATTTGTGAAAGTCCATGGCGAGCCGGCATATAGTTATTATGGGAAGATGCCTGAAATGAAC…	MEDNECRDGRKKVRLANTPLSVSQILTCILPSGGGDAENLQCILRLLTSYGVFSEHREFRGERKYSLTEIGKSLVTDAEGLSYAPYVLQHHQDAFMSAWPLVHEAVLDPTIEPFVKVHGEPAYSYYGKMPEMNGLMRRAISGVSVPFMTSVLDSYNGFKGVKRLVDVGGSAGDCLRMILQKHHFICEGINFDLPEVVGEAPSIPGVTHIGGDMFNSIPAANAIFMKWVLATWTDDECKLIMENCYKALLAGGKLIACEPVLLDDSNESQRTRALLEGDIFVMTIYRAKGKHRTE*	8	15558738	15559622	1								Cs7g25540.1	58.1
CitCOMT15	Ciclev10005230m	ATGGGTACTGAAACTCGGATGACTCCAACTCAAATCTCAGATGAAGAAGCAAACCTCTTTGCCATGCAACTAACCAGTGCCTCAGTTTTGCCAATGGTTCTCAAATCAGCCATCGAGCTTGATCTTTTAGAGGTCATTGCTAAAGCTGGCCCAGGTGCTTTCATGTCTCCAAAACAAATAGCTTCTCAGCTGCCCACAAAGAACTCAGATGCCCATATCCTGCTCGATCGCATATTGCGTCTTTTAGCTAGCTACTCAGTTCTTAACTGCTCTTTGCACACTCTCCCTGATGGCGGAGTTGAGAGGCTTTATGGCCTTGCACCCGTCTGTAAATTCCTTACCAAAAATGAAGATGGTGTTTCACTTTCCGACATTTGTCTCCTGTGTCAAGACAAGATT…	MGTETRMTPTQISDEEANLFAMQLTSASVLPMVLKSAIELDLLEVIAKAGPGAFMSPKQIASQLPTKNSDAHILLDRILRLLASYSVLNCSLHTLPDGGVERLYGLAPVCKFLTKNEDGVSLSDICLLCQDKIVMESWYHLKDAILEGGIPFNMAYGMNAFDYHGKDLRLNKIFNNGMFSHSTITMKKFLENYKGFEGLQSVVDVGGGIGASLDMIISKYPSIKGINFDLPHVIQDAPAYPGIEHVGGDMFVSIPKAEAIFMKWICHNWSEEACVKILKNCYEALPEDGKVIVVDCILPVLPDTSLASKQVIQLDCFMLAYTIGGREMTEQDFKTLAKAAGFQGFKVVCSAFNTYIMEFLKNP*	9	15450394	15452730	1								Cs5g13560.1	96.1
Ferulate-5-hydroxylase
CitF5H1	Ciclev10025382m	ATGGATTCTCTTATTCAAGCTTTGCAACCTTTACCGACGGCCGTTTTCTTCATAATTCCTTTACTGTTCTTGCTTGGCGTTATCGCTCGTCTTCGCCGGAGGTTACCTTATCCCCCAGGGCCAAGAGGGTTACCAATTATCGGCAACATGCATATGATGGATCAGCTAACACATCGTGGACTTGCAAAACTCGGTAAAAAATATGGCGGTTTGTGTCATCTCCGCATGGGGTTCGTGCACATGGTGGCTGTTTCAAATCCTGAGATGGCTCGTCAGGTTTTGCAAGTGCAAGATAATATTTTCTCTAACCGACCGGCCACTATAGCCATCAGCTACCTCACCTATGATAGAGCCGATATGGCTTTTGCTAACTACGGCCCGTTTTGGCGACAGATGCGT…	MDSLIQALQPLPTAVFFIIPLLFLLGVIARLRRRLPYPPGPRGLPIIGNMHMMDQLTHRGLAKLGKKYGGLCHLRMGFVHMVAVSNPEMARQVLQVQDNIFSNRPATIAISYLTYDRADMAFANYGPFWRQMRKLCVMKLFSRKRAESWESVRDEVETLVKSAAANTGKAVNVGELIFTLTSNITYRAAFGLSSNEGQDEFIRILQEFSKLFGAFNIADFIPWLNWIDPQGLYNRLPKARQALDRFIDNIIDDHMRKRDKSTGGSDDADSDMVDDLLAFYSDEAKVNESEDLNNSIKLTRDNIKAIIMDVMFGGTETVASAIEWALTELMRSPEDLKRVQQELADVVGLDRRVEESDFDKLTYLKCTLKETLRLHPPIPLLLHETAEEAEVGGYYIPAK…	7	1450748	1452915	-1	aCL1203Contig1							Cs1g24950	100
CitF5H2	Ciclev10028122m	ATGAGTATTGGCTCGGCATATATTTCTGGTCGGCCTCATCTCTTAACCAAATTAATTCGACTTACAGCCATGGATTCGCTGCTTCAAACTCTTCAATCATCACCAATCTTCTTCATCATTCTTCCTCTCTTACTGGCTTTCGTTCTCTTCTCATTAACAACCTTACGTAAAAAACTCCCATACCCTCCAGGCCCAAAAGGGTATCCGATCATCGGCAACATGGCCATGATGGACCAACTGACTCACCGCGGCCTCGCAGACCTTGCCAAGAAATACGGCGGCCTCCTCCATCTCCAAATGGGAGCAATTCATGTCGTCGCCGTATCGACGCCGGACATGGCTAAAGAAGTTCTTCAGGCTCAAGATCTCGTCTTCGCAAACCGGCCAGCAAACGTGGCC…	MSIGSAYISGRPHLLTKLIRLTAMDSLLQTLQSSPIFFIILPLLLAFVLFSLTTLRKKLPYPPGPKGYPIIGNMAMMDQLTHRGLADLAKKYGGLLHLQMGAIHVVAVSTPDMAKEVLQAQDLVFANRPANVAITYLTYDRADMAFANYGPFWRQMRKICVIKLFSRRREESWASVREEVDSTLQTVMNTTGSKVNIGELVFALTRNITYRAAFGSFSHDGQDEFVKILQEFSKLFGAFNIADFFPWMGWINARGFYKRMARARESLDGFIDSIIDEHMKKKKKKNVRDEEGKINYNDGEAEAEADTDMVDELMAFYSEEEGVAAKGDGDDLQSAKLTRDHIKAIIMDVMFGGTETVASAIEWAMAELMKSPHDLKKVQEELADKVGLTRILHDSDLKQ…	8	6535912	6540574	1	aIC0AAA58BG11RM1_c							orange1.1g009497m	95.7
Cinnamyl alcohol dehydrogenases
CitCAD1	Ciclev10020847m	ATGACCTCTGAAACTGCAAGCAAGGACTGCCTTGGGTGGGCAGCCAGAGATCCTTCAGGAGTTTTGTCACCATACAGCTTCAACCGCAGGGCTGTTGGGAGTGATGATGTTTCAATAACCATTACGCATTGTGGAGTTTGTTATGCGGATGTTATTTGGACTAGGAATAAACATGGAGACTCAAAGTATCCTTTGGTGCCTGGACATGAGATTGTTGGAATTGTGAAAGAGGTTGGTCACAATGTTAGCCGCTTCAAAGTTGGTGACCATGTTGGCGTGGGAACTTATGTCAACTCATGCAGAGATTGTGAGTATTGTAATGATGGGCTAGAAGTTCATTGTGCTCGGTCAGTTTACACTTTTAATGCCATTGATGCGGATGGTACTATCACAAAAGGA…	MTSETASKDCLGWAARDPSGVLSPYSFNRRAVGSDDVSITITHCGVCYADVIWTRNKHGDSKYPLVPGHEIVGIVKEVGHNVSRFKVGDHVGVGTYVNSCRDCEYCNDGLEVHCARSVYTFNAIDADGTITKGGYSSYIVVHERYCYKIANDYPLALAAPLLCAGITVYTPMMRHKMNQPGKSLGVIGLGGLGHMAVKFGKAFGLNVTVLSTSTSKKEEALSLLGADKFVVSSDLEQMKALGKSLDFIIDTASGDHPFDAYMSLLKVAGVYVLVGFPSKVKFSPASLNIGAKTVSGSVTGGTKDTQEMLEYCAAHKIYPQIETIPIENVNEALERLIKRDVKYRFVIDIQNSLK*	3	137600	141631	1	aCL3710Contig1							Cs5g01110.1	100
CitCAD2	Ciclev10001618m	ATGGCTCAAACAACTCCAAATCACACACAGAGCGTTGTTGGTTGGGCCGCTCATGATCCCTCCGGCAAGATTACTCCTTATATCTTCAAGCGAAGGGAGAATGGTGTGAATGACGTGACCATAAAAATCTTGTACTGTGGAATTTGCCACACCGACATCCATCATATCAAAAACGACTGGGGAATCACCATGTATCCCGTTGTTCCAGGACATGAAATAACTGGGATAATAACCAAGGTCGGAAGCAATGTGAAGAATTTCAAGGTGGGAGATAGGGCTGCAGTTGGGTGCTTGGCGGCGGCGTGTATGGAGTGTGAGTTCTGCAAAGACTCGCAAGAAAACTACTGTGACAAAATCCAGTTCACCTATAATGGCATTTTTTGGGATGGGAGCATCACT…	MAQTTPNHTQSVVGWAAHDPSGKITPYIFKRRENGVNDVTIKILYCGICHTDIHHIKNDWGITMYPVVPGHEITGIITKVGSNVKNFKVGDRAAVGCLAAACMECEFCKDSQENYCDKIQFTYNGIFWDGSITYGGYSEMLVADYRFVVHVPENIAMDAAAPLLCAGITVFCPMKDNNLIDSPAKKRIGIVGLGGLGHVAVKFGKAFGHHVTVISTSPSKEKEAKELLGADEFILSTNAMQMQAGKRTLDFILDTVSAKHSLGPILELLEVNGTLSVVGAPEAPFELPSFPLIFGKRSVKGSMTGGMRETQEMMNVCGKYNITCNIEVIKPDQINEALDRLARNDVRYRFVIDIAGGARE*	5	42228572	42230813	1	aIC0AAA45AD07RM1_c							Cs3g26570.1	100
CitCAD3	Ciclev10025755m	ATGTTGATTAGAAACATATGTACACACATTAATATTCATATGAAACAAAAACAAAAACAGGTACTTTCACTCGTCTCATCACGTCATTCAAACCACTATAATAATGATAACATTGCCGTTCTCTCATCCAAAATGGCAAAATCACGAGAAGAAGAACATCCAGTAAAGGCCTTTGGGTGGGCAGCCCGAGACAGCTCCGGCCATCTCTCCCCATTCAAATTCTCCAGAAGGGAAACGGGTGATGAGGATGTGAGGCTGAAGGTATTGTATTGTGGGATCTGCCATACTGATCTCTCCAACATCAAGAATGAATGGGGCTTCTCTCTCTTCCCTATGGTTCCTGGGCATGAAATTGCAGGGGAAGTGACAGAAGTTGGTAGCAAAGTAAGAAAGGTTAAA…	MLIRNICTHINIHMKQKQKQVLSLVSSRHSNHYNNDNIAVLSSKMAKSREEEHPVKAFGWAARDSSGHLSPFKFSRRETGDEDVRLKVLYCGICHTDLSNIKNEWGFSLFPMVPGHEIAGEVTEVGSKVRKVKVGDKVGVGCMVGACHSCESCANDLENYCPKMILTYSSINTDGTITYGGYSDHMVANERYIVRFPDSMPLDAAAPLLCAGITVYSPLKYFGLAEQGKHVGIVGLGGLGHVAVKFAKAFGAKVTVISTSPSKKTEVLEHLGADSFLNSRDPDQLQGAMGTLDGIIDTVSAVHPILPLVGLLKSQGKLVLVGAPDKPLELPVISLIMGRKTVSGSSTGGMKETQEMIDFAAKHNITADIEVISMDYVNTAMERLAKADVRYRFVIDIAN…	7	4984938	4988172	1	aCL33Contig1							Cs1g20600.2	98.3
CitCAD4	Ciclev10026185m	ATGGTTCCTGGGCATGAAATTGCAGGGGAAGTGACAGAAGTTGGCAGCAAAGTAAGAAAGGTTAAAGTGGGAGATAAAGTTGGAGTTGGATGCATGGTTGGTGCATGCCACAGCTGCGAGAGCTGTGCCAATGACCTTGAAAATTACTGTCCGAAAGTGATACCCACCTACACTTCCATTAACACTGACGGAACAATCACATACGGAGGCTACTCTGATCAAATGGTTGCCAATGAGCGCTACATTGTTCGATTCCCTGATAGCATGCCCCTTGATGCTGCTGCTCCCCTGCTTTGCGCCGGGATTACCGTGTACAGTCCATTGAAATACTTTGAACTAGCAGAACATGGAAAGCATGTAGGCATCGTTGGCCTTGGTGGGCTTGGTCATGTCGCTGTC…	MVPGHEIAGEVTEVGSKVRKVKVGDKVGVGCMVGACHSCESCANDLENYCPKVIPTYTSINTDGTITYGGYSDQMVANERYIVRFPDSMPLDAAAPLLCAGITVYSPLKYFELAEHGKHVGIVGLGGLGHVAVKFAKAFGAKVTVISTSPSKKTEALEHLGADSFLNSRDPDQLQGAMGTLDGIIDTVSAVHPILPFVGLLKSQGKLVLVGVPNKPLELPVISLIMGRKTVSGSSIGGMKETQEMIDFAAKHNITADIEVISMDYVNTAMERLAKADVRYRFVIDIANTLAATKP*	7	4990749	4993217	1								Cs1g20590.3	99.7
CitCAD5	Ciclev10025933m	ATGGGGCAAGCACCGGAGCAAGAGCACCCTAAGAACGCCTTTGGATGGGCTGCCAGGGACACTTCTGGCGTTCTCTCCCCCTTTCACTTCTCCAGAAGAGCAACGGGAGAGAAGGATGTGACATTCAAAGTAACTCACTGTGGGATATGCCATTCAGATCTTCACTTGATCAAAAATGAATGGGGCAATGCCATTTACCCAATCGTCCCCGGACATGAGATTGTGGGCGTAGTGACAGAGGTCGGAAGCAAAGTGAGTAAATTCAAAGTCGGAGACAAAGTGGGAGTAGGATGCATGGTGGGATCATGCCGCTCTTGTGATAGCTGCGCCATTGATCTTGAGAACTACTGCCCCAAAGTTATAATGACCTATGCCAGCAAGTACCATGATGGAACCATC…	MGQAPEQEHPKNAFGWAARDTSGVLSPFHFSRRATGEKDVTFKVTHCGICHSDLHLIKNEWGNAIYPIVPGHEIVGVVTEVGSKVSKFKVGDKVGVGCMVGSCRSCDSCAIDLENYCPKVIMTYASKYHDGTITYGGYSDTMVADEHFVVRIPEGAPLDATAPLLCAGITVYSPLRFYGLDKPGMHVGVVGLGGLGHVAVKFAKAMGVKVTVISTSPSKKSEAVERLGADSFLVSRDQDEMQAAMGTMDGIIDTVSAVHPLMPLIGLLKSQGKLVLLGAPEKPLELPAFPLLTGRKIVGGSLIGGLKETQEMIDFAAKHNIRADIEVIPADYVNTAMERLAKADVRYRFVIDVANTMKSTP*	7	4997089	4999784	1	aCL85Contig3|aCL85Contig1							Cs1g20580.1	98.3
CitCAD6	Ciclev10025939m	ATGGCAAAATCACCAGAAACAGAGCAGCCTCAAAAGGCCATTGGTTGGGCTGCCAGAGACAACACTGGAACCTTCTCCCCATTCCATTTCTCCAGAAGAGAAACTGGTGCTGATGATGTAACTATTAAGATCCTCTTTTGTGGGATTTGCCACTCGGACTTGCATTGTGCCAGAAATGAATGGGGTGTCACCAATTACCCAATTGTTCCCGGGCATGAAATTGTTGGTACTGTGACAAAAGTTGGAAATAACGTGTCAAAATTCAAAGAGGGTGACAAGGTTGGAGTTGGGGTCTTGGTAGCCTCCTGCCAAAAATGTGAAAGCTGTCAGCAGGGCTTGGAGAATTACTGTCCTAATATGATACTTACATATAACTCCATTGATCGTGATGGAACAAAA…	MAKSPETEQPQKAIGWAARDNTGTFSPFHFSRRETGADDVTIKILFCGICHSDLHCARNEWGVTNYPIVPGHEIVGTVTKVGNNVSKFKEGDKVGVGVLVASCQKCESCQQGLENYCPNMILTYNSIDRDGTKTYGGYSDLIVVDQHYVLRFPDNMPLDAGAPLLCAGITVYSPMKYYGMTEPGKHLGVAGLGGLGHVAVKIGKAFGLKVTVISTSPKKESEAISKLGADAFLVSSDPAKVKAAMGTMDYIIDTVSAVHSLAPLLGLLKVNGKLVTVGLPEKPLEVPIFALVGARRLVGGSNVGGMKETQEMLDFCAKHNIAADIELVRMDQINTAMERLAKSDVKYRFVIDVGNSKLQ*	7	17255496	17259980	-1	aCL3874Contig1							Cs1g04910.1	95.6
CitCAD7	Ciclev10028651m	ATGGGAAGCCTTGATACCGAGAGAGCAACGATAGGGTGGGCTGCAAAGGATCCATCTGGGATTCTGTCACCTTACACTTACACTCTCAGAAACACAGGAGCAGAAGATGTTTACATTAAGGTTCTTTACTGTGGAATCTGCCACACTGATATTCATCAAATAAAAAATGATCTGGGCATGTCTAACTATCCAATGGTTCCAGGACATGAGGTGGTGGGTGAAGTGAAGGAAGTGGGTTCAGAAGTGAGCAACTTTAAAGTAGGAGACAAGGTTGGTGTTGGGGTTCTCGTTGGTTGTTGCAGAAACTGCAGGCCGTGCGAGGCAGATGTTGAGCAGTACTGCAACAAGAAAATCTGGTCCTATAACGATGTTTACACCGATGGCAAGCCTACACAAGGC…	MGSLDTERATIGWAAKDPSGILSPYTYTLRNTGAEDVYIKVLYCGICHTDIHQIKNDLGMSNYPMVPGHEVVGEVKEVGSEVSNFKVGDKVGVGVLVGCCRNCRPCEADVEQYCNKKIWSYNDVYTDGKPTQGGFAESMVVDQKFVVKIPDGMALEQAAPLLCAGVTVFSPLSHFGLKQSGLRGGILGLGGVGHMGVLIAKAMGHHVTVISSSDKKRVEAMEHLGADQYLVSSDATRMQEAADSLDYIIDTVPANHPLEPYLSLLKLDGKLILTGVINTPMQFLTPMVMLGKSLYLPLSINDYISRSNSIKTTLRIETIQRTSMLLVMVALFLTLFFFFLSQLLIFYFLSFPEFFFVGAILCREKGNHGELHWEHEGDKGNA*	8	2599717	2601858	1	aIC0AAA18AD10RM1_c|aCL1427Contig1							Cs8g04980.1	83.5
Casparian strip membrane protein (CASP) & CASP-like (CASPL) proteins
CitCASP1	Ciclev10013511m	ATGAGTGATTCAGCTACCGTTGATGTTCCAGAGTCTAGCTCGGCTGCTAAAGGAAAAGCACCCCTCATCGGAGTTCCAAGGCGGGAAAAGGCTGGATACAAGAAAGGAATAGCAATATTTGATTTCATTCTGAGGATTGGTGCCCTGGTGTGTACTCTAGCTGCTGCCACCGCGATGGGAACTAGCGATGAGACTCTTCCATTCTTCACTCAGTTCTTTCAGTTTCAAGCCAGCTATGATGATCTTCCCACTTTTCAGTATTTCGTAATTGCAATGGCATTAGTAGGGGGCTACCTAGTCCTTTCCCTTCCCATTTCCATTGTCACTATTGTTCGCCCACATGCTGTTGGACCGAGGCTCCTCCTACTCATTTTGGACACCGTAACATTAACTTTTGCT…	MSDSATVDVPESSSAAKGKAPLIGVPRREKAGYKKGIAIFDFILRIGALVCTLAAATAMGTSDETLPFFTQFFQFQASYDDLPTFQYFVIAMALVGGYLVLSLPISIVTIVRPHAVGPRLLLLILDTVTLTFATAAAAAAAAIVYLAHNGNQNTNWFAICQQFGDFCQKVSGAVVASFIAVVLFVMLVVLSGFALRKH*	6	20241726	20242642	-1								Cs6g14190.1	100
CitCASP3	Ciclev10030236m	ATGGAGTCGGCCCACGCAATCGACATGCCCGAATCAAAGAAGGCTAATGGTAGCGGCAAAGGAAAGGCTGCTGTCGGAGCTCCTGCAGCTGCCGTGGCCACAACAAAAGCCACACCACACCCAAGAGGAGGATGGAAGAAAGGTGTCGCGATCTTCGACTTCGTTTTGAGACTCGCTGCCATTGGTGCAGCTCTTGGTGCCACTGCTACAATGGGCACTGCTGATGAGATTCTCCCTTTCTTCACTCAGTTCTTCCAGTTCGAAGCTCAATATGATGATTTCGAAGTTTTCATGTTTTTTGTCATTGCAAATGGACTAGTGAGTGCATACCTTGTACTCTCCTTACCTTTCTCTATACTCTGCATTGTTCGCCCTCATGCTGTTGGACCAAGGCTGCTC…	MESAHAIDMPESKKANGSGKGKAAVGAPAAAVATTKATPHPRGGWKKGVAIFDFVLRLAAIGAALGATATMGTADEILPFFTQFFQFEAQYDDFEVFMFFVIANGLVSAYLVLSLPFSILCIVRPHAVGPRLLLLIGDTVMMALTIGAAAAAASVVYLAHSGNPNANWLPICQQFGDFCQSTSSAVVASLIAAALLLILIVLSAFALRRRT*	8	19224320	19225160	-1								Cs8g14760.1	100
CitCASP5	Ciclev10013539m	ATGAAGGCAGGTGCTGTTGAGATTGGCGAGGCCAAGAATTCAACCCCAACATATGGGGTGAATAAAGGAATTTCAATACTAGATTTCGTTTTGAGGCTGCTTGCTTTCGCTGGTGCTCTAGGAAGTGCAATTGCCATGGGAACAACTAATGAAACACTTCCTTTCTTCTCACAACTCATTCGATTCAGGGCTGAGTACGATGATCTTCCTTCGCTCACGTTTTTTGTGGCAGCCAATGCTGTTGTGAGTAGATATCTGATCTTGTCTCTCTCTCTTTCGATCTTCCATATCGTTAGAAGCAGAGCACAAAAGAGTAGAATTCTCTTGGTCTTCTTTGACACGGCAATGCTAGCTCTTTTGACGGGTAGTGCATCAGCAGCTGCTGCTATTGTATACTTA…	MKAGAVEIGEAKNSTPTYGVNKGISILDFVLRLLAFAGALGSAIAMGTTNETLPFFSQLIRFRAEYDDLPSLTFFVAANAVVSRYLILSLSLSIFHIVRSRAQKSRILLVFFDTAMLALLTGSASAAAAIVYLAHKGNAKAKWFAICQQFNSFCQRISGSLIGSFVGMALLILIIMLCGVALSRR*	6	25063126	25063907	1								Cs6g21500.1	98.9
CitCASPL1A1	Ciclev10033634m	ATGAAGGCAGAAGCAGAGCCAGTTAGTGAGGCTGGTGAGGCGTCAAGGGATGAAATCTCAACTCACGAGATGAACAAAGGGATCTCTATTTTAGACCTTATTCTAAGGACTATTGCAGCTGCTGGAACATTTGGAAGTGCCATTGCCATGGCCACTACGAACGAGACACTAACAGTTTTCCCACAATTCACCCAAGTTAGAGCAGAGTACGATGATCATCCCTCGTTCAAGTTCTTCGTGATAGCCAACTCGATTGTGTGCGGATATCTTGCTCTTTCTGTCCCTTTATCTATCTTCCACATTATCAGGACAGCTGCTAAAAAAAGTAGAATCTTGTTGCTCGTTTTTGACTTGGTAATGCTAACTCTTGTCACAGCCGGAGCTTCTTCAGCAACAGCC…	MKAEAEPVSEAGEASRDEISTHEMNKGISILDLILRTIAAAGTFGSAIAMATTNETLTVFPQFTQVRAEYDDHPSFKFFVIANSIVCGYLALSVPLSIFHIIRTAAKKSRILLLVFDLVMLTLVTAGASSATAIVYLAHKGNTSANWFAFCQLFDSFCERISGSLIGSFAAAVTLMLVIVTSAVALSRS*	4	24036996	24037820	1								orange1.1g044764m	96.3
CitCASPL1B1	Ciclev10016765m	ATGGCTCCAGAAAATAACGCAAAGCCAGAGCCAGGGCCCAAAATAGTGCCTGTAACAAAGCCTAAAGGTTGGGTCGTGTTGGTTTTGAGGCTGCTTGCACTTGCTGCCACTGCTTCAGCCACAATTGTGATGGGACTCAACAAAGAAACCAAAACCTTTGTGGTTGCTACTGTTGGCACTACTCCTATTAAGGCTACTTTCAGTGCCAAGTTTCAACACACCCCTGCATTCGTGTTCTTTGTGATAGCTAATGGACTGGTCAGCTTTCATAACCTGGTGATGATATCAGTAAATTTATTTGGAAAGAAGCTTGACTATAAAGGACTTCGCCTCGCCATGATTGCCATTTTCGACCTGCTGAACACAGTCCTGGCATCGGCTGGTGTAAACGGAGCGGTT…	MAPENNAKPEPGPKIVPVTKPKGWVVLVLRLLALAATASATIVMGLNKETKTFVVATVGTTPIKATFSAKFQHTPAFVFFVIANGLVSFHNLVMISVNLFGKKLDYKGLRLAMIAIFDLLNTVLASAGVNGAVYMAELGKHGNSHARWNKICDRFKTFCDHGGGAIIASFIGLALMIVISIISIVKLAKSKSNTPLLGEP*	2	30884479	30885712	-1	aKN0AAP5YA15FM1_c							Cs2g10390.1	99
CitCASPL1D1a	Ciclev10005986m	ATGGCGTCTGAAGCTCCAGCGAAATATGAAGATCAAAGGGCGGTGCGCGAAAACTATTTTGGCATCGATGTGGGTCTTAGGGTATTGCTGTTTGCAGCAACGCTCGTTTCCGTAATCGTCATGGCTACCGCCAAGCAAACTGAGCTCGTAAGCGCACCTGGGATTCCTTTTAGAGTCAGCGTTAAAGCCAAGTTTACCGATTCCCCGGCTTTCATATATTTTGTCGCGGCACTATCGGTTGCTTGCCTATACAGTATCATCACAATGCTTGCATCACTTTCGGTGGTCTCCAAGCCAGCTTCCGCAAAACGGCTGCTGCTCTATTTCGCATTCTGGGACGTGGTGATGTTGGGGATCGTAGCATCGGCAACTGGGGCATCGGGAGGGGTGGCGTATATC…	MASEAPAKYEDQRAVRENYFGIDVGLRVLLFAATLVSVIVMATAKQTELVSAPGIPFRVSVKAKFTDSPAFIYFVAALSVACLYSIITMLASLSVVSKPASAKRLLLYFAFWDVVMLGIVASATGASGGVAYIGLKGNDHSRWTKICNVYDKYCRHIGSATGVSLLAAVLLVLLSMLSSYSLYLRIRD*	9	2177337	2179856	1	aCL6688Contig1							Cs9g04890.1	98.9
CitCASPL1D1b	Ciclev10006955m	ATGGTCACTAGCAAGCAAACCGAGCGCGCGCCTGTCTCGGGAGTCTTGCCCTTTCTGACACTCAGAGTTCCAGCCAAGTTTAATTACTCCCCTGCTTTCATATACTTCGTGGCTGCATTATCTGTGGCTGGCCTGTACAGTATCATCGCAATGCTTGCTTCAATTTCCGCCATAAAAAACCCATCTAGAAAGGTCTTGCTCATGTTGGCATTTTGGGACGTGGTGATGCTGGGGGTGGTAGCTTCAGCAACGGCGGCGTCGGGGGCGGTTGCGTACATCGGATTAAAAGGCAACGACCACATTGGATGGAGAAAGATGTGCAACGTTTTCGACAAGTTCTGTAGGCACATAGCAAGCGCCACAGCGGTCTCACTGGTGGCTGCAATTCTTCTTGTTCTG…	MVTSKQTERAPVSGVLPFLTLRVPAKFNYSPAFIYFVAALSVAGLYSIIAMLASISAIKNPSRKVLLMLAFWDVVMLGVVASATAASGAVAYIGLKGNDHIGWRKMCNVFDKFCRHIASATAVSLVAAILLVLLSMISTYSLYKRIHD*	9	2181396	2182124	1								Cs9g04900.1	76.7
CitCASPL1D2	Ciclev10006657m	ATGGCGTCCCTCGATAACCCAGCATCCGAGCTAAAAAATGAAACTCCTCGACCTAGTCGAGTAATCTATTTTCGCATTGACATTGCTCTTAGGATCTTATTGTTTGTGTTTTCTTTTGTTGCAATTCTTCTCATTGTCACTAGCAAGCAAACAAATCTTTTCCCGGTGCCCGGAACAACTTTTTCAGTGAAAATTCCGGCCAAGTTTACTTATTTTCCAGCCTTCATTTTCATTACAGCACTCACATCTCTTTCGGCAATCCGCAAGCTAGCTTATCGGAAAAGGTTATTGCTTCTGATTGCATTTTTGGACACGTTGATGCTGAGGGTGGTAGCTTCAGCAATAGGTGCTGCACTAGCAGTTGCATATATAGGACTTAAAGGCAACAGTCATGCCGGA…	MASLDNPASELKNETPRPSRVIYFRIDIALRILLFVFSFVAILLIVTSKQTNLFPVPGTTFSVKIPAKFTYFPAFIFITALTSLSAIRKLAYRKRLLLLIAFLDTLMLRVVASAIGAALAVAYIGLKGNSHAGWNKVANAGYDKFIKHTATAIALSIFAVTDLVTLTMHST*	9	2191085	2191819	1								Cs9g04910.1	95.9
CitCASPL1E1	Ciclev10005989m	ATGGATGGGCTGGAGGGAAAGTCAGAGGTTGCAGGAAATTATAAGAGAAAGCTGAATCATGGTGATTTGAGTCTGAGGGTATTGGCCTTGGCGCTAACACTTGTCGCAGCAATAGTTCTTGGAGTTGGTAAGCAAAATAAGGTTGTTCCACTCAAGATTATACCAACTTTGCCTCCTGTTAATGTTGCAGTCACCGCTAAGTGGCAGTACTCTTCTGCTTTTGTGTTCAATGTGGTGTCAAATGCCATAGCATGCTCATACGCAGCAATCTCTCTACTCCTTTTGCTGGCTGACAAGAATGGAAACAAGGGCTTGGCTATGTTGATCCTTCTTCTTGACCTAGCAATGGTAGCGCTGCTCTTTTCGGCCAACGGCGCCGCTGGTGCCGTCGGCCTCGTG…	MDGLEGKSEVAGNYKRKLNHGDLSLRVLALALTLVAAIVLGVGKQNKVVPLKIIPTLPPVNVAVTAKWQYSSAFVFNVVSNAIACSYAAISLLLLLADKNGNKGLAMLILLLDLAMVALLFSANGAAGAVGLVGYQGNSHVQWRKVCDVFGEFCSHVAVAVVLSLLGSLAFFLLVALAAMRILKKTN*	9	2168387	2170546	-1	aCL4845Contig1							Cs9g04880.1	100
CitCASPL1E2	Ciclev10023477m	ATGGGGAGCCAGTACAAACCCAGCAACATGGACGGAGTTGCAACTGTAAGCAATGTGAAAGTTGTGGAGAGCTCAAAGAGAGTAATGTTCAAATCCAGTGATGTTATGCTACGTATTCTGGGATTCTCCCTCACATTCATTGCTGCGATTGTTGTTGGTGTTGATAAGGAGACTAAGATTATTTCTTTTACTCTTGCCGAAACCATGCCCTCTGTGCAAGTTTCTGTCACTGCTAAGTGGCAATTTATGTCTGCTTTTGTGTACTTCCTAGTATCAAATGCTATAGCAAGTTCATACGCAGCATTATCTTTGGCATTTACCTTGGCAATCACGAGATTCCACAACAACGCAGCTTTGGGACTCATCATGTTAGATTTAATCACCATGGGGCTGCTGTTC…	MGSQYKPSNMDGVATVSNVKVVESSKRVMFKSSDVMLRILGFSLTFIAAIVVGVDKETKIISFTLAETMPSVQVSVTAKWQFMSAFVYFLVSNAIASSYAALSLAFTLAITRFHNNAALGLIMLDLITMGLLFSANGAAMAIGMIGLKGNSHVHWNKVCNVFGGFCRNFTAALVLSILGSFAFLFLVAVAILNLHKRSQ*	3	45342528	45343515	1								Cs5g32540.1	100
CitCASPL1F1a	Ciclev10016868m	ATGGCAGTCGAAACAGCAGCTGCTAAATATTCTTCTTCAAGTTGGCCCTGGTCCAACAAAAGATTCTTCGTGGCTCAAATTACGCTCAGAATTTTAGCCACTGCTTTCTCATTGGCTGCAGTCTCTCTTATGATCACCGGTACTCAAACTGTCCTTGTCTTTTTGGTCCAGATGAAGGTTACTTACAGCTCCTCATCCGCATGGAGGTTCTTGTTCGGTGCCAACATTGTCACATGTATTTTATCAGTGCTTTCTCTGATTTTTGTTTGCCTTATTAGCCGCTCAGCATCCCACATGAAATATTTTCTCCTATTTTTGCATGACATGGTGACAATGGTGTTGCTGATATCAGGATGCGCGGCGGCGTCTGCAATTGGTTATGTAGGCAAGTATGGAGAA…	MAVETAAAKYSSSSWPWSNKRFFVAQITLRILATAFSLAAVSLMITGTQTVLVFLVQMKVTYSSSSAWRFLFGANIVTCILSVLSLIFVCLISRSASHMKYFLLFLHDMVTMVLLISGCAAASAIGYVGKYGELKMGWGPVCGFAPKFCNRSTISLVLSYLAFLCYMGLTILSAHKLLSRATE*	2	12549543	12550712	-1								Cs2g14140.1	100
CitCASPL1F1b	Ciclev10032880m	ATGGAAAGCTCCCAAGCCATTAAGTTCCCGCAAAGCCAACCTCATCATCAACCTCTAAAATATCAAAAACGTTTCCATGTTGCACAAATTTGCTTGAGGATTTTGGCCATAGCAACTGCATTGGCTGCCACCTGGGTGATTCTCACTAGCAAGCAACACCTTGTCATTTTTGGGATCCCATTTGATGCTCGATACAGCTATTCTTCAGCTTTCAAGTTCTTTGCTTTTGCAAACGTAGCTGCAAGTGCTTTTTCTCTCCTCTCATTGCTCTATCTTCTCATTGTACCCGCAAGTTATTTCTTGTTGTTCCTTCATGATCTGTTCACGATGTCCTTGTTACTGGCCGGATGTGCGGCGGCGACAGCAGTTGGATACATTGGACGGTACGGTAACGAGCAC…	MESSQAIKFPQSQPHHQPLKYQKRFHVAQICLRILAIATALAATWVILTSKQHLVIFGIPFDARYSYSSAFKFFAFANVAASAFSLLSLLYLLIVPASYFLLFLHDLFTMSLLLAGCAAATAVGYIGRYGNEHIGWMAICEQFGKFCNKVTASVMLSYLSFLCLLVLTIISASRSRQFHA*	4	13634692	13635540	1								Cs7g19940.1	99.4
CitCASPL2A1	Ciclev10022266m	ATGGAGAAGAGTAATAATATTGGTGGTGCGGTTGCTGCAAGCTCTCCTCTGCCAATGATGGGATCGAGGGCTCATCAAGAGATCAATGAGGATGGCAACGCTGCCTTGCGCACAGCTGAGCCAATTGCACGTTTGGTGCCAATGGCTCTCTGTGTTGCTGCACTTGTGCTCATGCTTAAGAACTCTGAGACTAGTGACTTTGGCTCTCTTTCTTACTCCGACCTTGGAGCCTTCAGGTATTTAGTGCATGCCAATGGCATTTGTGCAGGCTATTCGCTTCTTTCAGCAATTATTGCAGCCATGCCTCGTCCCTCCACCATGTCTCAAGCCTGGACTTTCTTTTTCCTTGATCAGTTGCTCACTTACTTGATTCTGGCGGCTGGAGCCGTGTCGACGGAG…	MEKSNNIGGAVAASSPLPMMGSRAHQEINEDGNAALRTAEPIARLVPMALCVAALVLMLKNSETSDFGSLSYSDLGAFRYLVHANGICAGYSLLSAIIAAMPRPSTMSQAWTFFFLDQLLTYLILAAGAVSTEVLYLERKGDLAITWSAVCGSFGGFCHKAIASVIITFVAVACYVVLSLISSYKLFSKYDAPIACSGKNIEVAAFHG*	3	29133571	29136023	-1								Cs5g15150.1	100
CitCASPL2B2	Ciclev10016754m	ATGAGTTATTTGGGTGTTGGTGTTAGTCCAGGGAATGTGCCAGTGTATCGTGGCACCGTAATGAAGGTTGTTGATAGGAGAATAAGGCTTGTAGAGTTGGTTTTGAGGTGTGTGATCTGTGGTTTAGGTGCTCTTGCTGCTGTTCTTGTTGGGACTGATACCCAAGTCAGAGAAATCTTCTCAATTCAAAAGAAAGCTAAGTTTACAGACATGAAAGCTCTTGTGTTTTTGGTGGTAGCAAATGGAATAGCTGCAGCCTACTCTTTAGTGCAAGGGGTGCGCTGTACCGTTGCTATGCTCAAGGGAAGTGTGCTCTTTAACAAGCCACTAGCCTGGGCAATTTTCTCTGGAGATCAGATGATGGCATACTTGACAGTAGCTGCCGTGGCAGCTGCTGCG…	MSYLGVGVSPGNVPVYRGTVMKVVDRRIRLVELVLRCVICGLGALAAVLVGTDTQVREIFSIQKKAKFTDMKALVFLVVANGIAAAYSLVQGVRCTVAMLKGSVLFNKPLAWAIFSGDQMMAYLTVAAVAAAAQSAVFAKLGQPELQWLKICNMYGKFCNQVGEGIASALLVSISMVVLSCISAFSLFRLYGGSKAKNGARW*	2	35994368	35996314	1	aCL5933Contig1							Cs2g01940.1	99
CitCASPL2C1	Ciclev10009662m	ATGGATGTACAAAAAATTGAGGCTTTTGTAAGGGTTTGCGCAGCGTTGCTCCTGCTCTTGACAGCATGTTTAGTTGGCTTGGATACTCAATCCAAGTATATTTTTTACGTCGACAGAAAAATTACTTACAAGGAATTGCATGCTCTCGGAGCTTTGGTTTACGTTGCTTCAGCTGCTGCGGGTTATAATCTTCTTCAACTGGGTAGAAGTGTCTTCGTGAGCCGCTATCTGGGAAACTCAAAGGGGTCTTACAGATATCTGGCTTGGGTTTCTTATTTGTTGGACCAGATGGTAGTGTACATAGCATTTGGCACAAACTCAGCAGCAGTTGAGCACTCAGTACTGGCACTAAGTGGCATGAAGGAATTTCAGTGGATGAAATGGTGCAACAAGTTTACC…	MDVQKIEAFVRVCAALLLLLTACLVGLDTQSKYIFYVDRKITYKELHALGALVYVASAAAGYNLLQLGRSVFVSRYLGNSKGSYRYLAWVSYLLDQMVVYIAFGTNSAAVEHSVLALSGMKEFQWMKWCNKFTRFCFQIGGALVSGYAACALMVLATSISAFNLFRLYSSEKFLRLKST*	1	27332614	27333762	-1	aCL8344Contig1							Cs1g10020.1	100
CitCASPL2D1	Ciclev10009601m	ATGAAGATGAGAGGAAATGTTAGTGATAATTCATCCAGCTCCATTAACCGCTTCCCGATGCTTAAGCTTGTAGATTGTTTCCTTAGAATTTCTGCCATTCCTCTCAGTATTGCAGCCATATGGCTAACTGTGACTAACCAGGAAGATAATAGTGACTATGGGAAATTAAAGTTCAGCAATCTCACCGGACTCAAGTACATGGTTTGCATCAGTGGTATATGTGCGGGTTATGCATTTATTGCTGCCGTTTCCTCATGGCTCAGATTCCTGGTCACAAAAGCATGGCTTTTCTTTATATCTGACCAGATTGTGGCTTACTTAATGGTGACATCTGGGGCAGCAGTGTTGGAGATACTGTATTTAGCCTACAATGGGGATCAACAAGTCACATGGAGTGAA…	MKMRGNVSDNSSSSINRFPMLKLVDCFLRISAIPLSIAAIWLTVTNQEDNSDYGKLKFSNLTGLKYMVCISGICAGYAFIAAVSSWLRFLVTKAWLFFISDQIVAYLMVTSGAAVLEILYLAYNGDQQVTWSETCSTYGKFCSRIKIAFVLHAVALGCFIILAVISAFRFFSMFDPPSVSSNKEEEEGRT*	1	22449031	22450169	1								Cs4g10220.1	100
CitCASPL3A1	Ciclev10026574m	ATGAACGGCCAGAAAGCAGAGGAGGGAATGGGGAAAGGTGTAAGCAAGAGAGATGGAGTGGTGCAGGTGATATTAAGGCTACTGAGCTTGGCGGCATCAGTAATGGCCATGTCATTCATGGTGACAGCCCGTCAGAACGGTGTAGCTTCTGTCTATGGCTTTCCACTTACTCTCCGTTCGAAGTGGTCTTACTCTTATGCTTTTGAGTATCTGGTTGGAGTTTCTGCAGCTGCTGCTGCTTACTCCTTGCTGCAATTGCTTCTTACTGGATCAAGGCTTCTGAGGAAAGCTACTGTTATCTCCTCAAAAAGACAAGCTTGGCTTATATTTGCTGTGGATCAGATTTTTGCATATGCAATGATGAGCGCTGGGTCAGCTGCAGCTGGGATCACCAACCTG…	MNGQKAEEGMGKGVSKRDGVVQVILRLLSLAASVMAMSFMVTARQNGVASVYGFPLTLRSKWSYSYAFEYLVGVSAAAAAYSLLQLLLTGSRLLRKATVISSKRQAWLIFAVDQIFAYAMMSAGSAAAGITNLNRTGVKHTALPNFCKALHSFCDHVAVSITFTFFGCLVLAASALQDVIWLSKC*	7	8571967	8574224	1								Cs1g15560.1	96.3
CitCASPL4A1	Ciclev10015951m	ATGGAAAAACACGAACAAGAACAAGAAAAGGACCACAACACGGACCGGGACCCGGCTCCGAACCCACCATCCAAGATGCAATCTCCTCCACGGGAACCAGACCTCGAACCCATAACACTATCCCAAAACCCACCACCGGCAACGCTTCCCCCACGCCGCCAACCGGAGCTCCAACCCATTAGATTGAGCGCGAGCCCATCACCGGAAACGCTCTCTCCACTATCCGAACCAGAGTTGGAACAGCACACAACCCACAACCCACCGCTGGGACAAGAACATCTCCACCACTACAACTCCACGCCCGAATCACCGGCGTTGGATTTCTCACATCACGAAGAAGAAGAAGAAGAAGAAGAAGAGAAACACAAACAACCACCTCCAGTTAAGCCTCATATATCT…	MEKHEQEQEKDHNTDRDPAPNPPSKMQSPPREPDLEPITLSQNPPPATLPPRRQPELQPIRLSASPSPETLSPLSEPELEQHTTHNPPLGQEHLHHYNSTPESPALDFSHHEEEEEEEEEKHKQPPPVKPHISSAAAPDTESAPSNIGSARKILRTNLTILKRAKRDNTIKKSLLGFRVCGFVFSLVAFSVLAADKDRGWARDSFYRYKEFSYCLAVNVIVFVYSGFQSFDLAYRLTAGHRKPRQILRYYLDFSLDQILTYLLLSASSSAAVRVDDWQSNWGEDEFPDMAKASVALSFLAFVALGFSSLISGYALYNQKSR*	2	9112389	9114946	1	aCL1244Contig1							Cs2g28190.1	96
CitCASPL4A3	Ciclev10021392m	ATGGAAACCAAATCACAACATCAAAACATACAGCAAAAGACAAACACAAAGAGAGCCAACGGCAACAACATGAAACGATCTTCGTCGTCGAACTCCGACTCTCCTCACTCACCGCACCGTTTCCACTCGCCACTCCGATCCGACCCGGGCGACCCCGACCCCCCCGACGCCTTCGCTTCTCCTGACGCCTCGCCACAGAAGTCACCGATAAATCATGACGACAAACCGAACTCGAAAGCCATCGTCGCCGTCGCCGACAAGTTCACGCAGAGCTCTCCGATGCTGGAGAAGCCGGCGGAGGTAAAGACTTCTGTAATGTTTAACAAGGCAGTGAGAGAAGACGGTACGCCTTCTGTGATGAAGACCGAACCCGGCCGAGTAGGAGGAGGGAGATCGGGG…	METKSQHQNIQQKTNTKRANGNNMKRSSSSNSDSPHSPHRFHSPLRSDPGDPDPPDAFASPDASPQKSPINHDDKPNSKAIVAVADKFTQSSPMLEKPAEVKTSVMFNKAVREDGTPSVMKTEPGRVGGGRSGPVASILKRSKFEARLMFANLGFRLIEVVLSLISFSVMAADKTQGWSGDSFDRYREYRYCLSVNVIAFVYSGFQAYDLAYYLAKGKHVIRYHLRQPFDFFMDQILAYLLISASSAAATRVDDWQSNWGKDEFTEMASASVAMSFLAFIAFALSSVISGYNLFNHDS*	3	3006218	3008357	1	aCL1833Contig1							Cs5g05350.1	99.3
CitCASPL4A4	Ciclev10024020m	ATGAAACAAGAAAGAGATGTTTTGGTGATTGCTTGTGCACCAATGGCCAGTGCCTCGCCTGCAGCAGCAGCCGTGTCCACTGTTTCGCCAGTGATAGCTAGTTCTTTGACTCCACAACAAACGTTTCCAACTCCATCACCTTTCTCTTTTTCAGTTGCCTCTACAAGGTGGAGCTCCAGACCTTCCATTCATTTTTCCAATCTTTTTCTTAGGTTCTTGGCACTTGTGTTCTGCTTTGTCTCTGCTCTCTCACTGGCTGCTCCATCGCCCAAGAAAAAAGGCCAGCAACCTTCTAGCTTCACTGGGTATCCAGAATTAGTTTACTCCTTCACTGTAGACATCTTGGCTTTTGCATACTCATCTTTCCAGCTCTTTAAAGGTATCTGTGACATTGCTCAC…	MKQERDVLVIACAPMASASPAAAAVSTVSPVIASSLTPQQTFPTPSPFSFSVASTRWSSRPSIHFSNLFLRFLALVFCFVSALSLAAPSPKKKGQQPSSFTGYPELVYSFTVDILAFAYSSFQLFKGICDIAHRGIIIPDKISDYISFILDQLMGYLLISSSSVAIPVIQDIDQMHSLWKAAIVSTCMSFVTFVVIVSCTLLSGYKLCKRIIW*	3	7056594	7057466	-1	aC08028B10SK_c							Cs5g10520.1	100
CitCASPL4B1	Ciclev10012823m	ATGTCAGAAATGGAGGAGAAAAAAGGAGTGGAGTCACCACAATTCGAGACCCGAATGGATGCGCCGACGGCTGACGTGGAGAACCAGACGCCGTCGTCTGGGTTCGGTGTCGCGGCGATTACAAGGCGATGGAAGAGGGAGGATTTGCTGAAGAGAGGGTCTCTGGCTTTGAGGGGATTGGCTATGGTATTTTCTCTGCTTGCTTTCATTGTCATGGCCAGTAACCGGCATGGTGATTGGAAAGATTTTGATAAATACGAAGAGTTCAGATATGTTTTGGCGATAGCAATTCTTTCGACTCTCTATACTCTAGGGCAAGTTTTGCGTCATGTTCACGAGTTATCAACAGGCAGACAAATGATGCAGAAGCGAACCTCTGCATTAATTGACTTCTTTGGA…	MSEMEEKKGVESPQFETRMDAPTADVENQTPSSGFGVAAITRRWKREDLLKRGSLALRGLAMVFSLLAFIVMASNRHGDWKDFDKYEEFRYVLAIAILSTLYTLGQVLRHVHELSTGRQMMQKRTSALIDFFGDQIISYLLISSASSAVPMTNRMREGADNLFTDSLAASISMQFLAFLALAFSALISGYKLSSQSYI*	6	17111896	17113568	1								Cs6g09410.1	100
CitCASPL4C1	Ciclev10032822m	ATGCGCTCGCCACAGTCCCTTCACAACGGCGACACCCCGTCCCCGCTCCCACGAATCCCTCACTTTCAGTCCACTCTGTCCGTACAGAAACTCAGACGATTCAACTCACTGATTCTAGTCTTCCGTCTCGCCGCCTTTTGCTTCTCTCTTGCTTCTTCCATTTTCATGCTAACTAACTCCCGTGGCTCCAACTCCCCTCGTTGGTACGATTATGATGCTTTCAGATTTGTTTTCGCTGCAAATGCAATAGTGGCCATTTACTCTCTTTTCGAAATGGGCGTCTCCGTTTGGGAAATCTCCAGAGGAGCCACGTTTTTCCCCGAAGTTTTGCAAGTTTGGTTCGATTTTGGCCACGATCAGGTTTTCGCATACCTGTTGCTGTCGGCGGACTCGGCGGGG…	MRSPQSLHNGDTPSPLPRIPHFQSTLSVQKLRRFNSLILVFRLAAFCFSLASSIFMLTNSRGSNSPRWYDYDAFRFVFAANAIVAIYSLFEMGVSVWEISRGATFFPEVLQVWFDFGHDQVFAYLLLSADSAGTELARTLKGTDTCTAANAFCLQSDISVALGFAGFLFIGVSSLLSGFRVACFIINGSRFHL*	4	2772550	2773801	1								Cs7g28920.1	100
CitCASPL5A1	Ciclev10012909m	ATGTTCGCGAGCCGGCCAGCGGTGCACCCAGTGGAGGCGCCACCGTTGACTGAGGCGGCGGGACTTAGAGTTAGAATGAAGGATGTGCAAGGCATGCCTGGGACACCTGGCGGCCTTGTTCTTCGTCTTCTTCAGTTTGTTTTCGCAGCCATAGCAGTCTCTGTCATGGCCTCCACCAGTGATTTTCACGAAGCCACCGCTTTTTGCTACCTAGTTCTTGCTCTAGGCTTGCAAAGTTTGTGGAGTCTATCCCTGTTAGTGCTTGATATATATGCTATCCTGGTGAGAAGAAGTCTGCGGAATGATAAGGTTATCCGTTTATTTACCGTTGGTGATGGGATCACATCCACCCTTACGTATGCAGCCGCCTGCTCATCTGCAGGAATCACAGTTCTTATC…	MFASRPAVHPVEAPPLTEAAGLRVRMKDVQGMPGTPGGLVLRLLQFVFAAIAVSVMASTSDFHEATAFCYLVLALGLQSLWSLSLLVLDIYAILVRRSLRNDKVIRLFTVGDGITSTLTYAAACSSAGITVLISNDLNRCGINHCTRFETATAMAFISWFATSPSFLLNFWSLASH*	6	10318647	10320818	1	aCL1462Contig1							Cs6g11760.1	100
CitCASPL5A2a	Ciclev10029379m	ATGAACGTGAGCCACGCGTCGGTTCACCCGGTTGAAGATCCTCCAACTACAGAAGGTGGGAATGCCCCGAGAGTGAGGATGAAGGACATACAGGGCATGCCGGCGACGCCTGGTGGGCTGGCTTTGCGTGTATCTCAATTTATCTTTGCTGTTGCAGCACTTTGTGTGATGGCCACCACTAGCGACTTTCCTTCGGTCACTGCTTTCTGCTTCCTTGTTGCGGCTGCTGGCTTGCAGAGTTTGTGGAGCCTTTCACTGGCAATTGTAGATATTTATGCCCTTTCAGTGATGCGATCGTTGCAGAATAGTAGAATTGTCAACTTGTTCACTGTTGGTGATGGGATAACATCTACTCTTACATTTGCTGCAGCATGTGCTTCAGCCGGCATCACAGTTCTT…	MNVSHASVHPVEDPPTTEGGNAPRVRMKDIQGMPATPGGLALRVSQFIFAVAALCVMATTSDFPSVTAFCFLVAAAGLQSLWSLSLAIVDIYALSVMRSLQNSRIVNLFTVGDGITSTLTFAAACASAGITVLIDNDLQSCSQNHCIQFETATAMAFISWFTALPSFLLNFWSLASR*	8	21919215	21923184	1	aCL8026Contig1							Cs8g16460.1	100
CitCASPL5A2b	Ciclev10029723m	ATGCAGAATAATAGAATTGTCAACTTGTTTACCGTTCATGATGGGATAACATCTACAATTATATTTGCTGCAGCGTGTGCTTCAGCTGGCATCACAGTTCTTATTGACAATGATCTTCAAAGCTGTTCCCAGAATCATTGCGTACAGTTTGAAACTGCTACAGCCATAGCCTTCATTAGCGGGTTTACTGCTTTACCCTCTTTTCTATTAAATTTACGGTCATTGGCATCTCGATGA	MQNNRIVNLFTVHDGITSTIIFAAACASAGITVLIDNDLQSCSQNHCVQFETATAIAFISGFTALPSFLLNLRSLASR*	8	21937475	21938102	1								Cs8g16460.1	39.6
CitCASPL5B2	Ciclev10012998m	ATGAAGGAGTTAGTAGGGAGTCCGGGTACAGTGAGTGGGTTGATGCTGAGGATCGGGCAATGTGGATTTGCTGCTGCCGCTATTGGAGCCATGACCTCTGCTGCTGGCTTCTCTAGCTACACTGCTTTCTGCTATTTGATTGCATCAATGGGGCTTCAAATGCTGTGGAGCTTTGGACTAGCATGTCTTGATATTTATGCTTTAAGGAGAAAACGAGACCTTCAAAATCCAGTCCTAGTCAGCCTGTTTGTTGTAGGTGATTGGGTCACGGCTATGTTATCACTTGCGGCTGCATGCTCCTCAGCTGGGGTTGTAGTTCTTTATGCAAAAGATTTGAATTTTTGCATGCCTCAAAATAATCTTGCATGCCACAGCTTTGAGGTTTCAGTAATTTTAGCA…	MKELVGSPGTVSGLMLRIGQCGFAAAAIGAMTSAAGFSSYTAFCYLIASMGLQMLWSFGLACLDIYALRRKRDLQNPVLVSLFVVGDWVTAMLSLAAACSSAGVVVLYAKDLNFCMPQNNLACHSFEVSVILAFITWLLIALSSHVMFWILASV*	6	14757182	14759691	-1								orange1.1g031701m	99.4
CitCASPL5B3	Ciclev10006143m	ATGAGGGTCTTTGCAGGCACGCCTGGGACTGCAACTGGGTTATTTCTGAGGATTGCTCAGTGTATTTTTGCAGCTGGGTCTATTGCTTCCATGGCTTCCACCCACTCTTTCTTCAATTTTACAGCTTTCTGCTACCTAATTGCTGCTATGGGCTTGCAAGTTATCTGGAGCTTTGGACTTGCCTTAATAGATGCATATGCCATAGTGCAAAAGAAGGTTCTCCATAGTCCTGTTCTGATCAGCCTCTTTGTTGTTGGAGACTGGGTGACAGCCACATTATCTCTAGCTGCTGCTTCTGCATCAGCTGGCATCACGACGCTATACTTTTATGATTTGGGACATTGCAGTGTAGATAACGAATGTCAAAAATATCAAGCGTCCGTTGGCTTGGCTATTTGC…	MRVFAGTPGTATGLFLRIAQCIFAAGSIASMASTHSFFNFTAFCYLIAAMGLQVIWSFGLALIDAYAIVQKKVLHSPVLISLFVVGDWVTATLSLAAASASAGITTLYFYDLGHCSVDNECQKYQASVGLAICCCFTIATSSLIMLWLLASG*	9	5287262	5290208	1								Cs9g09100.1	100
CitCASPL5C1	Ciclev10026699m	ATGGACGAAGTGCCGGGAGCACTGGGGTCAAGCGCCAGCTTGGCTTTGCGTTTTGGTCAGACCATTTTCTCCTCCGCTTCAATCCTTTTTATGAGTTTTCATGTCGAATTCTACAGCTACACTTCTTTCTGTTATTTGGTGACGGTAATGGGTTTGGTGATTCCATGGAGTATGGCGTTAGGACTAGTAGATGGCTATGCTGTTTTCTTTAAGAATTTACCCCGTCGACCAAGAGTAATGTTATTTGTCATTGCGGGAGATTGGGTTCTGGCATTTCTTTCACTAGCTGCAGCCTGCTCAACAGCAAGTGTTACAGAACTCTTGATGCATGCCAGCCAGCCAAATTGCCCAGCTAAGTTATGCAATAGATATCAAATATCTGCTGCCACTGCTTTCTTG…	MDEVPGALGSSASLALRFGQTIFSSASILFMSFHVEFYSYTSFCYLVTVMGLVIPWSMALGLVDGYAVFFKNLPRRPRVMLFVIAGDWVLAFLSLAAACSTASVTELLMHASQPNCPAKLCNRYQISAATAFLSWFMLFASSLFNLWLLASL*	7	2583839	2584921	-1								Cs1g23460.1	100
CitCASPL5C2	Ciclev10029477m	ATGGCAACGGATAATCAAGTGCCTGGCTCTGTCGGAACCAGTGCTAGTTTGTCTTTGAGATTGGGACAGACCATTTTCTCTTCTGCTTCTCTTCTCTTCATGTCTTTAGGTGTTGAGTTTTACAGCTACACTTCTTTTTGCTACTTGGTAACAATAATGGGTTTGGTCATTCCCTGGAGTTTCACGATGGCAATTGTGGATGGATACTCTGTTCTAGTCAAATGCCCCATTCGCCAACCTGGAGTTCTACTTATAATTGTCGTTGGAGATTGGGTCTTGTCTATTCTTACACTAGCAGCAGCATGTTCAACGGCGAGTGTTGTCGATCTTTTGCTCCGCGCAGAAAATCCTTACTGCCCTCCTAAGTTTTGTAGTCGATATCAAATATCAGCAGCAATG…	MATDNQVPGSVGTSASLSLRLGQTIFSSASLLFMSLGVEFYSYTSFCYLVTIMGLVIPWSFTMAIVDGYSVLVKCPIRQPGVLLIIVVGDWVLSILTLAAACSTASVVDLLLRAENPYCPPKFCSRYQISAAMAFLTWFLSMASSLFNLWLLPSL*	8	4139953	4142124	-1								Cs5g28350.1	100
Laccases
CitLAC1	Ciclev10023643m	ATGGCTAGCTTCACCACTTCATTGATGCTATGGCTATGCTTGTTATTCTGTGTTCACACTGTTCATGTTATGGCAACGTGGCCTCGAGGGAGATCAACGAGGTTTTACGAATTCAAGATACAAGCCACGAGAGTTAACAAACTGTGTAACGCCAAAGACATCGTCACAGTCAACAACATGTTTCCAGGCCCCGTCGTTTACGCCCAAGAAGACGATAGAATCATTGTCAAAGTCACCAATCAATCCCCCTACAATGCGACAATTCACTGGCATGGCGTGAGGCAGAGACTATCGTGCTGGTTTGATGGTCCAGCTTATATCACCCAGTGTCCAATTCAATCTGGACAAACTTTCACGTACGAGTTCACAATGTTTCAGCAAAAGGGCACCTTTTTCTGG…	MASFTTSLMLWLCLLFCVHTVHVMATWPRGRSTRFYEFKIQATRVNKLCNAKDIVTVNNMFPGPVVYAQEDDRIIVKVTNQSPYNATIHWHGVRQRLSCWFDGPAYITQCPIQSGQTFTYEFTMFQQKGTFFWHAHVSWLRGTVYGAIVVYPKTGVPYPFQFPYQEHIIILGEYWLQDVVQLERQVLASGGAPPPSNAYTINGHPGPNYNCSANDVYKIEVVPGKTYLLRLINAGLNMENFFAIANHKLTIVEADAEYTKPFSTDRVMLGPGQTVNVLVTADQPIGKYSMAMGPYMSAQGVSFQNISAIAYFQYLGAQPNSLALPATLPRFNDNLAVKTVMDGLRSLNPVPVPKEIDANLFVTIGLNVQKCRSGNPQQNCRGLNNGVMAASMNNISFIK…	3	47966200	47968775	-1								orange1.1t00518.1	100
CitLAC2	Ciclev10031070m	ATGGAGTTTTTCAACAGTCGTTTCGCAAACTCTTTCGGCTTCTTCTTAGGCCTCGTGCTTCTCATTGCGTCTAATGCATTGTTGTCCTTTGCTAATGCCAAAGCTCACCACCATGATTTTGTTATTCAAGCAACCCCAGTGAAGAGGCTGTGCAAAACTCACAACACAATCACTGTCAACGGAATGTACCCTGGACCAACCTTGGAAGTGAACAATGGCGACACTTTGGTCGTCAAAGTTACCAACAAAGCCAGATATAATGTCACCATTCACTGGCATGGTGTTAGACAAATGAGGACTGCATGGGCGGATGGGCCAGAGTTTGTGACACAGTGCCCAATTAGGCCTGGAATGAGTTACACTTACAGGTTCACAATTCAAGGCCAAGAAGGCACATTG…	MEFFNSRFANSFGFFLGLVLLIASNALLSFANAKAHHHDFVIQATPVKRLCKTHNTITVNGMYPGPTLEVNNGDTLVVKVTNKARYNVTIHWHGVRQMRTAWADGPEFVTQCPIRPGMSYTYRFTIQGQEGTLWWHAHSSWLRATVYGALIIHPKEGSSYPFPKPKRETPILLGEWWDANPIDVVRQATRTGAAPNISDAYTINGQPGDLYNCSSQDTVVVPIDSGETNLLRVINAGLNQPLFFTIANHQFTVVGADASYLKPFTTSVIMLGPGQTTDVLIKGDQPPSRYYLAARAYASAPSAPFDNTTTTAILEYKSAPCPAKKGLSIRPVMPQLPAFNDTATVTAFTKKFRSPQKVEVPTDIDESLFFTVGLGLNNCPRNFGSSRCQGPNGTRFTAS…	4	1742589	1745145	-1	aCL5392Contig1							Cs7g30410.1	100
CitLAC3	Ciclev10003240m	ATGGATATTCCAGCATTGATTACAGTCAAGCCATGGAGCTCTTGCCTGTTACTTGGTGTCTTGTTCATCTTTGCTTTCGTGGCTTCTCTTTCTCATGCAGAAATTCAATTCCATGAGTTTGTTATTGAAGCCAAGCCAGTGAAGAGGCTATGCAGGACCCATAACACTGTTACAGTGAATGGGGAGTTCCCAGGACCAACATTGCTAGTTCGAGATGGAGATACTCTTATCATCACGACTATAAACAGAGCTCAATACAACATTACCCTCCACTGGCATGGAGTAAGCCTGAAGGGAAATCCATGGGCAGATGGTCCTGAATATGTGACTCAGTGCCCAATCCAACCAGGAAGGAGTTACACGTACCAATTCACCATTGAAGACCAAGAGGGAACTTTG…	MDIPALITVKPWSSCLLLGVLFIFAFVASLSHAEIQFHEFVIEAKPVKRLCRTHNTVTVNGEFPGPTLLVRDGDTLIITTINRAQYNITLHWHGVSLKGNPWADGPEYVTQCPIQPGRSYTYQFTIEDQEGTLWWHAHSRWIRATVYGAIIIYPRFGSSYPFPVPNREIPILLGEWWDKNPMDVLMQAIFTGAAPNVSDAFTINGQPGDLYRCSRRETVRFQVEAGETVLLRIINAAMNQELFFGVANHKLTVVGVDTSYTKAFSTSVIMIAPGQTTNVLLTADQPPARYYMAARAYNSANVAFDNTTTTAILAYKSAPCNAKNGGSNSSAPVFPTLPGFNDTATATAYTAQIRSLHEVKVPTAIDEDLFFTVGLGLINCSNPNSPRCQGPNGTRFAAS…	5	3064239	3066603	1								Cs8g11710.1	97.9
CitLAC4	Ciclev10003795m	CTCTTGTTTAGCCTCCGCTCGGCTTCAAATGATTATCTTTTCGTGGTAAAGGAGGCTTCATATACAAGGCTATGCAGCACAAAGGATATCTTGACCGTAAATGGACAATTCCCTGGACCAACTATTAGGGTTTTTACAGGCGATACAATCTTCGTCGAGGTTTCTAATGAAGGCAAAGAAAATATCACCATTCACTGGCACGGAGTGAGACAGCCTAGGTATCCGTGGTCCGATGGTCCTGCATACATAACACAGTGCCCAATCAAACCTGGAGCAAGCTTCAGGCAGAAGATAATTTTTTCGGAAGAGGAAGGAACTCTTTGGTGGCATGCTCACAGTGACTGGTCACGTGCCACAGTACATGGAGCTATCATTATACAGCCGAGGCCTGAAACTGCT…	LLFSLRSASNDYLFVVKEASYTRLCSTKDILTVNGQFPGPTIRVFTGDTIFVEVSNEGKENITIHWHGVRQPRYPWSDGPAYITQCPIKPGASFRQKIIFSEEEGTLWWHAHSDWSRATVHGAIIIQPRPETAGYPFPEPNAEVPIILGEWWKQDVTEVRNELLRTGGLPAASDAFTINGQPGDLYPCSSSETFTLTVDEGKTYLLRIINAAMDEMLFFSIANHDLTVVGTDGAYTNPLTTSYITISPGQTLDVLFQANQNPNLYYMASSVYSTAVNLDFINNTTATAVLQYNGNYTPISSPPLPYLPSRNDTNSAFQFIGSLRSLANEDHPIDVPLDITSSIFSTVSLNTLPCENDNNSCEGPNGTRLAASLNNQSFVEPSPIAILEAYYERINGVYG…	5	39267821	39271450	-1	C. sinensis	ATGGTAAAGGAGGCTTCATATACAAGGCTATGCAGCACAAAGGATATCTTGACCGTAAATGGACAATTCCCTGGACCAACTATTAGGGTTTTTACAGGCGATACAATCTTCGTCGAGGTTTCTAATGAAGGCAAAGAAAATATCACCATTCACTGGCACGGAGTGAGACAGCCTAGGTATCCGTGGTCCGATGGTCCTGCATACATAACACAGTGCCCAATCAAACCTGGAGCAAGCTTCAGGCAGAAGATAATTTTTTCGGAAGAGGAAGGAACTCTTTGGTGGCATGCTCACAGTGACTGGTCACGTGCCACAGTACATGGAGCTATCATTATACAGCCGAGGCCTGAAACTGCTGGCTATCCTTTTCCTGAACCCAATGCGGAAGTTCCAATCATT…	MVKEASYTRLCSTKDILTVNGQFPGPTIRVFTGDTIFVEVSNEGKENITIHWHGVRQPRYPWSDGPAYITQCPIKPGASFRQKIIFSEEEGTLWWHAHSDWSRATVHGAIIIQPRPETAGYPFPEPNAEVPIILGEWWKQDVTEVRNELLRTGGLPAASDAFTINGQPGDLYPCSSSETFTLTVDEGKTYLLRIINAAMDEMLFFSIANHDLTVVGTDGAYTNPLTTSYITISPGQTLDVLFQANQNPNLYYMASSVYSTAVNLDFINNTTATAVLQYNGNYTPISSPPLPYLPSRNDTNSAFQFIGSLRSLANEDHPIDVPLDITSSIFSTVSLNTLPCENDNNSCEGPNGTRLAASLNNQSFVEPSPIAILEAYYERINGVYGENFPDFPPYLFNFT…	5	39267821	39271408	-1	Cs3g22170.1	99.1
CitLAC5	Ciclev10013446m	ATGGCAATACAGCACCCTCGCCACTTGGTTTTGCTCTTGACAATCTTTTGCTTTCTGGGGTTCCTTTCGTTTCCAGCTGATGCAGCAGTAAAGAAGTATCAGTTTGATGTTCAAGTCAACAATGTGAGCAGGTTATGCAATTCCAAACCAATTGTTACTGTCAATGGAATGTTTCCAGGACCTACTATCTATATTAGAGAAGGAGATCGAGTTCTCATCAATGTCACAAACGATGCACAATATAACATGTCTATCCATTGGCATGGCTTGAAGCAATATCGCAATGGTTGGGCTGATGGACCAGCGTATATAACACAGTGCCCCATCAAGACTGGAAACAGTTATACTTACGATTTCAACGTCACAGGACAACGAGGAACGTTGTGGTGGCATGCTCAT…	MAIQHPRHLVLLLTIFCFLGFLSFPADAAVKKYQFDVQVNNVSRLCNSKPIVTVNGMFPGPTIYIREGDRVLINVTNDAQYNMSIHWHGLKQYRNGWADGPAYITQCPIKTGNSYTYDFNVTGQRGTLWWHAHILWLRATVYGAVVIMPKEGTSFPFPQPYQETNIILGEWWNSDVETIVNQGNKLGLPPQTSDAHTINGKSGPLFPCSEKHTFAMEVESGKTYLLRIVNAALNDELFFAIAGHNMTVVEIDAVYTKPFTTQAILIAPGQTTNVLVKADQSPSRYFMAARPFMDAPIPVDNKTVTAILQYKGIPNTVLPTLPSLPAPSDTNFALNYSSNLRSLNTPQYPANVPLRVDRHLFYTIGLGQNPCPSCQNGTQLTASLNNITFVMPKIGLLQA…	6	10154860	10157031	1								Cs6g11860.1	100
CitLAC6	Ciclev10011363m	ATGGGTGCCTTTCATCTTCCTTCATTTGCTTCAATGTCGGTTCTGCTCCTTGGTCTTTGCTTTTTAGCTCTGCTGCCGGAGTTTGCAGCAGGCATAACAAGGCATTACACATTCAATATTAAGTACCACAACGTGACAAGATTGTGCCACACAAGGAACATTATCAGTGTCAATGGACAGTTCCCAGGGCCTAGCCTGGTGGCGCGGGAAGGCGATCGTGTCCTCATTAAAGTGACTAATCATGTTTCAAACAATGTTACCATTCACTGGCATGGGGTTAGGCAGGTAACAAGTGGCTGGGCAGATGGACCTGCTTACGTAACGCAATGTCCCATACAAACAGGCCAATCATACACTTACAATTTTACAATCACTGGACAGAGAGGGACTCTCTTATGG…	MGAFHLPSFASMSVLLLGLCFLALLPEFAAGITRHYTFNIKYHNVTRLCHTRNIISVNGQFPGPSLVAREGDRVLIKVTNHVSNNVTIHWHGVRQVTSGWADGPAYVTQCPIQTGQSYTYNFTITGQRGTLLWHAHISWLRSTLYGPIIILPKRNESYPFQKPHKEIPILFGEWFNVDPEAIISQALQTGAGPNVSDAYTINGLPGPLYNCSSKDTYKLKVKPGKTYLLRLINAALNDELFFSIANHTLTVVEADAVYVKPFDTDKLLITPGQTANVLLRTKPYFPNATFFMQARPYFSGMGTIDNSTTAGILEYKHPSNHSISSKKLQLYKPTLPSINDTSFAVNFTRKFRSLASVKYPANVPQIVDRKFFFTVGLGSNPCPKNTTCQGPNGTKFSAS…	6	14351025	14353403	1								Cs6g06920.1	99.7
CitLAC7	Ciclev10011362m	ATGGGTGCTTCTCTTCTTCCGTCATCGCTAGCAATTTTGTGTGTTTGGTTTCTCTTTCCTGCTGGCCTTGCTGTAGCCAGCATTACCAGGCACTACAAGTTTGATATTAAGATGCAAAATGTGACACGACTGTGCCACACCAAAAGCATAATCACAGTAAATGGACAGTTTCCAGGGCCCCGCATTGTTGCCAGAGAGGGTGATCGTCTTATTATCAAAGTGGTTAATCATGTCCCAAACAACATCTCAATCCATTGGCATGGGATTCGACAGCTACTGAGTGGATGGGCTGATGGGCCTGCATACATAACTCAATGCCCTATACAGACAGGCCAGAGTTATGTATACAATTTCACAATTTCGGGACAAAGAGGGACCCTCTTTTGGCATGCTCATATA…	MGASLLPSSLAILCVWFLFPAGLAVASITRHYKFDIKMQNVTRLCHTKSIITVNGQFPGPRIVAREGDRLIIKVVNHVPNNISIHWHGIRQLLSGWADGPAYITQCPIQTGQSYVYNFTISGQRGTLFWHAHISWLRATVYGPLVIFPKRGVPYPFPKPYKEVPIIFGEWFNADTEAIINQSLQTGAGPNVSDAYTINGLPGPLYNCSAKDTFKLKVKPGKTYLLRLINAALNDELFFSIANHTVTVVDVDAIYMKPFQTDILLITPGQTTNILLKTKPSYPNATFLMSARPYATGQGTFDNSTVAGILEYEAPTKHPRSSTVSIKKLPLMKPTLPALNDTAFAFNYTTRLRSLANAQFPANVPQTVDKRFFFTVGLGTNPCPKNQTCQGPNNSTKFAA…	6	14379909	14382609	-1	aCL7495Contig1							Cs6g06880.1	100
CitLAC8	Ciclev10011377m	ATGGCGCGTTCCATGCTTTTGCTAGCATGCGCTTTAGTTGTTTTAGCTTCTTCTACCTTGTCTTCAGCAGCAGTCGTGGAACACTCATTCCAAGTGAAAAACTTGACGATTGGGCGGCTGTGCCGACAGCAAACGATAACGGCGGTTAACGGGAGCCTCCCTGGTCCGACGATACGCGTTCAAGAGGGTGACACTCTGATTGTTCATGTCTCCAACGAGTCGCCTTATAACATCACTATTCACTGGCATGGAATATTTCAGATTCGAAGCATCTGGGCAGATGGACCAAACATGATAACTCAGTGTCCAATAAGACCTGGAAATAGCTACACTTACAAATTTAGAATCATCAATCAAGAAGGAACCCTTTGGTGGCATGCTCACATCTCAATGCTGCGA…	MARSMLLLACALVVLASSTLSSAAVVEHSFQVKNLTIGRLCRQQTITAVNGSLPGPTIRVQEGDTLIVHVSNESPYNITIHWHGIFQIRSIWADGPNMITQCPIRPGNSYTYKFRIINQEGTLWWHAHISMLRATVHGAFIIRPKSGHKYPFPKPDKEVPIVLGEWWNDDIMDVANRGEITGVGPRISDAFTINGRPGDLYPCSENQTYKLKVEKGKTYLLRIINAALNNQLFFKIANHKFTVVAVDAGYTDPYVTDVVVIAPGQTTDVLLKADQPVGSYYMAARAYAAPPPTIVAFNMNTTRGIVVYDGASTANPIMPALPAYNDTPTAYTFYSNITGLSGGPQWVPCPRRADERMFVTLGLGLEQCPANATCQGPGSQRLSASMNNHSFQAPTSLSI…	6	15301642	15304785	1	aCL1401Contig1							Cs6g07400.1	99.8
CitLAC9	Ciclev10011384m	ATGGCGCATTCTACGCTTTTGCTAGCATGCGCTTTAGTTGTCTTAGCTTCTTCTACATTGGCTTCTGCCGCAATCGTCGAGCACACATTCCATGTGAAAAACTTGACGATTGGGCGGCTGTGCAGACAGCAAACGATAACGGCAGTTAACGGAAGCCTCCCCGGTCCAACGATACGCGTTCACGAGGGTGACACTCTGATTGTTCATGTTTTCAACAAGTCACCTTATAACCTCACTATCCACTGGCATGGAATATTTCAGTTACTAAGCGCCTGGGCAGATGGACCAAGCATGATAACTCAATGTCCAATAACACCTGGAAATAGCTACACTTACAAATTTAGAATCGTCAATCAAGAAGGAACCCTTTGGTGGCATGCTCACTTCTCAATGCTACGT…	MAHSTLLLACALVVLASSTLASAAIVEHTFHVKNLTIGRLCRQQTITAVNGSLPGPTIRVHEGDTLIVHVFNKSPYNLTIHWHGIFQLLSAWADGPSMITQCPITPGNSYTYKFRIVNQEGTLWWHAHFSMLRATVHGALIIRPRSGHKYPFPKPDKEVPIILGEWWNADIIDVANQAQATGGGPNTSDAYTINGRPGDLYPCSQNQTYTLEVEKGKTYLLRIINAALNNQLFFKIANHNFTVVAVDACYTEPYVTDVVVIAPGQTTDVLLKADQPVGSYYMAARAYASAPQIPFDNTTTRGIVVYDGATTANPLMPVLPAFNDNPTAHRFYSNLTGLKDGPQWVPVPLQVDEPMFVTVGLGLDRCPANATCQGLNGQRNSASMNNHSFQAPTSLSLLQ…	6	15311565	15314620	1	aCL1401Contig2							Cs6g07410.1	100
CitLAC10	Ciclev10011375m	ATGGAGCGCTCGATGCTTTTGCTAGCATTTGCTTCAGTCCTTATAGTTTCTTCCACATTGGCTTCTGCTGCAATCGTGGAGCACTCGTTCCATGTGAAAAACTTGACGATTGGGCGGCTGTGCAGGCAGCGGGTGATAACGGCAGTTAACGGACGCCTCCCTGGTCCAACGATACGCGTTCATGAGGGCGACACTCTGGTTGTTCAAGTCTTCAACGAGTCACCTTATAACATCACCATTCACTGGCATGGAATATTTCAGTTACTCAGCCCCTGGGCAGATGGACCAAACATGATAACTCAATGTCCAATAACACCTGGACGTAGCTACACTTACAAATTTAATGTCATCAATCAGGAAGGAACCCTTTGGTGGCATGGTCACGTGTCATTGCTTCGT…	MERSMLLLAFASVLIVSSTLASAAIVEHSFHVKNLTIGRLCRQRVITAVNGRLPGPTIRVHEGDTLVVQVFNESPYNITIHWHGIFQLLSPWADGPNMITQCPITPGRSYTYKFNVINQEGTLWWHGHVSLLRATVYGALIIRPKSGHEYPYPKPDKEVPILLGEWWNANVVDVENQAQITGGAPNISDAYTINGKPGDLYPCSQNPNQIYKLKVVEGKTYLLRIINAALNNQLFFKIANHKFTVVSVDASYTDPYVTDVVVIAPGQTTDVLLKADQPVGSYYMAARAYASAPQIPFDNTTTRGIVVYDGAASSANPLMPALPAFNDTPTAHKFYSNLTGLTDGPQWVPVPRQVDEHMFVTVGLALDRCAANATCQGPNGQRFSASMNNHSFQFPTSLS…	6	15354935	15357478	-1	aCL8493Contig1							Cs6g07450.1	100
CitLAC11	Ciclev10011400m	ATGGACTCCTGGGTTCGGCTTCTTCTTCTCGTAGCATGCCTTTTTCCGGCTCTCGTCGAGTGCCGGGTTCGCCATTACAAGTTCAATGTGGTGATGAAGAATAGCACTAAATTGTGTTCATCCAAGCCAATTGTCACAGTTAATGGCAAGTTCCCGGGACCCACTCTCTATGCGAGGGAACATGACACAGTGCTGGTCAAAGTAGTCAACCATGTCAAATATAATGTCACTATCCACTGGCATGGTGTCCGGCAACTGAGAACCGGCTGGGCCGATGGACCAGCATACATAACACAATGTCCAATTCAGTCAGGGCATAGCTATGTGTACAATTTCACAATCACAGGCCAACGGGGCACACTTCTTTGGCATGCACACATTCTCTGGCTCCGGGCCACC…	MDSWVRLLLLVACLFPALVECRVRHYKFNVVMKNSTKLCSSKPIVTVNGKFPGPTLYAREHDTVLVKVVNHVKYNVTIHWHGVRQLRTGWADGPAYITQCPIQSGHSYVYNFTITGQRGTLLWHAHILWLRATVHGAIVILPKRGVPYPFPKPHKEVVVVLAEWWKSDTEAVINQALRSGLAPNVSDSHTINGQPGPISSCSSQGGFTLPVDSGKTYMLRIINAALNEELFFKIAGHKLTVVEVDATYVKPFKTDTIVIAPGQTTNVLLSADKTSGKYLVAASPFMDAPIAVDNATATATLHYSGTLASSATTLTSTPPKNGTAIANKFIDSLRSLNSKKYPAKVPQTVDHNLLFTVGLGVNPCPSCKAGNGSRVVASINNVTFVMPTIALLQAHFFNI…	6	15761841	15764472	1	aCL3309Contig1							Cs6g07800.1	100
CitLAC12	Ciclev10025287m	ATGGCCAGCCGAAACTGTAGCAATTTCTTTTCTGGGTTAACATGCTTTCTCTTTCTGCTACTTGGACTTCTTTCTTTCCCAGCTGAAGCTGCCATAAAGAAGTACCAGTTCGATGTTCAAGTGAAGAATGTTAGCAGACTATGCCATGCAAAACCGATTGTAACTGTAAATGGGAGGTTCCCTGGTCCTACCATTTACGTAAGAGAGGGAGACAGAGTTCTTGTCAACGTCACAAACCATGCACAATATAACATGTCAATTCATTGGCATGGACTGAAGCAATATCGCAACGGTTGGGCAGATGGACCAGCTTATATAACTCAATGTCCTATCAAGACTGGAAATAGCTACACTTATGACTTCAATGTAACAGGGCAAAGAGGAACATTGTGGTGGCAT…	MASRNCSNFFSGLTCFLFLLLGLLSFPAEAAIKKYQFDVQVKNVSRLCHAKPIVTVNGRFPGPTIYVREGDRVLVNVTNHAQYNMSIHWHGLKQYRNGWADGPAYITQCPIKTGNSYTYDFNVTGQRGTLWWHAHIFWLRATVYGAIVIMPKPGSPFPFPQPNREEVILLGEWWHTDVEEVEKQGQKMGLPPNMSDAHTINGKPGPLFPCSEKHTFAMEVESGKTYLLRIINAALNDELFFAIAGHNFTVVEVDAVYTKPFTTEAILIAPGQTTNVLVQANQKPGRYFMAARPFNDAPIPVDNKTATGILQYKGIPNSLLPTLAQLPASNDSEFALNYNKKLRSLNSPKFPADVPQKVDRKLFYTIGFGKDSCPTCVNGTRLLATLNNISFVMPQTALL…	7	1874573	1876984	-1								Cs1g24250.1	99.6
CitLAC13	Ciclev10030166m	ATGGGAGCTTCTCTTCTTCGATCACCAGCATTTCTAGGAGTCATTTGCTCATTTATCAACTTGTGTCTGCTTGCTGAGCCTGCACTCGGTGTCACCAGGCACTACAAGTTTGATATCAAGTTGCAAAATGTGACCCGTCTTTGTAACACCAAGAGCATTATATCAGTAAATGGGAAGTTTCCAGGGCCTCGCATTGTAGCAAGGGAGGGTGACCAGCTTCTTATCAAAGTTATGAACCATGTCCAGAACAATATTTCCATCCATTGGCATGGAATTAGACAGCTTCGAAGTGGATGGGCCGACGGACCAGCTTATATTACTCAATGCCCCATTCAAACAGGGCAGAGCTACGTTTACAACTTCACCATTGTTGGCCAAAGAGGAACACTCTGGTGGCAT…	MGASLLRSPAFLGVICSFINLCLLAEPALGVTRHYKFDIKLQNVTRLCNTKSIISVNGKFPGPRIVAREGDQLLIKVMNHVQNNISIHWHGIRQLRSGWADGPAYITQCPIQTGQSYVYNFTIVGQRGTLWWHAHLSWLRSTLYGPIIILPKRGIPYPFTKPYKEVPIIFGEWFKADPETIISQALQTGGGPNVSDAYTINGLPGPLYNCSAKDTFKLKVKPGKTYLLRLINAALNDELFFSIANHTLTVVEADAIYVKPFETETLLIAPGQTTNVLLKTKPHYPSATFFMKARPYVTGQGTFDNSTVAGILEYEKPLNFHLSSNSIKNLPLFKPVLPALNDTSFATSFTNKLRSLASTQFPANVPQNVDRRFFFTVGLGTSPCQSNQTCQGPNGTMFQ…	8	22563060	22565235	1								Cs8g17350.1	100
CitLAC14	Ciclev10028090m	ATGGGTGCTTCTCCGGCATTAATGGGATTTGTTTTACTAACAGTTCTGTCATTGTGTCTCCTTCCGGAATCAGTACTTGCCATCACAAGACATTACAAGTTTAATGTCGAATTGAAAAATGTTACTCGCCTGTGCCACACCAAGACCCTTGTATCAGTAAACGGGCAGTTTCCAGGGCCTCGTATTGTAGCAAGGGAGGGTGACCGGCTTCTTATCAAAGTTGTTAATCATGTTCAGCACAATATTTCCATCCATTGGCATGGAATTCGACAGCTTCGAAGTGGATGGGCTGATGGACCGGCATATATAACACAATGCCCCATTCAAACAGGGCAGAGCTACATTTACAACTTCACTATCGTTGGCCAAAGAGGCACCCTCTGGTGGCATGCTCATATT…	MGASPALMGFVLLTVLSLCLLPESVLAITRHYKFNVELKNVTRLCHTKTLVSVNGQFPGPRIVAREGDRLLIKVVNHVQHNISIHWHGIRQLRSGWADGPAYITQCPIQTGQSYIYNFTIVGQRGTLWWHAHISWLRSTLYGPIIILPKRGIPYPFAKPYKEVPIVFGEWFKSDTEAIINQALQTGGGPNVSDAYTFNGLPGPLYNCSAKDAFKLKVKSGKTYLLRLVNSALNDDLFFSIANHTLTVVEVDAVYVKPFETETLVITPGQTTNVLLETKPHYPSATFFMTARPYVTGLGTFDNSTVAGILEYEKPLNFIHSGNSIKKLPLFKPILPPLNDTNFVTNFVNKLRSLGSAQFPANVPQNVDKRFFFTVGLGTSPCPRNQTCQGPNGTMFEASI…	8	22832244	22834513	1								Cs8g17630.1	100
CitLAC15	Ciclev10028036m	ATGGCTACTTCAATTCCTCTATCACAAACAATTCTTGTGGCATTTCTTATTGTGACGAGCTGCATTTGGATGTTTCCTCAGGTTGCCGTGGCCACTTCAAAGCACACAAGCGTCACAAGGCATTACAAGTTTAATATTAGACTGAAAAATGTCACGAGATTGTGCCACACGAAAAGCATGGTGACCGTTAACGGGAAGTTCCCGGGTCCTCGTGTAGTTGCTAGAGAAGGTGACCGTATAATTGTTAAGGTGGTGAATCATGCTCCAAATAATATCAGCATTCATTGGCATGGAATTCGACAACTCCAAAGCGGGTGGGCAGATGGGCCAGCTTATATCACACAGTGTCCCATTCAGACAGGGCAGAGCTATGTGTACAACTTCACCGTTGTTGGCCAA…	MATSIPLSQTILVAFLIVTSCIWMFPQVAVATSKHTSVTRHYKFNIRLKNVTRLCHTKSMVTVNGKFPGPRVVAREGDRIIVKVVNHAPNNISIHWHGIRQLQSGWADGPAYITQCPIQTGQSYVYNFTVVGQRGTLLWHAHFQWLRATVYGPLIILPRHNASYPFAKPYKEVTIMLGNLSFISSNLIESFCHAILLINMIKKIWQIIITTGEWFNADPEAIINQSLQTGNGPNVSEAYTFNGLPGPTYNCSAKDTYKLKVKPGKAYMLRLINTALNDELFFSIANHTLTVVEADATYVKPFETNILVIAPGQTTNVLLKTNPNPPNASFFMLARPYFTGMGTFDNSTVAAILEYETPSQDNSFRNRTLFKPSLPAINATNFVANFSSKFRSLANAQFP…	8	23668042	23670573	-1								Cs8g18800.1	94.2
CitLAC16	Ciclev10028117m	ATGGAGGTGGTTCGGTGGATTCGAGTTCTGTTGCTGGTGGCTTGCCTGTTTCCGGCATCGGTCCAATGCATGGTTCGAGAATACAAGTTCAATGTTGTGATGAAGAACGCCACTAGATTATGCTCAACCAAACCCATCGTCACCGTCAACGGATATTTCCCCGGTCCAACCATCGTCGCCCGAGAAGACGACACCGTGCTCGTAAAAGTCGTCAATCATGTCAAATATAATGTCAGCATCCACTGGCATGGAGTGAGGCAATTGCGGACCTGTTGGGCCGATGGTCCGGCTTACATAACACAGTGCCCCATTCAACCGGGCCAAAATTATATTTACAACTTTACCCTTGCCGGCCAAAGGGGTACACTTTGGTGGCATGCTCACATCCTCTGGCTCAGA…	MEVVRWIRVLLLVACLFPASVQCMVREYKFNVVMKNATRLCSTKPIVTVNGYFPGPTIVAREDDTVLVKVVNHVKYNVSIHWHGVRQLRTCWADGPAYITQCPIQPGQNYIYNFTLAGQRGTLWWHAHILWLRATVHGAIVILPKRGVPYPFPKPHKEVTVILSEWWKSDVEAVINEALKSGLAPNVSDAHTINGHPGPLSSCPSQGGFKLPVESGKTYMLRLINAALNEELFFKIAGHKLTVVEVDAAYVKPFNTETVLIAPGQTTNVLLSAAHATGKYLVAASPFLDTPAILVDNKTATATVHYSGTLGSTATTLTVPPPRNATPVAANFTASLRSLNSKKYPARVPLKIDHSLFFTIGLGINPCATCVNGSRVVADINNVTFVMPTISLLQAHFFK…	8	24234356	24237562	1	aCL6636Contig1|aIC0AAA64DH03FM1_c							Cs8g19850.1	100
CitLAC17	Ciclev10030322m	ATGAAAAGAAATGATCAAATTGTACAGCCATGGAGCTCTTGCCTCTTACTCGGTCTCTTGTTCATCTTTGCCTTCCTGGCTTCTCTTTCTCATGCAGAAATTCACTACCATGAGTTTGTTATTGAAGCCAGGCCAGTGAAGAGGCTGTGCAGAACTCATAGCACTGTTACAGTGAATGGGCAGTTCCCAGGACCAACATTGCAAGTTCGAAATGGTGACACTCTTGTCATCAGGGCTATAAACAGAGCTCGATACAACGTCACCCTCCACTGGCACGGAGTACGCCAGACGAGAAATCCATGGGCAGATGGTCCTGAATATGTGACACAGTGCCCAATCCAACCGGGAAGGAGTTACACATACCGATTCACCATCGAAGACCAAGAGGGAACTTTGTGG…	MKRNDQIVQPWSSCLLLGLLFIFAFLASLSHAEIHYHEFVIEARPVKRLCRTHSTVTVNGQFPGPTLQVRNGDTLVIRAINRARYNVTLHWHGVRQTRNPWADGPEYVTQCPIQPGRSYTYRFTIEDQEGTLWWHAHSRWLRATVYGALIVYPRMGSPYPFPMPKKEIPILIGEWWDRDPMDVLRQALFTGGAPNISDALTINGQPGDLYRCSSKETVRFPVEAGETILLRIINSAMNQEHFFGVANHKLTVVGVDTSYTKPFSTSVIMIAPGQTTNVLLTADRPPARYYMAAHAYNTANAAFDNTTTTAILEYKSAPFNGKKGKSRSSAPIFPILPGFNDTATATAFTARIKSLHQVQVPTVIDENLFFTVGLGLINCSNPNSPRCQGPNGTRFAASI…	8	24890321	24893511	-1								Cs8g20850.1	97.3
Class III Peroxidases
CitPRX1	Ciclev10010461m	ATGGAAACTAAAAGCTTCTTCATTATTCTGTCATCTGTTGTTTTCTCTCTCATAATGACAGGTGCTTCTGCTCAACTTCGTGAAGACTTTTATAGAAGCACCTGCCCAAATGTAGAATCGCTTGTACGCTCGGCAGTCACCAAGAAGTTCACTCAGACCTTTGTCACAGCCCCAGCAACTCTTAGACTCTTTTTCCACGATTGCTTTGTCCGGGGATGTGATGCTTCAGTGCTGCTATCGTCGCCGAATAATCGGGCAGAGAAGGATCACCCAGAAGATATATCACTAGCTGGAGATGGATTTGATACTGTGGTCAAAGCTAAGGAAGCTGTTGATAGTGATCCTCAGTGCAGAAACAAAGTTTCATGTGCTGATATTTTAGCTCTTGCCACTAGAGAT…	METKSFFIILSSVVFSLIMTGASAQLREDFYRSTCPNVESLVRSAVTKKFTQTFVTAPATLRLFFHDCFVRGCDASVLLSSPNNRAEKDHPEDISLAGDGFDTVVKAKEAVDSDPQCRNKVSCADILALATRDVVSLAGGPFYKVELGRRDGRISTIASVQHRLPQPDFNLDQLNRMFSSHGLDQTDMIALSGAHTIGFSHCSRFSKRIYNFSPRNRIDPTLNFNYAMQLRGMCPVRVDPRIAIDMDPTTPRIFDNAYYKNLQQGKGLFTSDQILFSDGRSRDTVVRFASNKEAFNRAFISAITKLGRVGVKTGNQGEIRRDCALVN*	1	27025454	27027577	1	aC08008E07SK_c							Cs4g03740.1	100
[truncated: 2 more rows]
